# Supplementary material
Source: PubMed Central journal article supplement (PMC4154358)

## Supporting Information for:

# Synthesis of $\alpha$ -Ketoester- and $\alpha$ -Hydroxyester-Substituted Isoindazoles via the Thermodynamic Coarctate Cyclization of Ester-Terminated Azo-Ene-Yne Systems

Sean P. McClintock, Nathan Forster, and Michael M. Haley\*

*Department of Chemistry and Materials Science Institute*

*University of Oregon, Eugene, Oregon 97403-1253*

*Fax: 541-346-0487; Tel: 541-346-0456; E-mail: haley@uoregon.edu*

Rainer Herges

*Institut für Organische Chemie, Universität Kiel, 24098 Kiel, Germany*

*rherges@oc.uni-kiel.de*

| <u>Table of Contents</u>                   | <u>Page</u> |
|--------------------------------------------|-------------|
| Experimental Details                       | S2          |
| Transition State Analysis for Cyclizations | S8          |
| Cartesian Coordinates of Stationary Points | S10         |
| Selected Crystal Data for <b>10a</b>       | S23         |
| References                                 | S31         |
| NMR spectra                                | S32         |

## Experimental Details

**Ester 6b.** Triazene **8b** was reacted according to General Procedure B to give **6b** (0.440 g, 68%) as a orange oil.  $^1\text{H}$  NMR ( $\text{CDCl}_3$ )  $\delta$  7.72 (d,  $J = 1.5$  Hz, 1H), 7.50 (m, 2H), 3.81 (q,  $J = 7.2$  Hz, 4H), 3.78 (s, 3H), 1.33, (t,  $J = 7.2$  Hz, 3H), 1.25 (t,  $J = 7.0$  Hz, 3H).  $^{13}\text{C}$  NMR ( $\text{CDCl}_3$ )  $\delta$  156.8, 154.1, 137.5, 133.9, 118.1, 117.4, 114.9, 107.0, 85.0, 82.8, 52.5, 49.9, 42.8, 14.1, 10.4. IR (NaCl)  $\nu$  3309, 2979, 2938, 2876, 2110, 1607, 1396, 1327, 1266, 1102, 1072  $\text{cm}^{-1}$ . HRMS (EI+) for  $\text{C}_{15}\text{H}_{16}\text{N}_3\text{O}_2\text{F}_3$ : calc 327.11946, found 327.12051.

**Ester 6c.** Triazene **8c** was reacted according to General Procedure A to give **6c** (0.955 g, 85%) as a tan solid.  $^1\text{H}$  NMR ( $\text{CDCl}_3$ )  $\delta$  7.79 (d,  $J = 1.2$  Hz, 1H), 7.55 (m, 2H), 3.84 (q,  $J = 7.5$  Hz, 4H), 3.82 (s, 3H), 1.36 (t,  $J = 7.2$  Hz, 3H), 1.30 (t,  $J = 7.2$  Hz, 3H).  $^{13}\text{C}$  NMR ( $\text{CDCl}_3$ )  $\delta$  156.2, 154.5, 131.1, 131.0, 127.8, 127.7, 117.4, 114.4, 84.7, 84.2, 52.7, 49.7, 42.6, 14.4, 10.6. IR (NaCl)  $\nu$  2979, 2938, 2875, 2224, 1712, 1597, 1327, 1269, 1205, 1107  $\text{cm}^{-1}$ . HRMS (EI+) for  $\text{C}_{15}\text{H}_{16}\text{N}_4\text{O}_2$ : calc 284.12732, found 284.12726.

**Ester 6d.** Triazene **8d** was reacted according to General Procedure A to give **6d** (1.01 g, 82%) as a yellow oil.  $^1\text{H}$  NMR ( $\text{CDCl}_3$ )  $\delta$  7.49 (d,  $J = 2.4$  Hz, 1H), 7.38 (d,  $J = 8.9$  Hz, 1H), 7.28 (dd,  $J = 8.9, 2.4$  Hz), 3.80 (s, 3H), 3.79 (q,  $J = 6.9$  Hz, 4H), 1.30 (br t, 6H).  $^{13}\text{C}$  NMR ( $\text{CDCl}_3$ )  $\delta$  154.5, 152.8, 133.0, 131.3, 129.3, 118.3, 115.4, 84.7, 84.2, 52.6, 49.4, 42.2, 14.4, 10.6. IR (NaCl)  $\nu$  2977, 2936, 2874, 2223, 1712, 1389, 1331, 1270, 1168, 1105  $\text{cm}^{-1}$ . HRMS (EI+) for  $\text{C}_{14}\text{H}_{16}\text{N}_3\text{O}_2\text{Cl}$ : calc 293.09310, found 293.09350.

**Ester 6e.** Triazene **8e** was reacted according to General Procedure A to give **6e** (1.06 g, 75%) as an orange solid.  $^1\text{H}$  NMR ( $\text{CDCl}_3$ )  $\delta$  7.54 (dd,  $J = 7.8, 0.9$  Hz, 1H), 7.43 (dd,  $J = 8.1, 0.9$  Hz, 1H), 7.36 (dt,  $J = 7.6, 1.3$  Hz, 1H), 7.07 (dt,  $J = 7.8, 1.3$  Hz, 1H), 3.81 (s, 3H), 3.80 (q,  $J = 6.9$  Hz, 4H), 1.32 (br t, 6H).  $^{13}\text{C}$  NMR ( $\text{CDCl}_3$ )  $\delta$  154.9, 154.4, 133.9, 131.3, 124.5, 117.2, 114.2, 86.1, 84.1, 52.5, 49.3, 42.1, 14.5, 10.8. IR (NaCl)  $\nu$  2976, 2936, 2874, 2218, 1710, 1302, 1268, 1198, 1094  $\text{cm}^{-1}$ . HRMS (EI+) for  $\text{C}_{14}\text{H}_{17}\text{N}_3\text{O}_2$ : calc 259.13208, found 259.13201.

**Ester 6f.** Triazene **8f** was reacted according to General Procedure A to give **6f** (1.75 g, 68%) as a red oil.  $^1\text{H}$  NMR ( $\text{CDCl}_3$ )  $\delta$  7.35 (d,  $J = 1.3$  Hz, 1H), 7.33 (d,  $J = 8.5$  Hz, 1H), 7.16 (dd,  $J =$

8.5, 1.3 Hz, 1H), 3.81 (s, 3H), 3.79 (q,  $J = 7.2$  Hz, 4H), 1.31 (br t, 6H).  $^{13}\text{C}$  NMR ( $\text{CDCl}_3$ )  $\delta$  154.8, 152.1, 134.2, 134.0, 132.2, 117.0, 113.9, 86.3, 83.8, 52.4, 49.1, 41.9, 20.6, 14.4, 10.9. IR (NaCl)  $\nu$  2975, 2935, 2214, 1709, 1215, 1148, 1102  $\text{cm}^{-1}$ . HRMS (EI+) for  $\text{C}_{15}\text{H}_{19}\text{N}_3\text{O}_2$ : calc 273.14773, found 273.14705.

**Ester 6g.** Triazene **8g** was reacted according to General Procedure A to give **6g** (0.125 g, 65%) as a red oil.  $^1\text{H}$  NMR ( $\text{CDCl}_3$ )  $\delta$  7.56 (d,  $J = 2.1$  Hz, 1H), 7.40 (dd,  $J = 8.7, 2.1$  Hz, 1H), 7.35 (d,  $J = 8.7$  Hz, 1H), 3.81 (s, 3H), 3.79 (q,  $J = 7.5$  Hz, 4H), 1.30 (m, 15H).  $^{13}\text{C}$  NMR ( $\text{CDCl}_3$ )  $\delta$  154.9, 152.1, 147.5, 130.6, 128.8, 116.9, 113.4, 86.8, 85.5, 52.5, 49.0, 41.9, 34.3, 31.1, 14.4, 10.8. IR (NaCl)  $\nu$  2964, 2871, 2214, 1711, 1465, 1392, 1271, 1205, 1169, 1106  $\text{cm}^{-1}$ . HRMS (EI+) for  $\text{C}_{18}\text{H}_{25}\text{N}_3\text{O}_2$ : calc 315.19468, found 315.19524.

**Ester 6h.** Triazene **8h** was reacted according to General Procedure A to give **6h** (0.083 g, 65%) as a red oil.  $^1\text{H}$  NMR ( $\text{CDCl}_3$ )  $\delta$  7.28 (d,  $J = 9.1$  Hz, 1H), 7.03 (d,  $J = 2.7$  Hz, 1H), 6.94 (dd,  $J = 9.1, 2.7$  Hz, 1H), 3.80 (s, 3H), 3.78 (s, 3H), 3.76 (q,  $J = 6.9$  Hz, 4H), 1.29 (t,  $J = 6.9$  Hz, 6H).  $^{13}\text{C}$  NMR ( $\text{CDCl}_3$ )  $\delta$  156.4, 154.7, 148.5, 119.1, 118.2, 116.5, 114.5, 85.9, 83.9, 55.5, 52.5, 49.1 (br), 41.8 (br), 14.6 (br), 11.0 (br). IR (NaCl)  $\nu$  2973, 2936, 2872, 2213, 1709, 1456, 1226, 1153, 1034  $\text{cm}^{-1}$ . HRMS for  $\text{C}_{15}\text{H}_{19}\text{N}_3\text{O}_3$ : calc 289.14265, found 289.14288.

**$\alpha$ -Ketoester 9b.** Ester **6b** was cyclized according to General Procedure C to give **9b** (20 mg, 85%) as a yellow solid.  $^1\text{H}$  NMR ( $\text{CDCl}_3$ )  $\delta$  8.62 (d,  $J = 1.4$  Hz, 1H), 7.88 (d,  $J = 8.9$  Hz, 1H), 7.57 (dd,  $J = 8.9, 1.4$  Hz, 1H), 3.97 (s, 3H), 3.30 (q,  $J = 7.2$  Hz, 4H), 0.94 (t,  $J = 7.2$  Hz, 6H).  $^{13}\text{C}$  NMR ( $\text{CDCl}_3$ )  $\delta$  177.2, 163.7, 146.3, 129.8, 128.6, 128.3, 120.5, 120.0, 118.6, 110.1, 52.6, 52.2, 11.1. IR (NaCl)  $\nu$  2983, 2955, 2878, 2228, 1747, 1662, 1327, 1251, 1167, 1015  $\text{cm}^{-1}$ . HRMS (EI+) for  $\text{C}_{15}\text{H}_{16}\text{N}_3\text{O}_3\text{F}_3$ : calc 343.11438, found 343.11417.

**$\alpha$ -Ketoester 9c.** Ester **6c** was cyclized according to General Procedure C to give **9c** (61 mg, 92%) as a orange solid.  $^1\text{H}$  NMR ( $\text{CDCl}_3$ )  $\delta$  8.55 (d,  $J = 1.2$  Hz, 1H), 7.91 (d,  $J = 9.0$  Hz, 1H), 7.62 (dd,  $J = 9.0, 1.2$  Hz, 1H), 3.98 (s, 3H), 3.31 (q,  $J = 7.5$  Hz, 4H), 0.95 (t,  $J = 7.5$  Hz, 6H).  $^{13}\text{C}$  NMR ( $\text{CDCl}_3$ )  $\delta$  177.2, 163.7, 146.3, 129.8, 128.6, 128.3, 120.5, 120.0, 118.9, 110.1, 52.6,

52.2, 11.1. IR (NaCl)  $\nu$  2981, 2954, 2876, 2228, 1745, 1662, 1653, 1507, 1456, 1213, 1017  $\text{cm}^{-1}$ .  
<sup>1</sup>H NMR (CDCl<sub>3</sub>)  $\delta$  8.25 (d,  $J$  = 1.8 Hz, 1H), 7.77 (d,  $J$  = 9.0 Hz, 1H), 7.42 (dd,  $J$  = 9.0, 1.8 Hz, 1H), 3.99 (s, 3H), 3.30 (m, 4H), 0.96 (t,  $J$  = 7.2 Hz, 6H). <sup>13</sup>C NMR (CDCl<sub>3</sub>)  $\delta$  177.3, 164.3, 144.5, 133.2, 129.0, 133.3, 120.5, 120.3, 120.0, 52.3, 52.2, 29.1, 11.1. IR (NaCl)  $\nu$  2980, 2952, 2873, 1744, 1653, 1506, 1153, 1015  $\text{cm}^{-1}$ . HRMS (EI+) for C<sub>14</sub>H<sub>17</sub>N<sub>3</sub>O<sub>3</sub>Cl: calc 310.09585, found 310.09675.

**$\alpha$ -Ketoester 9d.** Ester **6d** was cyclized according to General Procedure C to give **9d** (15 mg, 60%) as a orange solid. <sup>1</sup>H NMR (CDCl<sub>3</sub>)  $\delta$  8.25 (d,  $J$  = 1.8 Hz, 1H), 7.77 (d,  $J$  = 9.0 Hz, 1H), 7.42 (dd,  $J$  = 9.0, 1.8 Hz, 1H), 3.99 (s, 3H), 3.30 (m, 4H), 0.96 (t,  $J$  = 7.2 Hz, 6H). <sup>13</sup>C NMR (CDCl<sub>3</sub>)  $\delta$  177.3, 164.3, 144.5, 133.2, 129.0, 133.3, 120.5, 120.3, 120.0, 52.3, 52.2, 29.1, 11.1. IR (NaCl)  $\nu$  2980, 2952, 2873, 1744, 1653, 1506, 1153, 1015  $\text{cm}^{-1}$ . HRMS (EI+) for C<sub>14</sub>H<sub>17</sub>N<sub>3</sub>O<sub>3</sub>Cl: calc 310.09585, found 310.09675.

**$\alpha$ -Ketoester 9e.** Ester **6e** was cyclized according to General Procedure C to give **9e** (19 mg, 75%) as a orange oil. <sup>1</sup>H NMR (CDCl<sub>3</sub>)  $\delta$  8.21 (dd,  $J$  = 7.5, 2.1 Hz, 1H), 7.81 (dd,  $J$  = 7.8, 1.8 Hz, 1H), 7.43 (m, 2H), 3.96 (s, 3H), 3.30 (m, 4H), 0.94 (t,  $J$  = 7.5 Hz, 6H). <sup>13</sup>C NMR (CDCl<sub>3</sub>)  $\delta$  177.5, 164.5, 146.2, 127.5, 127.0, 121.8, 121.4, 118.5, 52.3, 52.1, 11.1. IR (NaCl)  $\nu$  2980, 2941, 2871, 1743, 1652, 1456, 1254, 1018  $\text{cm}^{-1}$ . HRMS (EI+) for C<sub>14</sub>H<sub>17</sub>N<sub>3</sub>O<sub>3</sub>: calc 275.12700, found 275.12711.

**$\alpha$ -Ketoester 9f.** Ester **6f** was cyclized according to General Procedure C to give **9f** (22 mg, 88%) as a orange oil. <sup>1</sup>H NMR (CDCl<sub>3</sub>)  $\delta$  7.99 (d,  $J$  = 1.2 Hz, 1H), 7.70 (d,  $J$  = 8.7 Hz, 1H), 7.28 (dd,  $J$  = 8.7, 1.2 Hz, 1H), 3.95 (s, 3H), 3.27 (m, 4H), 2.49 (s, 3H), 0.94 (t,  $J$  = 7.2 Hz, 6H). <sup>13</sup>C NMR (CDCl<sub>3</sub>)  $\delta$  177.5, 164.7, 145.0, 137.4, 130.2, 128.1, 122.2, 119.8, 118.2, 52.2, 52.1, 22.1, 11.1. IR (NaCl)  $\nu$  2979, 2979, 2868, 1744, 1651, 1627, 1523, 1455, 1256, 1198, 1121, 1018  $\text{cm}^{-1}$ . HRMS (EI+) for C<sub>15</sub>H<sub>19</sub>N<sub>3</sub>O<sub>3</sub>: calc 289.14265, found 289.14201.

**$\alpha$ -Ketoester 9g.** Ester **6g** was cyclized according to General Procedure C to give **9g** (23 mg, 88%) as a orange oil. <sup>1</sup>H NMR (CDCl<sub>3</sub>)  $\delta$  8.14 (d,  $J$  = 1.8 Hz, 1H), 7.77 (d,  $J$  = 9.0 Hz, 1H), 7.57 (dd,  $J$  = 9.0, 1.8 Hz, 1H), 3.96 (s, 3H), 3.28 (m, 4H), 1.40 (s, 9H), 0.93 (t,  $J$  = 7.2 Hz, 6H). <sup>13</sup>C NMR (CDCl<sub>3</sub>)  $\delta$  177.6, 164.7, 150.5, 144.9, 128.8, 127.0, 122.0, 118.0, 115.9, 52.2, 52.1, 35.3, 31.2, 11.1. IR (NaCl)  $\nu$  2964, 2870, 1744, 1652, 1457, 1259, 1156, 1016  $\text{cm}^{-1}$ . HRMS (EI+) for C<sub>18</sub>H<sub>25</sub>N<sub>3</sub>O<sub>3</sub>: calc 331.18960, found 331.19006.

**$\alpha$ -Ketoester 9h.** Ester **6h** was cyclized according to General Procedure C to give **9h** (15 mg, 69%) as a orange solid.  $^1\text{H}$  NMR ( $\text{CDCl}_3$ )  $\delta$  7.68 (d,  $J = 9.3$  Hz, 1H), 7.74 (d,  $J = 2.4$  Hz, 1H), 7.11 (dd,  $J = 9.3, 2.4$  Hz, 1H), 3.96 (s, 3H), 3.91 (s, 3H), 3.26 (m, 4H), 0.94 (t,  $J = 7.5$  Hz, 6H).  $^{13}\text{C}$  NMR ( $\text{CDCl}_3$ )  $\delta$  177.5, 164.8, 159.5, 142.4, 123.1, 122.1, 120.0, 99.9, 98.1, 55.7, 52.2, 52.0, 11.1. IR (NaCl)  $\nu$  2977, 2950, 2870, 1742, 1652, 1526, 1216, 1018  $\text{cm}^{-1}$ . HRMS (EI+) for  $\text{C}_{15}\text{H}_{19}\text{N}_3\text{O}_4$ : calc 305.13756, found 305.13759.

**$\alpha$ -Hydroxyester 10b.** Ester **6b** cyclized according to General Procedure D to give **10b** (26 mg, 99%) as a white solid.  $^1\text{H}$  NMR ( $\text{CDCl}_3$ )  $\delta$  8.09 (d,  $J = 1.0$  Hz, 1H), 7.71 (d,  $J = 9.0$  Hz, 1H), 7.40 (dd,  $J = 9.0, 1.0$  Hz, 1H), 5.93 (s, 1H), 4.3 (br s, 1H), 3.76 (s, 3H), 3.5-3.1 (m, 4H), 0.88 (br t, 6H).  $^{13}\text{C}$  NMR ( $\text{CDCl}_3$ )  $\delta$  172.2, 146.4, 133.3, 124.7, 122.4, 118.8, 118.4, 118.2, 116.1, 64.6, 53.4, 52.5, 52.3, 11.8. IR (NaCl)  $\nu$  3324, 2977, 2955, 2933, 2879, 1751, 1313, 1118, 1081  $\text{cm}^{-1}$ . HRMS (EI+) for  $\text{C}_{15}\text{H}_{18}\text{N}_3\text{O}_3\text{F}_3$ : calc 345.13003, found 345.12974.

**$\alpha$ -Hydroxyester 10c.** Ester **6c** cyclized according to General Procedure D to give **10c** (24 mg, 92%) as a tan solid.  $^1\text{H}$  NMR ( $\text{CDCl}_3$ )  $\delta$  7.94 (d,  $J = 1.5$  Hz, 1H), 7.77 (d,  $J = 9.0$  Hz, 1H), 7.47 (dd,  $J = 9.0, 1.5$  Hz, 1H), 5.94 (d,  $J = 6.3$  Hz, 1H), 4.19 (d,  $J = 6.3$  Hz, 1H), 3.78 (s, 3H), 3.6-3.2 (m, 4H), 0.92 (t,  $J = 6.9$  Hz, 3H), 0.90 (t,  $J = 6.9$  Hz, 3H).  $^{13}\text{C}$  NMR ( $\text{CDCl}_3$ )  $\delta$  172.2, 146.5, 133.3, 122.5, 122.4, 118.8, 118.4, 118.3, 116.1, 64.6, 53.3, 52.5, 52.3, 11.8. IR (NaCl)  $\nu$  3420, 1977, 2937, 2875, 2223, 1750, 1436, 1216, 1094  $\text{cm}^{-1}$ . HRMS (EI+) for  $\text{C}_{15}\text{H}_{18}\text{N}_4\text{O}_3$ : calc 302.13789, found 302.13800.

**$\alpha$ -Hydroxyester 10d.** Ester **6d** was cyclized according to General Procedure D to give **10d** (28 mg, 95%) as a white solid.  $^1\text{H}$  NMR ( $\text{CDCl}_3$ )  $\delta$  7.61 (d,  $J = 9.0$  Hz, 1H), 7.56 (d,  $J = 2.1$  Hz, 1H), 7.24 (dd,  $J = 9.0, 2.1$  Hz, 1H), 5.87 (d,  $J = 6.6$  Hz, 1H), 4.13 (d,  $J = 6.6$  Hz, 1H), 3.77 (m, 3H), 3.5-3.1 (m, 4H), 0.90 (br t, 6H).  $^{13}\text{C}$  NMR ( $\text{CDCl}_3$ )  $\delta$  172.4, 144.2, 131.0, 128.0, 127.8, 119.2, 118.2, 117.8, 64.5, 53.3, 52.5, 52.2, 11.8. IR (NaCl)  $\nu$  3365, 2977, 2954, 2875, 1749, 1212, 1114, 1079  $\text{cm}^{-1}$ . HRMS (EI+) for  $\text{C}_{14}\text{H}_{18}\text{N}_3\text{O}_3\text{Cl}$ : calc 311.10367, found 311.10367.

**$\alpha$ -Hydroxyester 10e.** Ester **6e** was cyclized according to General Procedure D to give **10e** (29 mg, 95%) as a orange solid.  $^1\text{H}$  NMR ( $\text{CDCl}_3$ )  $\delta$  7.68 (d,  $J = 9.0$  Hz, 1H), 7.58 (d,  $J = 8.7$  Hz,

1H), 7.31 (t,  $J = 6.6$  Hz, 1H), 7.10 (t,  $J = 7.8$  Hz, 1H), 5.91 (d,  $J = 6.9$  Hz, 1H), 4.21 (d,  $J = 6.9$  Hz, 1H), 3.75 (s, 3H), 3.5-3.1 (m, 4H), 0.91 (t,  $J = 7.2$  Hz, 6H).  $^{13}\text{C}$  NMR ( $\text{CDCl}_3$ )  $\delta$  172.7, 145.9, 126.4, 122.3, 119.4, 117.6, 117.4, 64.6, 53.1, 52.6, 52.2, 11.9. IR (NaCl)  $\nu$  3392, 2977, 2872, 1750, 1211, 1103, 1074  $\text{cm}^{-1}$ . HRMS (EI+) for  $\text{C}_{14}\text{H}_{19}\text{N}_3\text{O}_3$ : calc 277.14265, found 277.14273.

**$\alpha$ -Hydroxyester 10f.** Ester **6f** was cyclized according to General Procedure D to give **10f** (21 mg, 90%) as a tan solid.  $^1\text{H}$  NMR ( $\text{CDCl}_3$ )  $\delta$  7.58 (d,  $J = 8.7$  Hz, 1H), 7.32 (d,  $J = 1.5$  Hz, 1H), 7.15 (dd,  $J = 8.7, 1.5$  Hz, 1H), 5.89 (d,  $J = 7.0$  Hz, 1H), 4.14 (d,  $J = 7.0$  Hz, 1H), 3.76 (s, 3H), 3.5-3.3 (m, 2H), 3.28-3.12 (m, 2H), 2.41 (s, 3H), 0.90 (t,  $J = 7.5$  Hz).  $^{13}\text{C}$  NMR ( $\text{CDCl}_3$ )  $\delta$  172.8, 144.7, 131.7, 130.1, 129.3, 117.6, 117.4, 117.3, 64.6, 53.0, 52.5, 52.1, 21.7, 11.9 IR (NaCl)  $\nu$  3333, 2977, 2868, 1750, 1528, 1435, 1214, 1098, 1066  $\text{cm}^{-1}$ . HRMS (EI+) for  $\text{C}_{15}\text{H}_{21}\text{N}_3\text{O}_3$ : calc 291.15830, found 291.15884.

**$\alpha$ -Hydroxyester 10g.** Ester **6g** was cyclized according to General Procedure D to give **10g** (20 mg, 95%) as a tan solid.  $^1\text{H}$  NMR ( $\text{CDCl}_3$ )  $\delta$  7.63 (d,  $J = 8.7$  Hz, 1H), 7.44 (m, 2H), 5.90 (d,  $J = 7.1$  Hz, 1H), 4.22 (d,  $J = 7.1$  Hz, 1H), 3.76 (s, 3H), 3.5-3.1 (m, 4H), 1.36 (s, 9H), 0.92 (t,  $J = 6.9$  Hz, 6H).  $^{13}\text{C}$  NMR ( $\text{CDCl}_3$ )  $\delta$  172.8, 144.9, 144.7, 130.7, 126.2, 117.3, 117.2, 113.4, 64.7, 53.1, 52.5, 52.1, 34.9, 31.2, 11.9, 11.8. IR (NaCl)  $\nu$  3274, 2963, 2869, 1750, 1456, 1256, 1206, 1120, 1083  $\text{cm}^{-1}$ . HRMS (EI+) for  $\text{C}_{18}\text{H}_{27}\text{N}_3\text{O}_3$ : calc 333.20525, found 333.20535.

**$\alpha$ -Hydroxyester 10h.** Ester **6h** was cyclized according to General Procedure D to give **10a** (22 mg, 88%) as a orange solid.  $^1\text{H}$  NMR ( $\text{CDCl}_3$ )  $\delta$  7.57 (d,  $J = 9.3$  Hz, 1H), 7.00 (dd,  $J = 9.3, 2.4$  Hz, 1H), 6.76 (d,  $J = 2.4$  Hz, 1H), 5.88 (d,  $J = 6.9$  Hz, 1H), 4.18 (d,  $J = 6.9$  Hz, 1H), 3.82 (s, 3H), 3.76 (s, 3H), 3.5-3.1 (m, 4H), 0.90 (t,  $J = 7.2$  Hz, 6H).  $^{13}\text{C}$  NMR ( $\text{CDCl}_3$ )  $\delta$  172.8, 155.5, 142.5, 129.9, 121.3, 119.1, 117.3, 95.6, 64.7, 55.4, 53.0, 52.5, 52.1, 11.9. IR (NaCl)  $\nu$  3291, 2962, 2906, 2869, 1750, 1457, 1256, 1207, 1083  $\text{cm}^{-1}$ . HRMS (EI+) for  $\text{C}_{15}\text{H}_{21}\text{N}_3\text{O}_4$ : calc 307.15321, found 307.15356.

**$\alpha$ -Methoxyester 11a.** To a flame dried RBF was added **6f** (25 mg, 0.09 mmol),  $\text{Rh}(\text{OAc})_2]_2$  (2 mg, 0.004), distilled MeOH (0.1 mL) and distilled DCE (5 mL). The reaction was stirred under

Ar at rt until complete by TLC. The resulting solution was filtered through a plug of silica eluting with 1:1 hexanes:ethyl acetate. Purification by preparative TLC afforded **11a** (10 mg, 40 %) as a tan solid.  $^1\text{H}$  NMR ( $\text{CDCl}_3$ )  $\delta$  7.58 (d,  $J = 9.0$  Hz, 1H), 7.48 (d,  $J = 1.2$  Hz, 1H), 7.14 (dd,  $J = 9.0, 1.2$  Hz, 1H), 5.63 (s, 1H), 3.74 (s, 3H), 3.47 (s, 3H), 3.4-3.1 (m, 4H), 2.40 (s, 3H), 0.90 (m, 6H).  $^{13}\text{C}$  NMR ( $\text{CDCl}_3$ )  $\delta$  169.7, 144.8, 131.8, 129.3, 128.8, 118.8, 188.1, 117.2, 73.5, 57.7, 52.6, 52.2, 52.9, 29.6, 21.8, 12.1. IR (NaCl)  $\nu$  2976, 2936, 2866, 2825, 1751, 1652, 1558, 1456, 1105. HRMS (EI+) for  $\text{C}_{16}\text{H}_{23}\text{N}_3\text{O}_3$ : calc 305.17395, found 305.17368.

**$\alpha$ -Deuteroyester 11b.** To a flame dried RBF was added **6d** (25 mg, 0.08 mmol),  $\text{Rh}(\text{OAc})_2]_2$  (2 mg, 0.004),  $\text{D}_2\text{O}$  (0.1 mL) and distilled DCE (5 mL). The reaction was stirred under Ar at rt until complete by TLC. The resulting solution was filtered through a plug of silica eluting with 1:1 hexanes:ethyl acetate to give **11b** as a tan solid (22 mg, 87 %). The product was a mixture of the D-OD, H-OD and D-OH trapped products.  $^1\text{H}$  NMR ( $\text{CDCl}_3$ )  $\delta$  7.61 (d,  $J = 5.4$  Hz, 1H), 7.57 (d,  $J = 0.9$  Hz, 1H), 7.23 (dd,  $J = 9.0, 1.2$  Hz, 1H), 5.86 (m, 0.3H), 4.09 (m, .8H), 3.77 (s, 3H), 3.4-3.1 (m, 4H), 0.90 (m, 6H).  $^{13}\text{C}$  NMR ( $\text{CDCl}_3$ ) 172.4, 144.3, 130.9, 128.0, 127.8, 119.2, 118.1, 117.7, 64.4, 53.2, 52.5, 52.2, 11.8.  $\delta$  IR (NaCl)  $\nu$  3446, 2977, 2873, 1748, 1652, 1263. HRMS (EI+) for  $\text{C}_{14}\text{H}_{15}\text{N}_3\text{O}_3\text{ClD}_2$ : calc 311.10212, found 311.10403; for  $\text{C}_{14}\text{H}_{16}\text{N}_3\text{O}_3\text{ClD}$ : calc 312.10840, found 312.10974.

**$\alpha$ -Aminoester 11c.** To a flame dried RBF was added **6d** (50 mg, 0.18 mmol),  $\text{Rh}(\text{OAc})_2]_2$  (4 mg, 0.008),  $\text{H}_2\text{NPr}$  (0.1 mL) and distilled DCE (10 mL). The reaction was stirred under Ar at rt until complete by TLC. The resulting solution was filtered through a plug of silica eluting with 1:1 hexanes:ethyl acetate. Purification by preparative TLC yielded **11c** as a yellow oil (34 mg, 56%).  $^1\text{H}$  NMR ( $\text{CDCl}_3$ )  $\delta$  8.66 (m, 1H) 7.37 (d,  $J = 8.7$  Hz, 1H), 7.27 (dd,  $J = 8.7, 2.1$  Hz, 1H), 7.20 (d,  $J = 2.1$  Hz, 1H), 4.43 (s, 1H), 3.70 (n, 7H), 2.87 (m, 2H), 1.45 (q,  $J = 7.5\text{Hz}$ , 2H), 1.2 (m, 6H), 0.90 (t,  $J = 7.5$  Hz, 6H).  $^{13}\text{C}$  NMR ( $\text{CDCl}_3$ )  $\delta$  171.0, 165.0, 145.8, 134.4, 130.4, 130.1, 129.2, 116.7, 82.3, 52.6, 49.9, 45.9, 23.5, 20.8, 11.3 IR (NaCl)  $\nu$  3243, 3066, 2973, 2935, 2874, 1733, 1652, 1456. HRMS (EI+) for  $\text{C}_{17}\text{H}_{25}\text{N}_4\text{O}_2\text{Cl}$ : calc 352.16660, found 352.16759.

## Transition State Analysis for Cyclizations

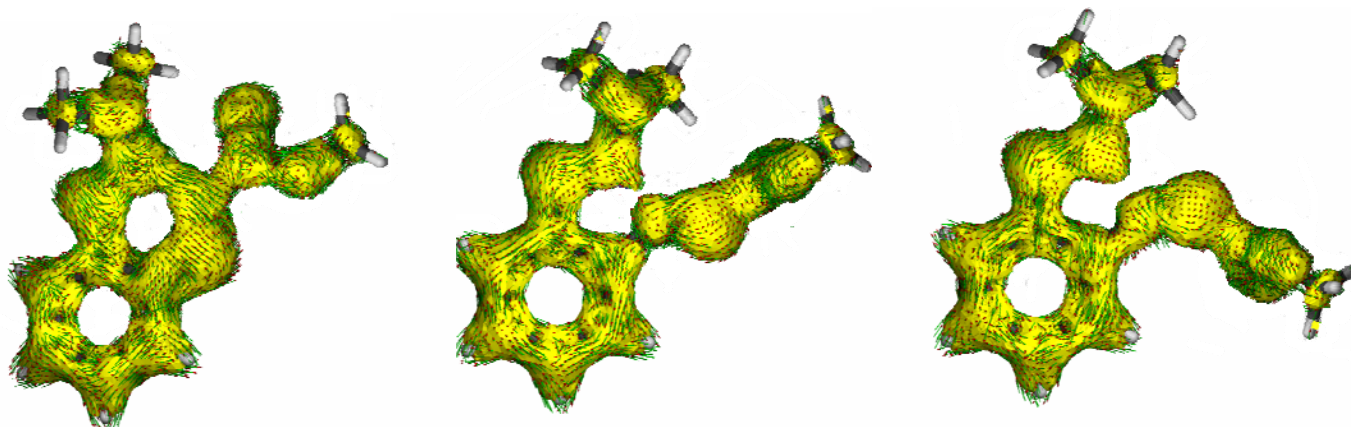

**FIGURE S1.** Electron flow in the non-planar TS of the pericyclic (**4 peri**, left) and coarctate (**4 anti**, middle and **4 syn**, right) reaction of **4** (Figure 2) with ACID plots taken at isosurface value of 0.05. The vector field of the induced current density depends on the relative orientation of the molecule with respect to the magnetic field. The magnetic field in all plots is orthogonal with respect to the benzene ring. The scale (length of the arrows) is a function of the strength of the induced current at the point of origin of the arrow.

**TABLE S1.** Transition state analysis for the dual cyclization of triazene **4**.

|               | CIV    | angle <sup>a</sup> |
|---------------|--------|--------------------|
| <b>4 peri</b> | 0.0812 | 2.9                |
| <b>4 syn</b>  | 0.0277 | 5.8                |
| <b>4 anti</b> | 0.0497 | 6.3                |

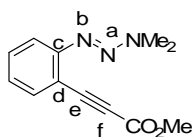

<sup>a</sup>Dihedral angle defined as  $\angle a-b-d-e$

ACID (Anisotropy of the Induced Current Density) is a method developed by the Herges group to visualize the density of electrons which are not localized at an atom or bond but are “mobile” within a molecule if subjected to a magnetic field.<sup>1</sup> ACID is interpreted as the density of delocalized electrons and plotted as an isosurface. Further information about the delocalization of electrons is obtained by plotting the current density on top of the ACID isosurface. The arrows (green arrows with red arrow head) represent strength and direction of the induced current and thus allow one to differentiate diatropic (aromatic) and paratropic (antiaromatic) ring currents. A coarctate reaction is characterized by a hairpin-like pinched cycle



in bond making and bond breaking. By visualizing the response of the electrons to the external magnetic field, it is possible to see this ‘looping’ of electrons in an ACID diagram (Figure S1). Previously the ACID method to distinguish between pericyclic/pseudopericyclic and coarctate/pseudocoarctate by others as well as ourselves.<sup>2,3</sup> The “disconnection” in the otherwise contiguous cyclic (pericyclic) or constricted (coarctate) system of delocalized electrons in the transition state, which is characteristic to a pseudo (pericyclic or coarctate) reaction, is clearly visible in the ACID plot as a disconnection of the isosurface. To quantify the “degree” of electron delocalization we defined the so called “critical isosurface value” (CIV). The CIV is the ACID value (density of delocalized electrons) at the point of the lowest delocalization in a conjugated system. Applied to transition states of pericyclic and coarctate reactions, the CIV gives a number that determines the “degree” of disconnection (a CIV of zero would imply a perfect disconnection of electron delocalization and thus a perfect pseudo type reaction). We previously defined pericyclic and coarctate reactions with a CIV value below 0.025 as a pseudo type reaction while values above 0.03 are taken as the true form.<sup>3</sup> Values in between are classified as borderline. Additionally, true pericyclic/coarctate transition states would be non-planar to allow for the to allow for the orbital overlap necessary for an aromatic transition state. Alternatively, if the lone pair electrons are participating in the cyclization (pseudopericyclic/pseudocoarctate), the transition states would be planar.

Analysis of the ACID plots reveal that the 5 membered ring formation does proceed through a coarctate mechanism. In the TS it is possible to see the hallmark ‘looping’ of the electrons at the carbene carbon. The transition states for **4 peri**, **4 syn** and **4 anti** are all non planar indicating that they are the “true” reactions. The CIV for **4 peri** and **4 anti** are well above the 0.03 threshold, and coupled with the non-planar transition states they can be labeled as true pericyclic/coarctate cyclizations. The CIV of **4 syn** is in the borderline region, however

together with the non-planar transition state it would be more likely that it is a true coarctate cyclization.

### Cartesian Coordinates of Stationary Points

**1**

B3LYP/6-31G\* = -551.816091083 au

B3LYP/6-31G\* Zero Point Corrected Energy = -551.623981 au

NIMAG = 0

|   |             |             |             |
|---|-------------|-------------|-------------|
| N | 0.67959700  | 0.19300800  | -0.10283600 |
| C | -0.63690200 | -0.31174300 | -0.05496700 |
| C | -3.32844100 | -1.12964500 | 0.02779900  |
| C | -1.67150400 | 0.65383800  | 0.02564800  |
| C | -0.97412700 | -1.67453500 | -0.10245300 |
| C | -2.30332400 | -2.07872300 | -0.05849800 |
| C | -3.01116700 | 0.22307000  | 0.06817600  |
| C | -1.38450500 | 2.05306300  | 0.06970100  |
| H | -0.17496400 | -2.40343300 | -0.17666300 |
| H | -2.54414000 | -3.13800700 | -0.09768300 |
| H | -3.79467000 | 0.97178500  | 0.13195400  |
| H | -4.36759700 | -1.44489600 | 0.05782300  |
| N | 1.57761200  | -0.69762300 | 0.01305900  |
| N | 2.81865100  | -0.23022300 | -0.11446100 |
| C | -1.21268200 | 3.25037000  | 0.11150900  |
| H | -1.04077200 | 4.30173500  | 0.14606900  |
| C | 3.07594000  | 1.19762000  | -0.23548600 |
| H | 2.49093500  | 1.60808600  | -1.06176600 |
| H | 2.78038200  | 1.73361600  | 0.67654500  |
| H | 4.14310100  | 1.33818500  | -0.42074300 |
| C | 3.87272300  | -1.13344900 | 0.30591200  |
| H | 3.47068100  | -2.14763700 | 0.29248900  |
| H | 4.72106500  | -1.06924400 | -0.38396100 |
| H | 4.22888900  | -0.90551600 | 1.32154900  |

**1 reactive conf.**

B3LYP/6-31G\* = -551.812461679 au

B3LYP/6-31G\* Zero Point Corrected Energy = -551.62057 au

NIMAG = 0

|   |             |             |             |
|---|-------------|-------------|-------------|
| N | -0.59636400 | -0.86559400 | -0.23862300 |
| C | 0.77030000  | -0.55898800 | -0.07092000 |
| C | 3.55564800  | -0.24223900 | 0.21590500  |
| C | 1.33604900  | 0.74516800  | -0.06070100 |
| C | 1.62160500  | -1.67014000 | 0.02441700  |
| C | 2.99530800  | -1.52226000 | 0.17782900  |
| C | 2.73232100  | 0.87077900  | 0.08856000  |
| C | 0.57962900  | 1.94322900  | -0.25377200 |

|   |             |             |             |
|---|-------------|-------------|-------------|
| H | 1.16473100  | -2.65437600 | -0.01317000 |
| H | 3.62785300  | -2.40161800 | 0.26397700  |
| H | 3.15776800  | 1.86971200  | 0.09201500  |
| H | 4.62819900  | -0.11240100 | 0.32910900  |
| N | -1.38265300 | -0.00694800 | 0.26913200  |
| N | -2.66994700 | -0.23773900 | 0.02737900  |
| C | 0.05005300  | 3.01619400  | -0.43979600 |
| H | -0.45148200 | 3.94305300  | -0.59918900 |
| C | -3.60091400 | 0.53594500  | 0.82683700  |
| H | -3.06452900 | 1.40333800  | 1.21391600  |
| H | -4.44050400 | 0.87200200  | 0.20854800  |
| H | -3.99854300 | -0.04536200 | 1.67186600  |
| C | -3.10994100 | -1.43329200 | -0.67520300 |
| H | -2.57726700 | -1.51778200 | -1.62563900 |
| H | -2.89944500 | -2.34045600 | -0.09237400 |
| H | -4.18437800 | -1.35052100 | -0.85321400 |

### 1 pericyclic prod

B3LYP/6-31G\* = -551.792314552 au

B3LYP/6-31G\* Zero Point Corrected Energy = -551.596655 au

NIMAG = 0

|   |             |             |             |
|---|-------------|-------------|-------------|
| N | 0.52266000  | -0.69031700 | 0.00010300  |
| C | -0.80867600 | -0.44677500 | -0.00049600 |
| C | -3.57863800 | -0.06670100 | 0.01126800  |
| C | -1.33173700 | 0.89384800  | -0.00927500 |
| C | -1.67594900 | -1.57854500 | 0.01196800  |
| C | -3.03356300 | -1.38205900 | 0.01734500  |
| C | -2.75247300 | 1.03164000  | -0.00131600 |
| H | 1.70156500  | 2.35747100  | -0.05290200 |
| H | -1.23665400 | -2.57177100 | 0.01691800  |
| H | -3.70464700 | -2.23692500 | 0.02653000  |
| H | -3.14350800 | 2.04464200  | -0.00708100 |
| H | -4.65822300 | 0.05846300  | 0.01641000  |
| N | 1.28588400  | 0.37121000  | -0.01764200 |
| C | 0.86033100  | 1.66848300  | -0.03362100 |
| N | 2.70124600  | 0.13453800  | -0.01476300 |
| C | -0.48795500 | 2.04923500  | -0.02625800 |
| C | 3.09536600  | -0.51491000 | 1.24113400  |
| H | 4.18708600  | -0.57909900 | 1.24867700  |
| H | 2.77918300  | 0.10979800  | 2.08077500  |
| H | 2.67054700  | -1.52244200 | 1.35572000  |
| C | 3.08570400  | -0.63926700 | -1.20103300 |
| H | 2.66895700  | -1.65612600 | -1.20600300 |
| H | 2.75482100  | -0.10714500 | -2.09688600 |

H 4.17788100 -0.69456800 -1.21434600

### 1 pericyclic TS

B3LYP/6-31G\* = -551.764712103 au

B3LYP/6-31G\* Zero Point Corrected Energy = -551.572291 au

NIMAG = 1

|   |             |             |             |
|---|-------------|-------------|-------------|
| N | 0.48817200  | -0.72575400 | 0.03890200  |
| C | -0.86576300 | -0.40396700 | 0.11608000  |
| C | -3.63999700 | -0.05729500 | -0.03900400 |
| C | -1.39936100 | 0.89916900  | -0.09560600 |
| C | -1.73074300 | -1.50671300 | 0.27625300  |
| C | -3.10340000 | -1.33101500 | 0.21909300  |
| C | -2.79752900 | 1.03299200  | -0.20581500 |
| H | 1.66099400  | 2.52697300  | 0.04097500  |
| H | -1.29085200 | -2.48529000 | 0.44659300  |
| H | -3.76481800 | -2.18178700 | 0.35823900  |
| H | -3.19632900 | 2.02570400  | -0.39332600 |
| H | -4.71697800 | 0.07258900  | -0.10384500 |
| N | 1.35699400  | 0.19980300  | 0.11356700  |
| C | 0.76824600  | 1.94198400  | -0.08026700 |
| N | 2.62961000  | -0.17303700 | -0.23846800 |
| C | -0.50167700 | 2.01777700  | -0.19408500 |
| C | 3.65477800  | 0.44886900  | 0.59382700  |
| H | 4.60901300  | 0.41571000  | 0.06131300  |
| H | 3.39694300  | 1.49160100  | 0.78287400  |
| H | 3.76789000  | -0.06237100 | 1.56253300  |
| C | 2.85691300  | -1.56764000 | -0.59922300 |
| H | 2.70721300  | -2.25056700 | 0.24970100  |
| H | 2.16778000  | -1.85617200 | -1.39409400 |
| H | 3.88691000  | -1.64843900 | -0.95648500 |

### 1 syn product

B3LYP/6-31G\* = -551.773463245 au

B3LYP/6-31G\* Zero Point Corrected Energy = -551.579031 au

NIMAG = 0

|   |            |             |            |
|---|------------|-------------|------------|
| H | 4.21868500 | -1.53893200 | 0.20042500 |
| C | 3.31335600 | -0.94311500 | 0.12843300 |
| C | 2.07555700 | -1.57044400 | 0.11924300 |
| C | 3.41717400 | 0.46322700  | 0.04469100 |

|   |             |             |             |
|---|-------------|-------------|-------------|
| C | 2.29057200  | 1.27372200  | -0.04446000 |
| H | 4.40336800  | 0.91951400  | 0.05002200  |
| H | 1.97501700  | -2.64929400 | 0.18538900  |
| C | 1.03527200  | 0.65589500  | -0.05940700 |
| C | 0.94434300  | -0.74748400 | 0.02437900  |
| H | 2.37908500  | 2.35487700  | -0.10664600 |
| N | -0.37603500 | -1.15455700 | 0.01053200  |
| C | -0.31909000 | 1.16280800  | -0.14544100 |
| N | -2.44973800 | -0.19115800 | -0.24018200 |
| N | -1.08818500 | -0.07266700 | -0.07146200 |
| C | -0.91337600 | 2.39265700  | -0.26058400 |
| H | -0.10638300 | 3.14306000  | -0.35020900 |
| C | -3.26027600 | 0.68329100  | 0.62446200  |
| H | -3.22822300 | 0.34915400  | 1.67347400  |
| H | -2.88517700 | 1.70221800  | 0.52056300  |
| H | -4.28887100 | 0.62555500  | 0.26040300  |
| C | -2.90897100 | -1.57372900 | -0.31392200 |
| H | -3.97608700 | -1.53216500 | -0.54286100 |
| H | -2.38456100 | -2.10091900 | -1.11237300 |
| H | -2.75650700 | -2.12537000 | 0.62523300  |

### 1 syn TS

B3LYP/6-31G\* = -551.763911839 au

B3LYP/6-31G\* Zero Point Corrected Energy = -551.571807 au

NIMAG = 1

|   |             |             |             |
|---|-------------|-------------|-------------|
| H | 4.17107800  | -1.66581200 | 0.15015800  |
| C | 3.29786500  | -1.02214300 | 0.09559800  |
| C | 2.02329100  | -1.58351300 | 0.08739600  |
| C | 3.46175400  | 0.37111200  | 0.03287600  |
| C | 2.36037600  | 1.22371900  | -0.03124700 |
| H | 4.46328900  | 0.79254800  | 0.03248300  |
| H | 1.86917600  | -2.65707500 | 0.13828100  |
| C | 1.07395400  | 0.67310800  | -0.04840600 |
| C | 0.92653600  | -0.72350900 | 0.01564300  |
| H | 2.49031900  | 2.30118800  | -0.07731600 |
| N | -0.40415300 | -1.15666400 | -0.00626000 |
| C | -0.17835100 | 1.38432900  | -0.11584400 |
| N | -2.46299600 | -0.27906900 | -0.15369000 |
| N | -1.14682500 | -0.12353400 | 0.02391200  |

|   |             |             |             |
|---|-------------|-------------|-------------|
| C | -0.81110300 | 2.51002700  | -0.18855200 |
| H | -0.25104500 | 3.42677200  | -0.37337200 |
| C | -3.31538700 | 0.75096100  | 0.44176600  |
| H | -3.50994000 | 0.53821300  | 1.50325100  |
| H | -2.80528000 | 1.71315000  | 0.33252700  |
| H | -4.26335500 | 0.76127200  | -0.10227200 |
| C | -2.96681600 | -1.64163600 | -0.25490700 |
| H | -4.03367300 | -1.57626900 | -0.47768600 |
| H | -2.44883700 | -2.17050800 | -1.05776000 |
| H | -2.81662800 | -2.20335100 | 0.67803900  |

### 1 anti product

B3LYP/6-31G\* = -551.768676909 au

B3LYP/6-31G\* Zero Point Corrected Energy = -551.574842 au

NIMAG = 0

|   |             |             |             |
|---|-------------|-------------|-------------|
| H | 4.16385500  | -1.61652900 | 0.18977700  |
| C | 3.27094800  | -1.00172800 | 0.12029500  |
| C | 2.02579100  | -1.60126000 | 0.11350300  |
| C | 3.41226900  | 0.40938400  | 0.03754300  |
| C | 2.31474000  | 1.24968800  | -0.05347300 |
| H | 4.41249300  | 0.83425700  | 0.04590500  |
| H | 1.90134400  | -2.67776400 | 0.17493400  |
| C | 1.04191900  | 0.66017700  | -0.05958800 |
| C | 0.90686300  | -0.74874900 | 0.02512600  |
| H | 2.41260300  | 2.32848300  | -0.12014800 |
| N | -0.41585900 | -1.11084900 | 0.02083400  |
| C | -0.28670000 | 1.19557400  | -0.15704300 |
| N | -2.47918200 | 0.02268700  | -0.11996900 |
| N | -1.08058500 | 0.00893400  | -0.09406800 |
| C | -0.68943600 | 2.51569800  | -0.31065500 |
| H | -1.79161200 | 2.53150500  | -0.41351200 |
| C | -3.02019900 | 0.04865500  | 1.24625800  |
| H | -2.81698800 | -0.88434600 | 1.79500800  |
| H | -2.58505700 | 0.89137300  | 1.78720700  |
| H | -4.10100400 | 0.19834000  | 1.17651500  |
| C | -3.01904600 | -1.07011600 | -0.93350300 |
| H | -4.09473100 | -0.89845500 | -1.03036100 |
| H | -2.56734200 | -1.03303700 | -1.92751200 |
| H | -2.84707500 | -2.06317000 | -0.49618000 |

### 1 anti TS

B3LYP/6-31G\* = -551.762404026 au

B3LYP/6-31G\* Zero Point Corrected Energy = -551.570249 au

NIMAG = 1

|   |             |             |             |
|---|-------------|-------------|-------------|
| H | 4.17243800  | -1.64445500 | 0.20600300  |
| C | 3.29278700  | -1.01117800 | 0.13571900  |
| C | 2.02765400  | -1.58589500 | 0.11201200  |
| C | 3.44666300  | 0.38783700  | 0.06358800  |
| C | 2.34670300  | 1.23678400  | -0.02159200 |
| H | 4.44763400  | 0.81107000  | 0.06888200  |
| H | 1.88224300  | -2.66050200 | 0.16491400  |
| C | 1.06680000  | 0.67257300  | -0.04480300 |
| C | 0.92691400  | -0.72664200 | 0.02415200  |
| H | 2.45644100  | 2.31462400  | -0.08572700 |
| N | -0.40384000 | -1.13837300 | -0.01822500 |
| C | -0.21512800 | 1.32461700  | -0.15749800 |
| N | -2.46832400 | -0.18767100 | -0.18918400 |
| N | -1.12466700 | -0.08521000 | 0.01625100  |
| C | -0.61139200 | 2.55180100  | -0.41843700 |
| H | -1.67053600 | 2.81410700  | -0.42426600 |
| C | -3.25340700 | 0.59056400  | 0.77443000  |
| H | -3.36748900 | 0.05199900  | 1.72792800  |
| H | -2.75557000 | 1.54069900  | 0.95768400  |
| H | -4.24174000 | 0.77761100  | 0.34694400  |
| C | -2.96748400 | -1.52935300 | -0.46563000 |
| H | -4.02779800 | -1.43425600 | -0.71293200 |
| H | -2.42900900 | -1.95190400 | -1.31559200 |
| H | -2.84944700 | -2.20686000 | 0.39261800  |

### 4

B3LYP/6-31G\* = -779.6954003 au

B3LYP/6-31G\* Zero Point Corrected Energy = -779.459158 au

NIMAG = 0

|   |             |             |             |
|---|-------------|-------------|-------------|
| N | -1.42516100 | -0.49407600 | -0.12850700 |
| C | -1.50716100 | 0.90743800  | -0.06157900 |
| C | -1.44748700 | 3.72424000  | 0.03593800  |
| C | -0.26740500 | 1.59898700  | -0.01693800 |

|   |             |             |             |
|---|-------------|-------------|-------------|
| C | -2.69952000 | 1.64975800  | -0.06343100 |
| C | -2.66810600 | 3.03863000  | -0.01213100 |
| C | -0.25802700 | 3.00687600  | 0.03273800  |
| C | 0.96072900  | 0.88132100  | -0.00963100 |
| H | -3.64263100 | 1.11688500  | -0.10895900 |
| H | -3.60186200 | 3.59518500  | -0.01604700 |
| H | 0.69807600  | 3.51972200  | 0.06874300  |
| H | -1.42866900 | 4.80955400  | 0.07073000  |
| N | -2.53398300 | -1.08961200 | 0.06493800  |
| N | -2.45540100 | -2.40609600 | -0.06457300 |
| C | 2.02738400  | 0.30000500  | 0.00285400  |
| C | 3.22796200  | -0.49195300 | 0.01830400  |
| O | 3.25793900  | -1.70789900 | 0.00737100  |
| O | 4.33414400  | 0.28974000  | 0.04800100  |
| C | 5.57799600  | -0.42751200 | 0.06722300  |
| H | 6.35358200  | 0.33876200  | 0.08893700  |
| H | 5.64245900  | -1.06530500 | 0.95318400  |
| H | 5.67817000  | -1.05116600 | -0.82541800 |
| C | -3.62428400 | -3.16144200 | 0.34283300  |
| H | -4.45546600 | -2.46233700 | 0.44504300  |
| H | -3.87356400 | -3.91539800 | -0.41229800 |
| H | -3.46300000 | -3.66881300 | 1.30440900  |
| C | -1.18287300 | -3.06784000 | -0.32503400 |
| H | -0.74044200 | -2.67785300 | -1.24578600 |
| H | -0.46822300 | -2.87708300 | 0.48457200  |
| H | -1.36852700 | -4.13945200 | -0.41997000 |

#### 4 reactive conf.

B3LYP/6-31G\* = -779.6938541 au

B3LYP/6-31G\* Zero Point Corrected Energy = -779.45747 au

NIMAG = 0

|   |             |             |             |
|---|-------------|-------------|-------------|
| N | -1.70931800 | 1.29508700  | -0.22364100 |
| C | -2.15671700 | -0.02814300 | -0.06626300 |
| C | -3.23609300 | -2.62825600 | 0.12172900  |
| C | -1.29316600 | -1.15643400 | 0.04294500  |
| C | -3.54162900 | -0.24036100 | -0.11923200 |
| C | -4.07844100 | -1.51865700 | -0.01489500 |
| C | -1.85957100 | -2.44473100 | 0.14106000  |
| C | 0.12201700  | -1.03137100 | -0.01411000 |
| H | -4.18198000 | 0.62920500  | -0.23046600 |
| H | -5.15647400 | -1.65301100 | -0.04139600 |
| H | -1.19130800 | -3.29676300 | 0.22063600  |
| H | -3.65178900 | -3.62866600 | 0.19738900  |
| N | -0.67959800 | 1.55864700  | 0.47850300  |
| N | -0.17447000 | 2.76687000  | 0.29394400  |
| C | 1.33414800  | -0.98322500 | -0.10176700 |
| C | 2.74471900  | -0.72839900 | -0.17818800 |
| O | 3.23908700  | 0.36475700  | -0.39719000 |
| O | 3.46987300  | -1.85230100 | 0.02399500  |
| C | 4.89401800  | -1.67326300 | -0.02996700 |



|   |             |             |             |
|---|-------------|-------------|-------------|
| H | 5.31645900  | -2.66188500 | 0.15199800  |
| H | 5.19896300  | -1.29895700 | -1.01103600 |
| H | 5.22372100  | -0.96703800 | 0.73701100  |
| C | 1.14849800  | 2.96310100  | 0.87423700  |
| H | 1.94261600  | 2.63945800  | 0.18927500  |
| H | 1.28080900  | 4.01888500  | 1.12735800  |
| H | 1.21056600  | 2.36099700  | 1.78190300  |
| C | -0.64657700 | 3.62064100  | -0.78819500 |
| H | -0.46067200 | 3.15524500  | -1.76540000 |
| H | -1.72369600 | 3.77720600  | -0.69136100 |
| H | -0.12242000 | 4.57603300  | -0.72612600 |

#### 4 pericyclic prod

B3LYP/6-31G\* = -779.6611048 au

B3LYP/6-31G\* Zero Point Corrected Energy = -779.422727 au

NIMAG = 0

|   |             |             |             |
|---|-------------|-------------|-------------|
| N | -0.86756800 | 1.29965400  | -0.05364900 |
| C | -1.89605900 | 0.42240700  | 0.00570900  |
| C | -4.09371800 | -1.30276400 | -0.00338800 |
| C | -1.67248000 | -0.99754400 | 0.02836700  |
| C | -3.21470200 | 0.96308800  | 0.00094400  |
| C | -4.28750200 | 0.10741500  | 0.00186600  |
| C | -2.82605700 | -1.83539200 | 0.00458300  |
| H | -3.33675800 | 2.04208300  | -0.00378100 |
| H | -5.29841600 | 0.50614000  | 0.00164400  |
| H | -2.65373300 | -2.90733900 | 0.00917700  |
| H | -4.96232300 | -1.95581500 | -0.01076200 |
| N | 0.33077900  | 0.78248500  | -0.02258900 |
| C | 0.61369700  | -0.55561100 | 0.07880200  |
| N | 1.42247100  | 1.70040300  | -0.15947400 |
| C | -0.35975600 | -1.55785800 | 0.06742800  |
| C | 2.06597800  | -0.89047800 | 0.31203500  |
| O | 2.66596900  | -0.63288400 | 1.33617900  |
| O | 2.58324700  | -1.57998300 | -0.71449600 |
| C | 3.92759200  | -2.05139700 | -0.52004600 |
| H | 3.97329000  | -2.72740400 | 0.33767800  |
| H | 4.18551100  | -2.57888200 | -1.43855200 |
| H | 4.60840500  | -1.21271600 | -0.35120700 |
| C | 1.21581500  | 2.59281500  | -1.30476100 |
| H | 2.14217400  | 3.15883600  | -1.43686300 |
| H | 1.04566100  | 1.99127400  | -2.20156500 |

|   |            |            |             |
|---|------------|------------|-------------|
| H | 0.37833300 | 3.28984100 | -1.17009200 |
| C | 1.62913900 | 2.41385100 | 1.10849700  |
| H | 0.77095000 | 3.04663700 | 1.37928500  |
| H | 1.82492400 | 1.68019300 | 1.89233300  |
| H | 2.51679300 | 3.04110900 | 0.98900200  |

#### 4 pericyclic TS

B3LYP/6-31G\* = -779.6402139 au

B3LYP/6-31G\* Zero Point Corrected Energy = -779.404093 au

NIMAG = 1

|   |             |             |             |
|---|-------------|-------------|-------------|
| N | 0.95922200  | 1.27808700  | -0.22609700 |
| C | 1.87022500  | 0.25128800  | -0.28724300 |
| C | 3.95964700  | -1.57277700 | 0.14337800  |
| C | 1.58802900  | -1.05570700 | 0.21947000  |
| C | 3.19448200  | 0.59004400  | -0.65280300 |
| C | 4.21538100  | -0.32139000 | -0.45632800 |
| C | 2.66559100  | -1.92770100 | 0.48456000  |
| H | 3.38505100  | 1.57164800  | -1.07619400 |
| H | 5.22973300  | -0.06281500 | -0.74805900 |
| H | 2.44265300  | -2.90139500 | 0.91077000  |
| H | 4.77930700  | -2.26359400 | 0.31910300  |
| N | -0.30851600 | 1.08842900  | -0.16359300 |
| C | -0.80525400 | -0.64186500 | 0.17924500  |
| N | -0.98042800 | 2.15490500  | 0.39065900  |
| C | 0.22206400  | -1.38968100 | 0.38466200  |
| C | -2.20449800 | -0.88947800 | -0.17756200 |
| O | -2.92461100 | -0.18697600 | -0.86466500 |
| O | -2.62108000 | -2.05612400 | 0.36072100  |
| C | -3.96768100 | -2.42810300 | 0.03021900  |
| H | -4.08251800 | -2.54934100 | -1.05049700 |
| H | -4.13672800 | -3.37598300 | 0.54204700  |
| H | -4.67549700 | -1.67096600 | 0.37895300  |
| C | -0.18012100 | 3.18822900  | 1.04012800  |
| H | -0.87516100 | 3.82938900  | 1.58990000  |
| H | 0.52279400  | 2.72839900  | 1.73726800  |
| H | 0.38895900  | 3.79876400  | 0.32513200  |
| C | -2.09077500 | 2.66455400  | -0.41855400 |
| H | -1.72671100 | 3.38815800  | -1.16506300 |
| H | -2.57842700 | 1.83045000  | -0.91642800 |

H -2.80241300 3.16764700 0.24279600

#### 4 syn product

B3LYP/6-31G\* = -779.664807 au

B3LYP/6-31G\* Zero Point Corrected Energy = -779.426673 au

NIMAG = 0

|   |             |             |             |
|---|-------------|-------------|-------------|
| H | 1.52298800  | 4.68550100  | -0.03149700 |
| C | 1.17096700  | 3.65855300  | 0.00095600  |
| C | 2.07515400  | 2.61658900  | -0.14889000 |
| C | -0.20343900 | 3.40619900  | 0.20510400  |
| C | -0.71097700 | 2.11173800  | 0.26189400  |
| H | -0.88020600 | 4.24753100  | 0.32584200  |
| H | 3.13701500  | 2.78880400  | -0.29319600 |
| C | 0.18703000  | 1.05229300  | 0.09298800  |
| C | 1.55887300  | 1.31454500  | -0.09510500 |
| H | -1.76391300 | 1.92626000  | 0.44497600  |
| N | 2.27795400  | 0.13784800  | -0.19056700 |
| C | 0.03813100  | -0.38910300 | 0.08560600  |
| N | 1.83364800  | -2.12601000 | -0.23800000 |
| N | 1.41976100  | -0.82381800 | -0.05702500 |
| C | -0.99175100 | -1.26684300 | 0.15095200  |
| C | -2.35223000 | -0.81383900 | 0.26601000  |
| O | -2.88875900 | -0.53971600 | 1.33412100  |
| O | -3.02024700 | -0.84042300 | -0.92104400 |
| C | -4.42066600 | -0.54579700 | -0.83514000 |
| H | -4.58918500 | 0.46811700  | -0.45910300 |
| H | -4.80036700 | -0.63766400 | -1.85395200 |
| H | -4.92904200 | -1.25301600 | -0.17365200 |
| C | 1.43399800  | -3.04149100 | 0.84460000  |
| H | 1.98473200  | -2.83015500 | 1.77393500  |
| H | 0.35991300  | -2.95167100 | 0.99766700  |
| H | 1.66780200  | -4.05440900 | 0.50925100  |
| C | 3.23136400  | -2.23895200 | -0.64232300 |
| H | 3.40618900  | -3.29536900 | -0.85788300 |
| H | 3.40664200  | -1.64981300 | -1.54386700 |
| H | 3.93121900  | -1.90249300 | 0.13610200  |

#### 4 syn TS

B3LYP/6-31G\* = -779.654868 au

B3LYP/6-31G\* Zero Point Corrected Energy = -779.418723 au  
NIMAG = 1

|   |             |             |             |
|---|-------------|-------------|-------------|
| H | -3.33777500 | -3.86085900 | -0.13798800 |
| C | -2.59633700 | -3.06975200 | -0.07485500 |
| C | -2.99483800 | -1.73915000 | -0.18126700 |
| C | -1.24432200 | -3.39704800 | 0.11658300  |
| C | -0.26780000 | -2.40540000 | 0.20851700  |
| H | -0.95261600 | -4.44064800 | 0.19396500  |
| H | -4.03476800 | -1.46097000 | -0.32137800 |
| C | -0.65494000 | -1.06721500 | 0.08819600  |
| C | -2.01216300 | -0.75251500 | -0.09481600 |
| H | 0.77609900  | -2.65782600 | 0.36701200  |
| N | -2.27330900 | 0.62078800  | -0.18242100 |
| C | 0.19539100  | 0.09474800  | 0.14786600  |
| N | -1.13890300 | 2.56035400  | -0.14560800 |
| N | -1.18734400 | 1.23787800  | 0.05398000  |
| C | 1.38890000  | 0.54656100  | 0.25157800  |
| C | 2.70665100  | -0.00875000 | 0.31515100  |
| O | 3.24804100  | -0.41501700 | 1.33266600  |
| O | 3.33341600  | 0.03461500  | -0.89773400 |
| C | 4.68325800  | -0.44531400 | -0.88972100 |
| H | 4.72708200  | -1.49615600 | -0.58759600 |
| H | 5.03825600  | -0.33218500 | -1.91554200 |
| H | 5.30380900  | 0.14043500  | -0.20516600 |
| C | -0.17499100 | 3.28862200  | 0.68106500  |
| H | -0.58692400 | 3.50336900  | 1.67758600  |
| H | 0.72865100  | 2.68387800  | 0.77079400  |
| H | 0.06013800  | 4.22937000  | 0.17763400  |
| C | -2.38038400 | 3.22403000  | -0.52108800 |
| H | -2.13982900 | 4.26850900  | -0.72888000 |
| H | -2.79542100 | 2.75181200  | -1.41375700 |
| H | -3.13201300 | 3.16842600  | 0.27895600  |

#### 4 anti product

B3LYP/6-31G\* = -779.6635691 au

B3LYP/6-31G\* Zero Point Corrected Energy = -779.425541 au  
NIMAG = 0

|   |             |             |             |
|---|-------------|-------------|-------------|
| H | -5.45373200 | -0.29112400 | -0.26837100 |
| C | -4.37519200 | -0.37894200 | -0.17511300 |

|   |             |             |             |
|---|-------------|-------------|-------------|
| C | -3.58439200 | 0.75270400  | -0.26955400 |
| C | -3.80497500 | -1.65885400 | 0.04180300  |
| C | -2.43484500 | -1.83801400 | 0.16913800  |
| H | -4.46434100 | -2.51993700 | 0.10865700  |
| H | -4.00353700 | 1.73984500  | -0.43601400 |
| C | -1.62057400 | -0.70264800 | 0.07895800  |
| C | -2.19564700 | 0.57192800  | -0.13512000 |
| H | -1.99260000 | -2.81582900 | 0.33099700  |
| N | -1.22493000 | 1.54532700  | -0.16555500 |
| C | -0.19566300 | -0.50375000 | 0.13238100  |
| N | 1.11840100  | 1.61257200  | -0.00629100 |
| N | -0.09185700 | 0.92262000  | -0.01730600 |
| C | 0.79888100  | -1.43125200 | 0.21206800  |
| C | 2.20412100  | -1.17864800 | 0.25160900  |
| O | 2.80357100  | -0.97586700 | 1.30795700  |
| O | 2.82849100  | -1.34508900 | -0.94282700 |
| C | 4.25883600  | -1.26339800 | -0.89590400 |
| H | 4.67107800  | -2.00391500 | -0.20489300 |
| H | 4.59491000  | -1.46528000 | -1.91421600 |
| H | 4.58577200  | -0.26759700 | -0.58088400 |
| C | 1.54709800  | 1.90320900  | 1.37451400  |
| H | 0.85173800  | 2.59428200  | 1.87552000  |
| H | 1.64079400  | 0.97038800  | 1.93094200  |
| H | 2.53761000  | 2.36079900  | 1.31854500  |
| C | 1.08260700  | 2.79856000  | -0.86520400 |
| H | 2.10781400  | 3.17161600  | -0.93142800 |
| H | 0.74507800  | 2.51189500  | -1.86362100 |
| H | 0.43008600  | 3.59350100  | -0.47966900 |

#### 4 anti TS

B3LYP/6-31G\* = -779.6565061 au

B3LYP/6-31G\* Zero Point Corrected Energy = -779.420238 au

NIMAG = 1

|   |             |             |             |
|---|-------------|-------------|-------------|
| H | -5.42156000 | -0.73590900 | -0.25518400 |
| C | -4.34002000 | -0.73033800 | -0.15712300 |
| C | -3.64179000 | 0.46841400  | -0.26791200 |
| C | -3.65665100 | -1.93695700 | 0.07861400  |
| C | -2.26952400 | -1.97190000 | 0.21317800  |
| H | -4.22200400 | -2.86191600 | 0.15213000  |
| H | -4.14504400 | 1.41338000  | -0.44726700 |
| C | -1.55744400 | -0.77522200 | 0.10149800  |
| C | -2.25247500 | 0.42421700  | -0.13186400 |
| H | -1.73698200 | -2.90153100 | 0.38720700  |
| N | -1.41526000 | 1.54298500  | -0.19868200 |

|   |             |             |             |
|---|-------------|-------------|-------------|
| C | -0.13139600 | -0.56024200 | 0.16151300  |
| N | 0.80497600  | 2.01040300  | -0.06184900 |
| N | -0.23373900 | 1.15211600  | 0.06159100  |
| C | 0.94404700  | -1.27523700 | 0.15112400  |
| C | 2.35589900  | -1.19576100 | 0.24436600  |
| O | 2.98307800  | -1.09183300 | 1.29745200  |
| O | 2.96618300  | -1.32792200 | -0.96935300 |
| C | 4.39747500  | -1.34017700 | -0.92506700 |
| H | 4.76392700  | -2.18290900 | -0.33161700 |
| H | 4.71908600  | -1.43967800 | -1.96319100 |
| H | 4.78977800  | -0.41383100 | -0.49397100 |
| C | 1.74720600  | 1.98464500  | 1.06728900  |
| H | 1.36356400  | 2.58746400  | 1.90415000  |
| H | 1.92375300  | 0.96432000  | 1.40376900  |
| H | 2.69456400  | 2.40767000  | 0.72542200  |
| C | 0.47076300  | 3.33677500  | -0.56918300 |
| H | 1.41198000  | 3.86563700  | -0.73501500 |
| H | -0.07069500 | 3.24138400  | -1.51210400 |
| H | -0.15283300 | 3.90611400  | 0.13486900  |

Crystal Structure Data for 10a (see cif file for full data)

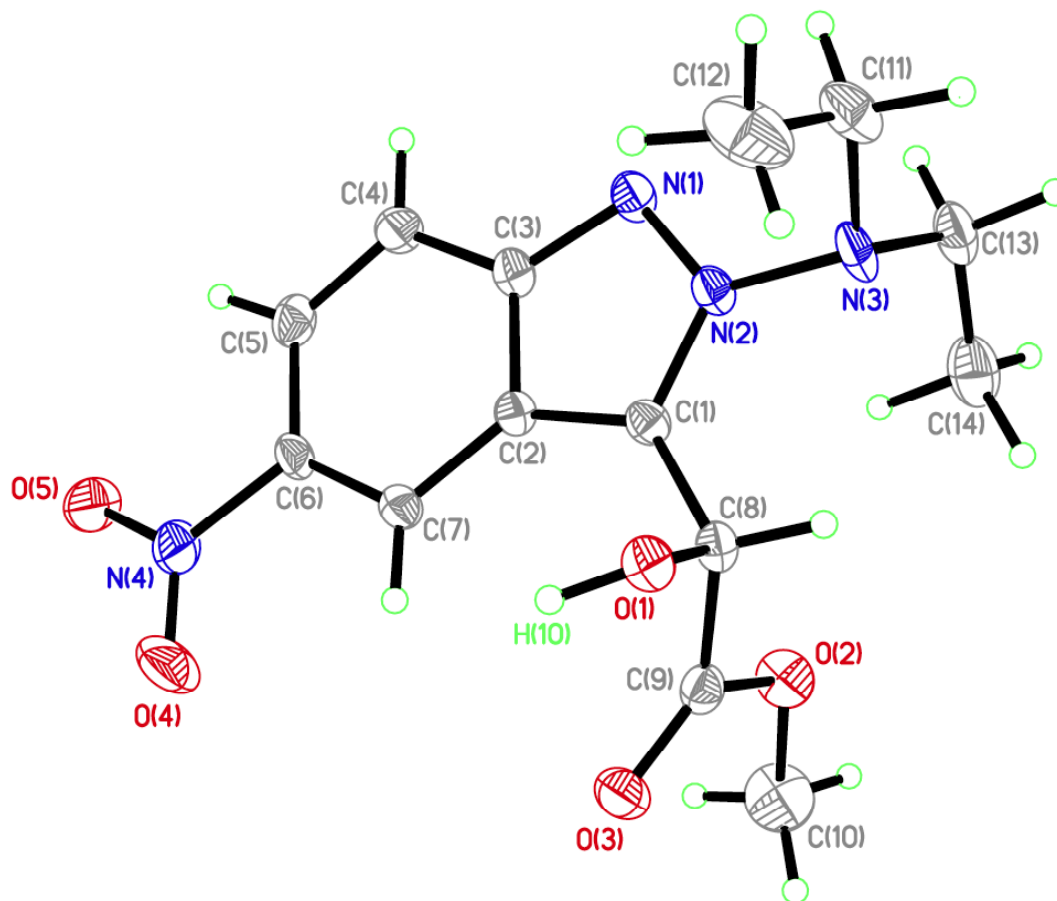

Figure S1. X-ray crystal structure of 10a; ellipsoids drawn at the 50% probability level.

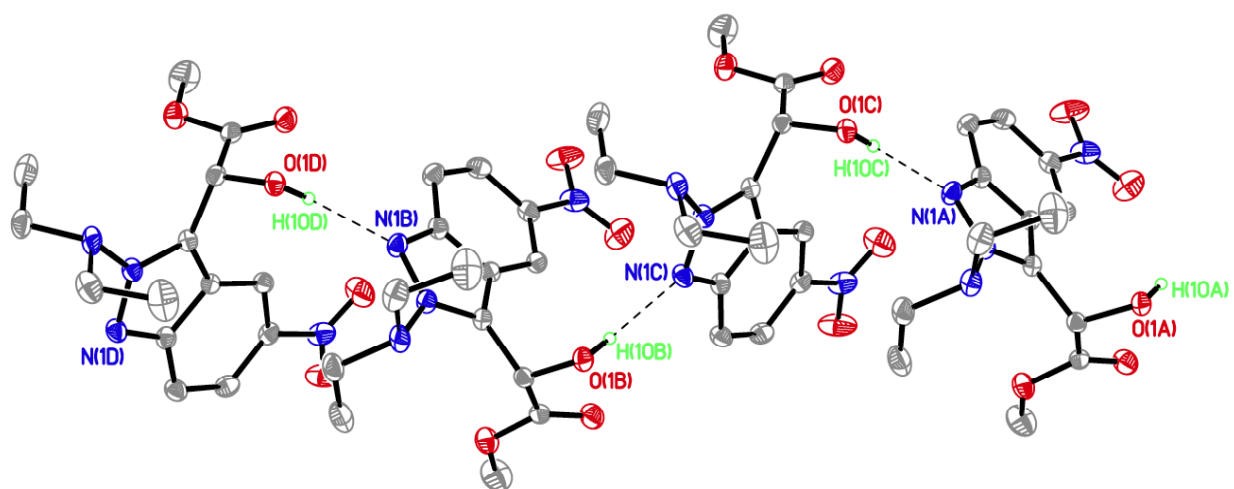

Figure S2. Intermolecular H-bonding in crystal lattice of 10a.

Table 1. Crystal data and structure refinement for **10a**.

|                                   |                                                               |                 |
|-----------------------------------|---------------------------------------------------------------|-----------------|
| Empirical formula                 | C <sub>14</sub> H <sub>18</sub> N <sub>4</sub> O <sub>5</sub> |                 |
| Formula weight                    | 322.32                                                        |                 |
| Temperature                       | 173(2) K                                                      |                 |
| Wavelength                        | 0.71073 Å                                                     |                 |
| Crystal system                    | Monoclinic                                                    |                 |
| Space group                       | P2(1)/c                                                       |                 |
| Unit cell dimensions              | a = 9.739(2) Å                                                | α = 90°.        |
|                                   | b = 14.681(3) Å                                               | β = 92.569(4)°. |
|                                   | c = 11.462(3) Å                                               | γ = 90°.        |
| Volume                            | 1637.0(6) Å <sup>3</sup>                                      |                 |
| Z                                 | 4                                                             |                 |
| Density (calculated)              | 1.308 Mg/m <sup>3</sup>                                       |                 |
| Absorption coefficient            | 0.101 mm <sup>-1</sup>                                        |                 |
| F(000)                            | 680                                                           |                 |
| Crystal size                      | 0.35 x 0.07 x 0.05 mm <sup>3</sup>                            |                 |
| Theta range for data collection   | 2.09 to 25.00°.                                               |                 |
| Index ranges                      | -11 ≤ h ≤ 11, -17 ≤ k ≤ 17, -13 ≤ l ≤ 13                      |                 |
| Reflections collected             | 13040                                                         |                 |
| Independent reflections           | 2880 [R(int) = 0.0941]                                        |                 |
| Completeness to theta = 25.00°    | 99.9 %                                                        |                 |
| Absorption correction             | Semi-empirical from equivalents                               |                 |
| Max. and min. transmission        | 0.9950 and 0.9655                                             |                 |
| Refinement method                 | Full-matrix least-squares on F <sup>2</sup>                   |                 |
| Data / restraints / parameters    | 2880 / 0 / 280                                                |                 |
| Goodness-of-fit on F <sup>2</sup> | 0.999                                                         |                 |
| Final R indices [I > 2σ(I)]       | R1 = 0.0546, wR2 = 0.0927                                     |                 |
| R indices (all data)              | R1 = 0.1172, wR2 = 0.1187                                     |                 |
| Largest diff. peak and hole       | 0.186 and -0.199 e.Å <sup>-3</sup>                            |                 |



Table 2. Atomic coordinates ( $\times 10^4$ ) and equivalent isotropic displacement parameters ( $\text{\AA}^2 \times 10^3$ ) for **10a**.  $U(\text{eq})$  is defined as one third of the trace of the orthogonalized  $U^{ij}$  tensor.

|       | x        | y       | z        | $U(\text{eq})$ |
|-------|----------|---------|----------|----------------|
| O(1)  | 13(2)    | 1120(1) | 389(2)   | 34(1)          |
| O(2)  | -2580(2) | 6(1)    | -1401(2) | 45(1)          |
| O(3)  | -2436(2) | 211(1)  | 543(2)   | 46(1)          |
| O(4)  | -5028(3) | 2749(2) | 1491(2)  | 69(1)          |
| O(5)  | -5840(3) | 3952(2) | 624(2)   | 74(1)          |
| N(1)  | -1149(3) | 2901(2) | -2649(2) | 35(1)          |
| N(2)  | -621(2)  | 2096(2) | -2223(2) | 31(1)          |
| N(3)  | 491(3)   | 1658(2) | -2727(2) | 38(1)          |
| N(4)  | -5031(3) | 3308(2) | 697(3)   | 49(1)          |
| C(1)  | -1233(3) | 1771(2) | -1280(2) | 28(1)          |
| C(2)  | -2256(3) | 2398(2) | -1042(2) | 27(1)          |
| C(3)  | -2155(3) | 3086(2) | -1908(2) | 32(1)          |
| C(4)  | -3030(3) | 3854(2) | -1908(3) | 37(1)          |
| C(5)  | -3959(3) | 3901(2) | -1062(3) | 39(1)          |
| C(6)  | -4044(3) | 3206(2) | -215(2)  | 33(1)          |
| C(7)  | -3218(3) | 2462(2) | -177(3)  | 31(1)          |
| C(8)  | -768(3)  | 923(2)  | -655(2)  | 29(1)          |
| C(9)  | -2010(3) | 339(2)  | -410(3)  | 33(1)          |
| C(10) | -3780(5) | -564(4) | -1281(5) | 67(1)          |
| C(11) | 1707(4)  | 2260(3) | -2699(3) | 49(1)          |
| C(12) | 2161(5)  | 2514(5) | -1481(4) | 72(1)          |
| C(13) | 95(4)    | 1344(3) | -3916(3) | 47(1)          |
| C(14) | -1004(5) | 625(3)  | -3905(3) | 57(1)          |

Table 3. Bond lengths [Å] and angles [°] for **10a**.

---

|              |          |
|--------------|----------|
| O(1)-C(8)    | 1.418(3) |
| O(1)-H(10)   | 0.89(4)  |
| O(2)-C(9)    | 1.334(3) |
| O(2)-C(10)   | 1.449(5) |
| O(3)-C(9)    | 1.200(3) |
| O(4)-N(4)    | 1.226(3) |
| O(5)-N(4)    | 1.230(3) |
| N(1)-C(3)    | 1.353(3) |
| N(1)-N(2)    | 1.370(3) |
| N(2)-C(1)    | 1.345(3) |
| N(2)-N(3)    | 1.405(3) |
| N(3)-C(13)   | 1.474(4) |
| N(3)-C(11)   | 1.477(4) |
| N(4)-C(6)    | 1.459(4) |
| C(1)-C(2)    | 1.392(4) |
| C(1)-C(8)    | 1.496(4) |
| C(2)-C(7)    | 1.398(4) |
| C(2)-C(3)    | 1.422(4) |
| C(3)-C(4)    | 1.414(4) |
| C(4)-C(5)    | 1.357(4) |
| C(4)-H(4)    | 0.94(3)  |
| C(5)-C(6)    | 1.413(4) |
| C(5)-H(5)    | 0.94(3)  |
| C(6)-C(7)    | 1.356(4) |
| C(7)-H(7)    | 0.92(2)  |
| C(8)-C(9)    | 1.519(4) |
| C(8)-H(8)    | 0.96(2)  |
| C(10)-H(10A) | 0.94(4)  |
| C(10)-H(10B) | 0.99(4)  |
| C(10)-H(10C) | 0.93(4)  |
| C(11)-C(12)  | 1.492(5) |
| C(11)-H(11A) | 0.98(3)  |
| C(11)-H(11B) | 1.00(3)  |
| C(12)-H(12A) | 0.99(4)  |
| C(12)-H(12B) | 0.92(4)  |
| C(12)-H(12C) | 1.02(4)  |
| C(13)-C(14)  | 1.504(5) |
| C(13)-H(13A) | 1.00(3)  |

|                  |           |
|------------------|-----------|
| C(13)-H(13B)     | 1.03(3)   |
| C(14)-H(14A)     | 0.99(3)   |
| C(14)-H(14B)     | 1.03(4)   |
| C(14)-H(14C)     | 1.07(4)   |
| C(8)-O(1)-H(10)  | 110(3)    |
| C(9)-O(2)-C(10)  | 116.0(3)  |
| C(3)-N(1)-N(2)   | 102.7(2)  |
| C(1)-N(2)-N(1)   | 114.8(2)  |
| C(1)-N(2)-N(3)   | 123.1(2)  |
| N(1)-N(2)-N(3)   | 122.1(2)  |
| N(2)-N(3)-C(13)  | 110.4(2)  |
| N(2)-N(3)-C(11)  | 110.4(3)  |
| C(13)-N(3)-C(11) | 112.5(3)  |
| O(4)-N(4)-O(5)   | 123.0(3)  |
| O(4)-N(4)-C(6)   | 118.9(3)  |
| O(5)-N(4)-C(6)   | 118.1(3)  |
| N(2)-C(1)-C(2)   | 105.7(2)  |
| N(2)-C(1)-C(8)   | 123.0(3)  |
| C(2)-C(1)-C(8)   | 131.3(3)  |
| C(1)-C(2)-C(7)   | 133.8(3)  |
| C(1)-C(2)-C(3)   | 105.1(2)  |
| C(7)-C(2)-C(3)   | 121.1(3)  |
| N(1)-C(3)-C(4)   | 127.9(3)  |
| N(1)-C(3)-C(2)   | 111.7(2)  |
| C(4)-C(3)-C(2)   | 120.4(3)  |
| C(5)-C(4)-C(3)   | 117.5(3)  |
| C(5)-C(4)-H(4)   | 125.1(19) |
| C(3)-C(4)-H(4)   | 117.3(19) |
| C(4)-C(5)-C(6)   | 121.0(3)  |
| C(4)-C(5)-H(5)   | 120.4(17) |
| C(6)-C(5)-H(5)   | 118.6(17) |
| C(7)-C(6)-C(5)   | 123.5(3)  |
| C(7)-C(6)-N(4)   | 117.9(3)  |
| C(5)-C(6)-N(4)   | 118.6(3)  |
| C(6)-C(7)-C(2)   | 116.5(3)  |
| C(6)-C(7)-H(7)   | 119.7(15) |
| C(2)-C(7)-H(7)   | 123.7(15) |
| O(1)-C(8)-C(1)   | 111.9(2)  |
| O(1)-C(8)-C(9)   | 111.2(2)  |

|                     |           |
|---------------------|-----------|
| C(1)-C(8)-C(9)      | 109.4(2)  |
| O(1)-C(8)-H(8)      | 105.5(16) |
| C(1)-C(8)-H(8)      | 109.1(15) |
| C(9)-C(8)-H(8)      | 109.8(15) |
| O(3)-C(9)-O(2)      | 124.7(3)  |
| O(3)-C(9)-C(8)      | 124.6(3)  |
| O(2)-C(9)-C(8)      | 110.7(3)  |
| O(2)-C(10)-H(10A)   | 103(3)    |
| O(2)-C(10)-H(10B)   | 111(2)    |
| H(10A)-C(10)-H(10B) | 113(3)    |
| O(2)-C(10)-H(10C)   | 109(3)    |
| H(10A)-C(10)-H(10C) | 109(4)    |
| H(10B)-C(10)-H(10C) | 111(4)    |
| N(3)-C(11)-C(12)    | 111.9(3)  |
| N(3)-C(11)-H(11A)   | 104.5(19) |
| C(12)-C(11)-H(11A)  | 110.0(19) |
| N(3)-C(11)-H(11B)   | 108.5(17) |
| C(12)-C(11)-H(11B)  | 114.6(17) |
| H(11A)-C(11)-H(11B) | 107(2)    |
| C(11)-C(12)-H(12A)  | 116(3)    |
| C(11)-C(12)-H(12B)  | 111(3)    |
| H(12A)-C(12)-H(12B) | 109(3)    |
| C(11)-C(12)-H(12C)  | 112(2)    |
| H(12A)-C(12)-H(12C) | 100(3)    |
| H(12B)-C(12)-H(12C) | 109(3)    |
| N(3)-C(13)-C(14)    | 111.6(3)  |
| N(3)-C(13)-H(13A)   | 109.6(17) |
| C(14)-C(13)-H(13A)  | 111.2(18) |
| N(3)-C(13)-H(13B)   | 106.0(17) |
| C(14)-C(13)-H(13B)  | 112.1(17) |
| H(13A)-C(13)-H(13B) | 106(2)    |
| C(13)-C(14)-H(14A)  | 111.9(18) |
| C(13)-C(14)-H(14B)  | 112.1(19) |
| H(14A)-C(14)-H(14B) | 102(3)    |
| C(13)-C(14)-H(14C)  | 112(2)    |
| H(14A)-C(14)-H(14C) | 109(3)    |
| H(14B)-C(14)-H(14C) | 109(3)    |

---

Symmetry transformations used to generate equivalent atoms:

Table 4. Anisotropic displacement parameters ( $\text{\AA}^2 \times 10^3$ ) for **10a**. The anisotropic displacement factor exponent takes the form:  $-2\pi^2 [ h^2 a^{*2} U^{11} + \dots + 2 h k a^* b^* U^{12} ]$

|       | U <sup>11</sup> | U <sup>22</sup> | U <sup>33</sup> | U <sup>23</sup> | U <sup>13</sup> | U <sup>12</sup> |
|-------|-----------------|-----------------|-----------------|-----------------|-----------------|-----------------|
| O(1)  | 33(1)           | 39(1)           | 29(1)           | 0(1)            | -2(1)           | 1(1)            |
| O(2)  | 39(2)           | 54(1)           | 40(1)           | -6(1)           | -7(1)           | -7(1)           |
| O(3)  | 53(2)           | 47(1)           | 39(1)           | -3(1)           | 13(1)           | -11(1)          |
| O(4)  | 69(2)           | 74(2)           | 67(2)           | 18(2)           | 41(1)           | 19(2)           |
| O(5)  | 70(2)           | 41(1)           | 115(2)          | 5(2)            | 57(2)           | 17(1)           |
| N(1)  | 38(2)           | 38(2)           | 29(1)           | 5(1)            | 5(1)            | 12(1)           |
| N(2)  | 29(2)           | 38(2)           | 28(1)           | 2(1)            | 5(1)            | 7(1)            |
| N(3)  | 34(2)           | 53(2)           | 28(1)           | 1(1)            | 12(1)           | 17(1)           |
| N(4)  | 41(2)           | 40(2)           | 66(2)           | -6(2)           | 24(2)           | 3(2)            |
| C(1)  | 28(2)           | 33(2)           | 24(2)           | 2(1)            | 1(1)            | 1(2)            |
| C(2)  | 25(2)           | 30(2)           | 26(2)           | -1(1)           | 0(1)            | 3(1)            |
| C(3)  | 29(2)           | 37(2)           | 28(2)           | -1(1)           | 2(1)            | 5(2)            |
| C(4)  | 39(2)           | 35(2)           | 37(2)           | 6(2)            | 4(2)            | 6(2)            |
| C(5)  | 34(2)           | 34(2)           | 48(2)           | -4(2)           | 3(2)            | 9(2)            |
| C(6)  | 28(2)           | 38(2)           | 36(2)           | -6(2)           | 13(1)           | 0(2)            |
| C(7)  | 29(2)           | 33(2)           | 31(2)           | 0(2)            | 6(2)            | 1(2)            |
| C(8)  | 31(2)           | 31(2)           | 26(2)           | -3(1)           | 2(1)            | 4(2)            |
| C(9)  | 37(2)           | 29(2)           | 32(2)           | -1(2)           | 0(2)            | 6(2)            |
| C(10) | 51(3)           | 77(3)           | 74(3)           | -15(3)          | -5(3)           | -25(3)          |
| C(11) | 35(3)           | 68(3)           | 45(2)           | 11(2)           | 11(2)           | 10(2)           |
| C(12) | 49(3)           | 110(4)          | 57(3)           | 3(3)            | 0(2)            | -23(3)          |
| C(13) | 54(3)           | 57(2)           | 29(2)           | -2(2)           | 11(2)           | 19(2)           |
| C(14) | 63(3)           | 71(3)           | 37(2)           | -13(2)          | 0(2)            | 11(3)           |

Table 5. Hydrogen coordinates ( $\times 10^4$ ) and isotropic displacement parameters ( $\text{\AA}^2 \times 10^3$ ) for **10a**.

|        | x         | y         | z         | U(eq)   |
|--------|-----------|-----------|-----------|---------|
| H(1O)  | -530(40)  | 1350(30)  | 910(30)   | 105(16) |
| H(4)   | -2900(30) | 4300(20)  | -2470(30) | 56(10)  |
| H(5)   | -4550(30) | 4401(18)  | -1020(20) | 36(8)   |
| H(7)   | -3290(20) | 2044(15)  | 412(19)   | 17(7)   |
| H(8)   | -160(30)  | 591(16)   | -1140(20) | 29(8)   |
| H(10A) | -3930(40) | -800(30)  | -2040(40) | 110(17) |
| H(10B) | -3610(40) | -1040(30) | -680(30)  | 91(16)  |
| H(10C) | -4520(50) | -200(30)  | -1100(40) | 107(19) |
| H(11A) | 2420(30)  | 1900(20)  | -3060(30) | 62(11)  |
| H(11B) | 1510(30)  | 2790(20)  | -3230(30) | 56(10)  |
| H(12A) | 1560(50)  | 2940(30)  | -1080(40) | 117(19) |
| H(12B) | 2280(40)  | 2000(30)  | -1020(30) | 96(18)  |
| H(12C) | 3050(40)  | 2880(20)  | -1460(30) | 86(13)  |
| H(13A) | -210(30)  | 1870(20)  | -4410(30) | 58(10)  |
| H(13B) | 980(30)   | 1110(20)  | -4260(30) | 62(10)  |
| H(14A) | -1320(30) | 443(19)   | -4710(30) | 59(10)  |
| H(14B) | -1900(40) | 870(20)   | -3570(30) | 73(12)  |
| H(14C) | -680(40)  | 30(20)    | -3420(30) | 84(13)  |

Table 6. Hydrogen bonds for **10a** [ $\text{\AA}$  and  $^\circ$ ].

| D-H...A             | d(D-H)  | d(H...A) | d(D...A) | $\angle$ (DHA) |
|---------------------|---------|----------|----------|----------------|
| O(1)-H(1O)...N(1)#1 | 0.89(4) | 2.09(4)  | 2.938(3) | 160(4)         |

Symmetry transformations used to generate equivalent atoms:

#1 x,-y+1/2,z+1/2

## References:

- 1) (a) Herges, R.; Geuenich, D. *J. Phys. Chem. A* **2001**, *105*, 3214-3220. (b) Geuenich, D.; Hess, K.; Kohler, F.; Herges, R. *Chem. Rev.* **2005**, *105*, 3758-3772.
- 2) (a) Pena-Gallego, A.; Rodriguez-Otero, J.; Cabaleiro-Lago, E. M. *J. Org. Chem.* **2004**, *69*, 7013-7017. (b) Rodriguez-Otero, J.; Cabaleiro-Lago, E. M.; Hermida-Ramon, J. M.; Pena-Gallego, A. *J. Org. Chem.* **2003**, *68*, 8823-8830. (c) Subbotina, J. O.; Bakulev, V. A.; Herges, R.; Fabian, W. M. F. *Int. J. Quant. Chem.* **2006**, *106*, 2229-2235.
- 3) (a) Shirtcliff, L. D.; Hayes, A. G.; Haley, M. M.; Kohler, F.; Hess, K.; Herges, R. *J. Am. Chem. Soc.* **2006**, *128*, 9711-9721. (b) McClintock, S. P.; Shirtcliff, L. D.; Haley, M. M. *J. Org. Chem.* **2008**, *73*, 8755-8762. (c) Kimball, D. B.; Weakley, T. J. R.; Herges, R.; Haley, M. M. *J. Am. Chem. Soc.* **2002**, *124*, 13463-13473. (d) Shirtcliff, L. D.; Hayes, A. G.; Haley, M. M.; Kohler, F.; Hess, K.; Herges, R. *J. Am. Chem. Soc.* **2006**, *128*, 9711-9721.

5b

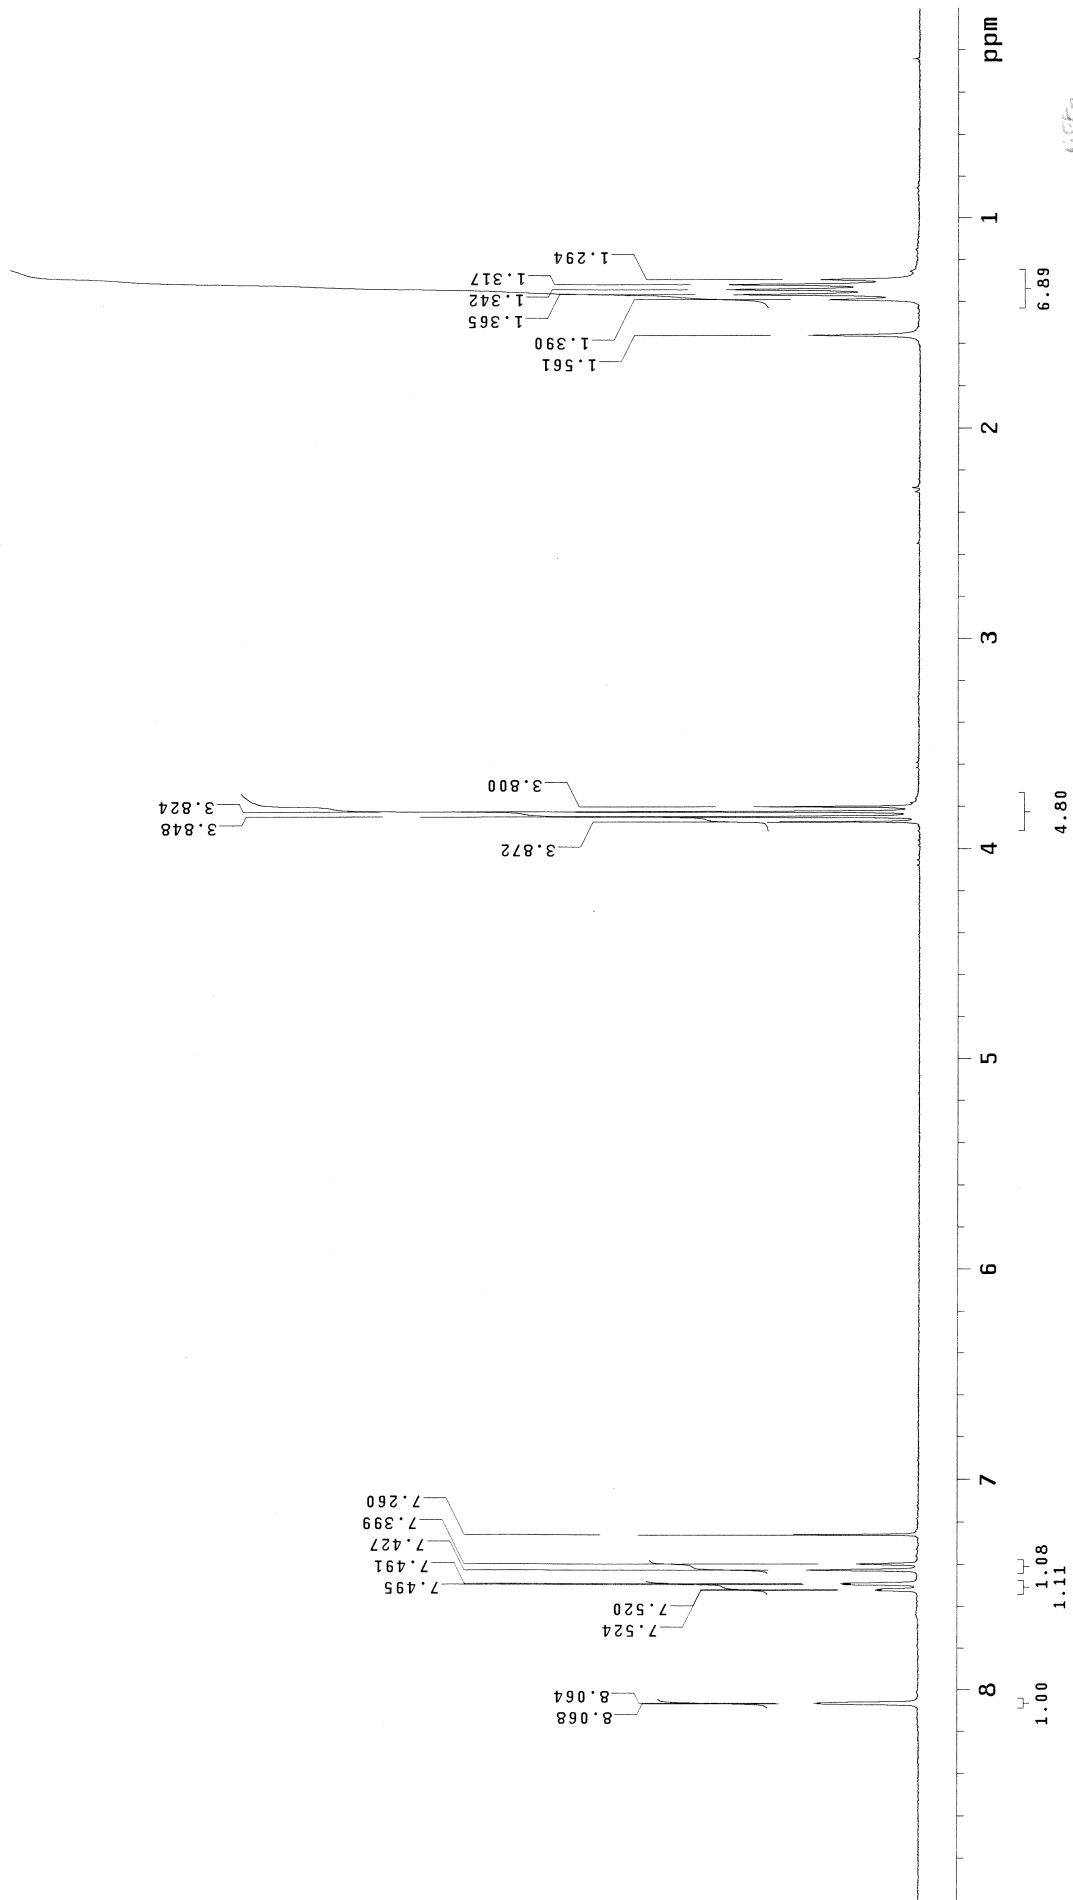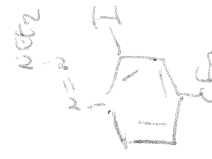



5b

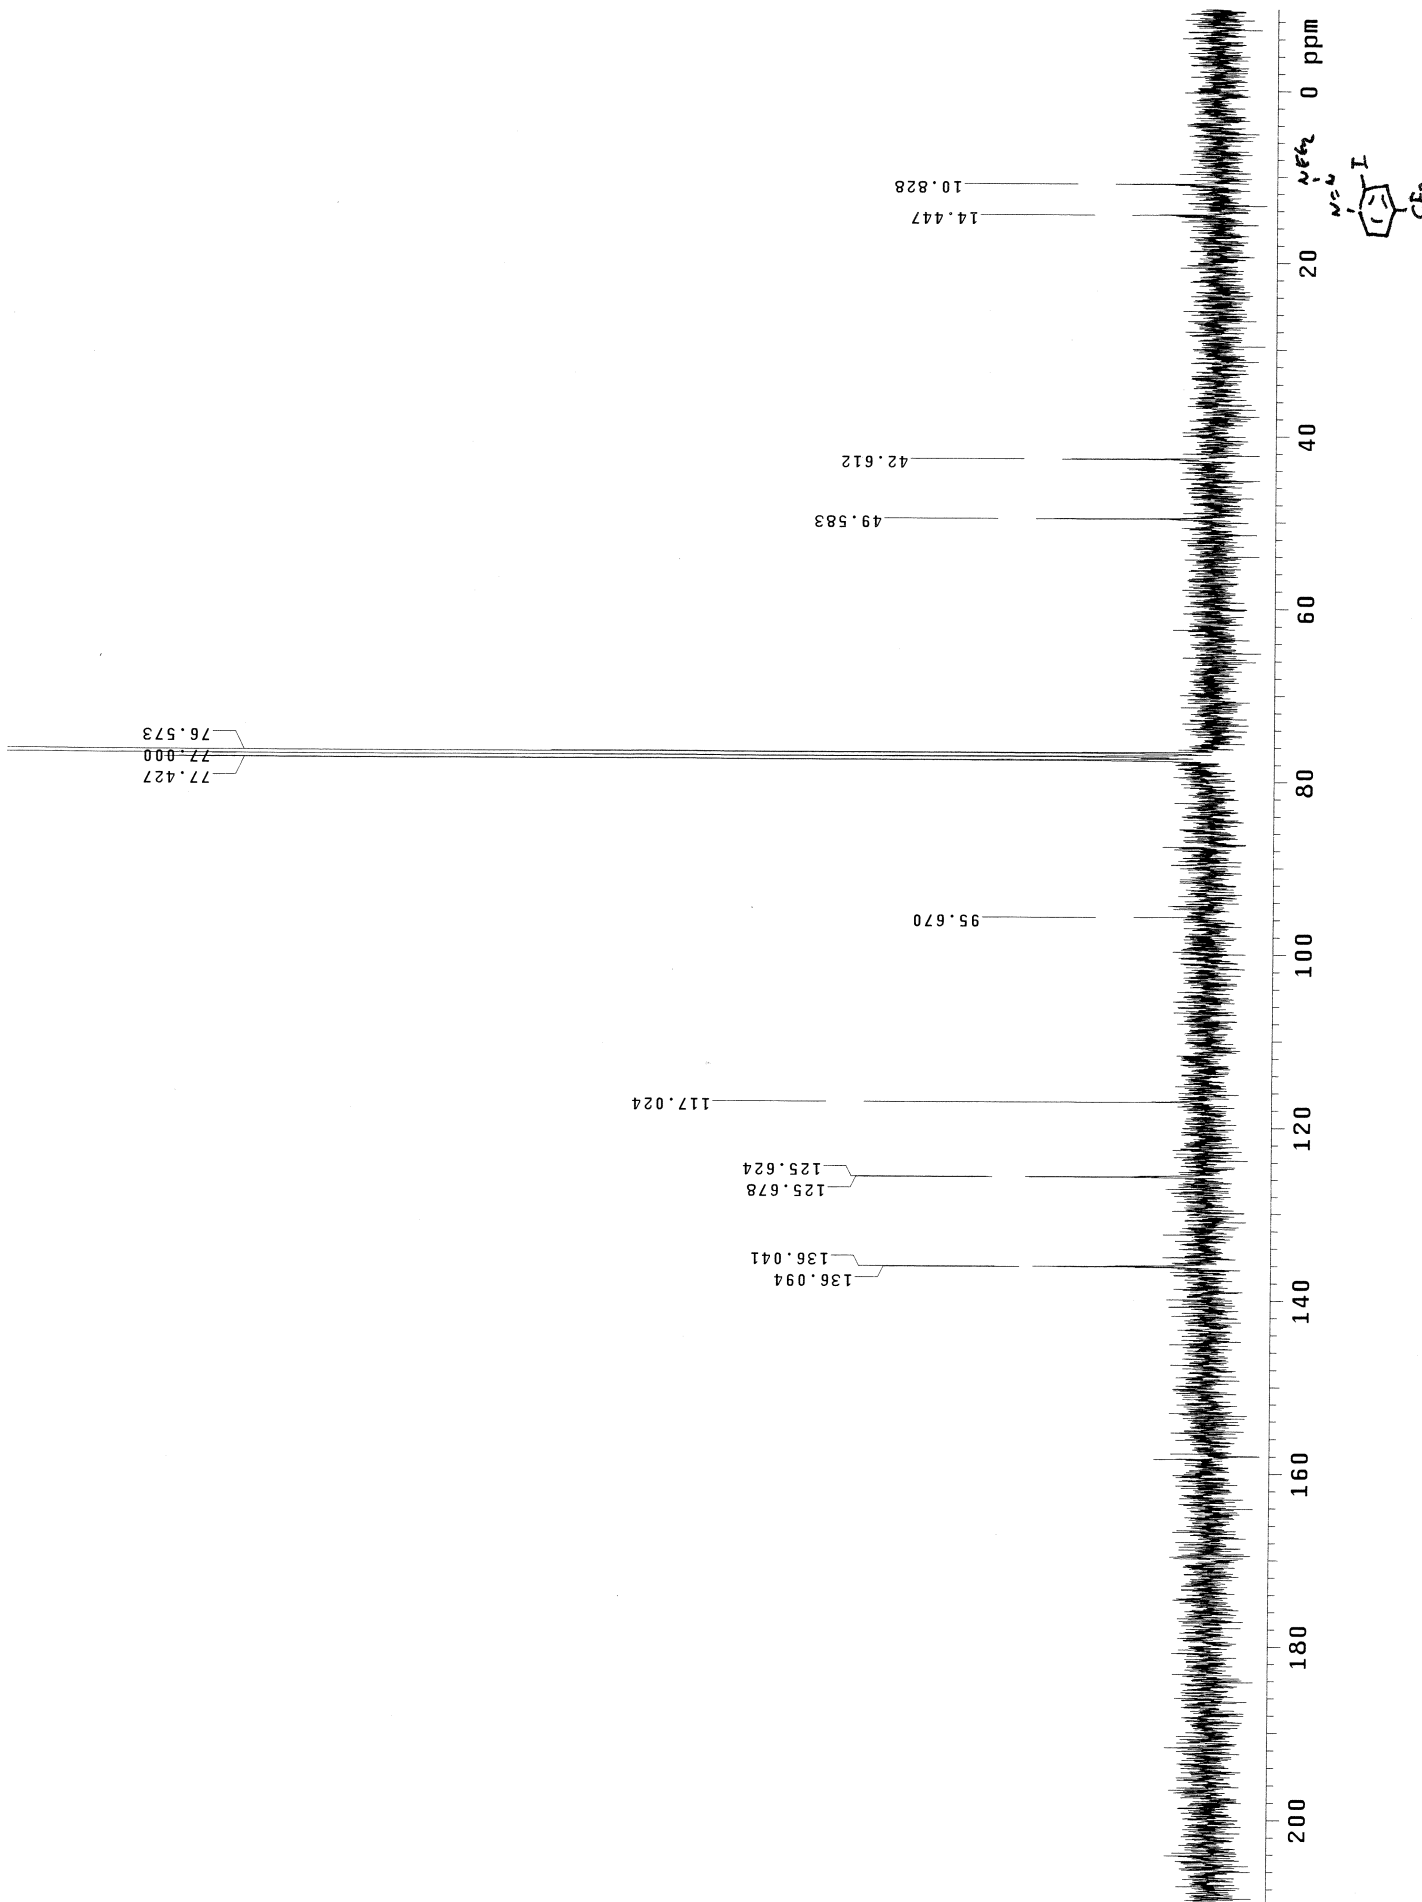

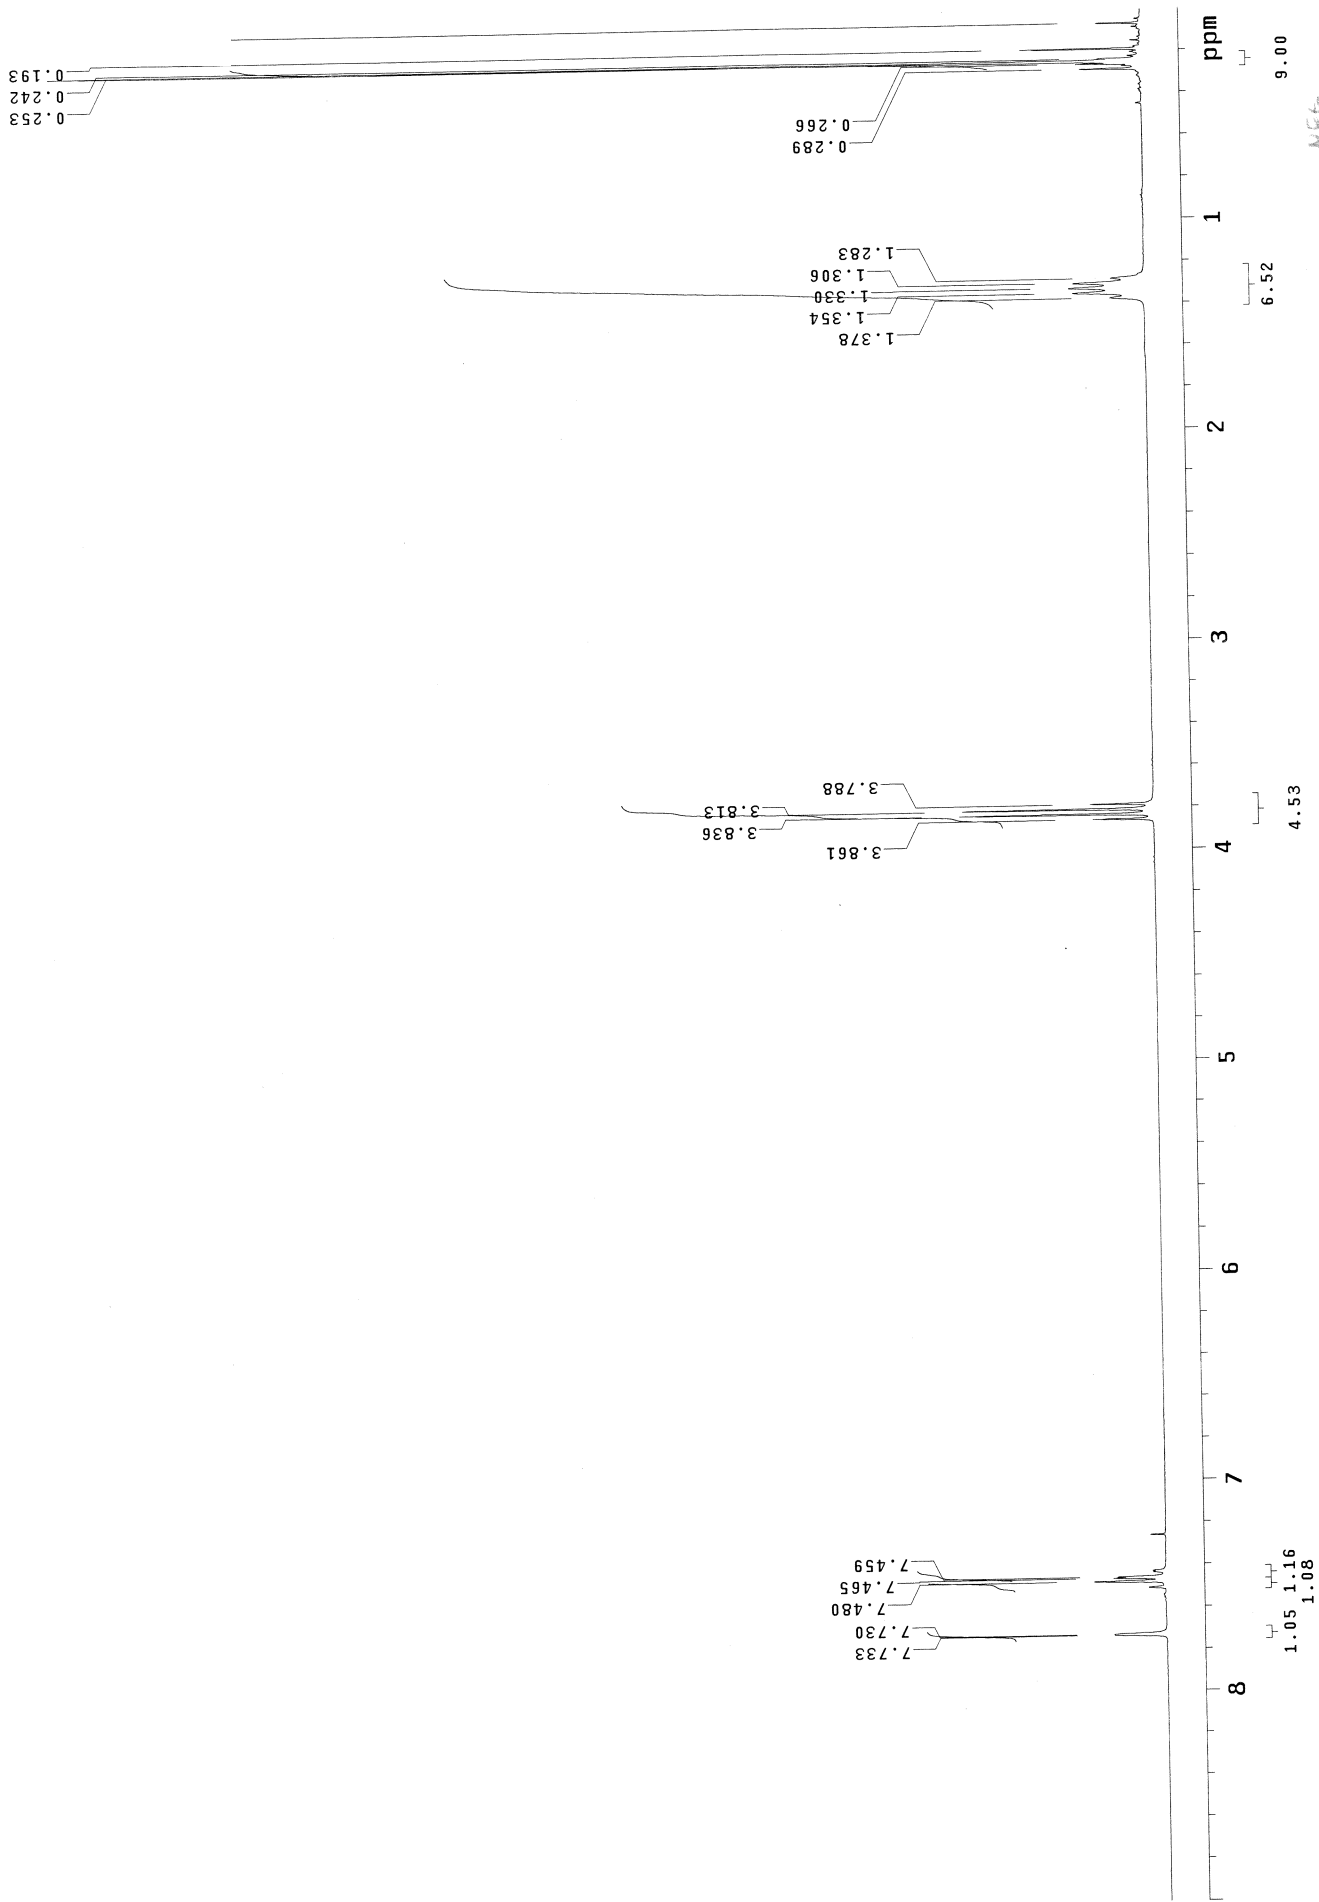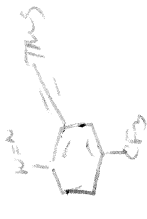

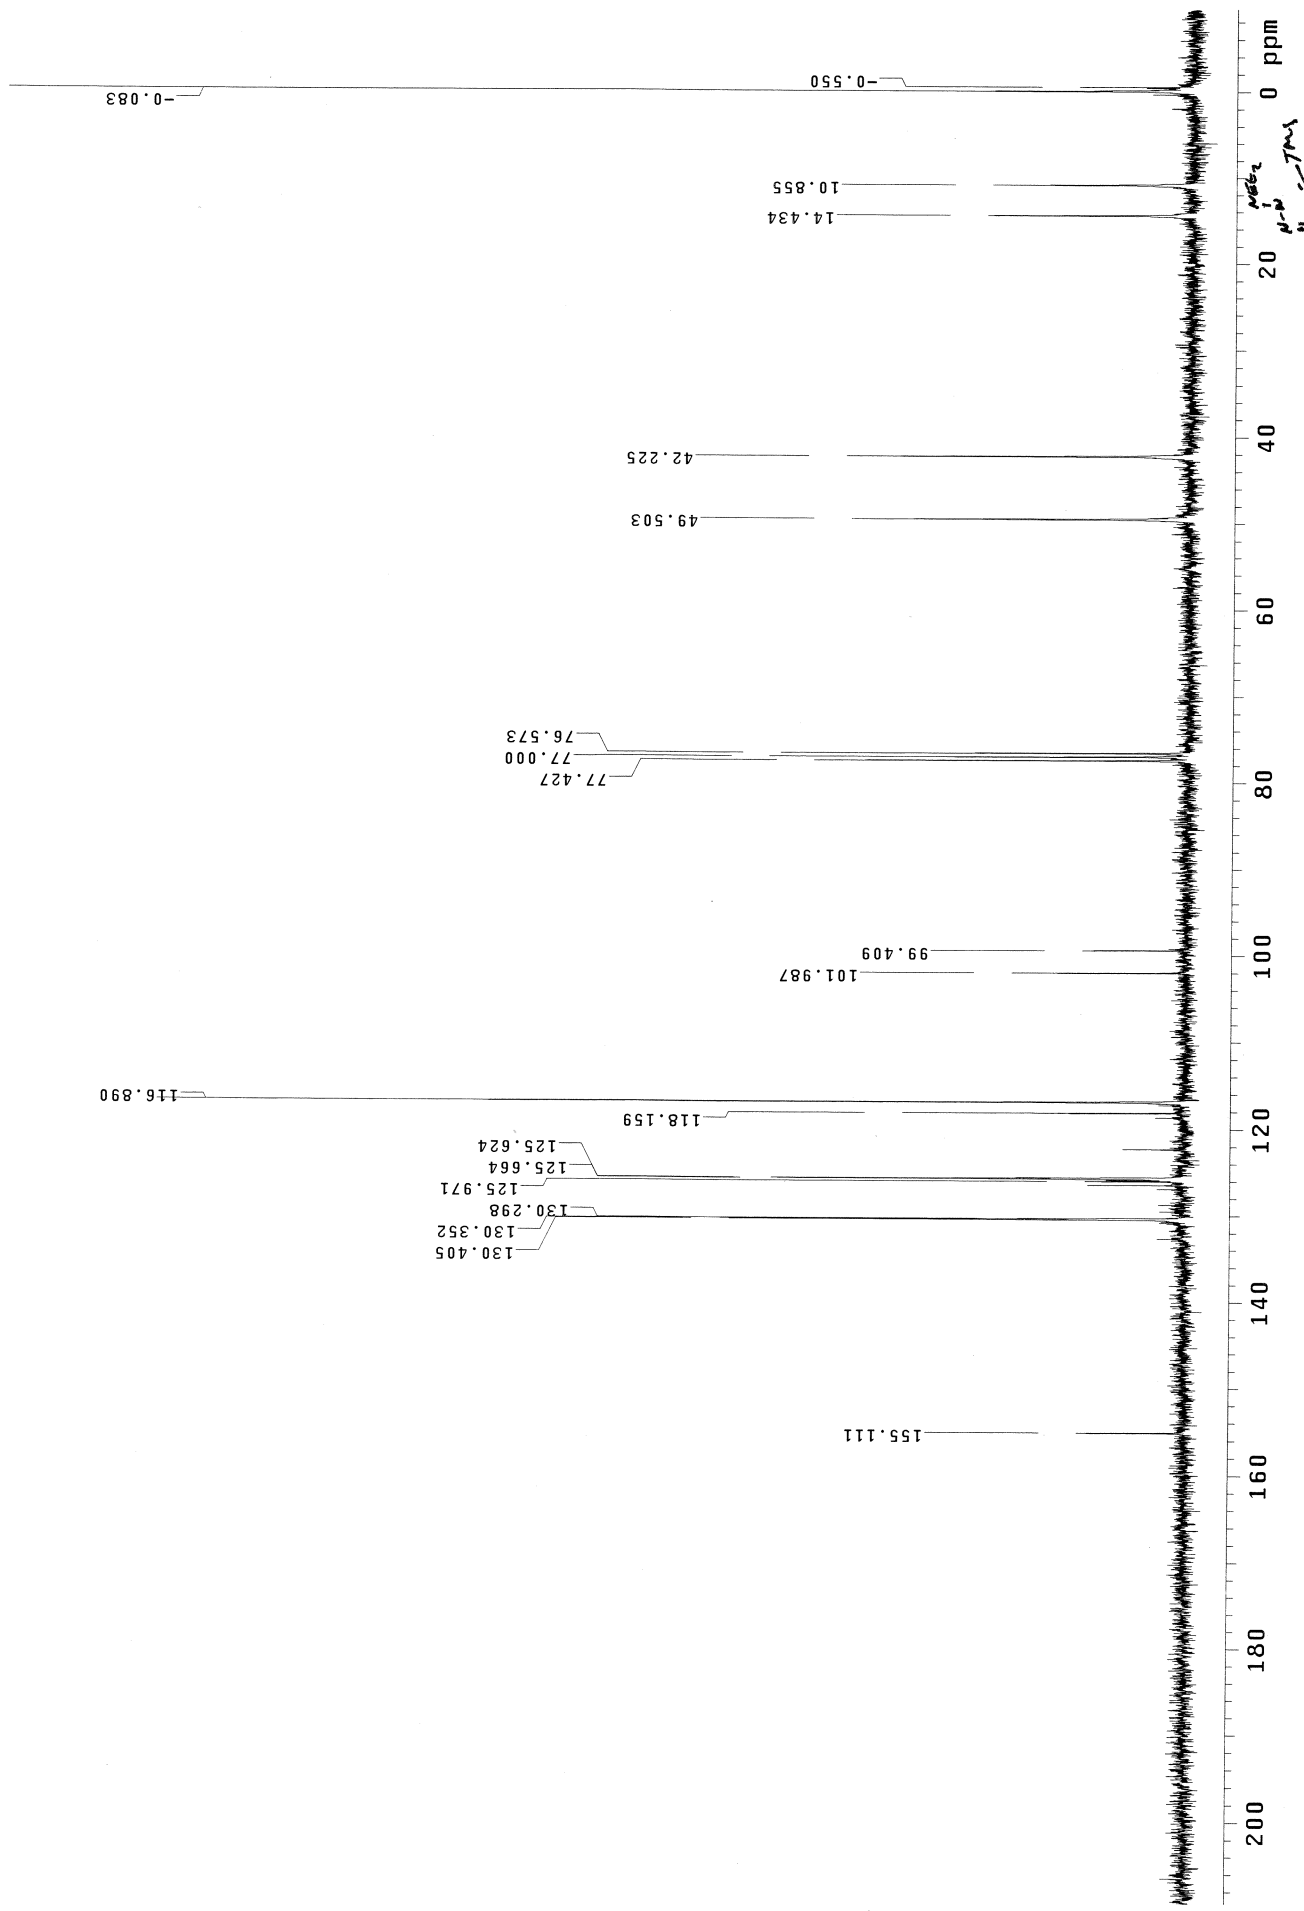

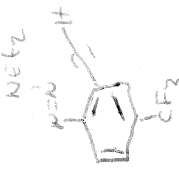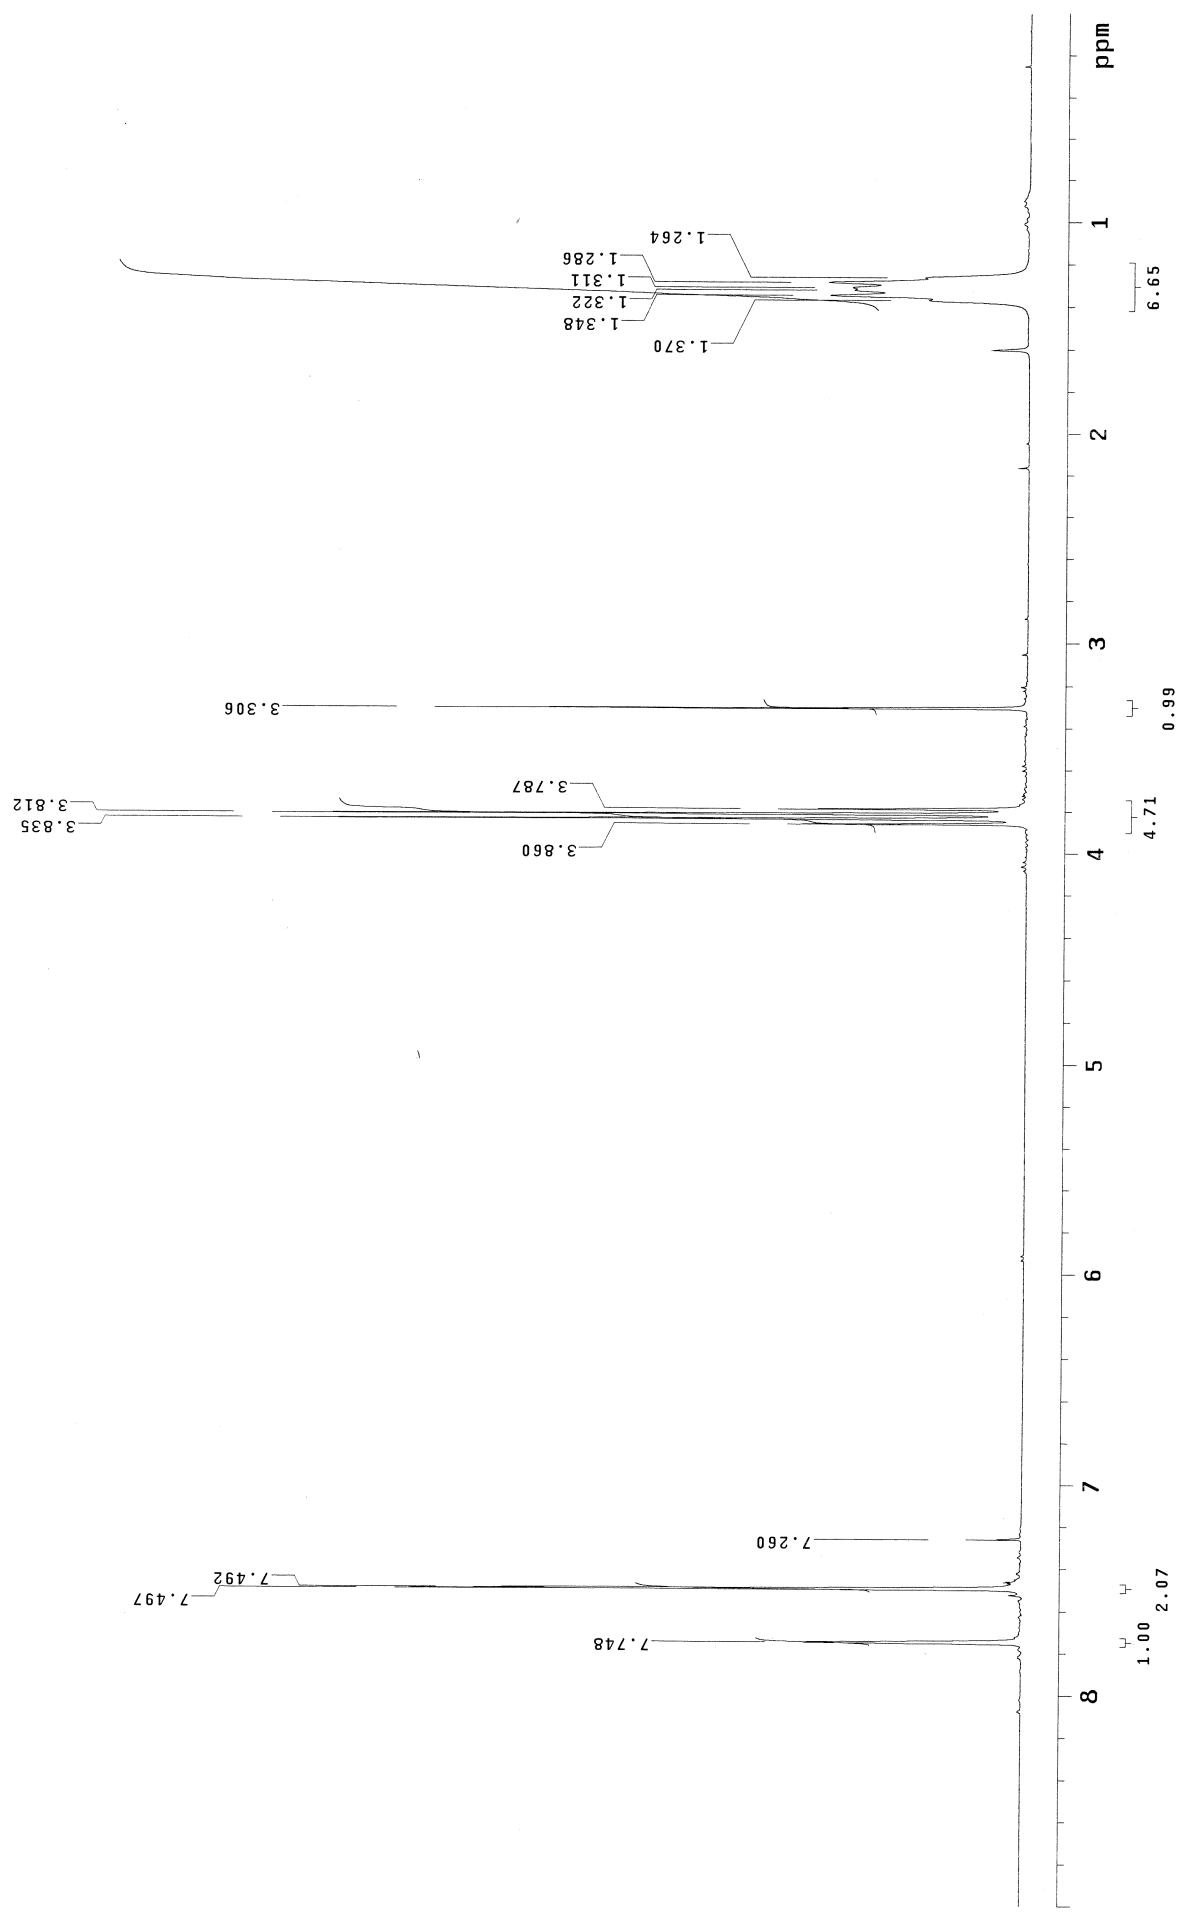

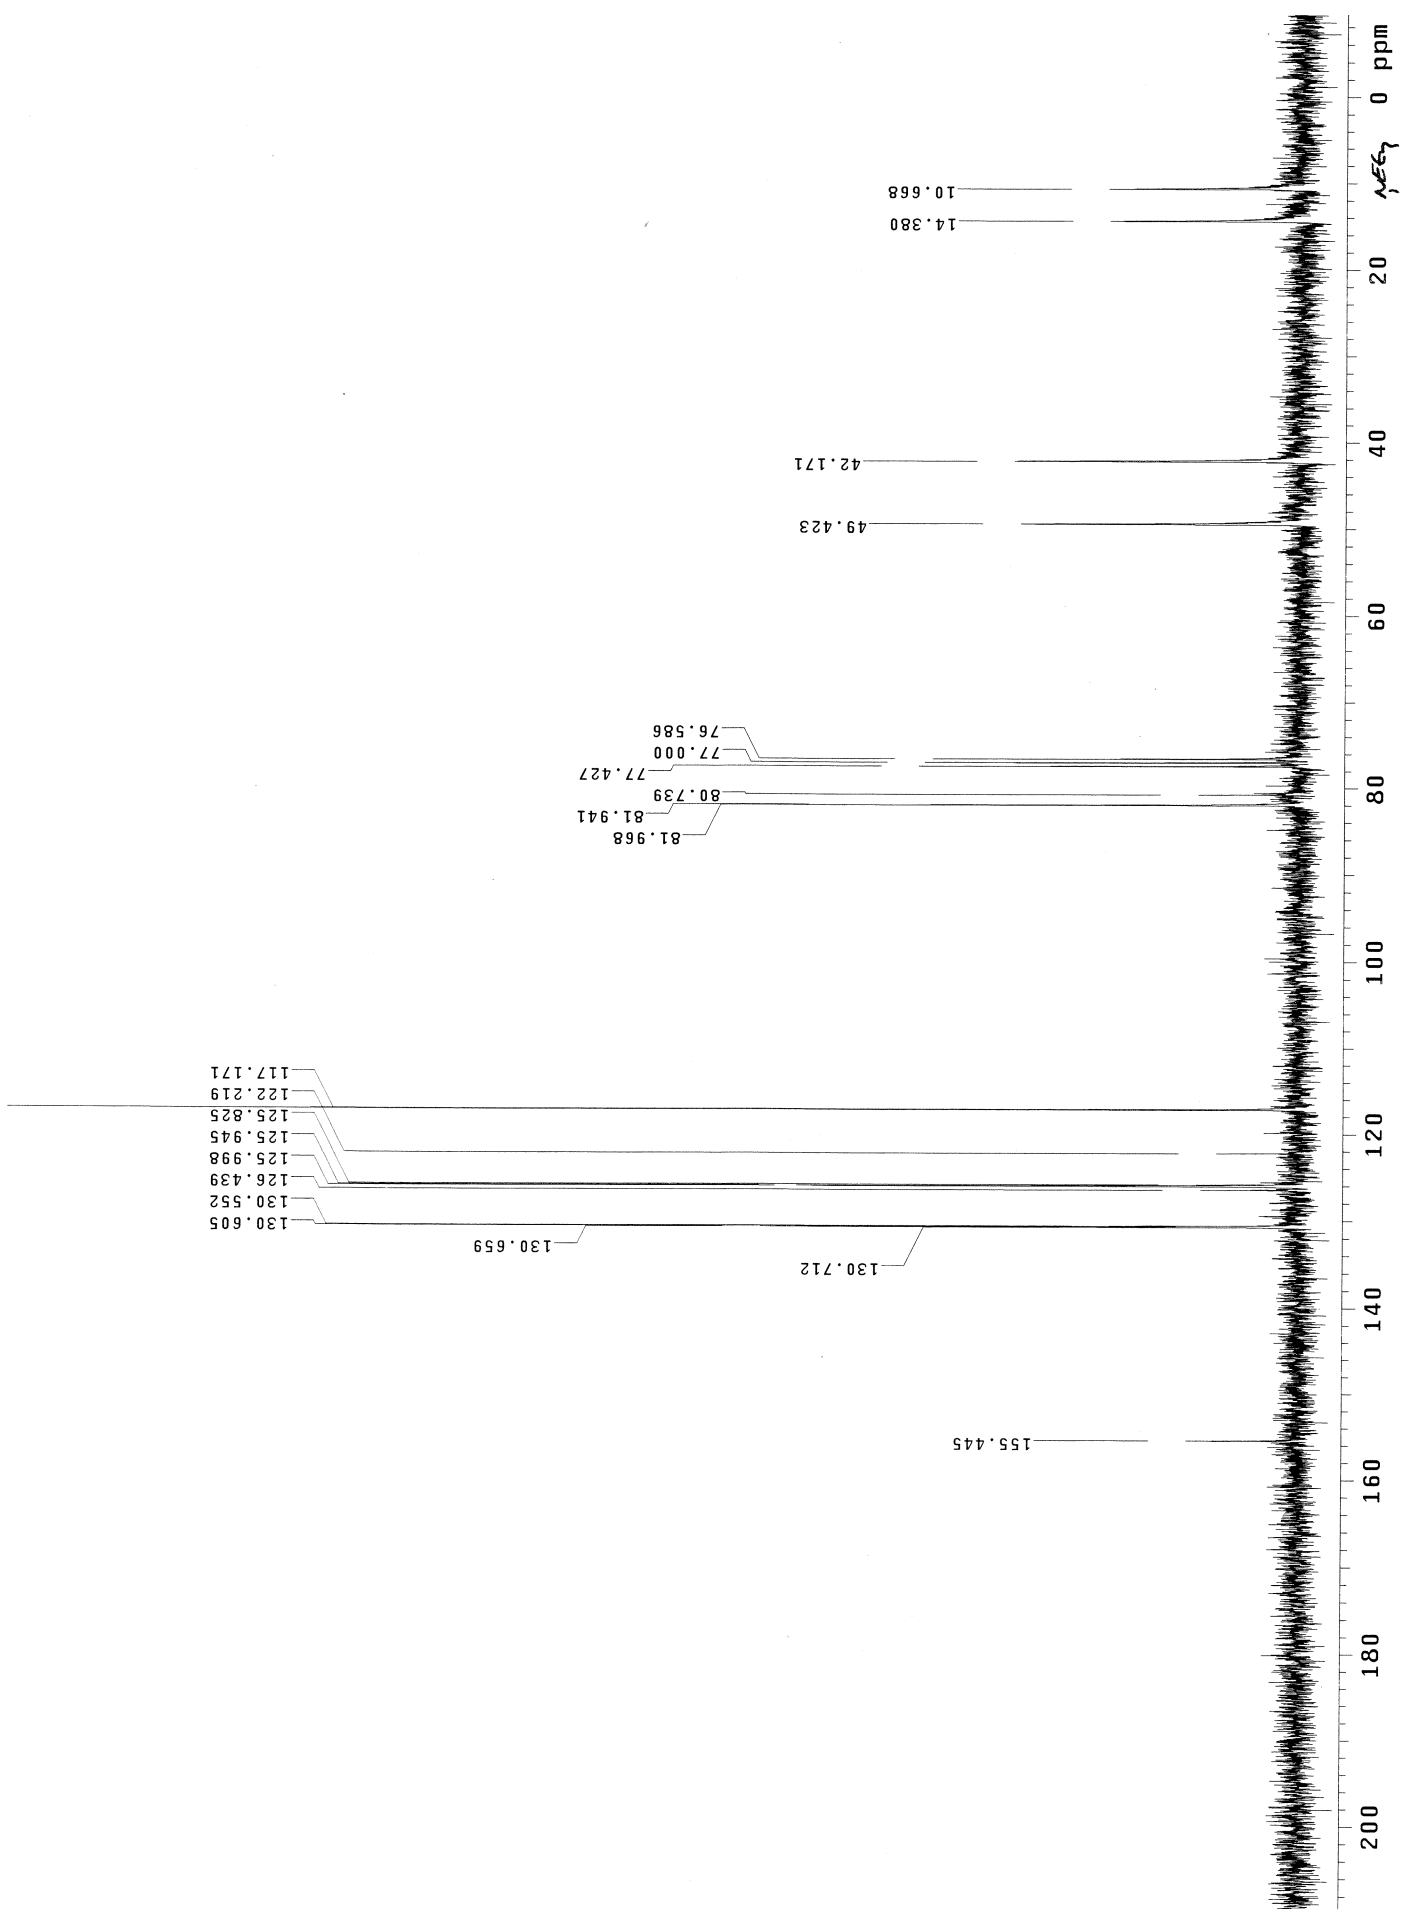

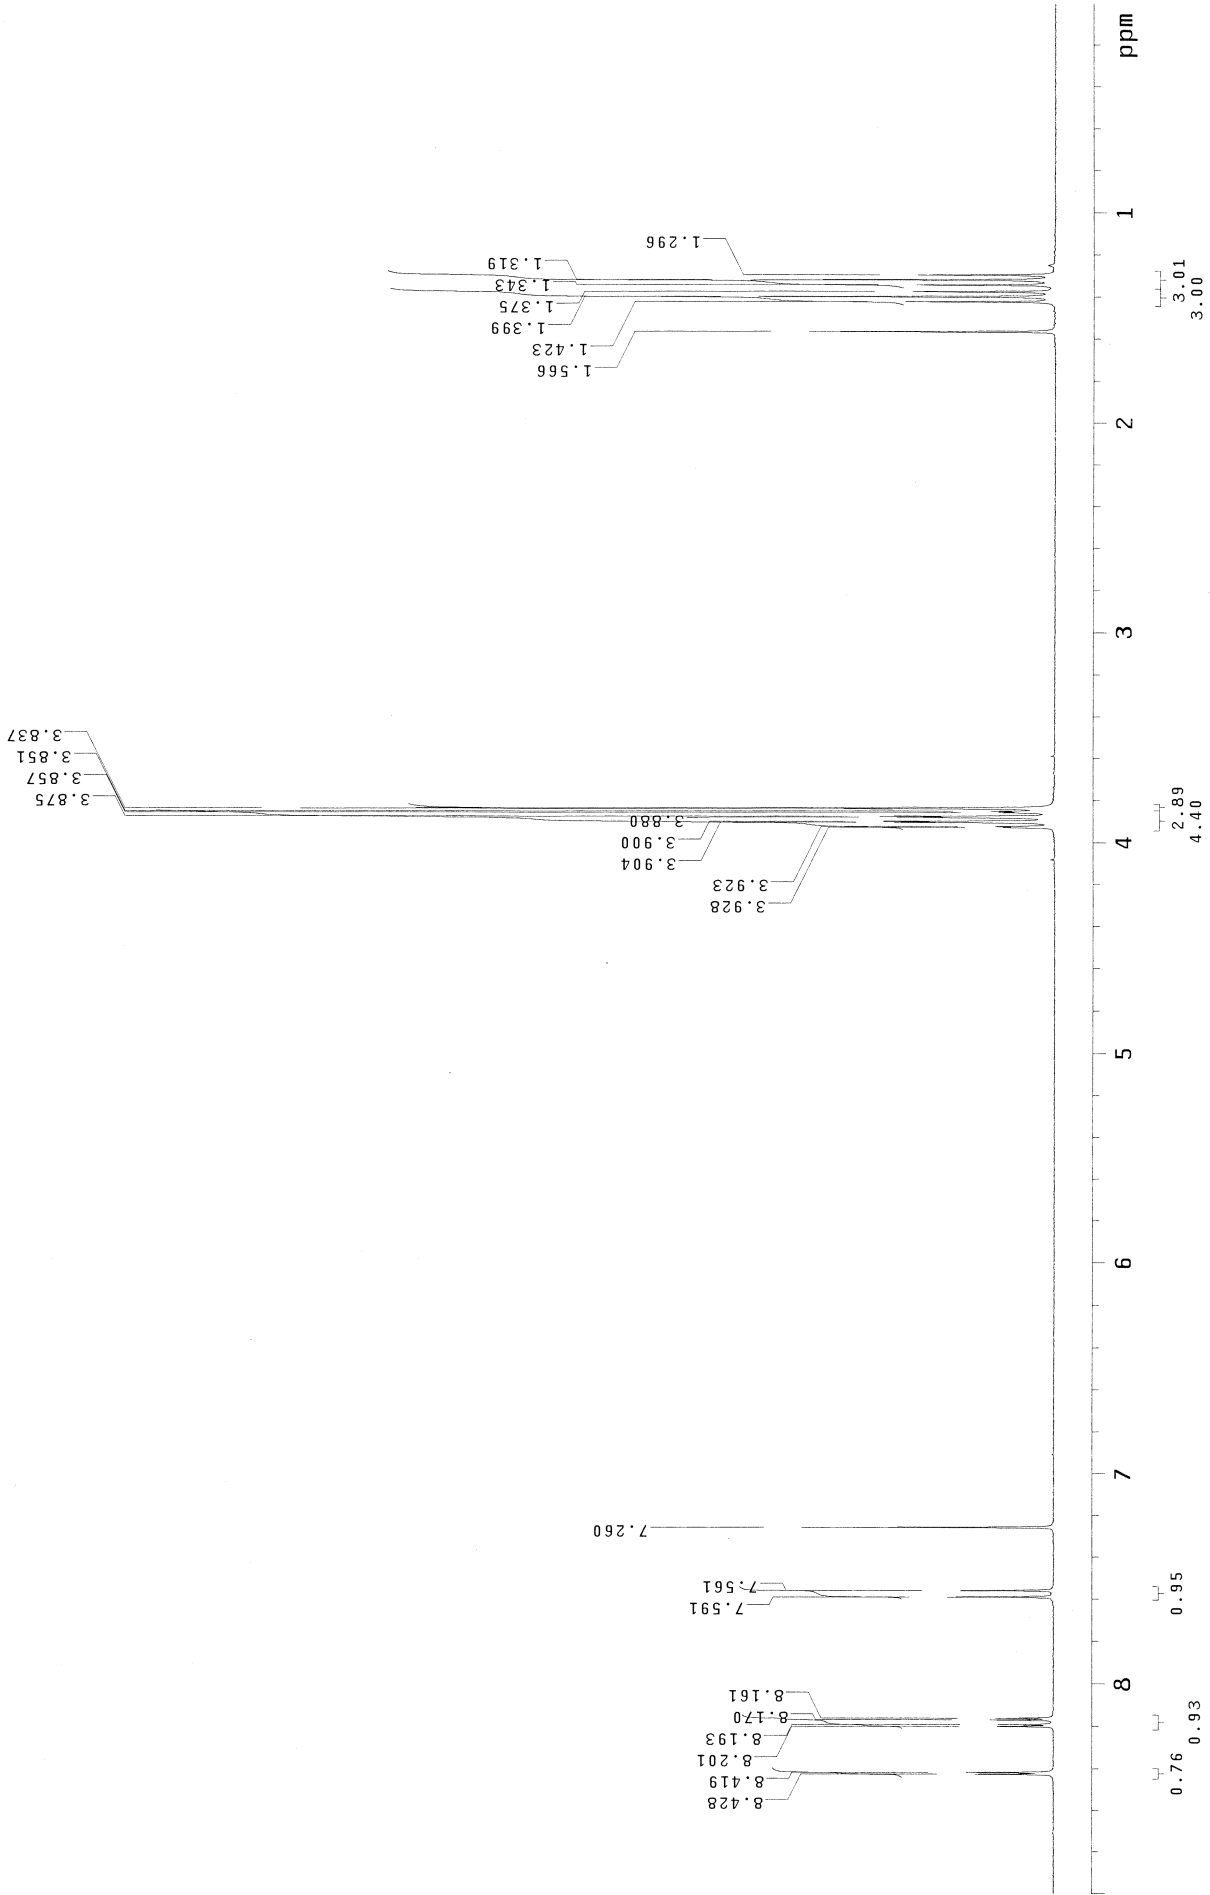

9a

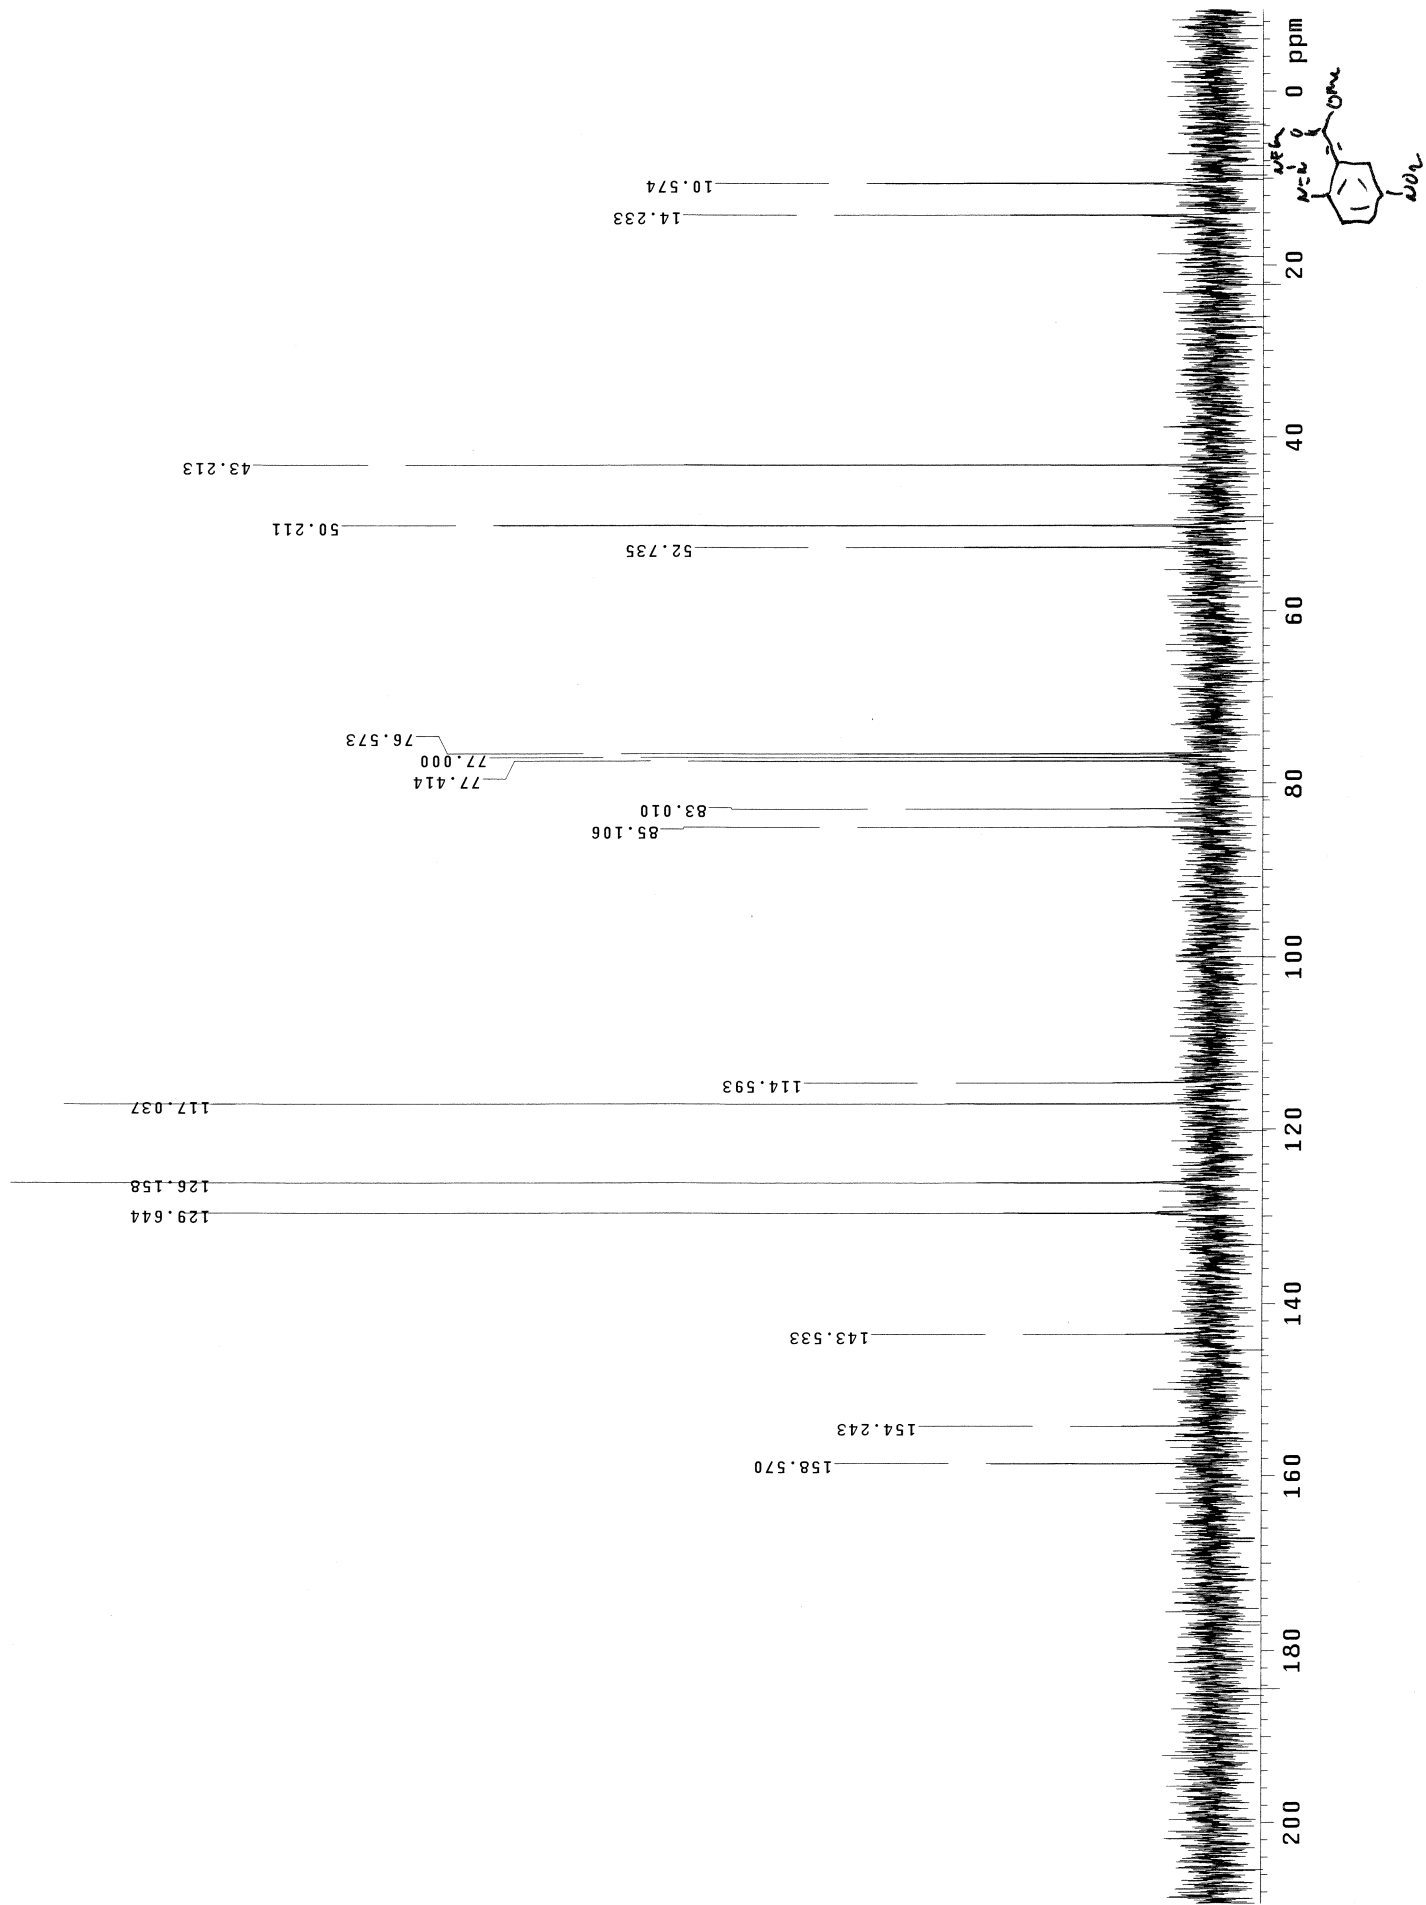

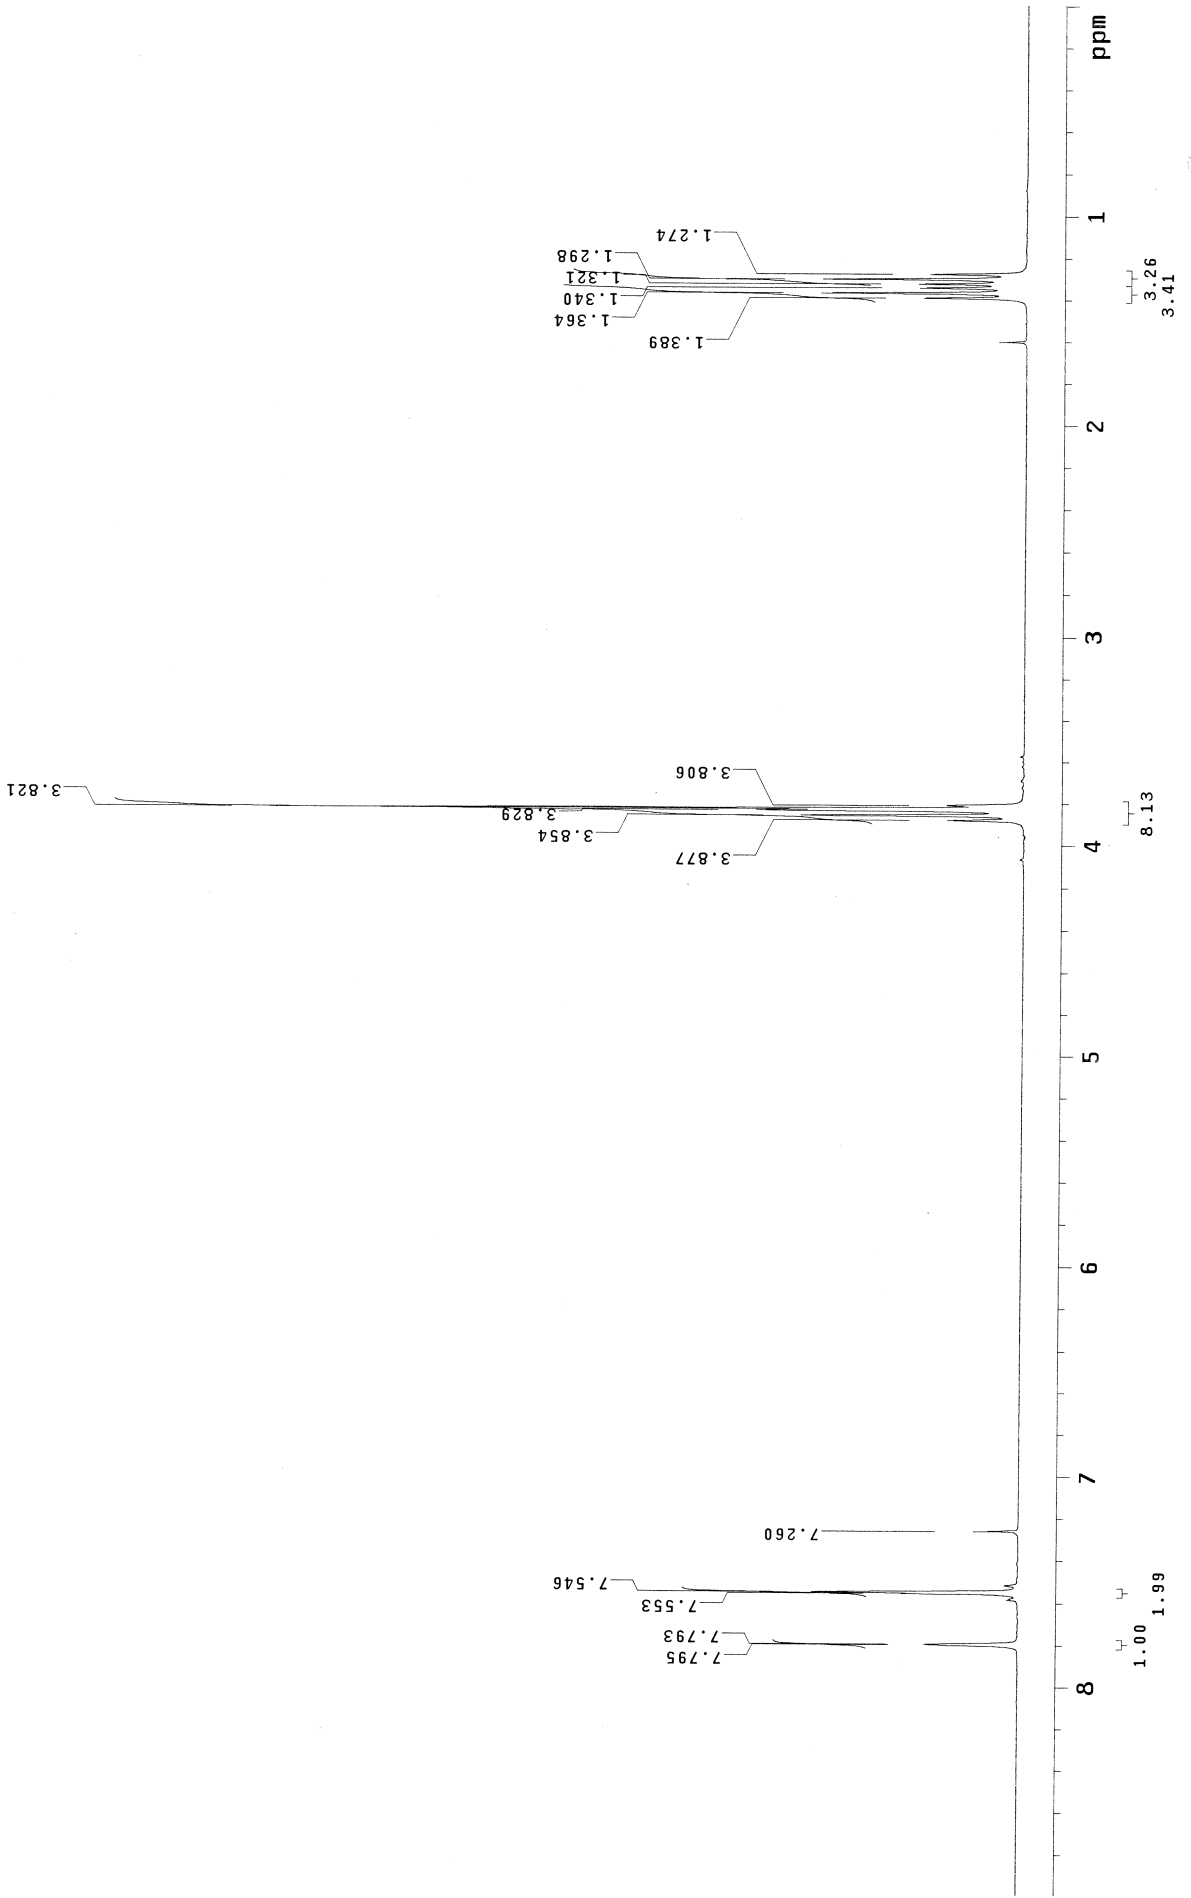



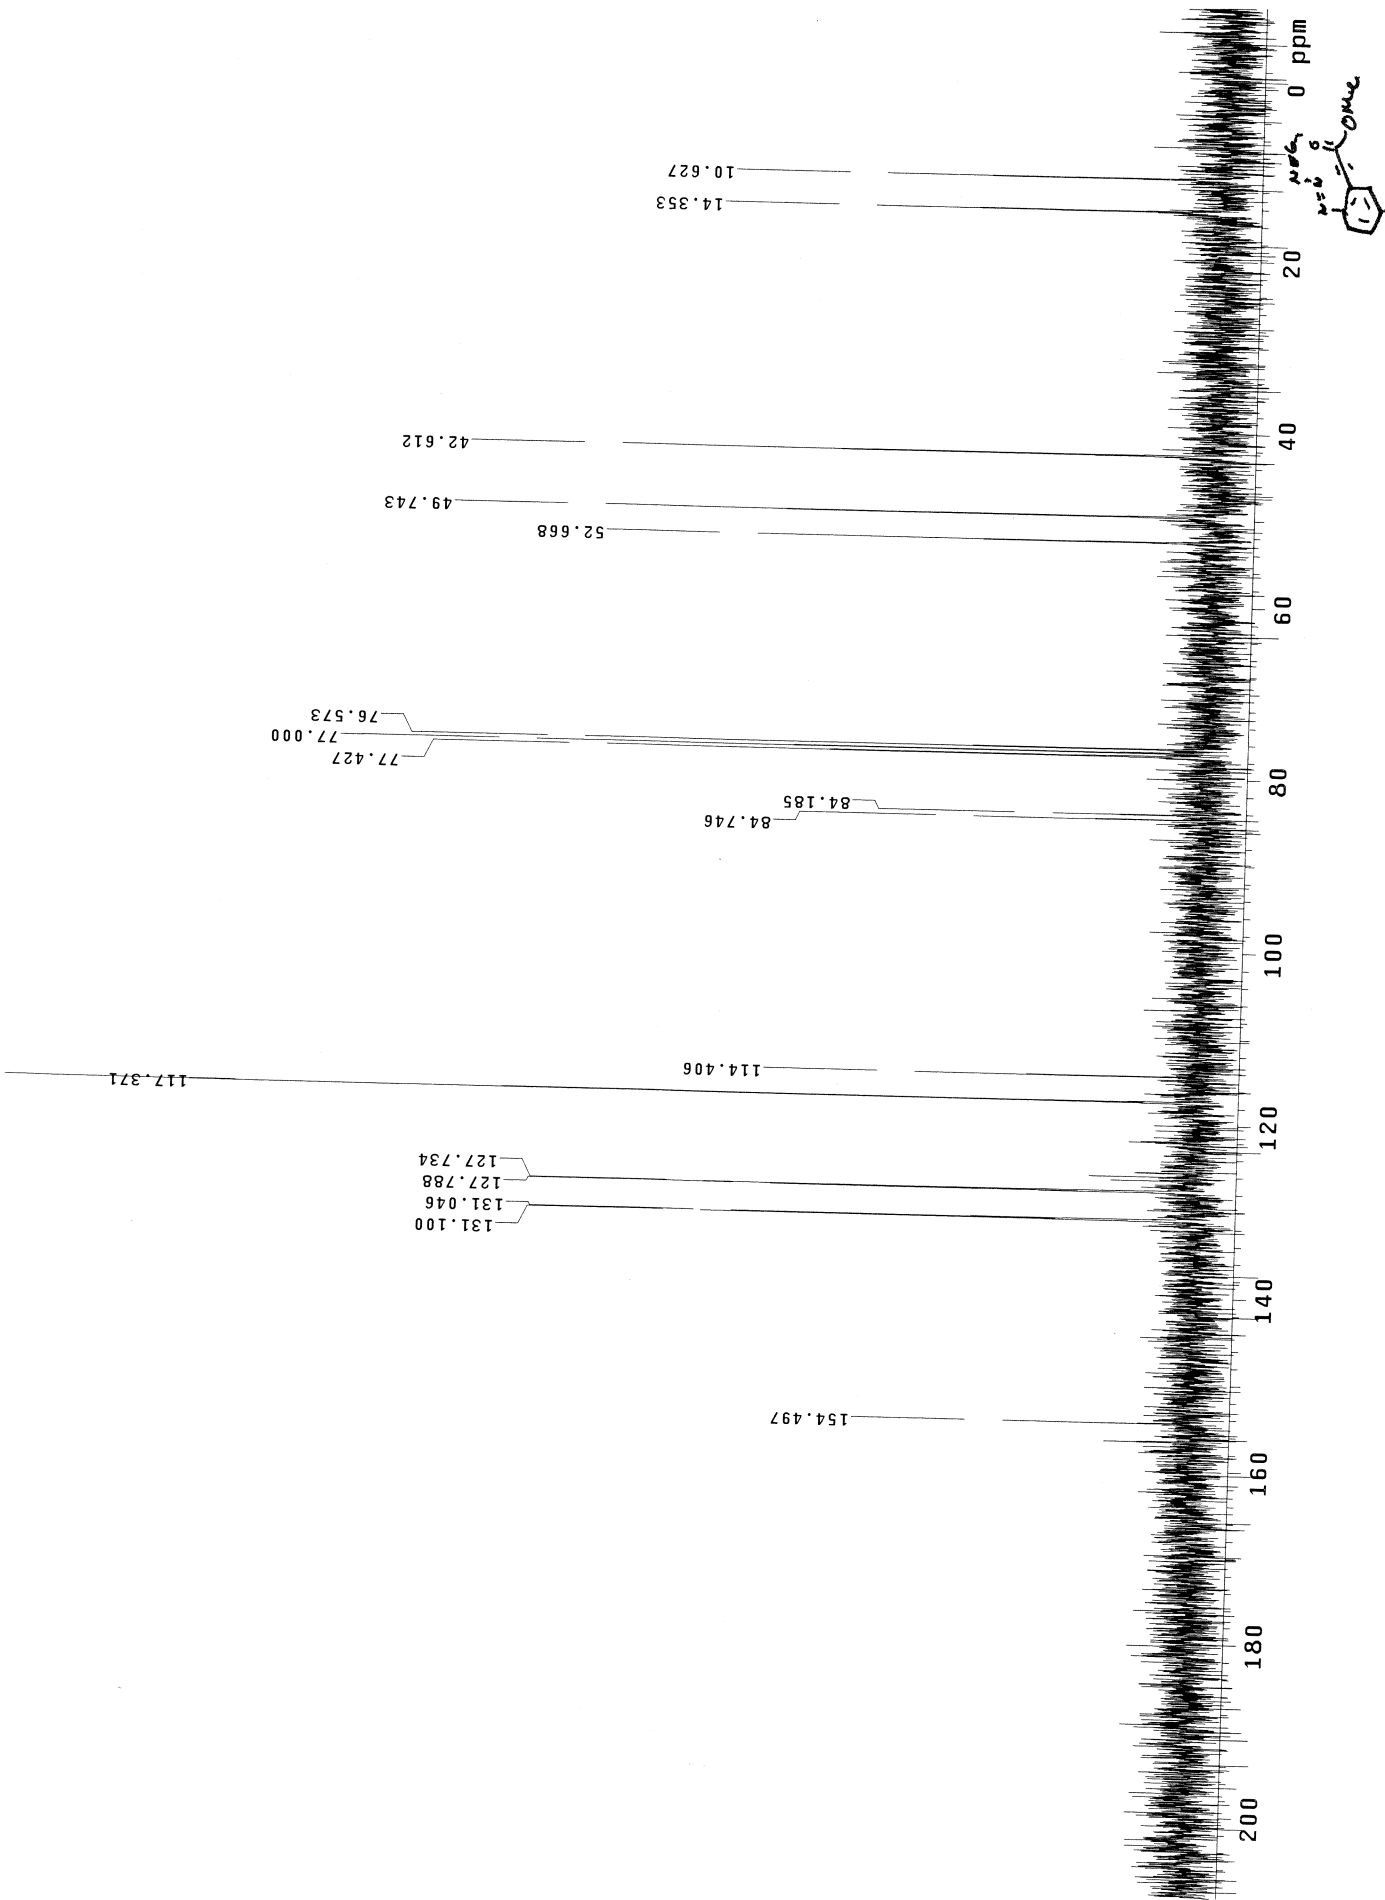

9c

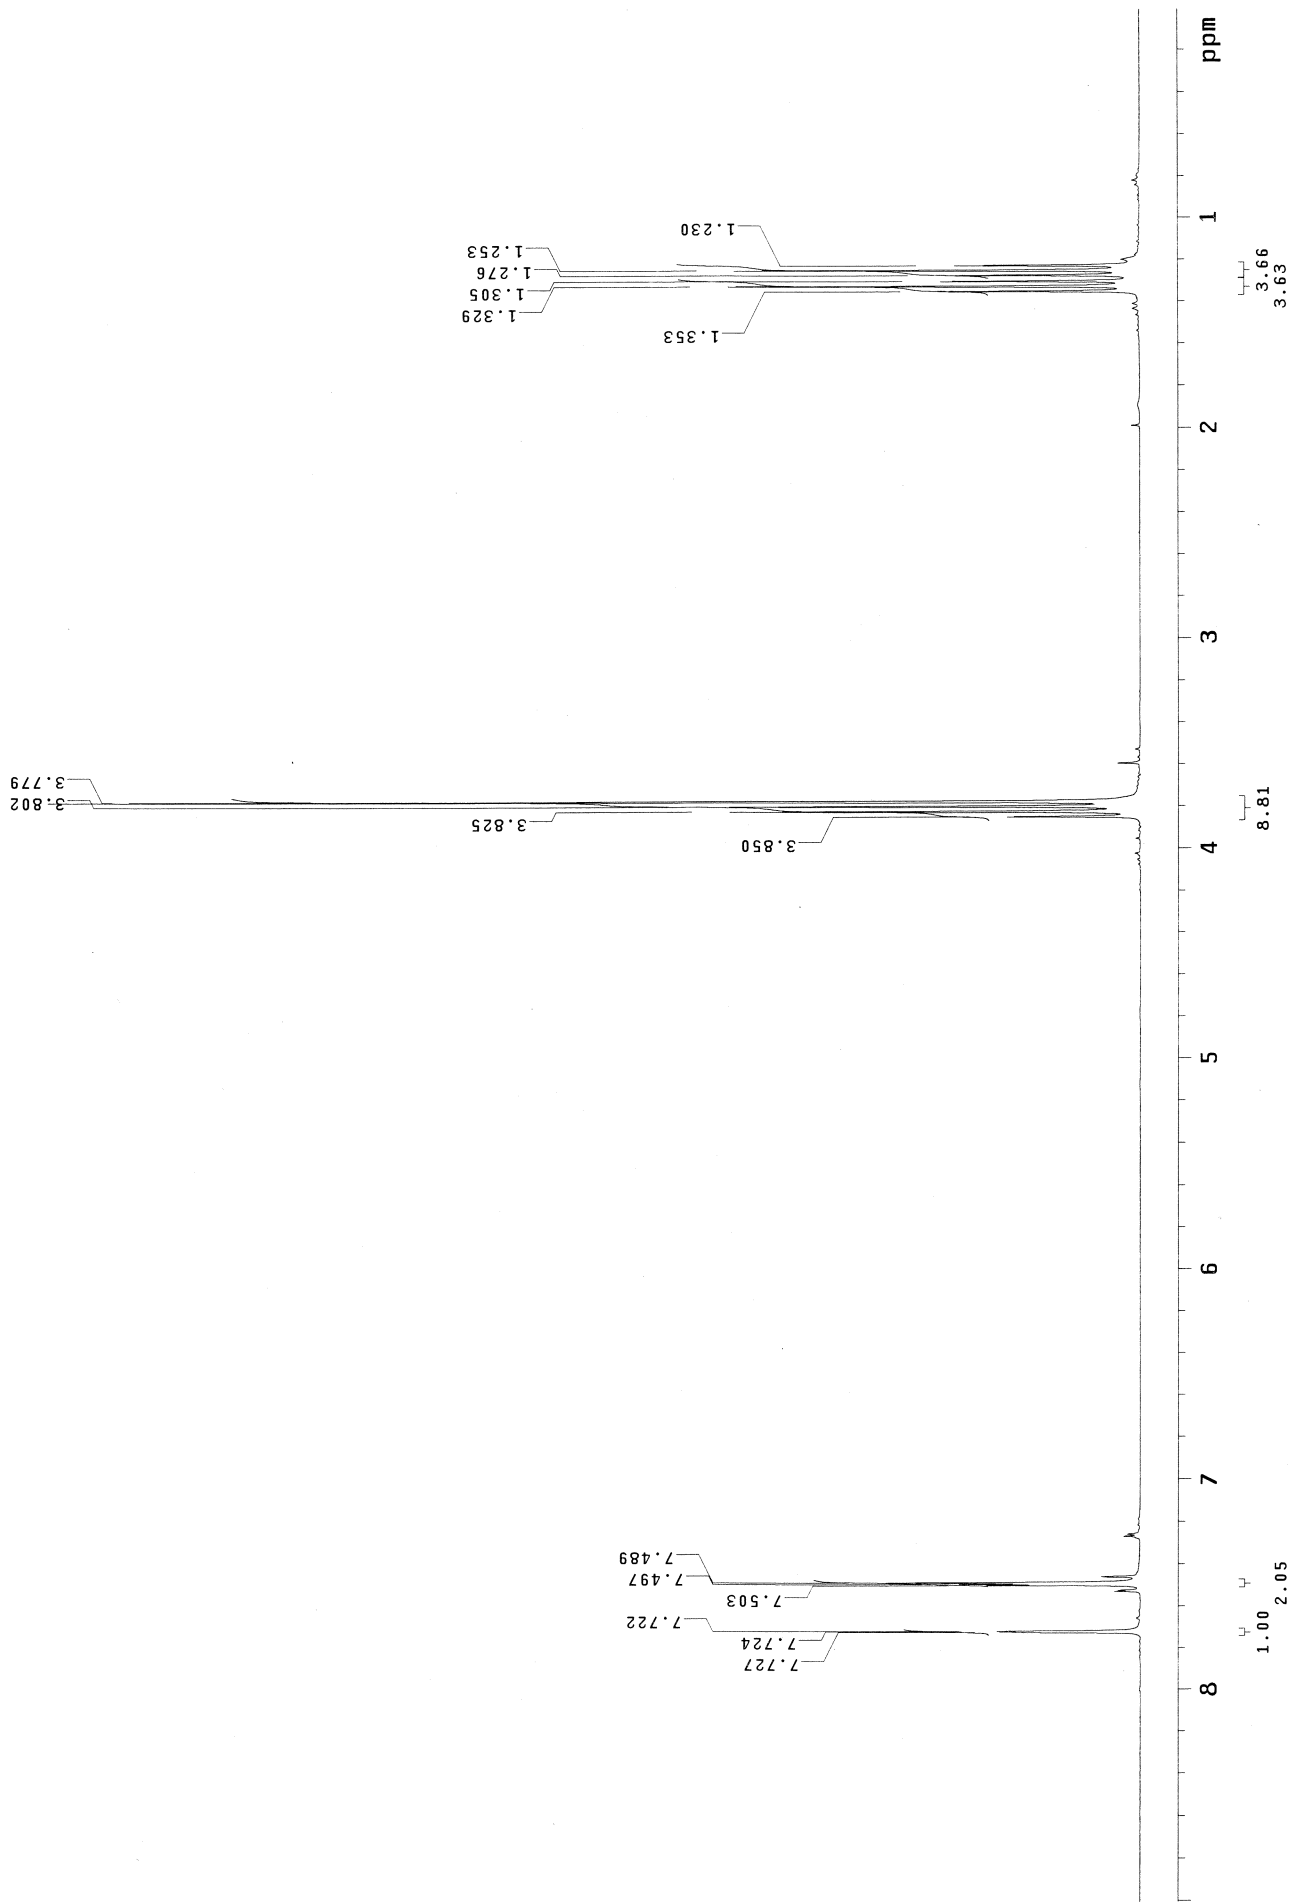

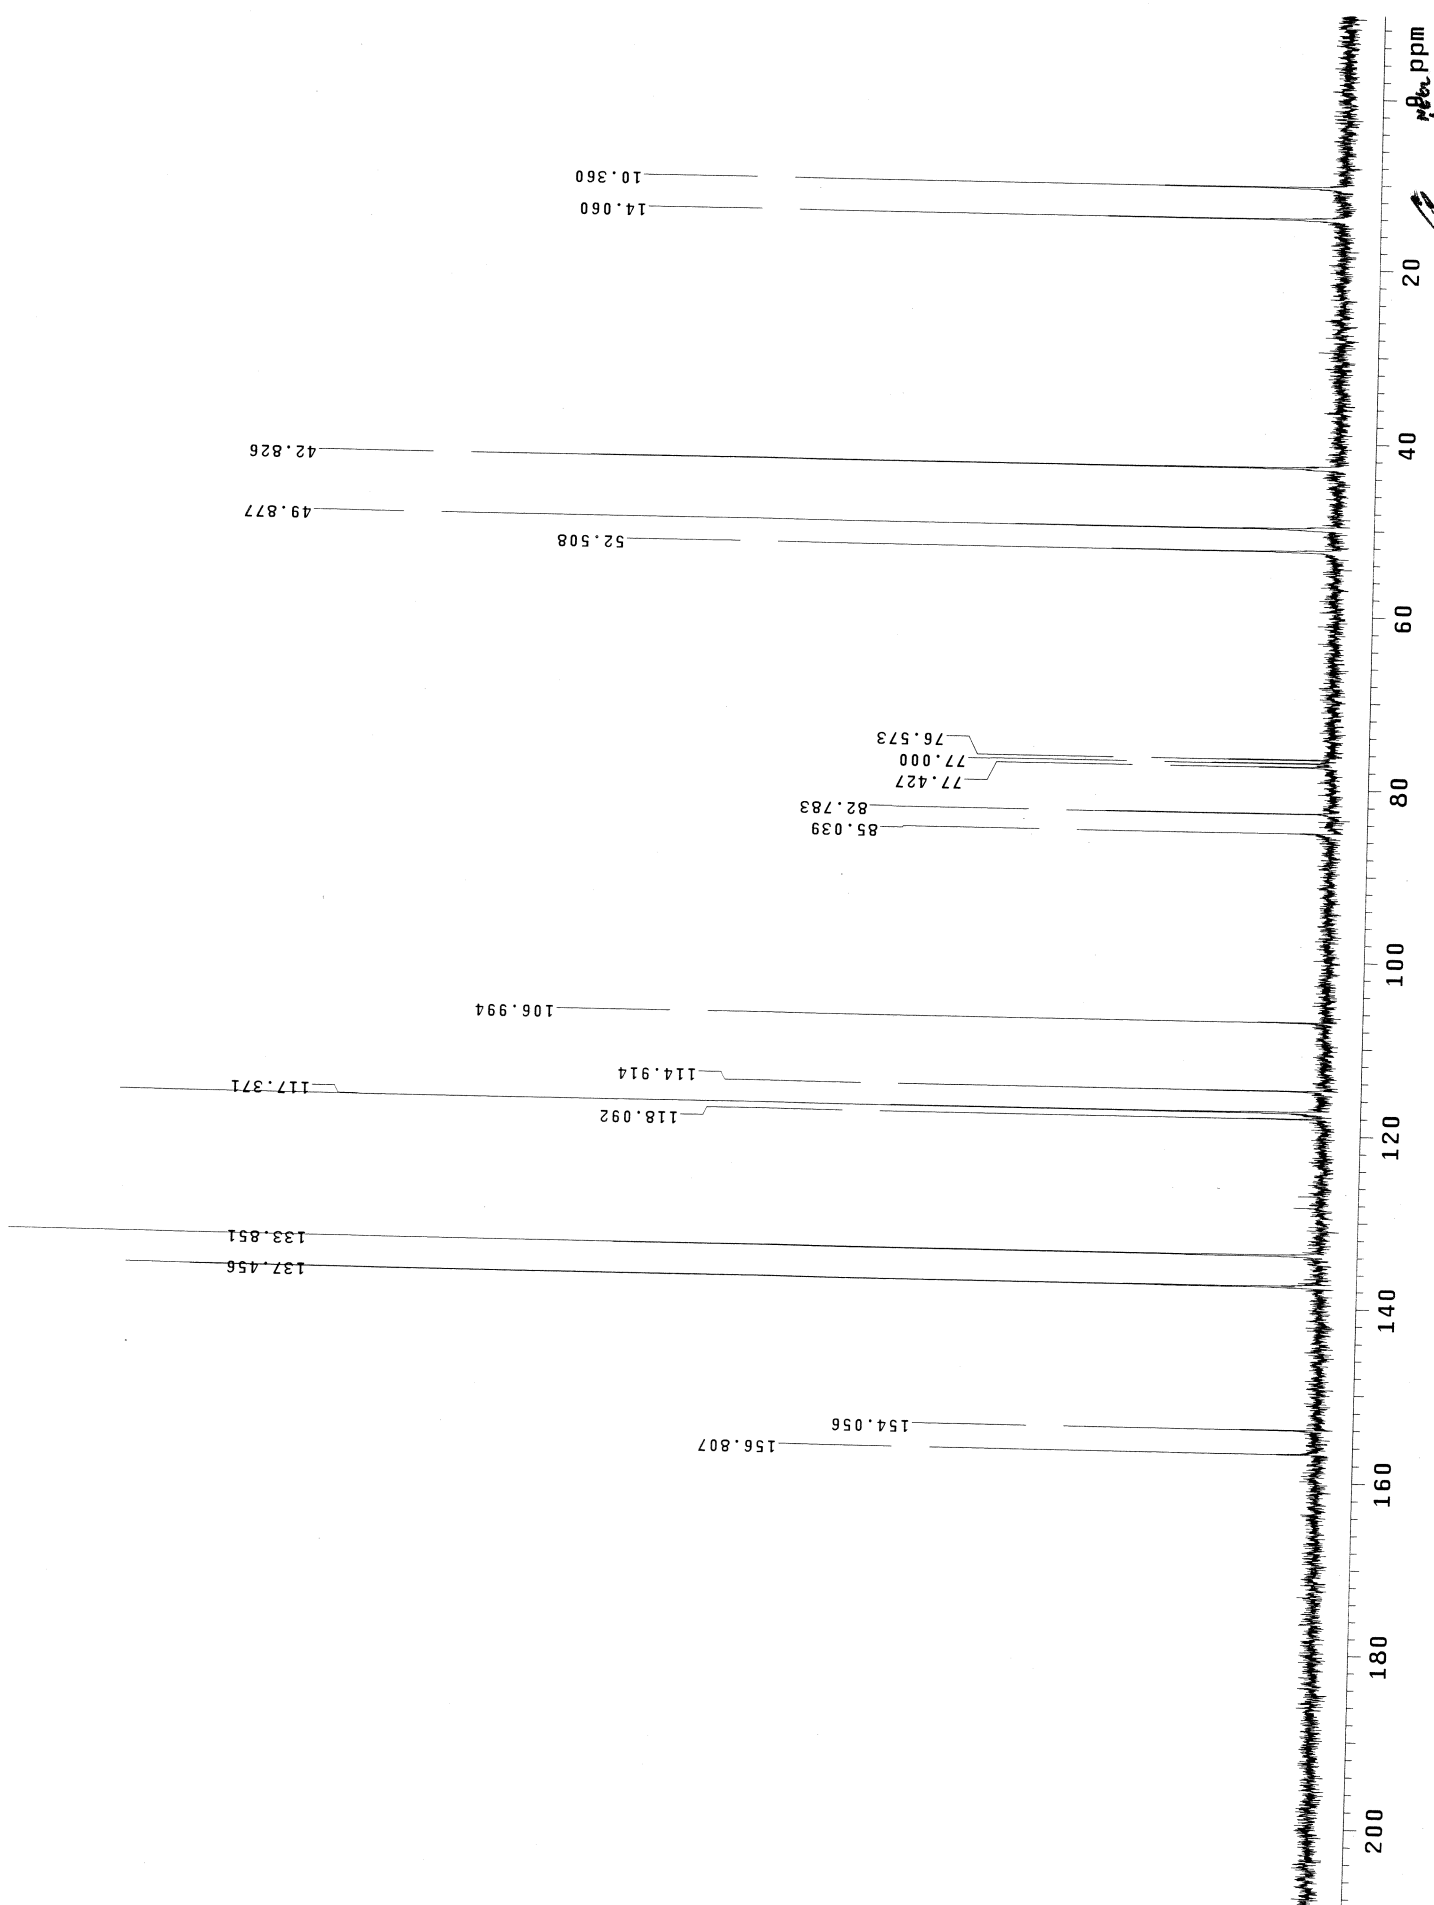

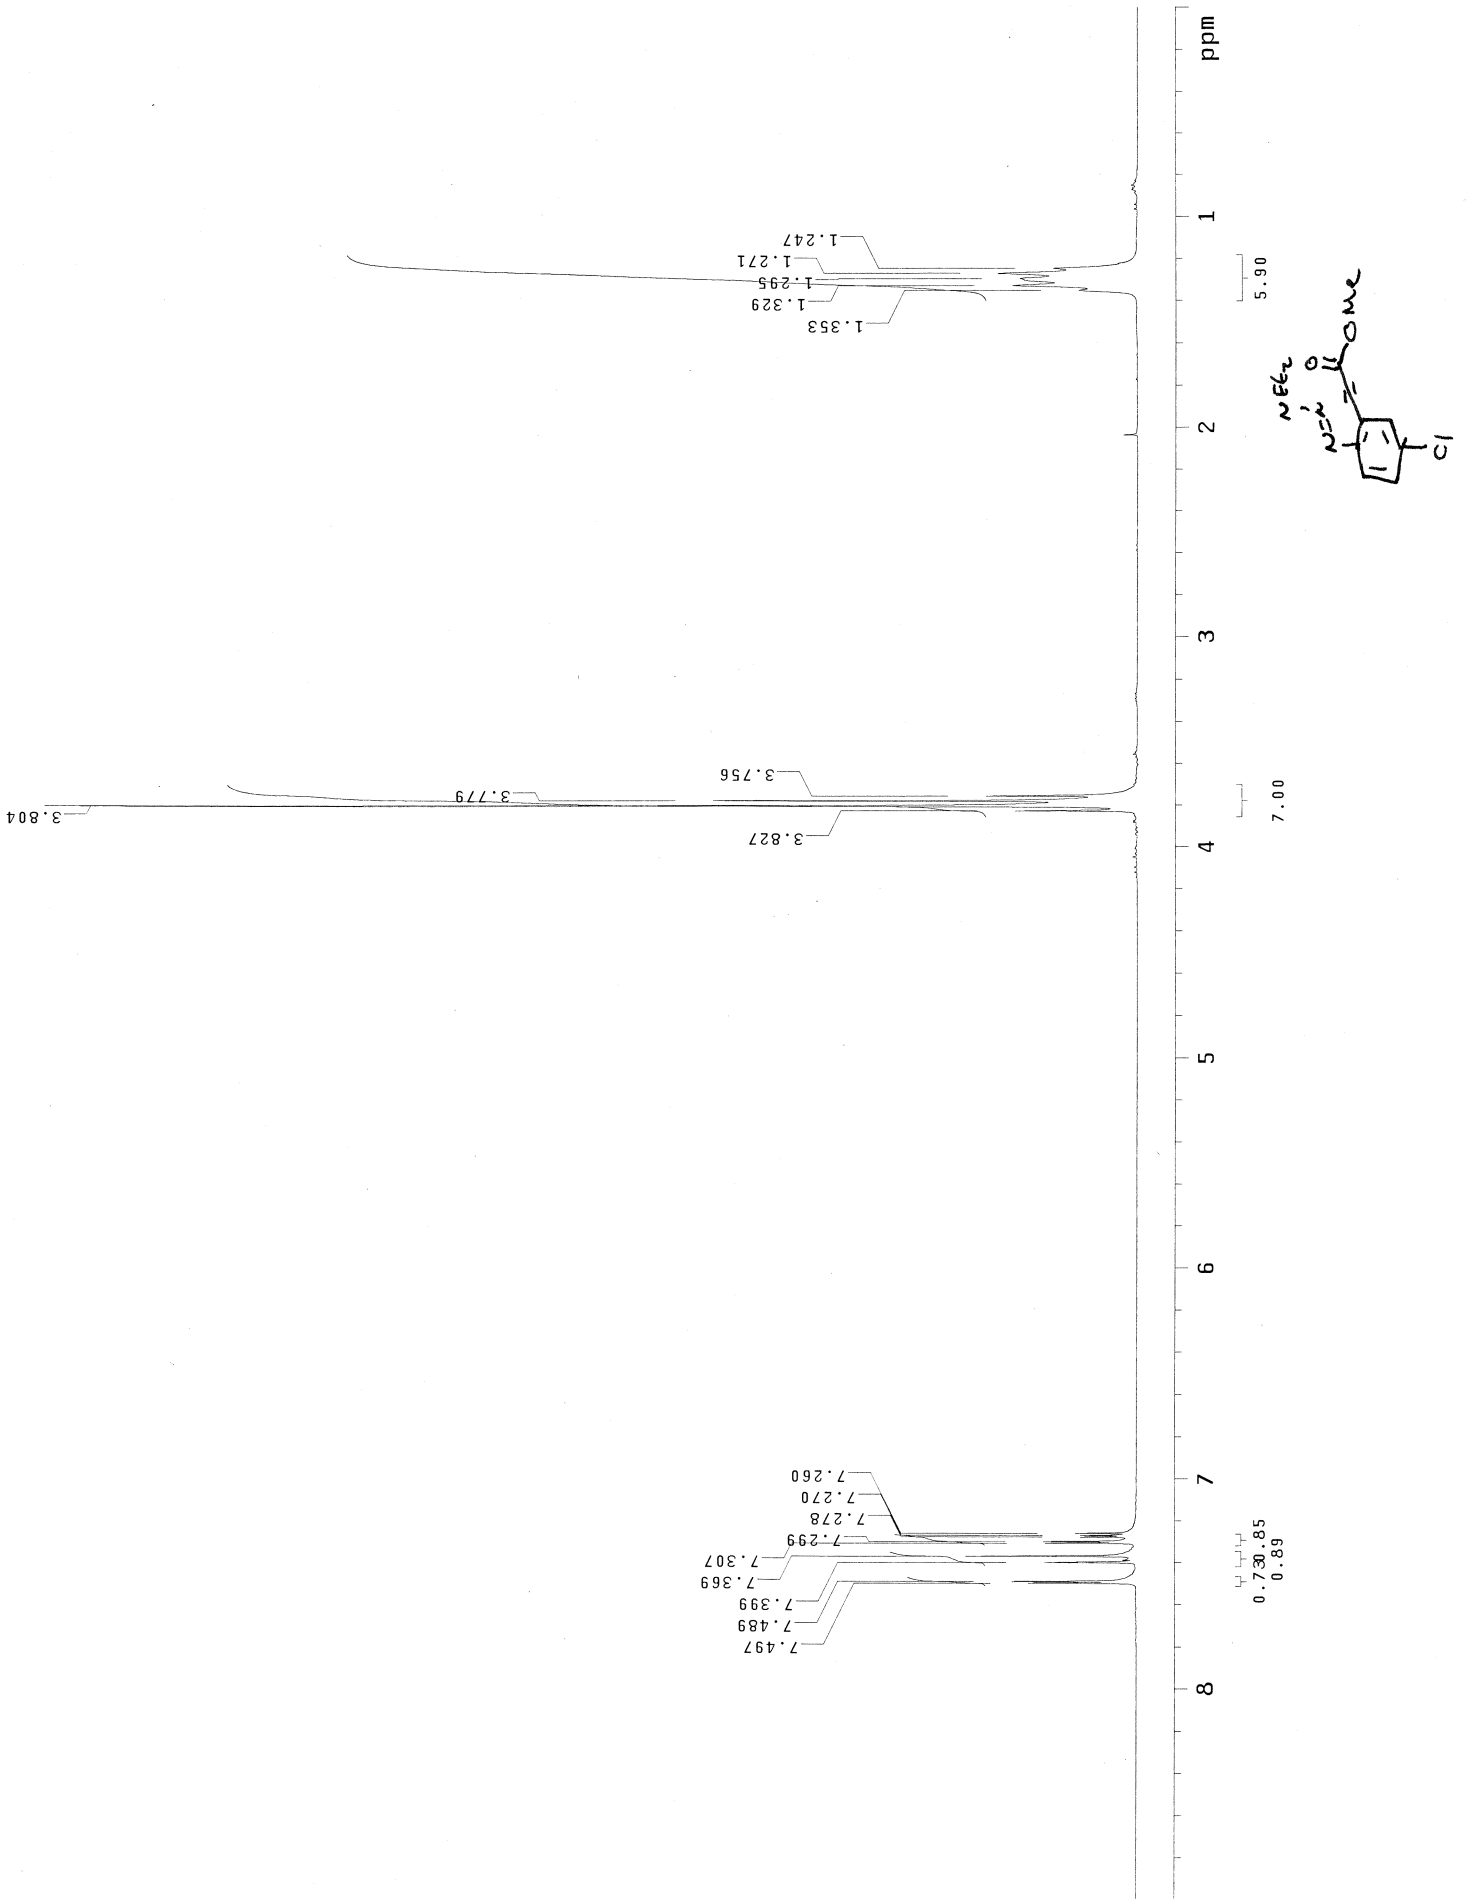

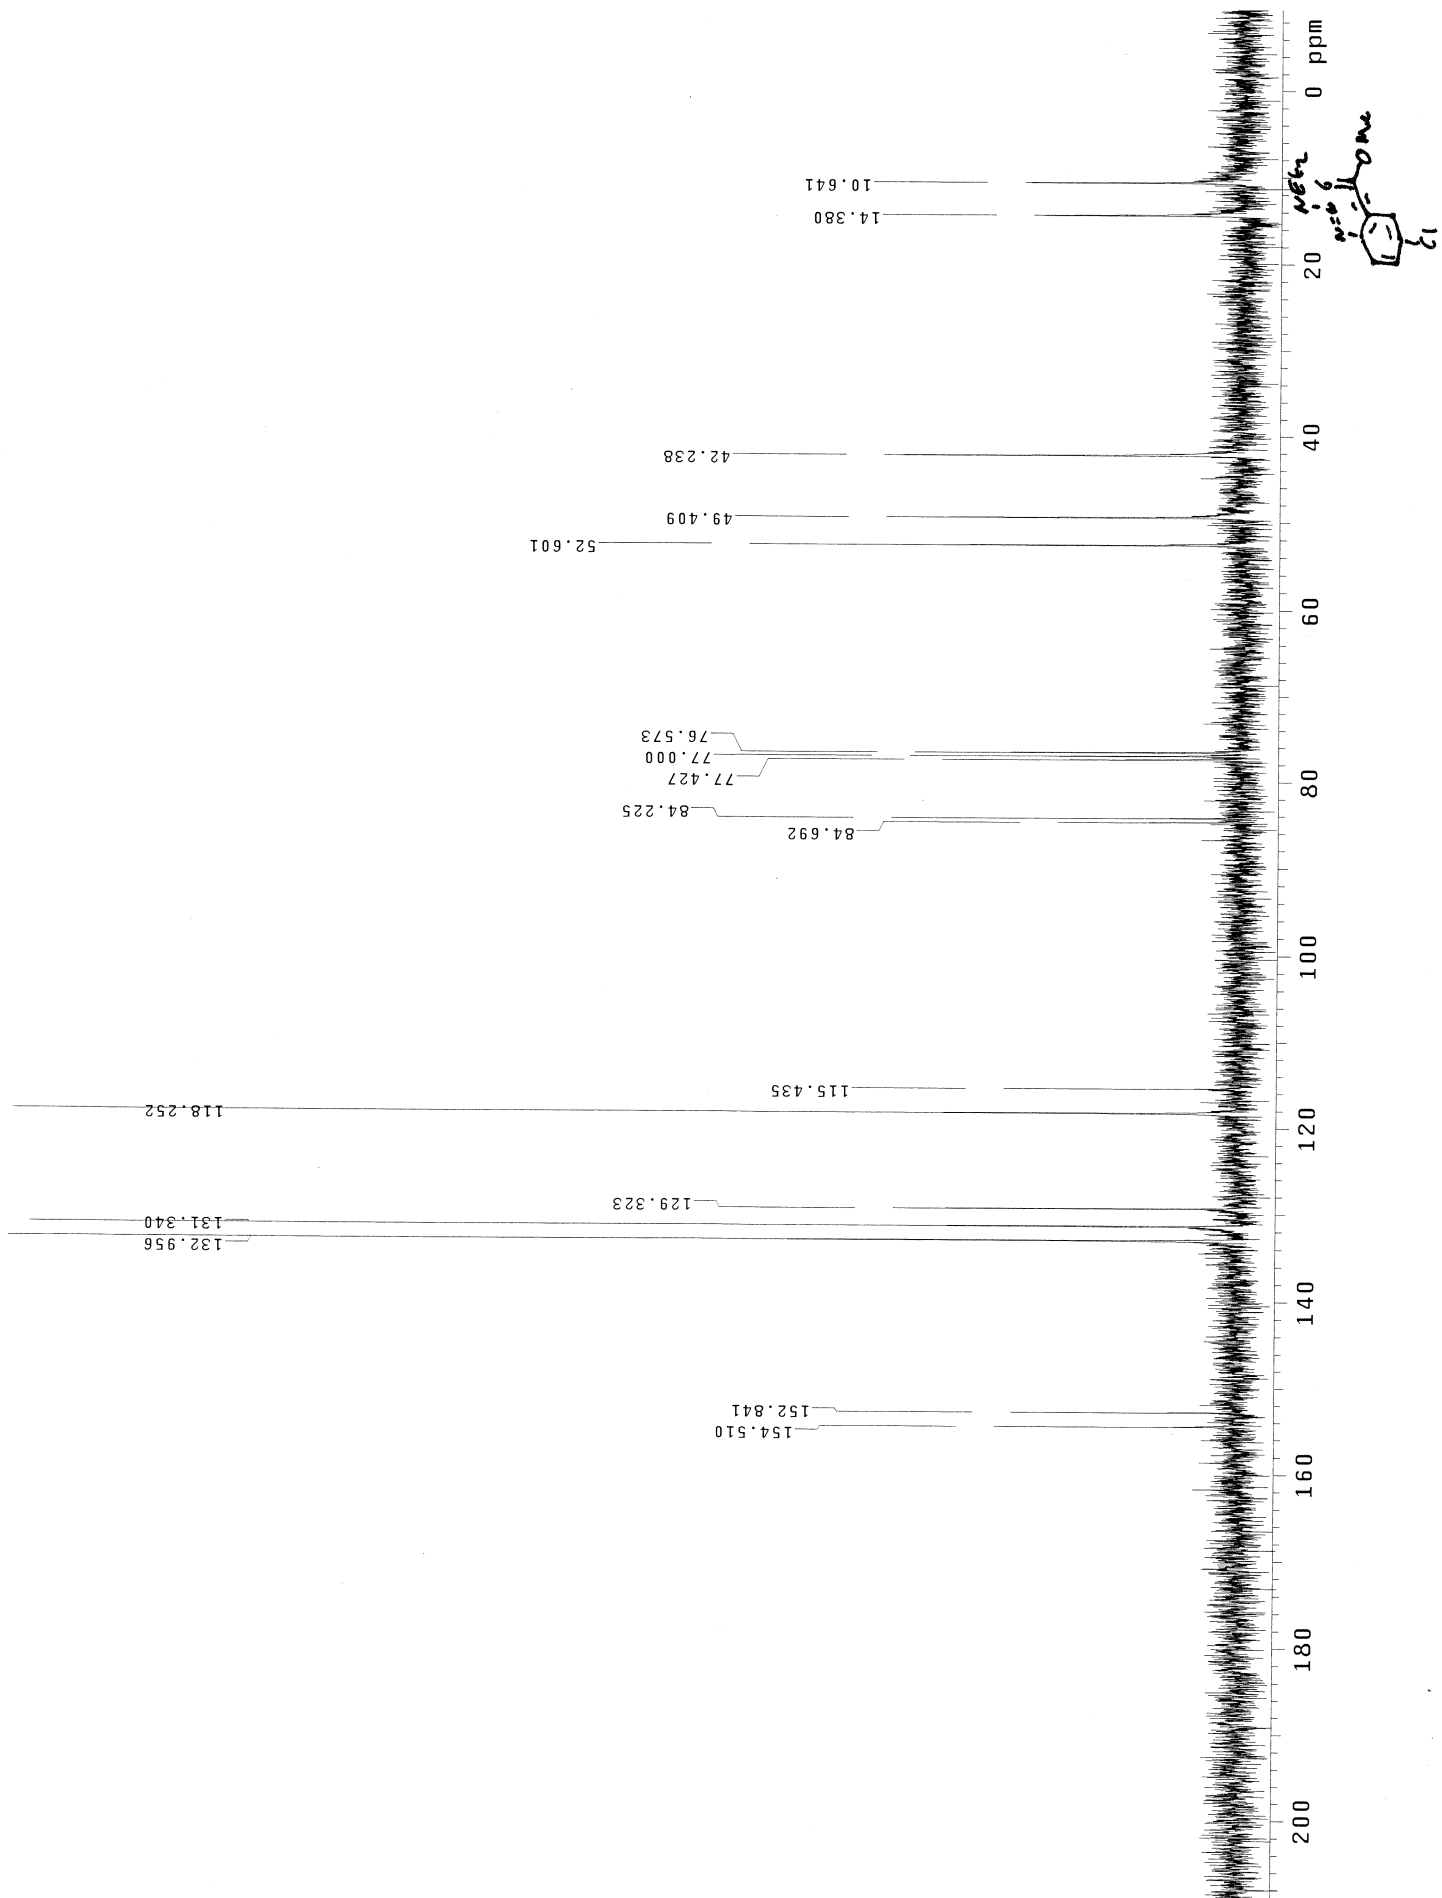

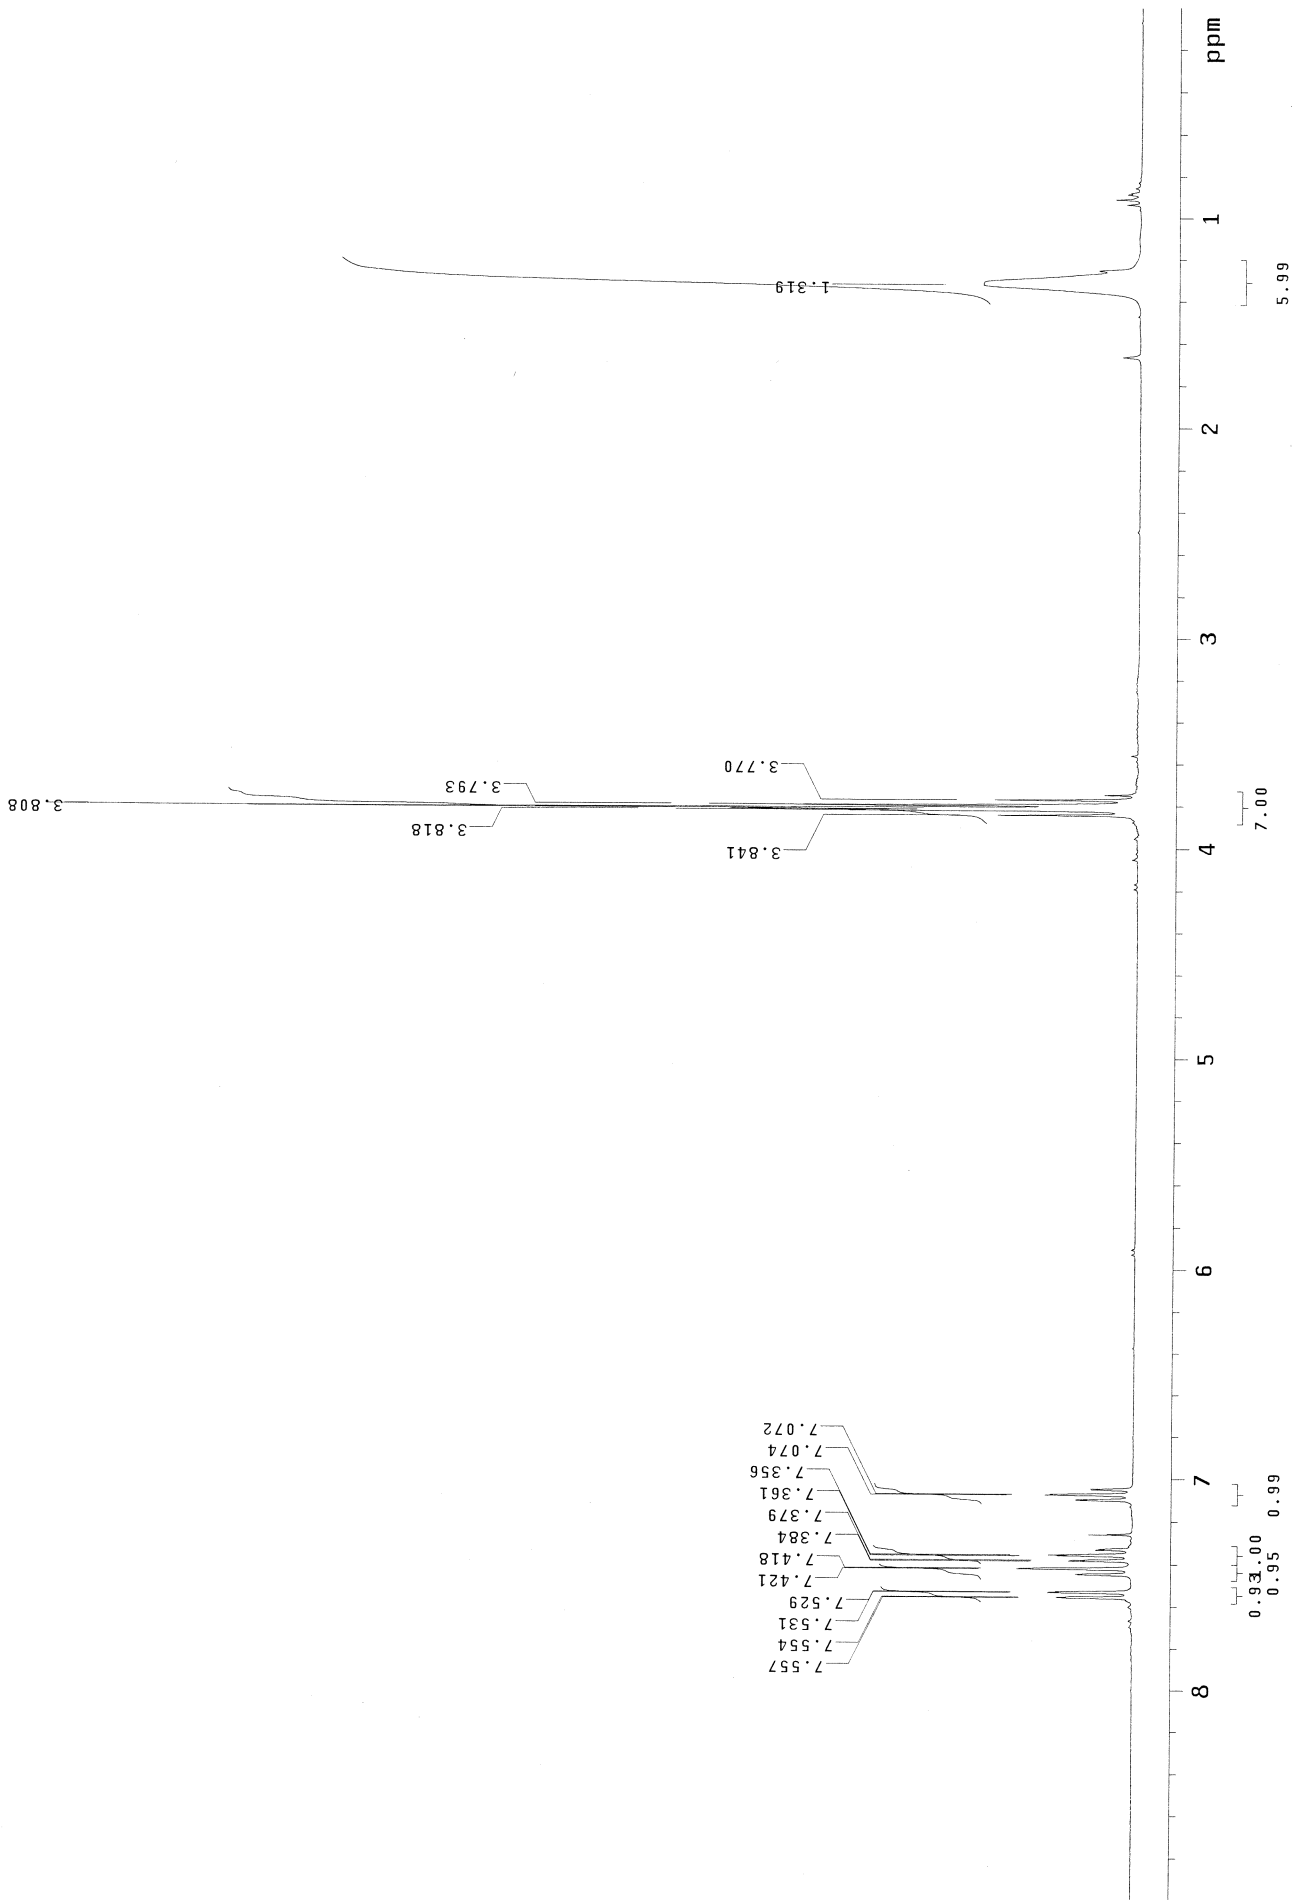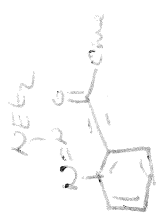

RF

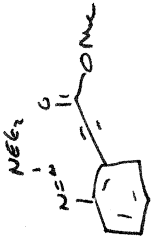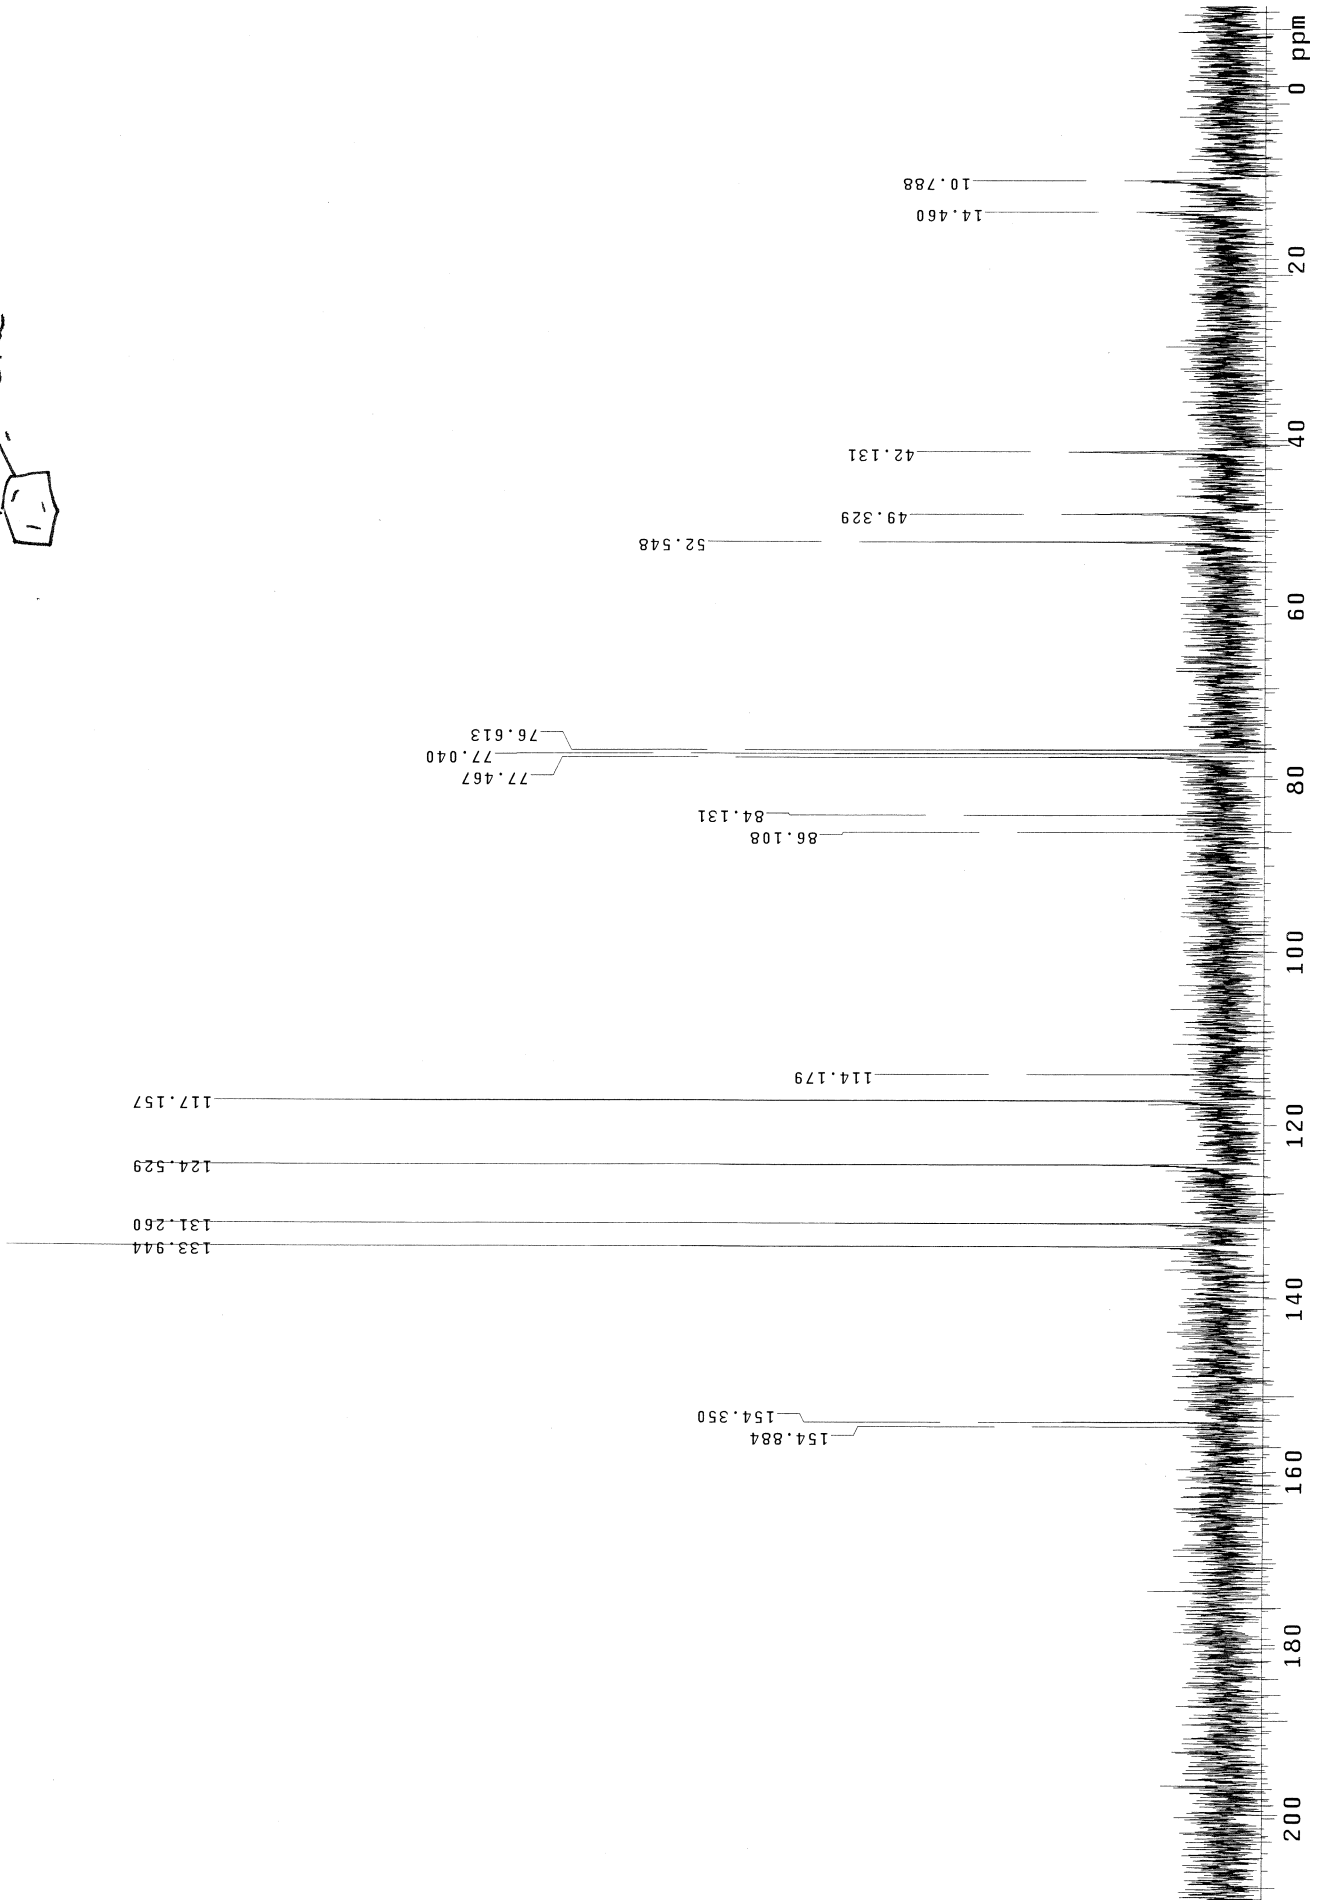

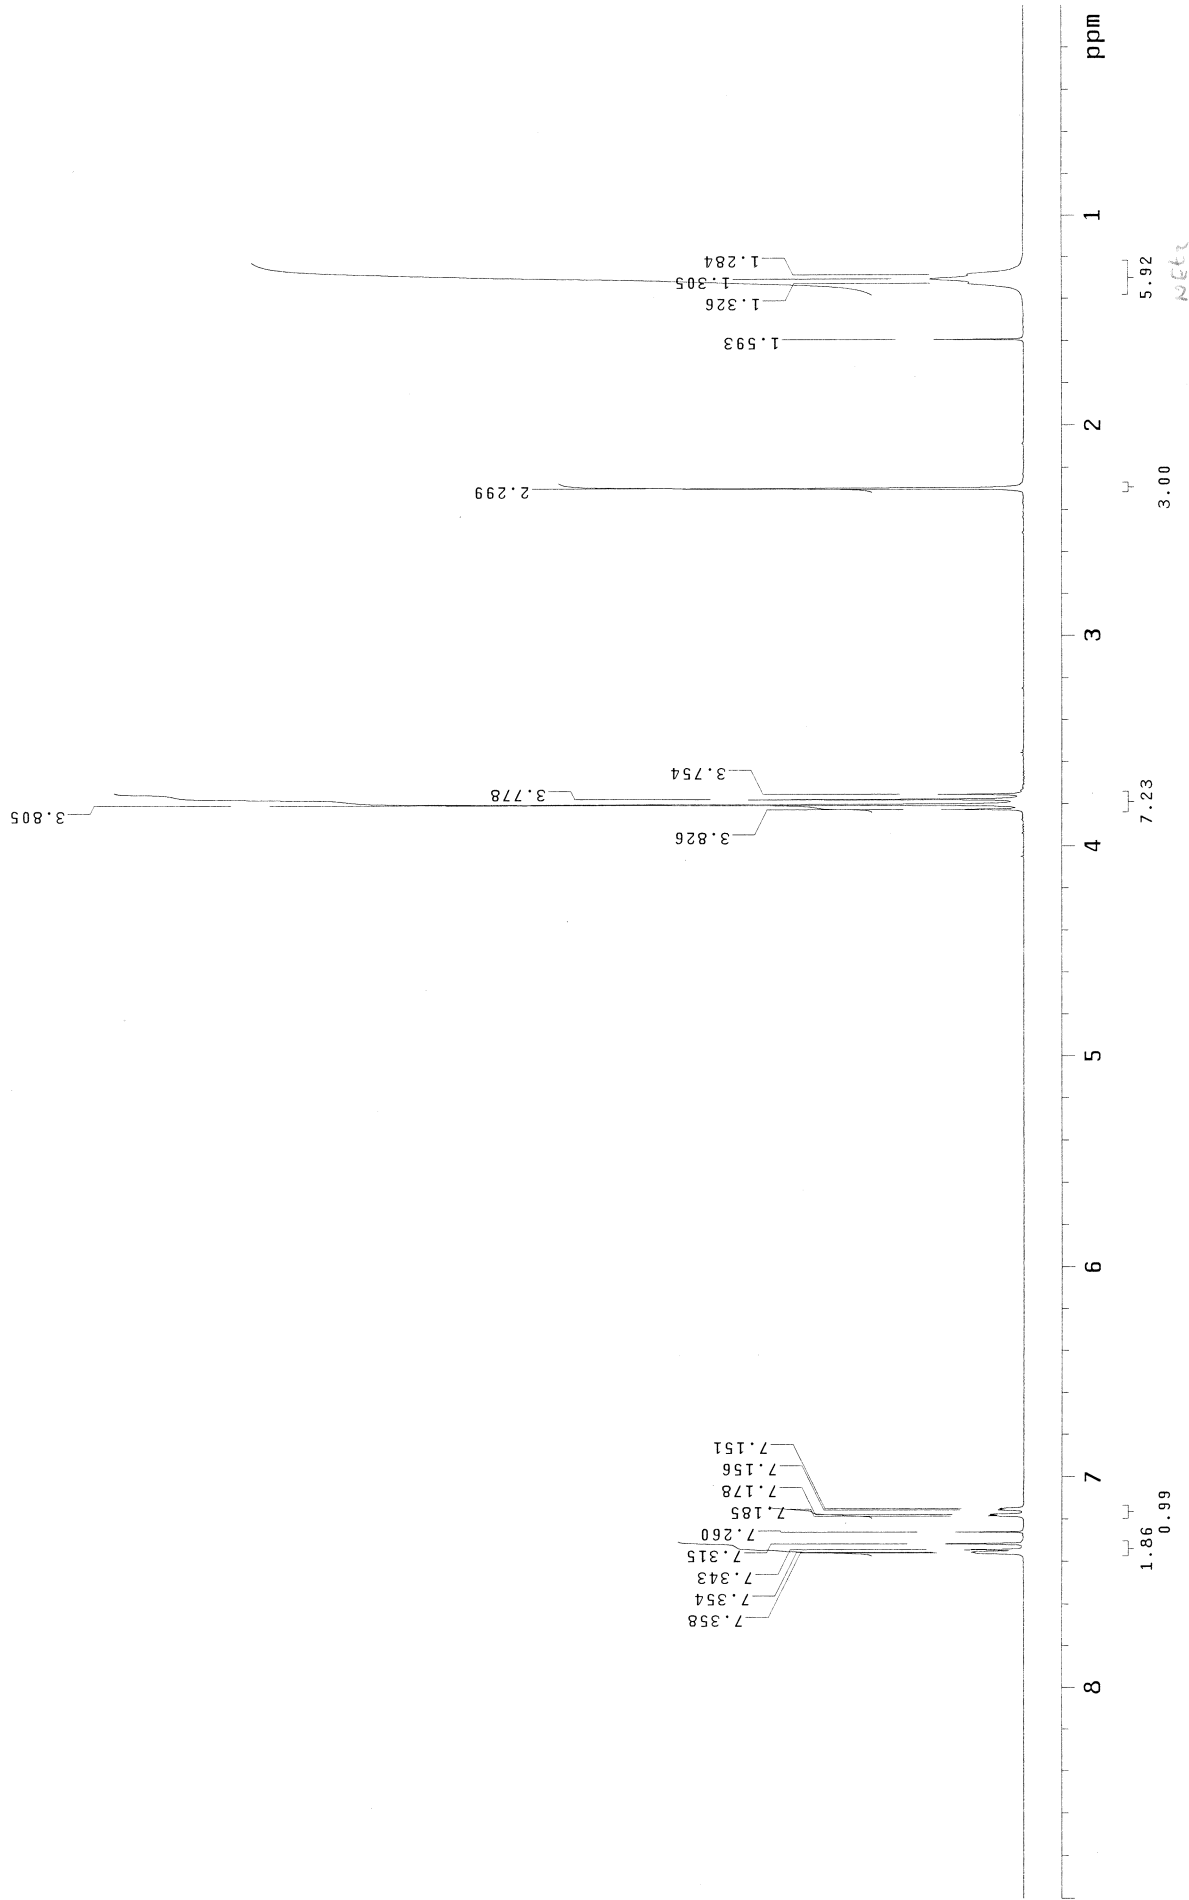



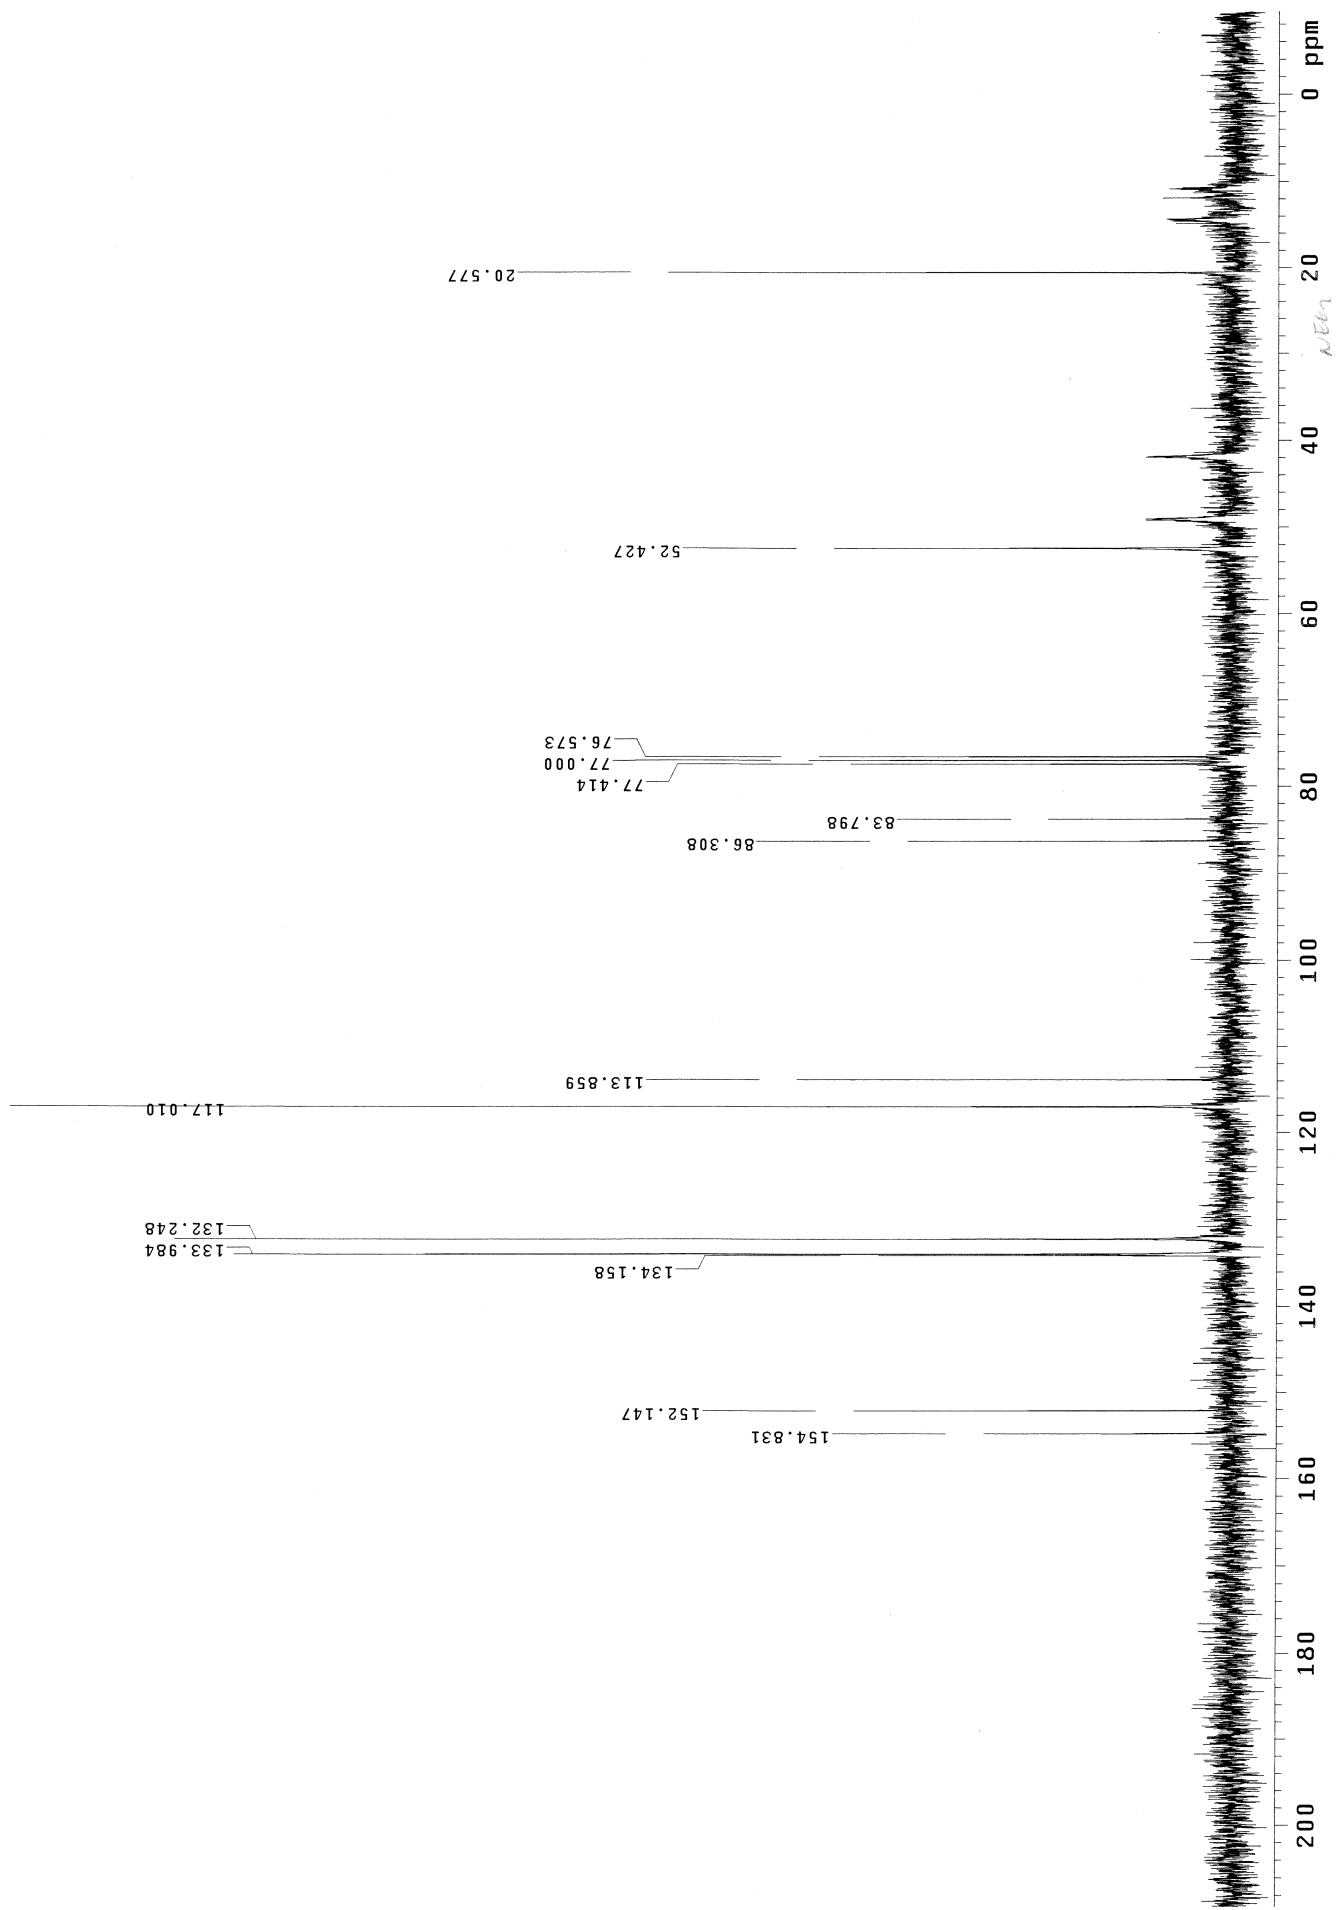

g9

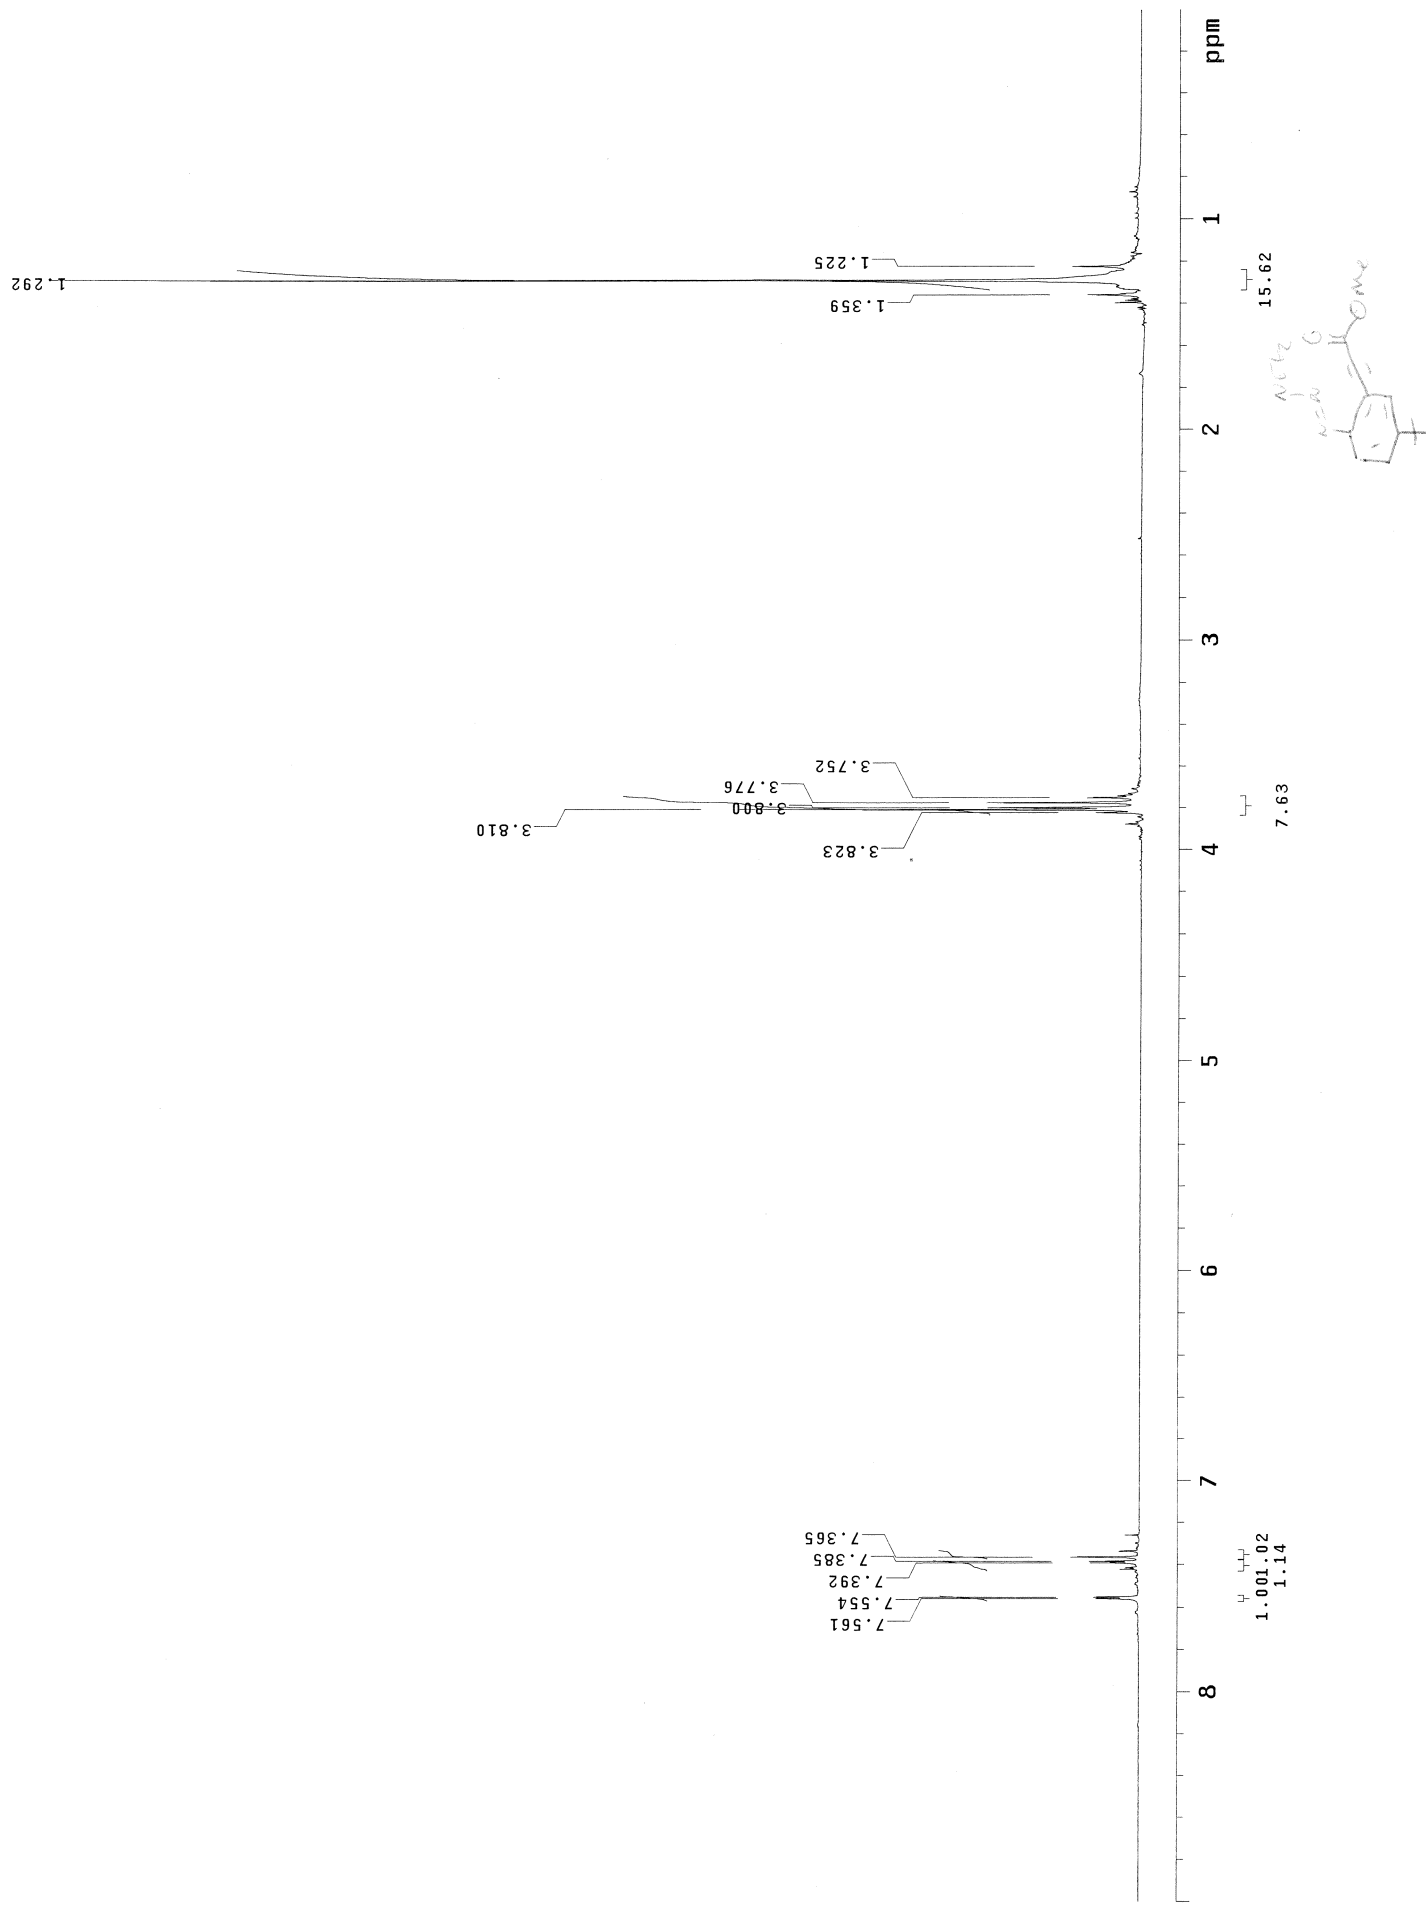

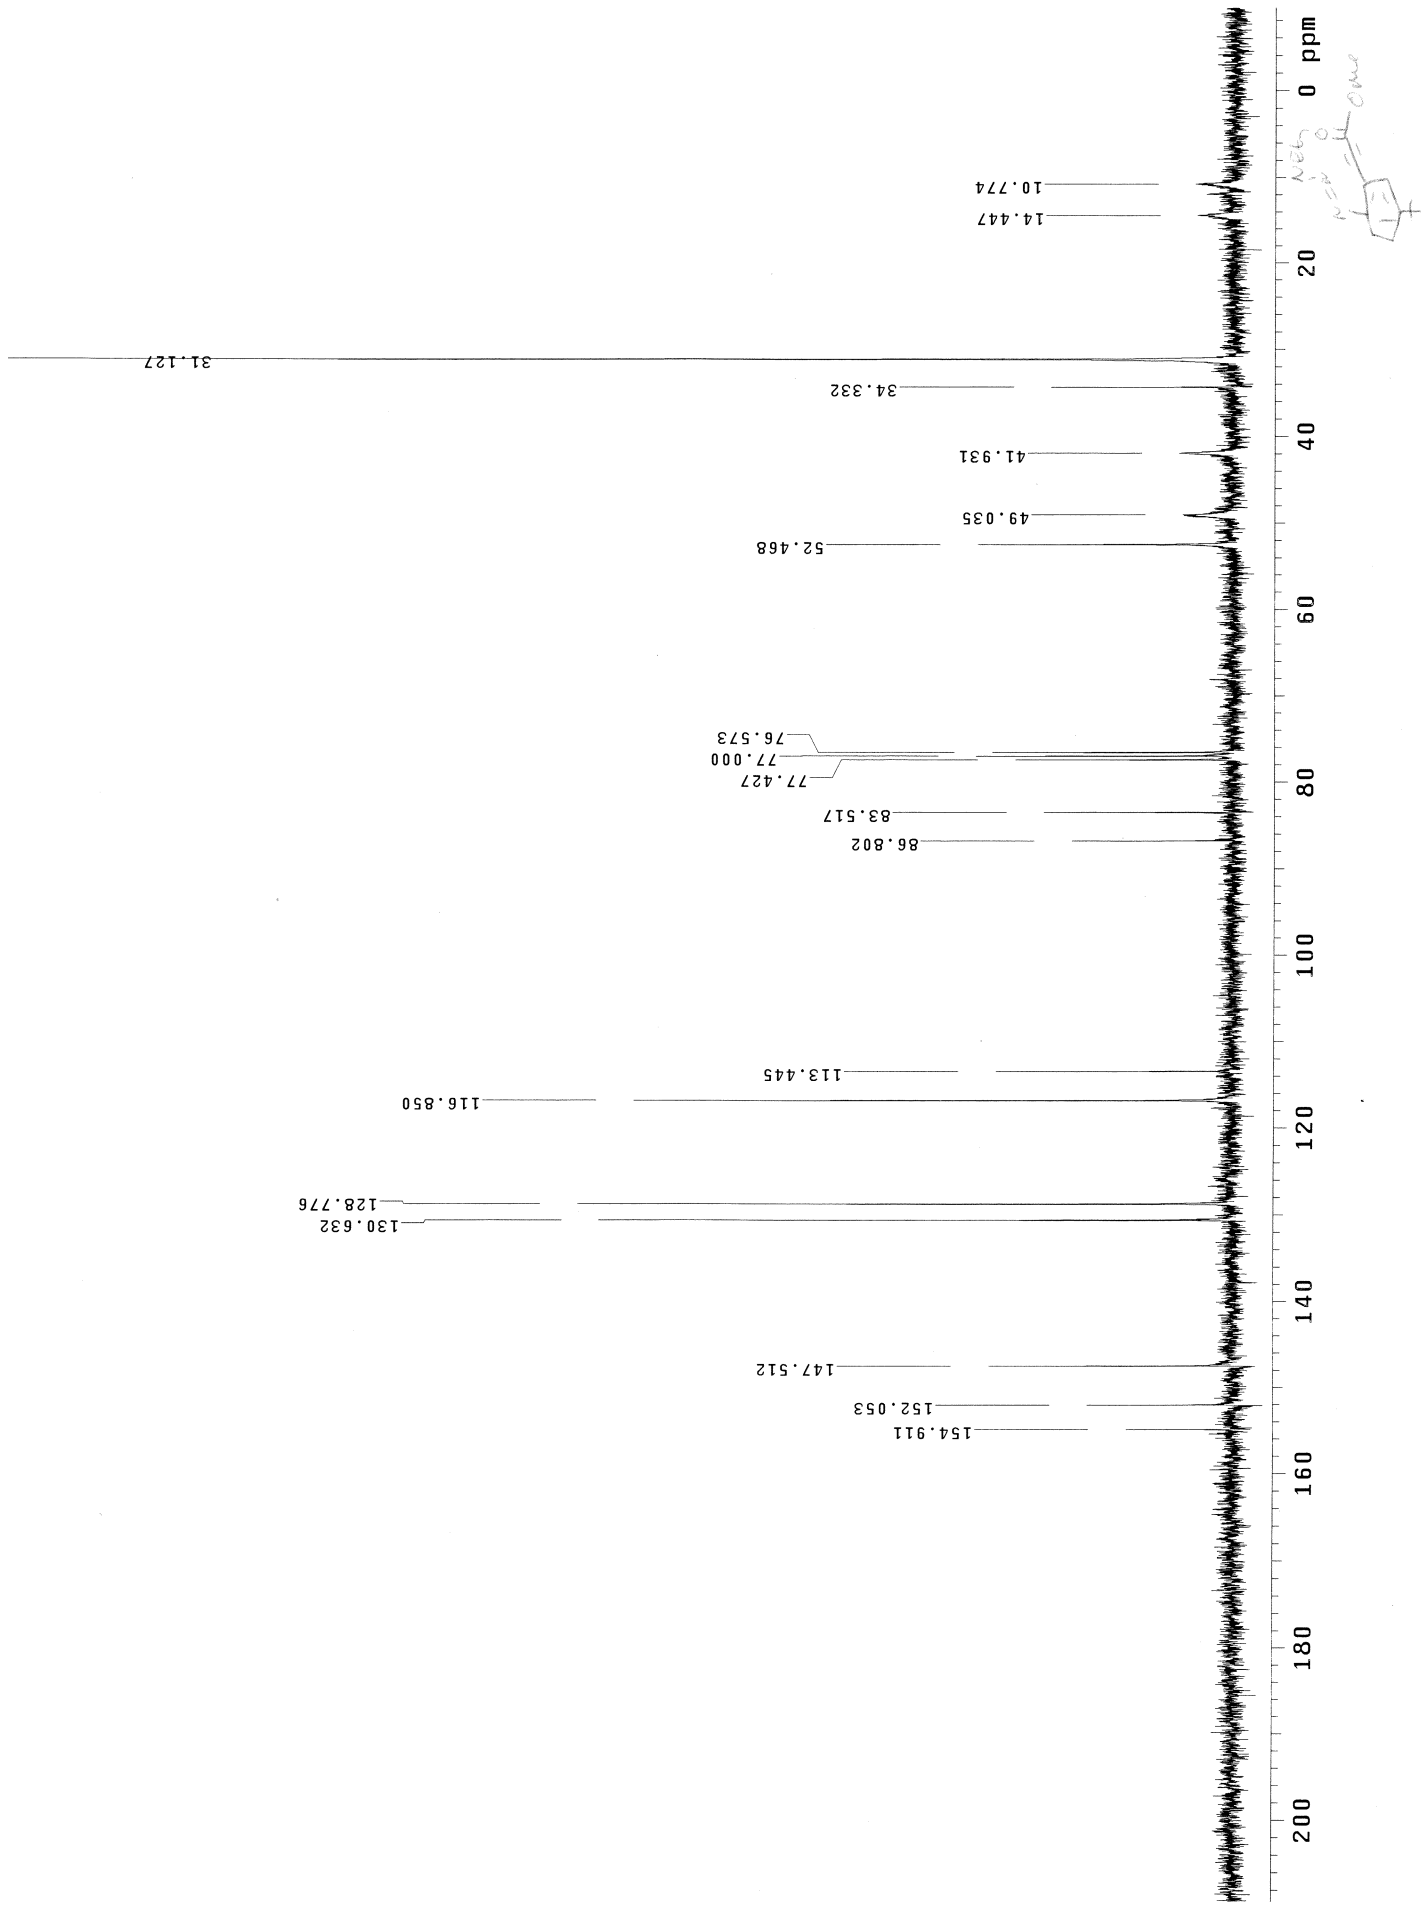

6h

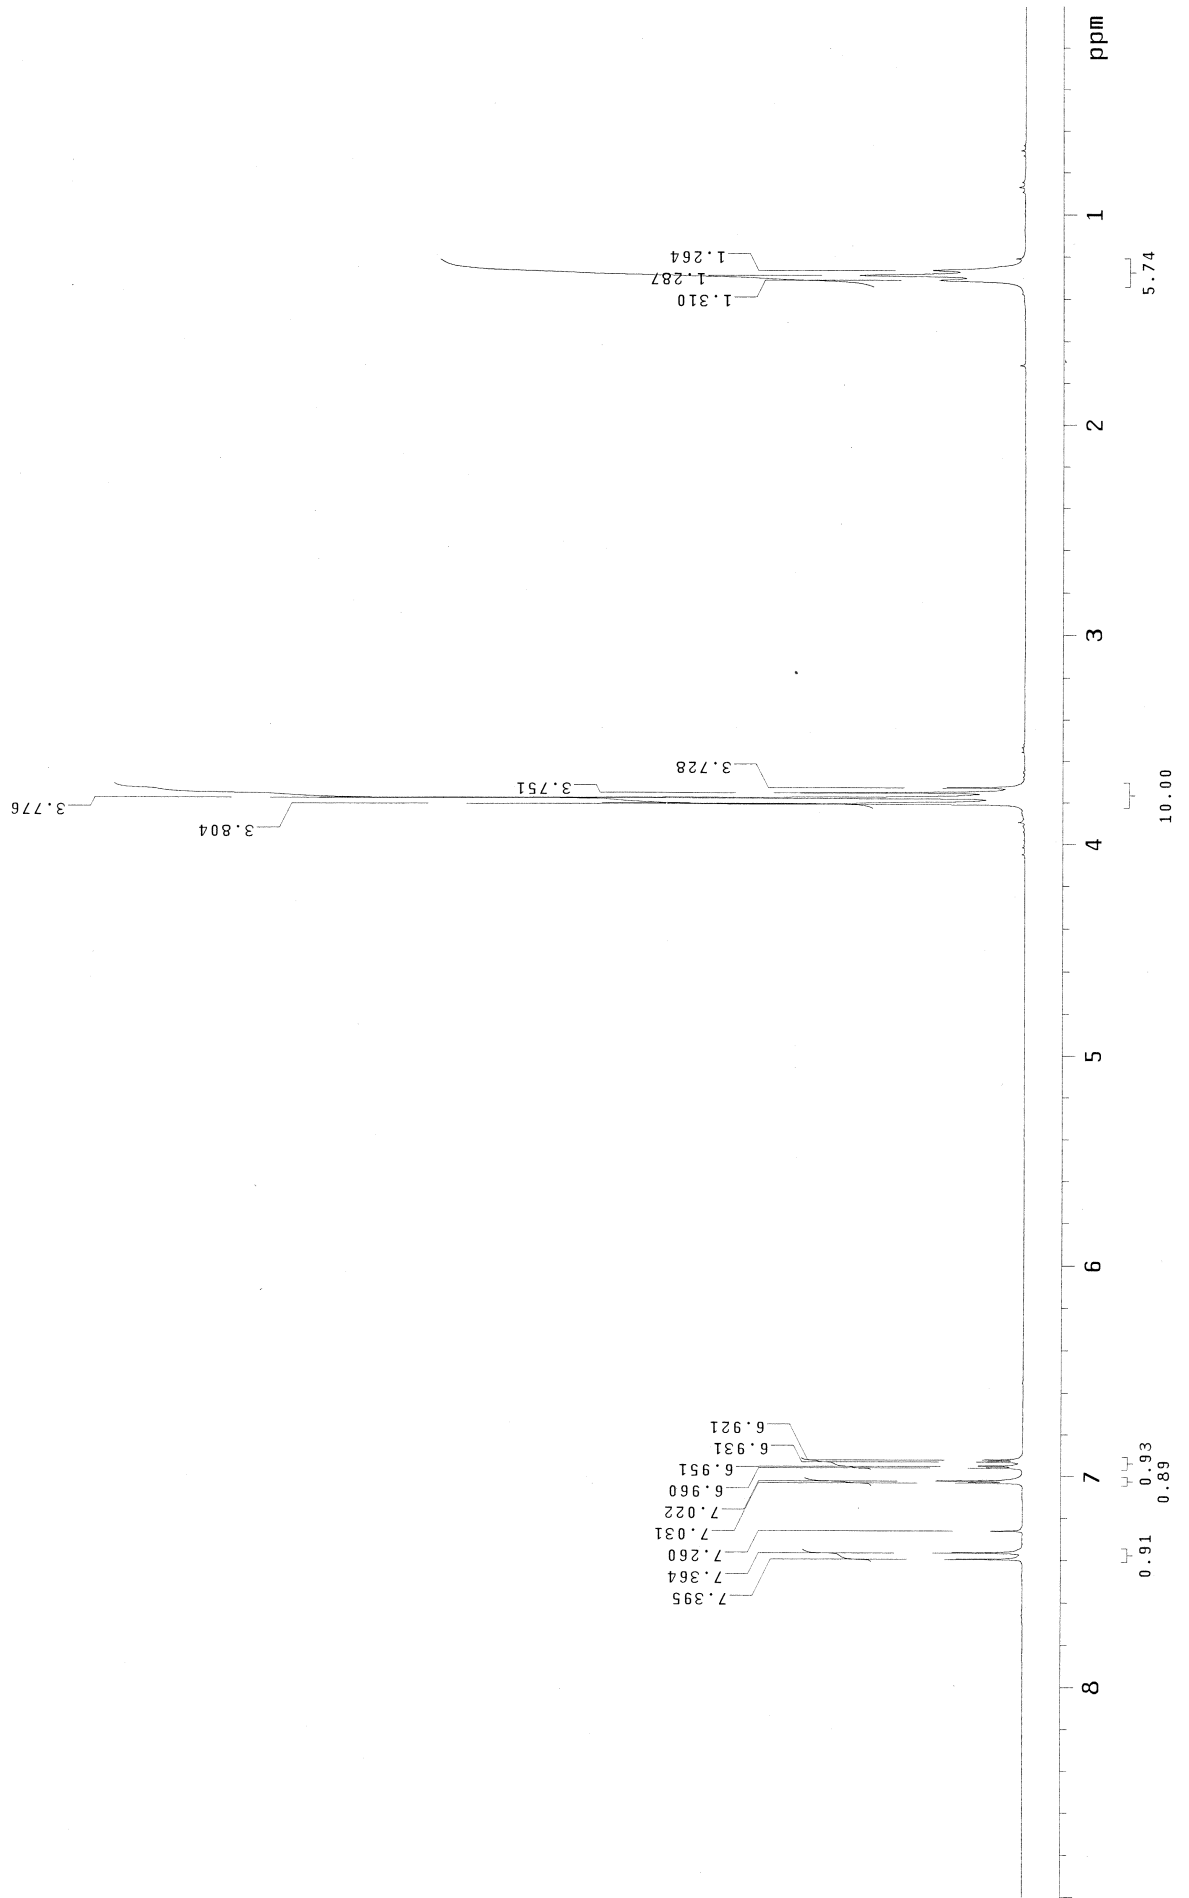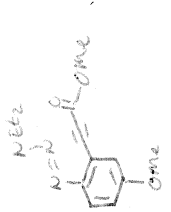

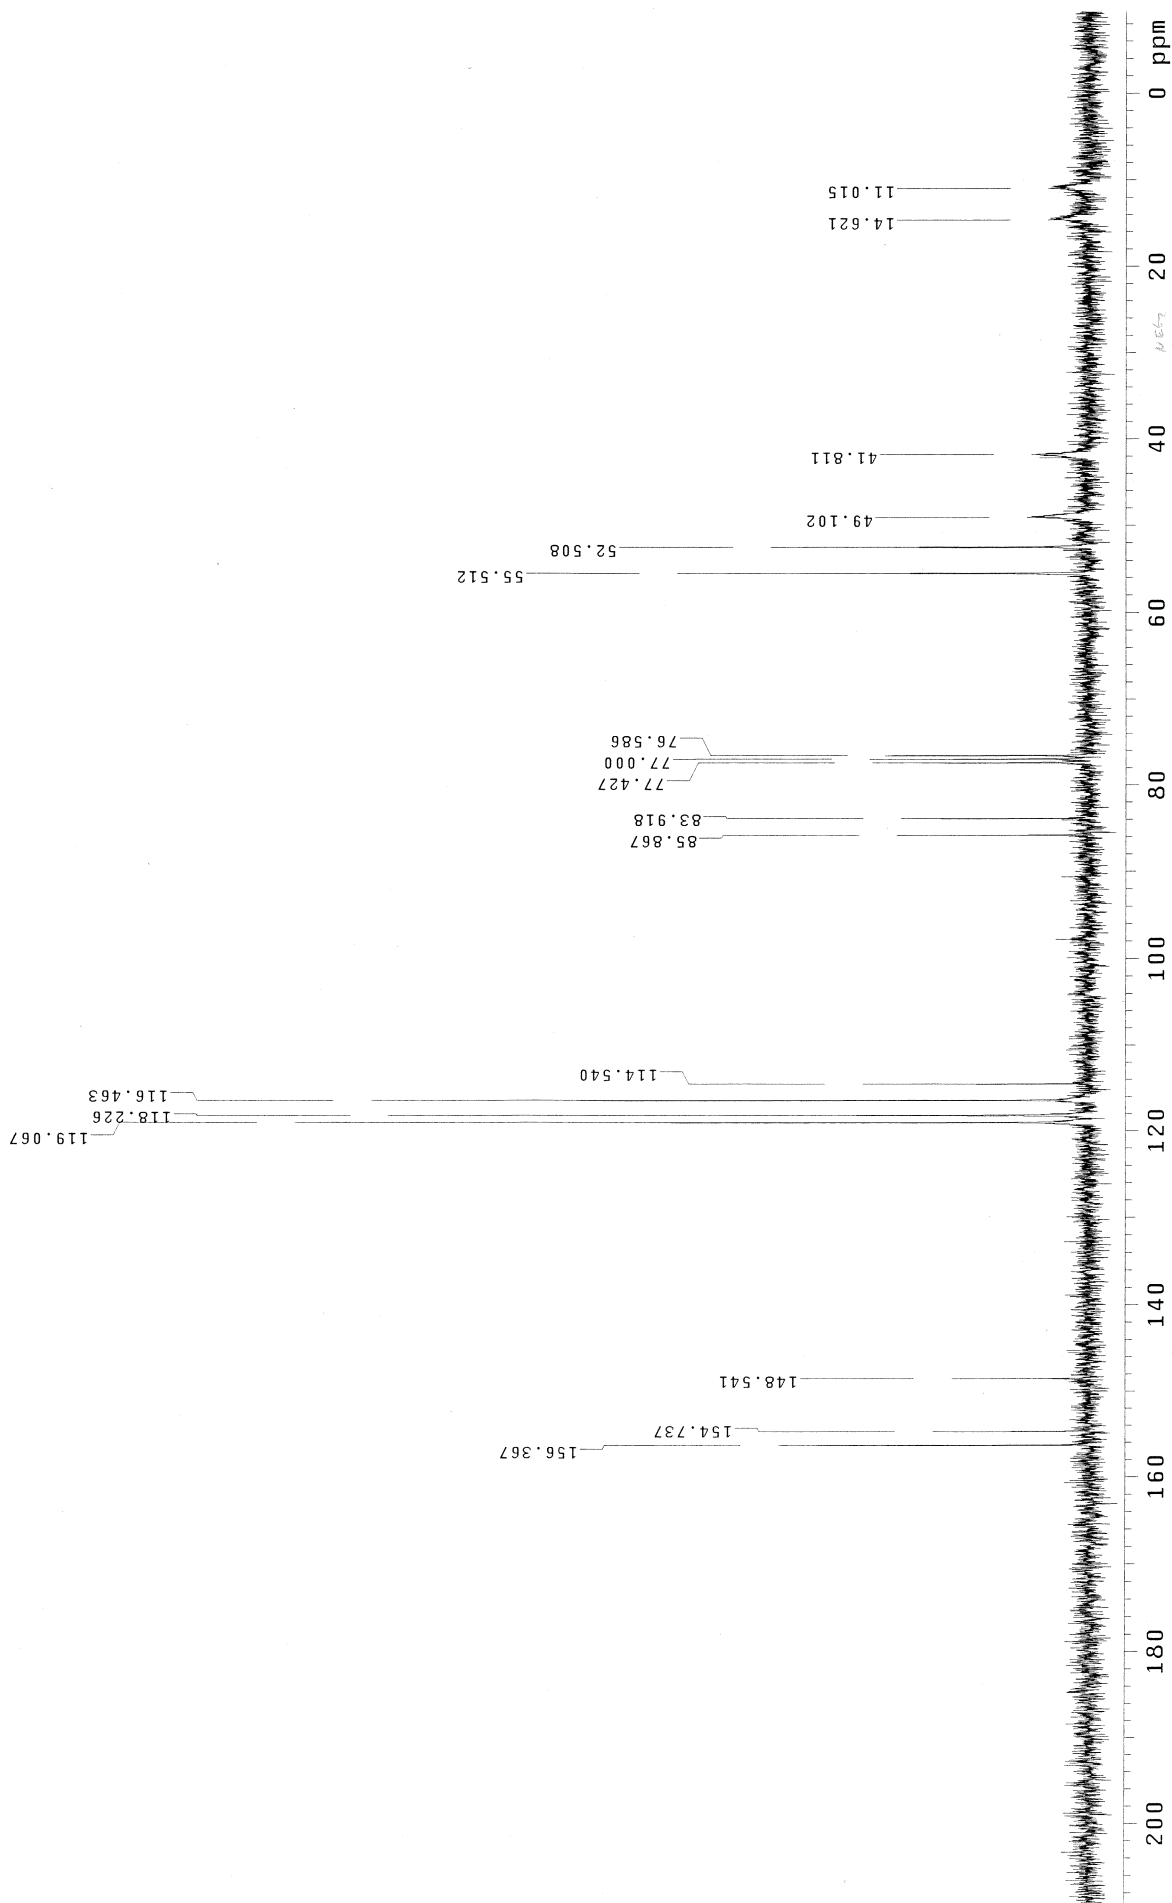

9a

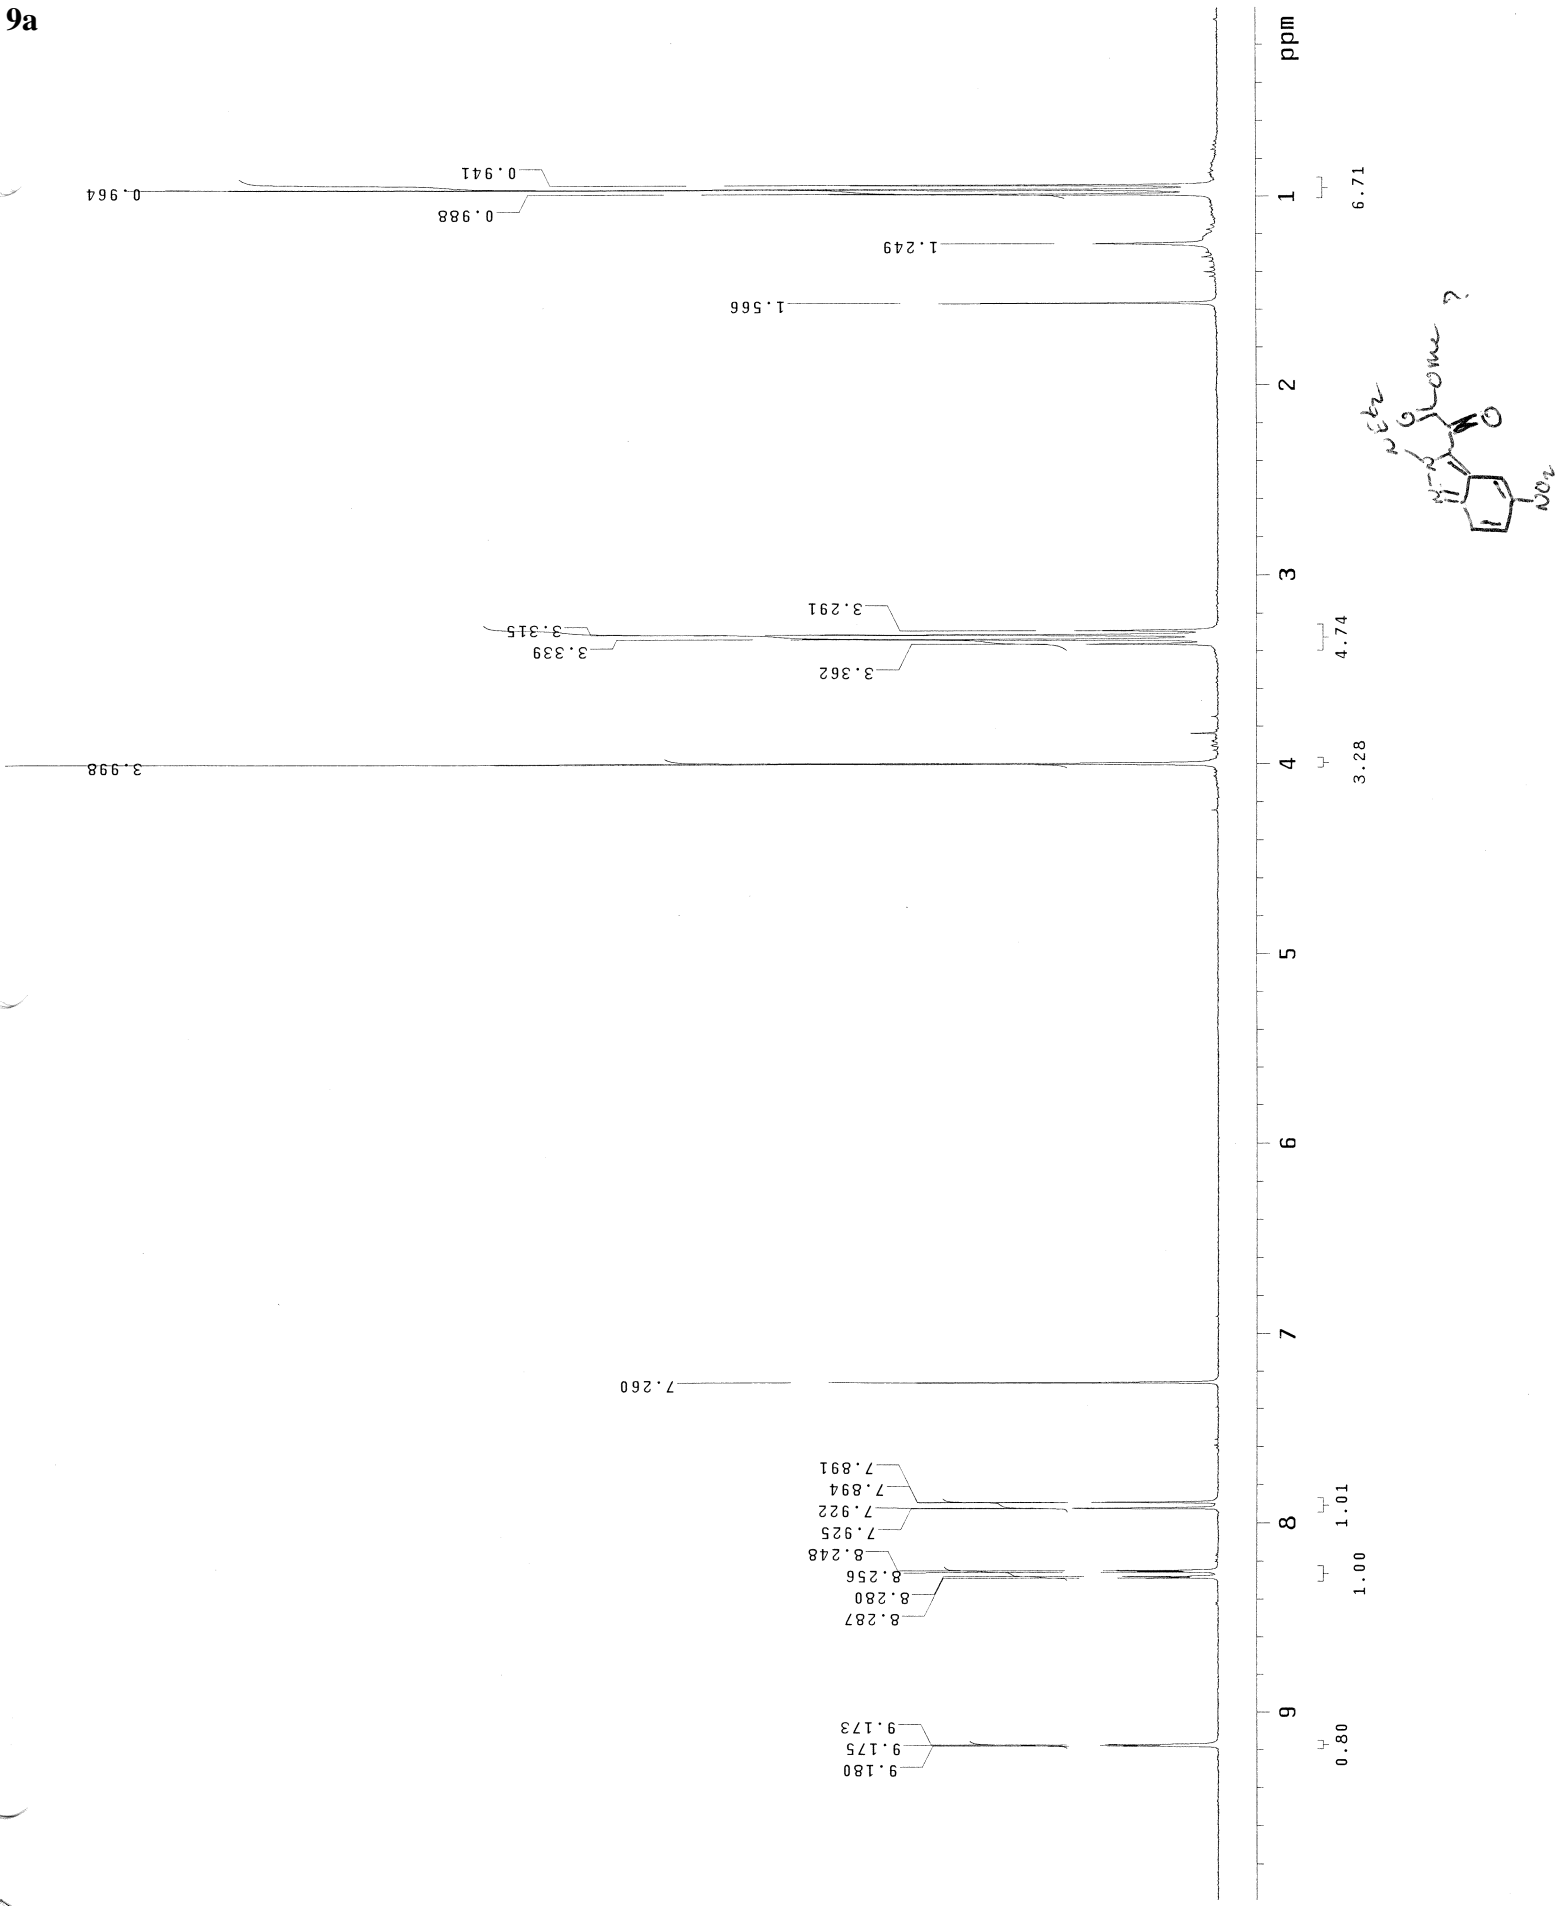

9a

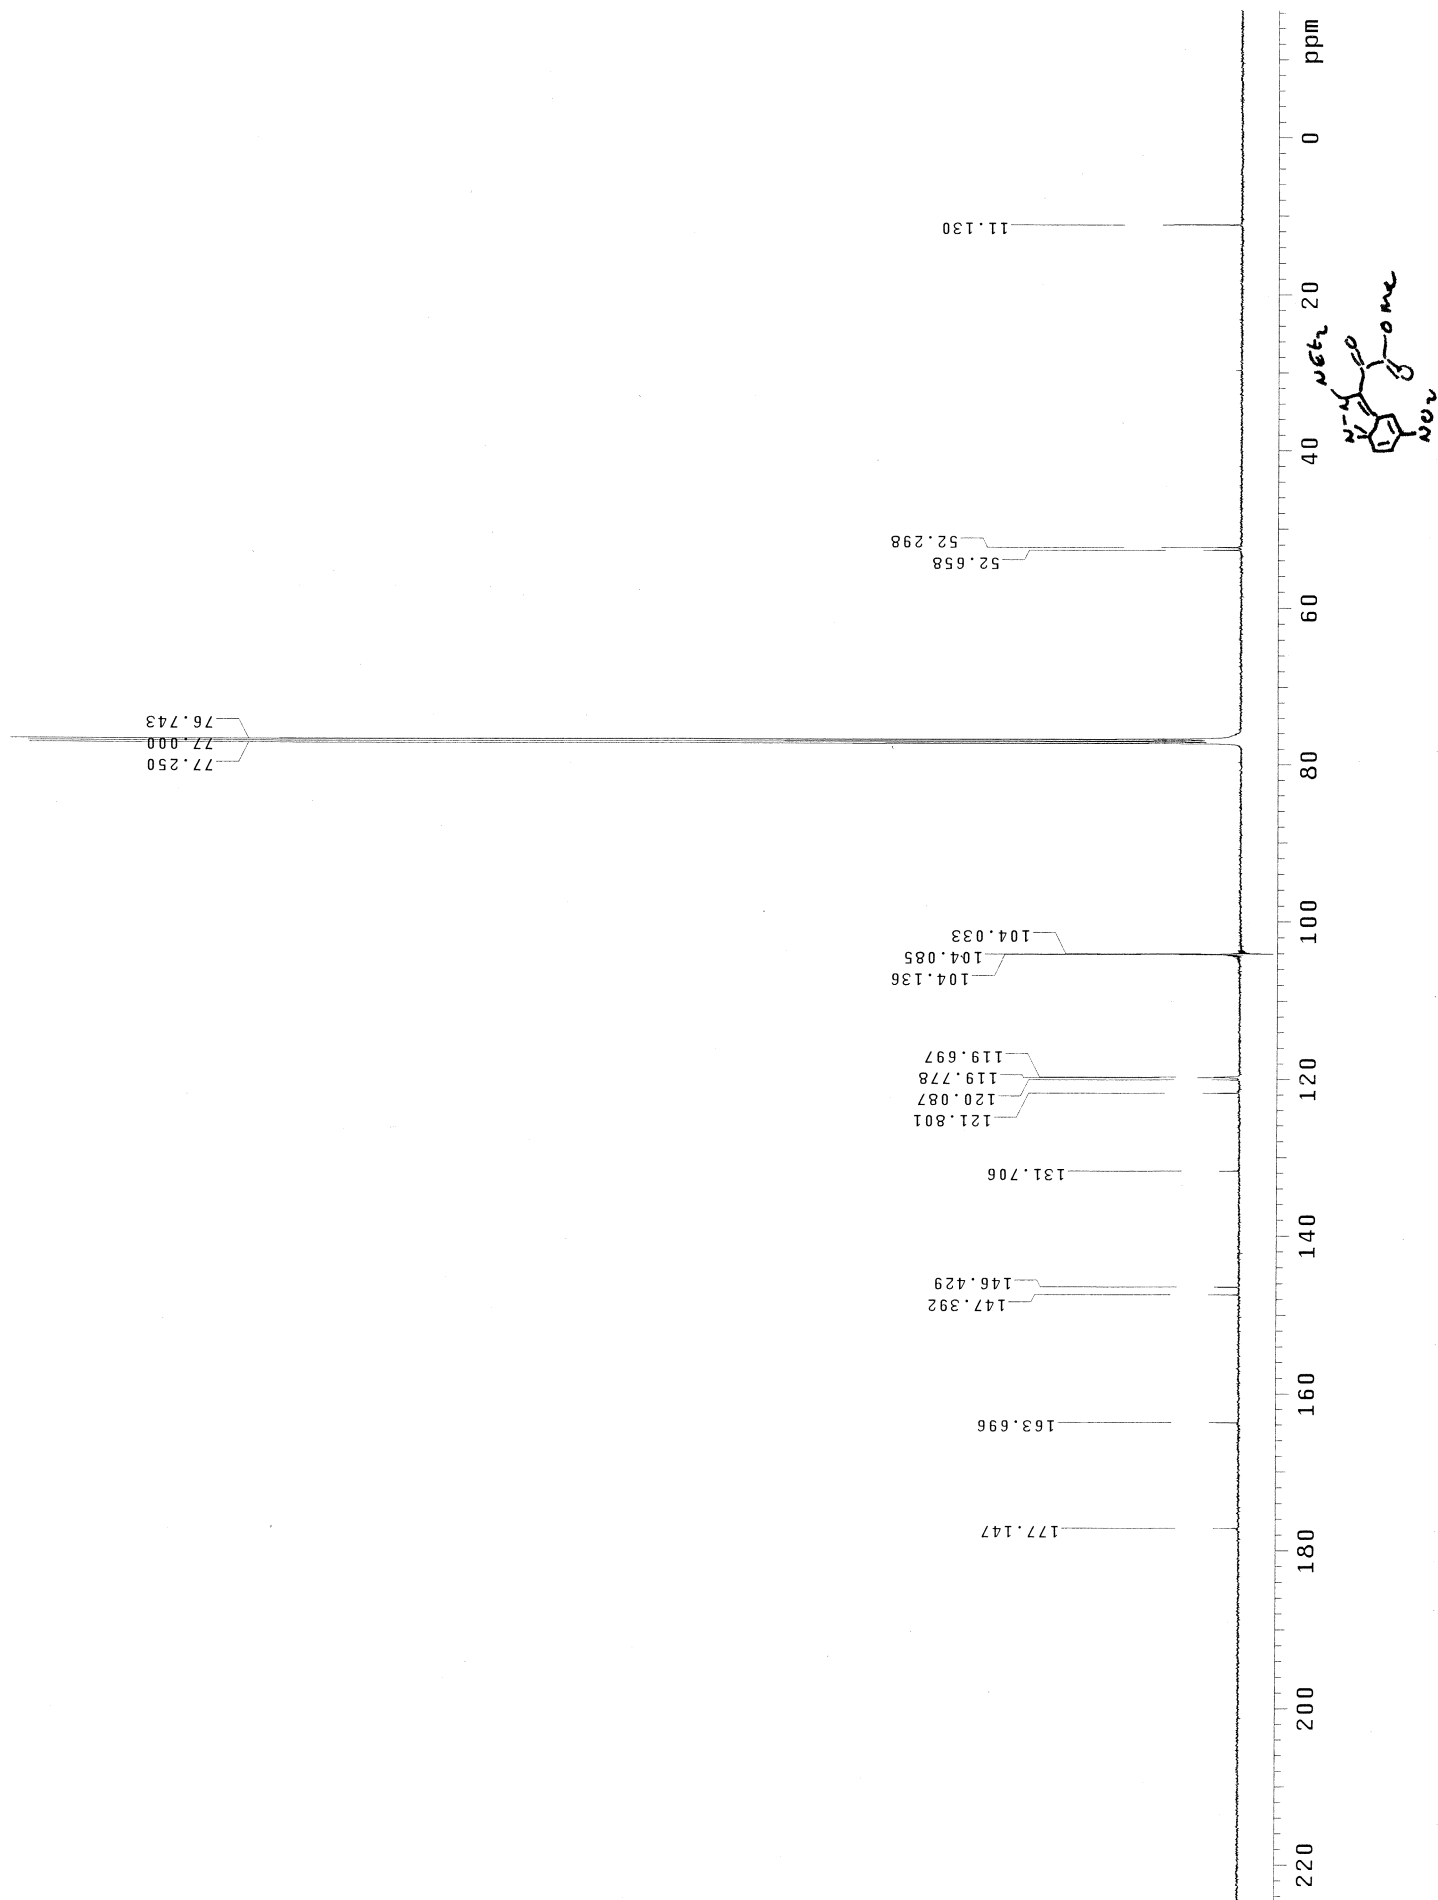

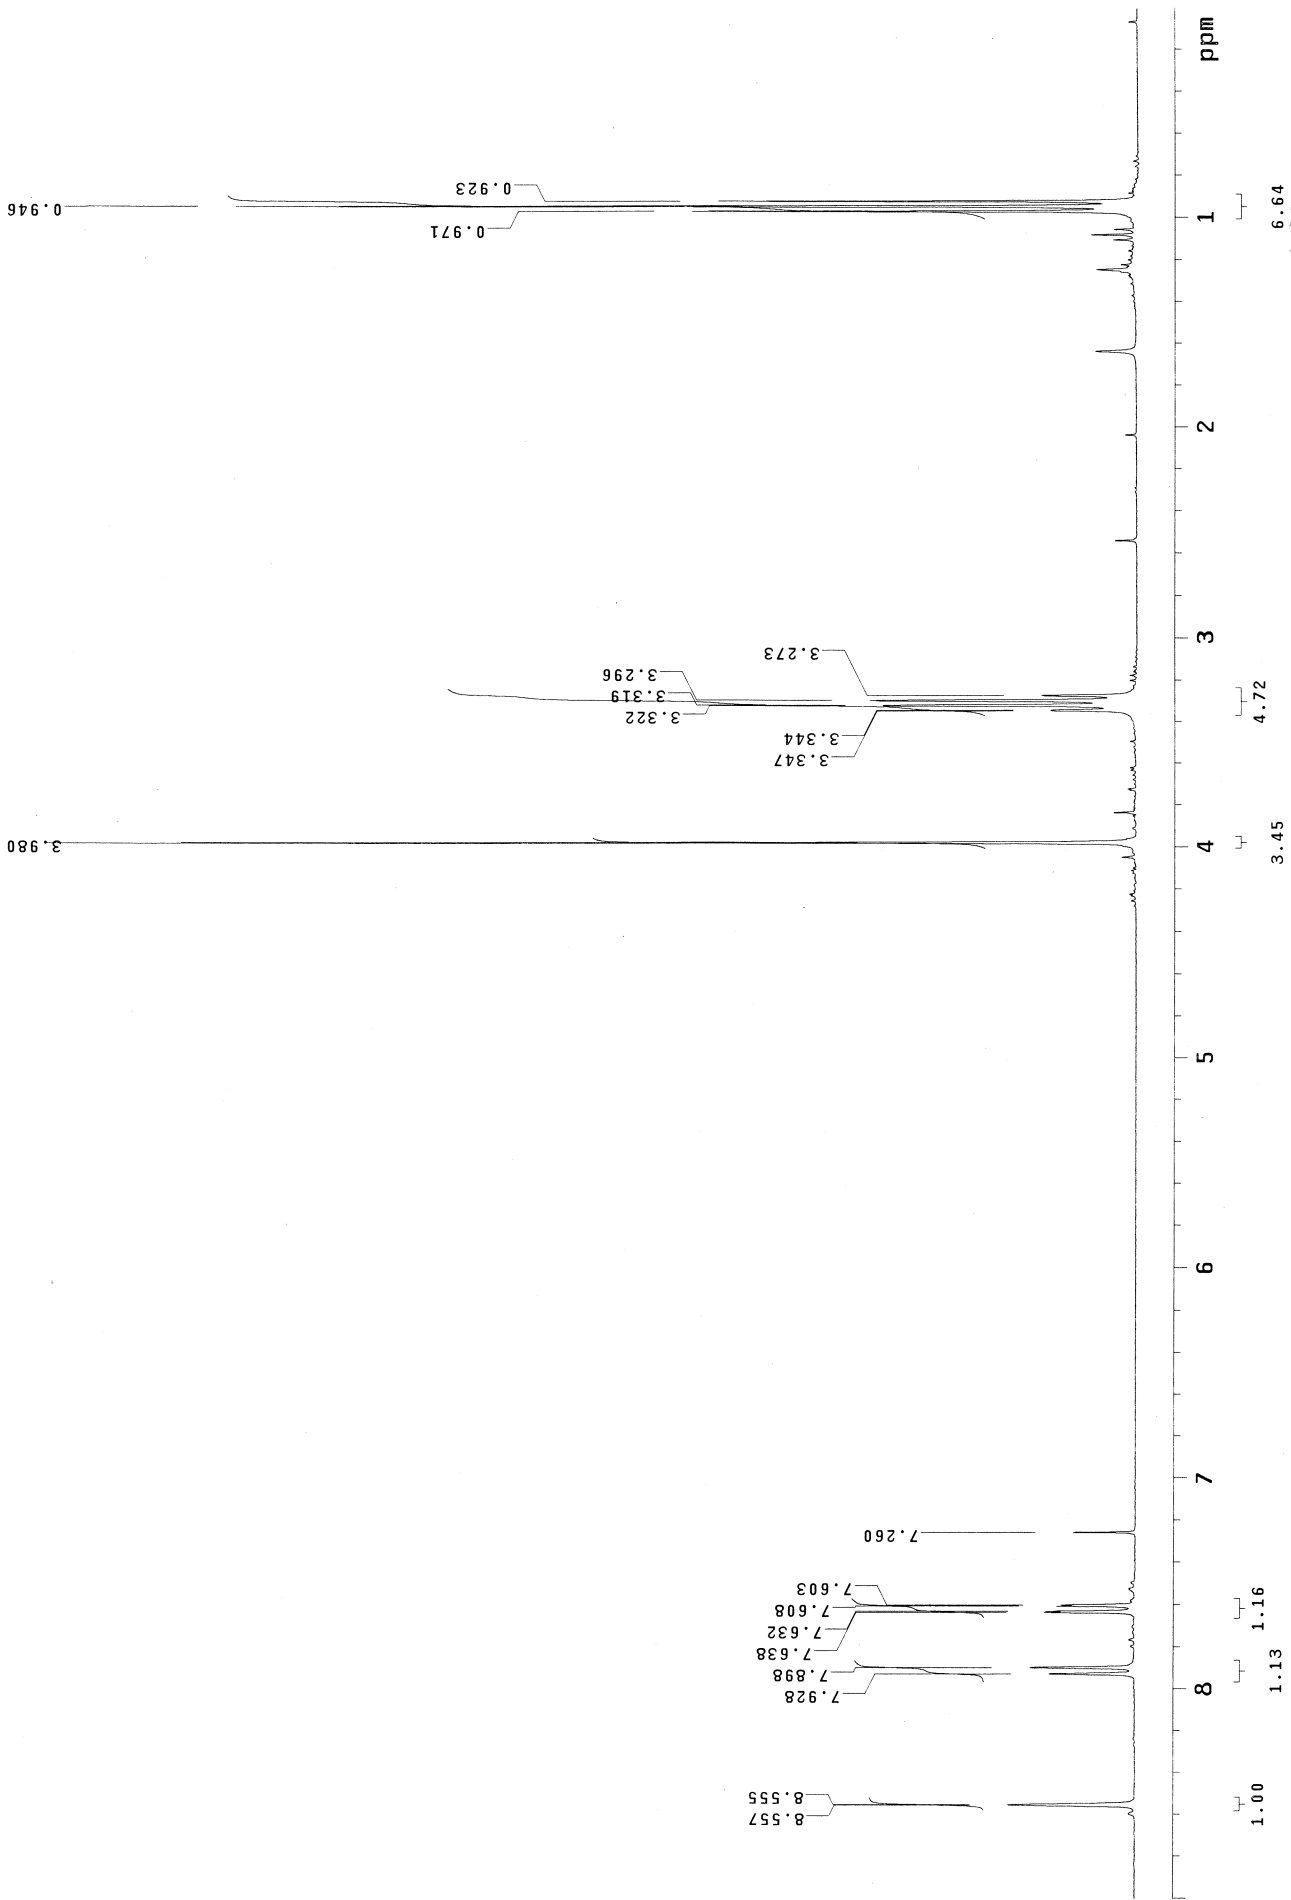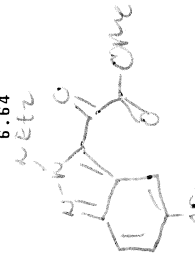



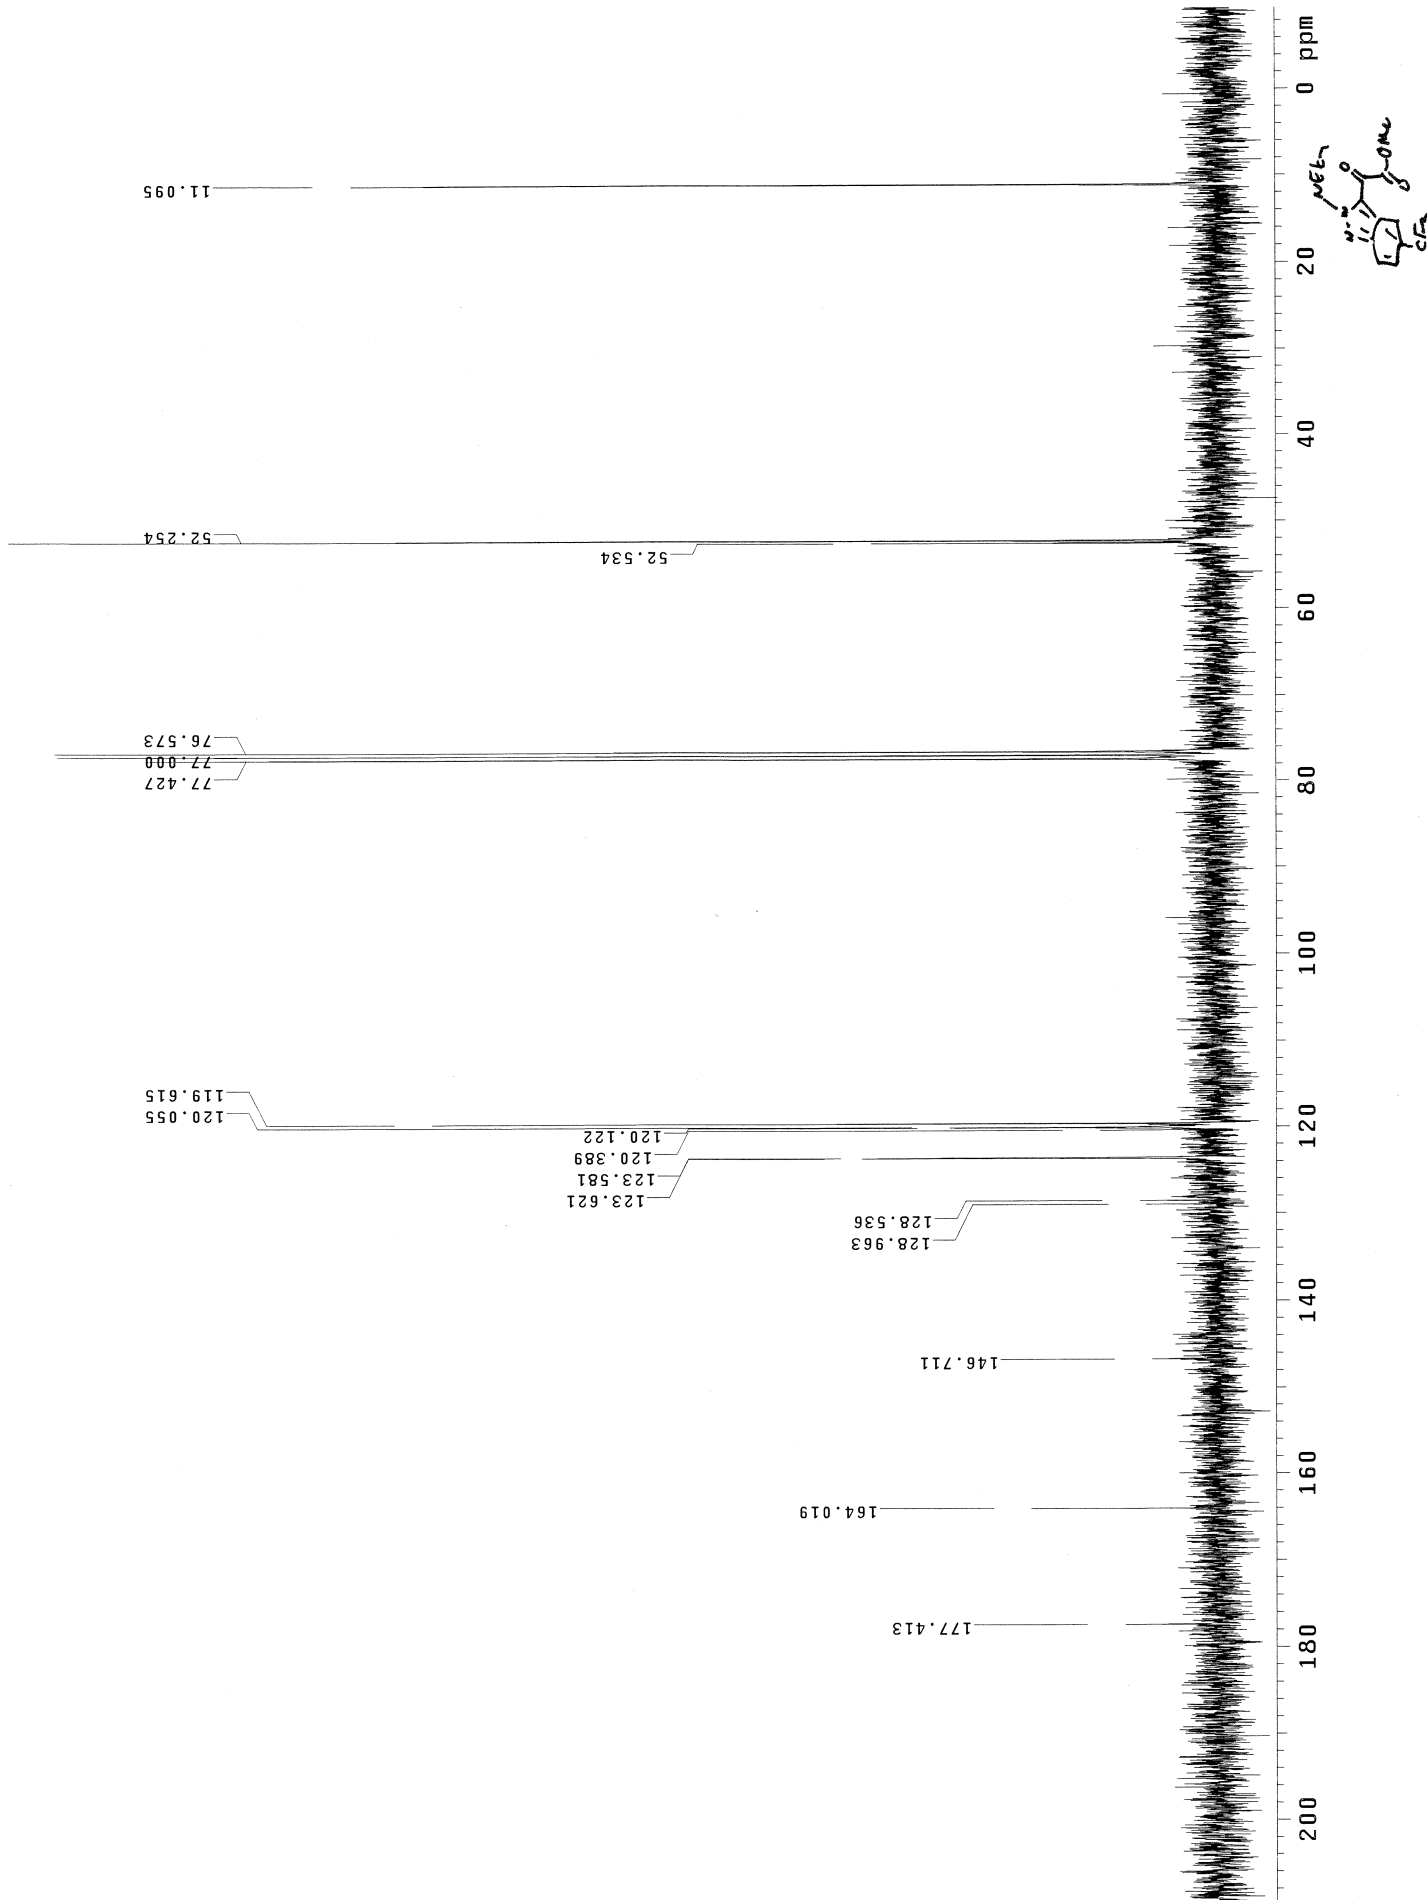

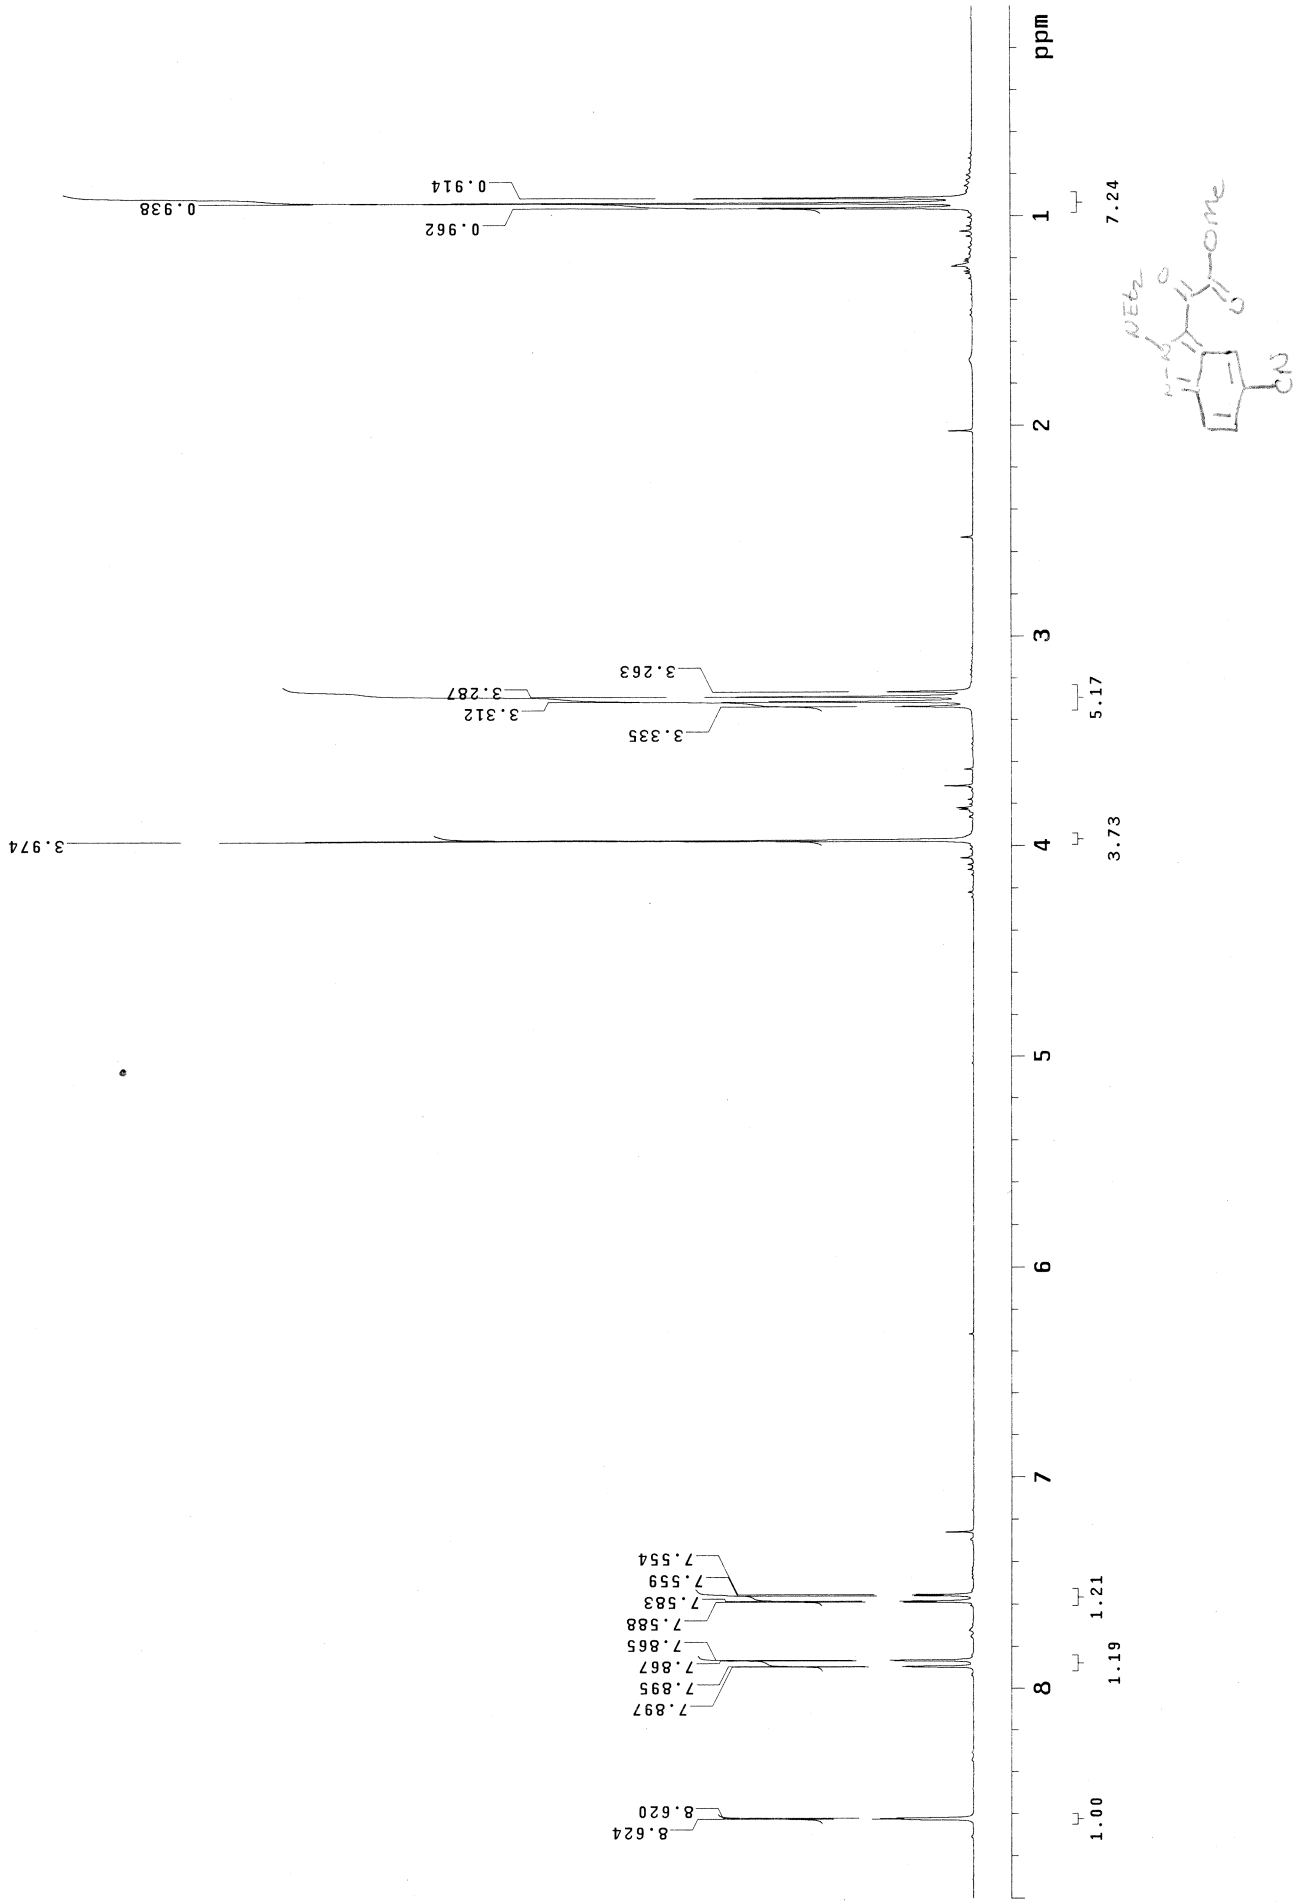

9c

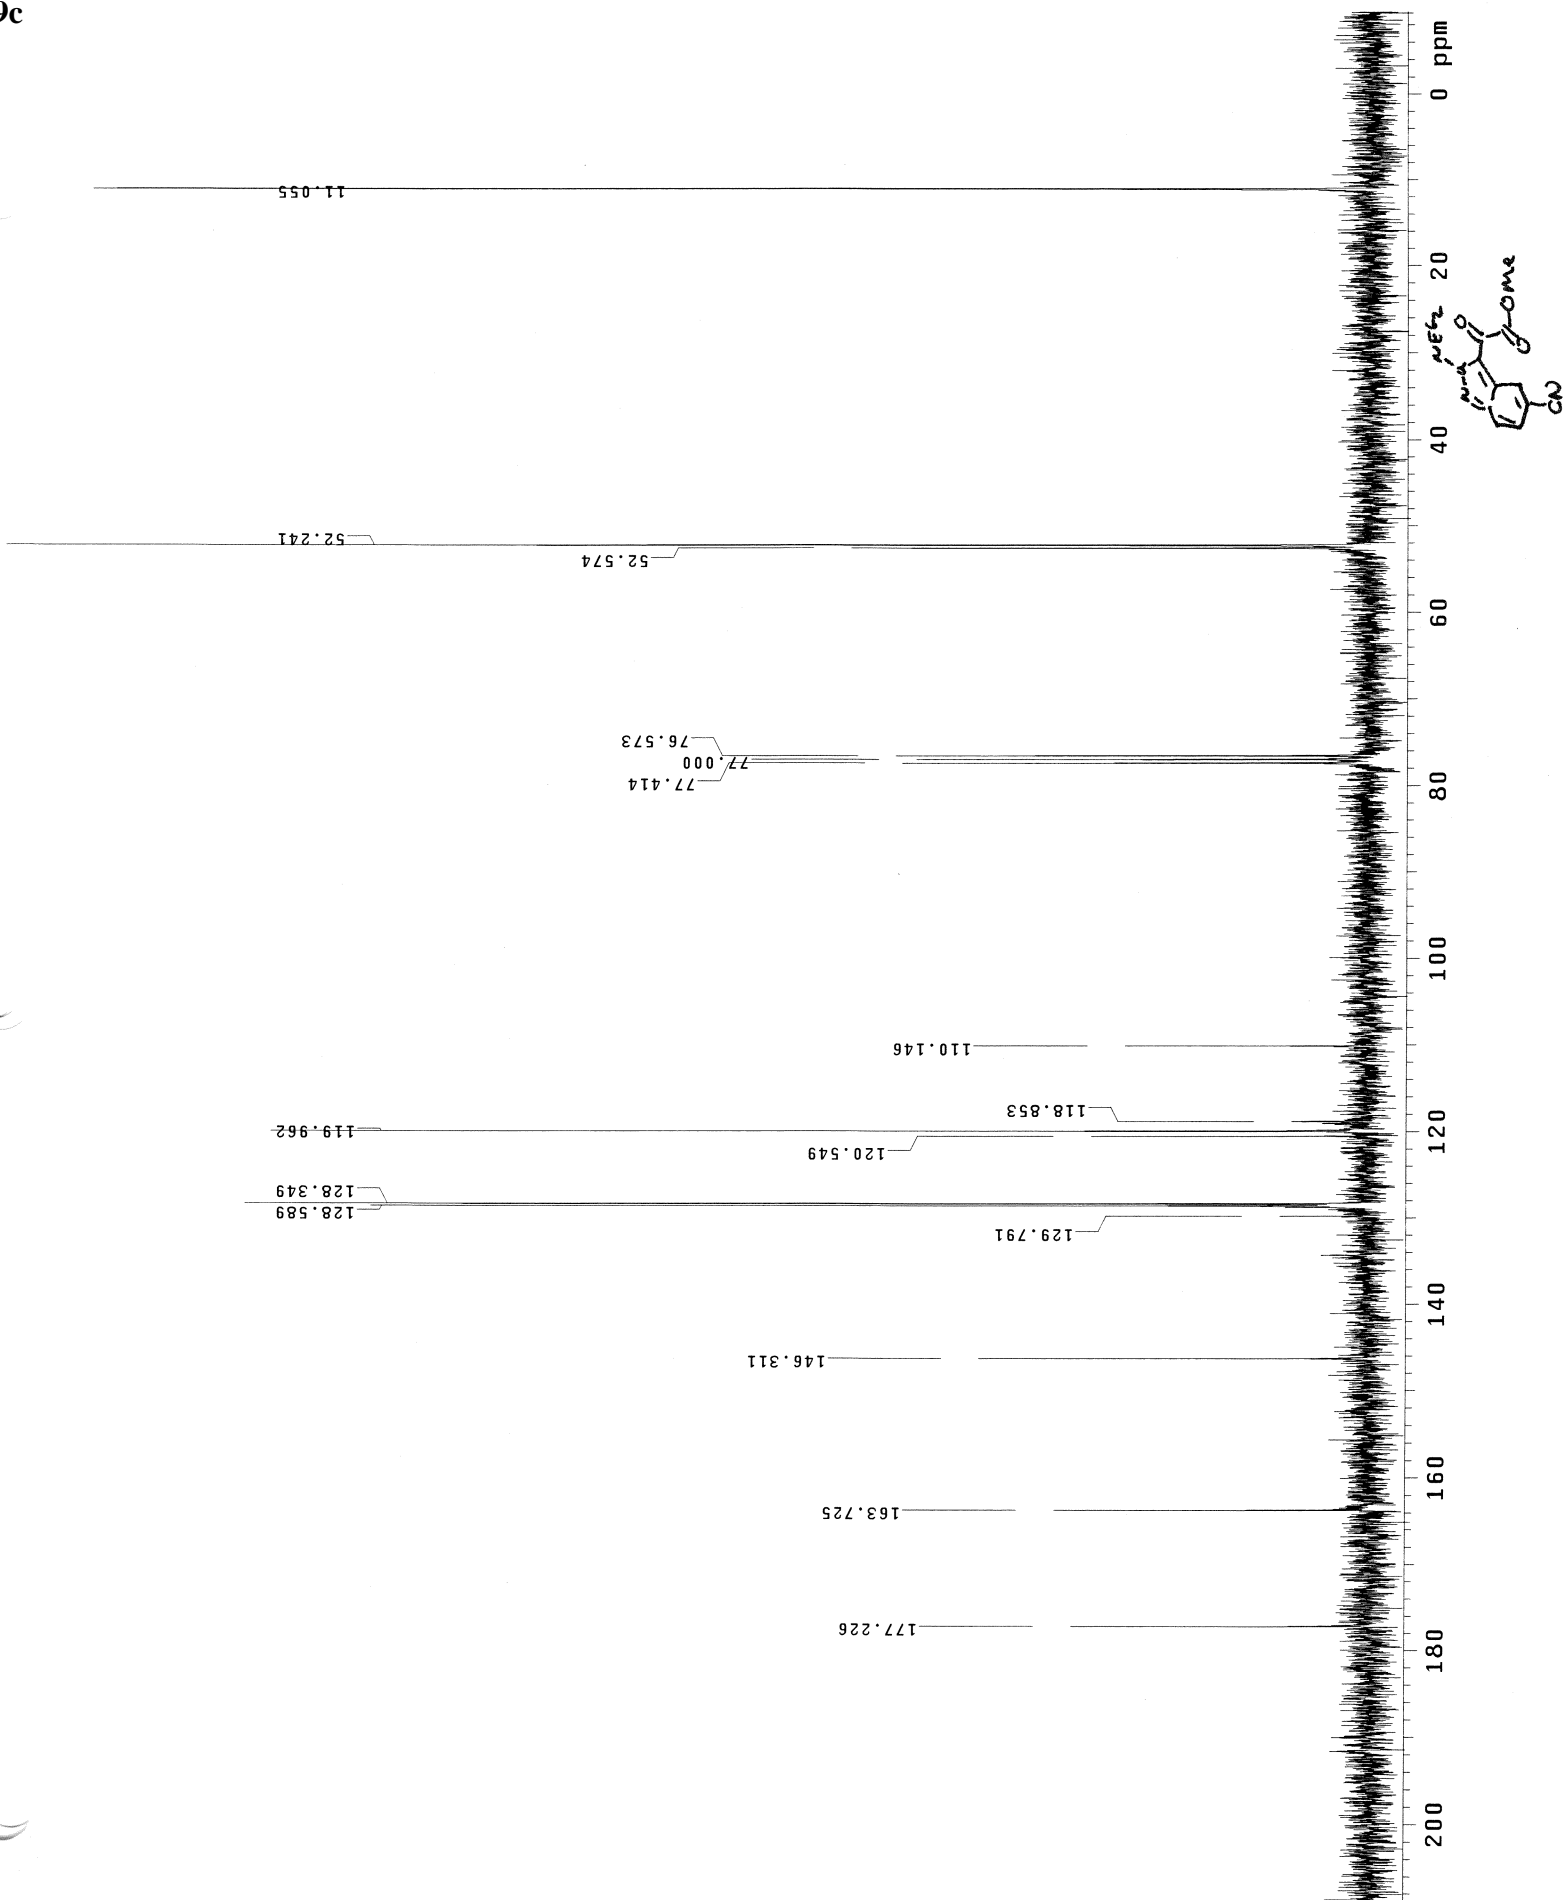

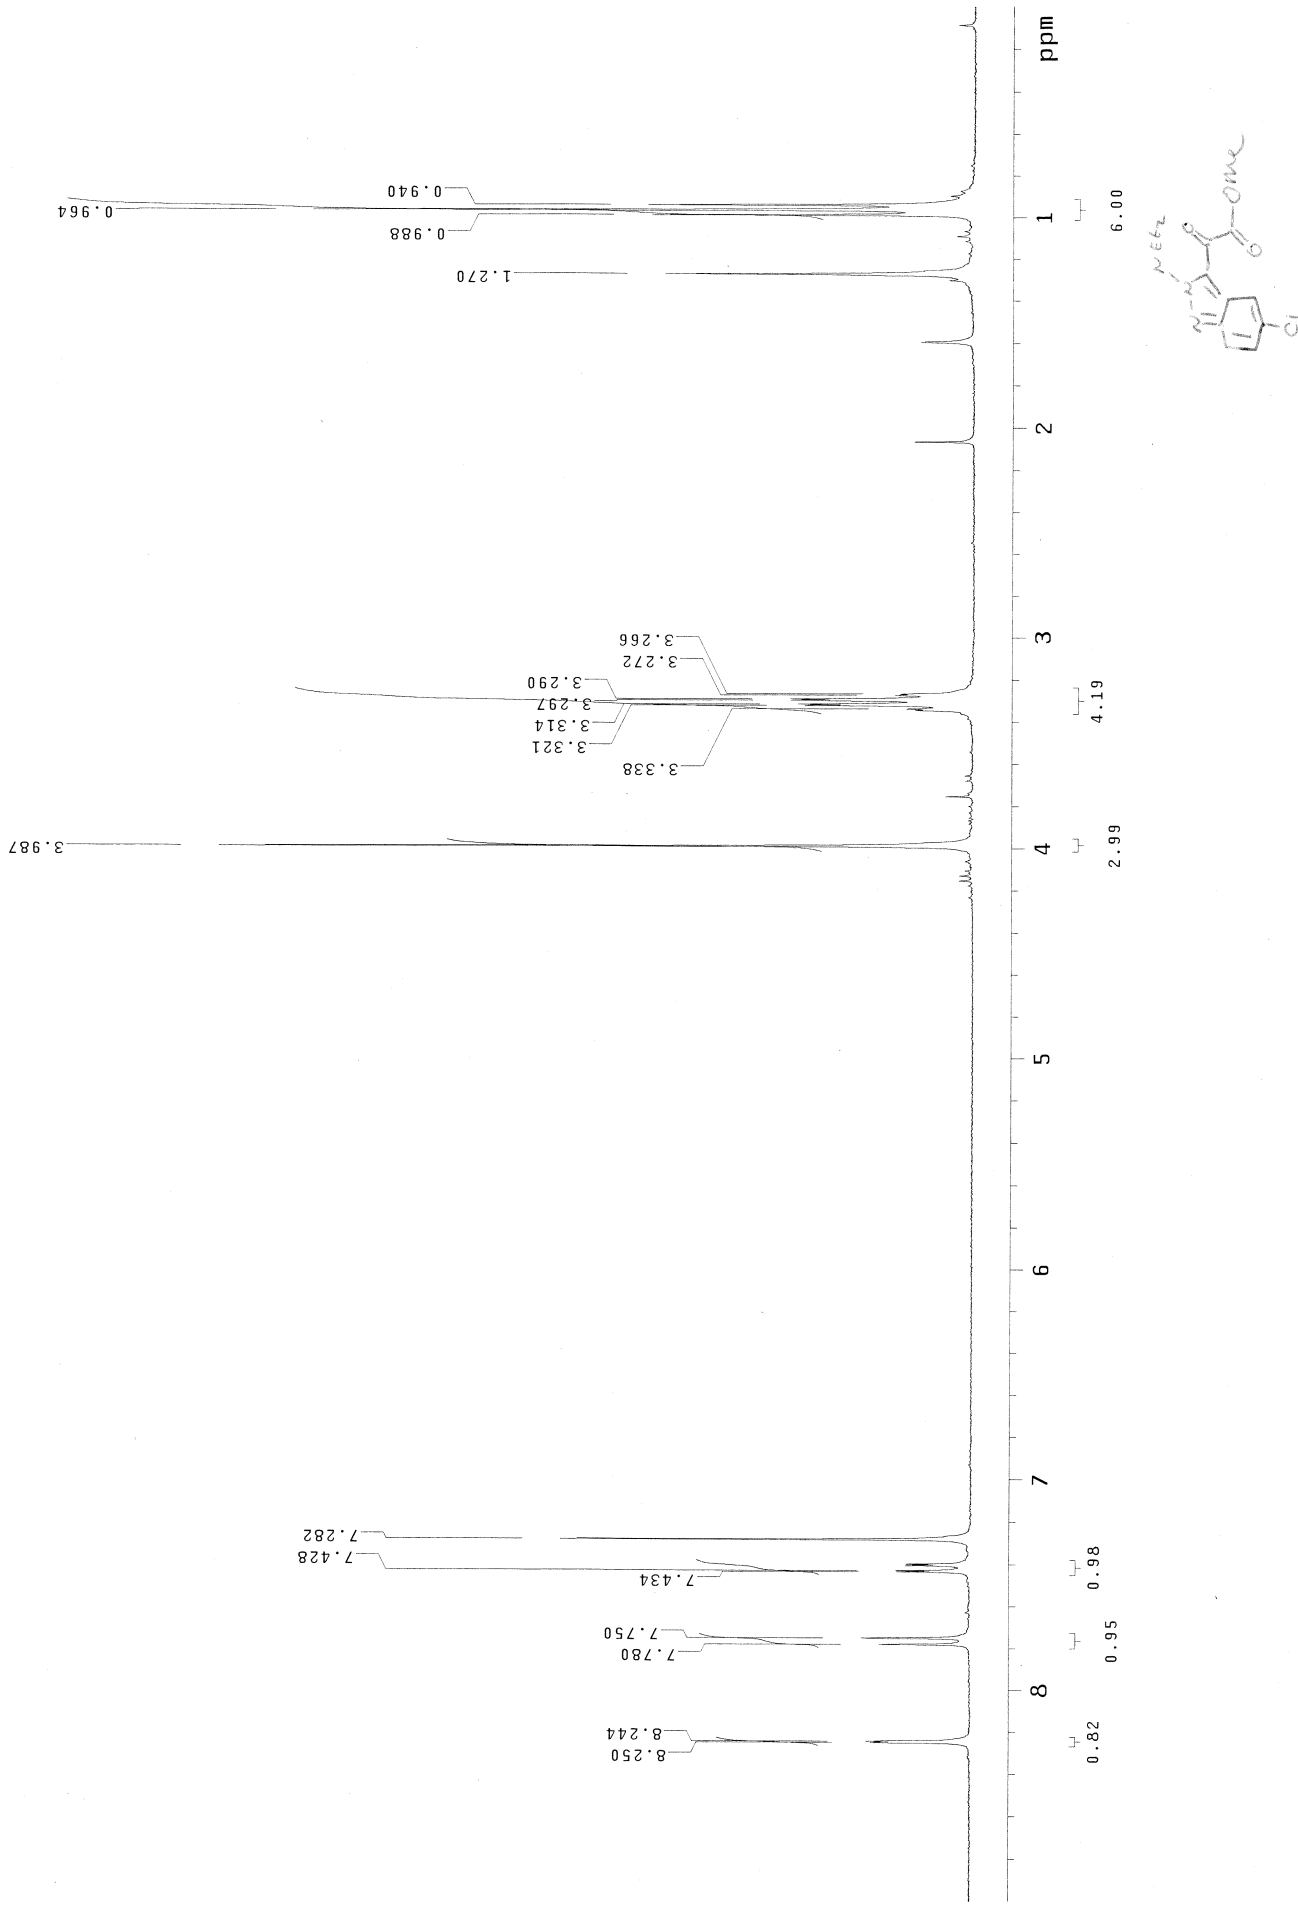

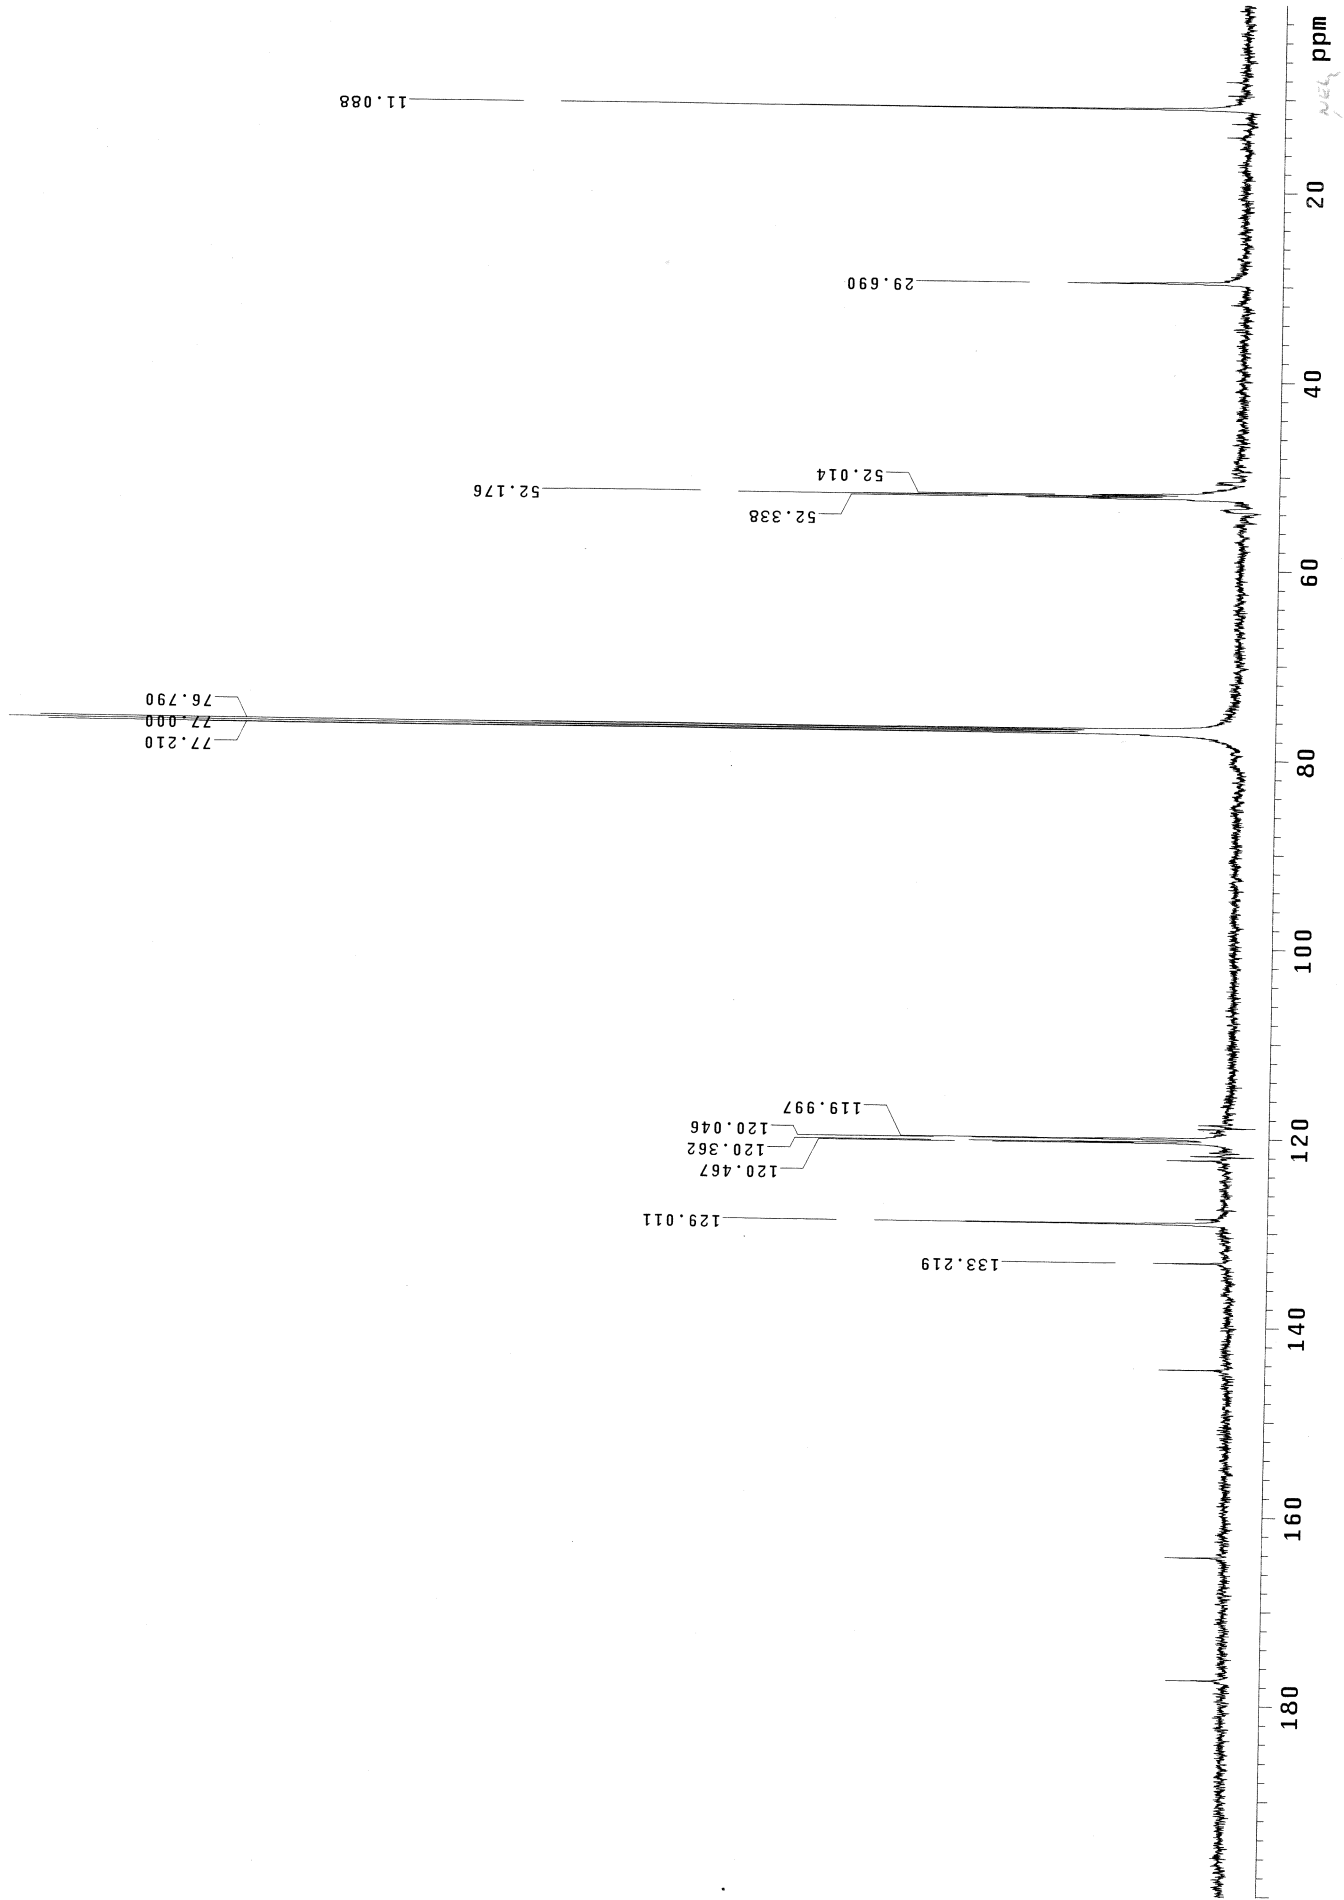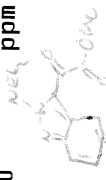

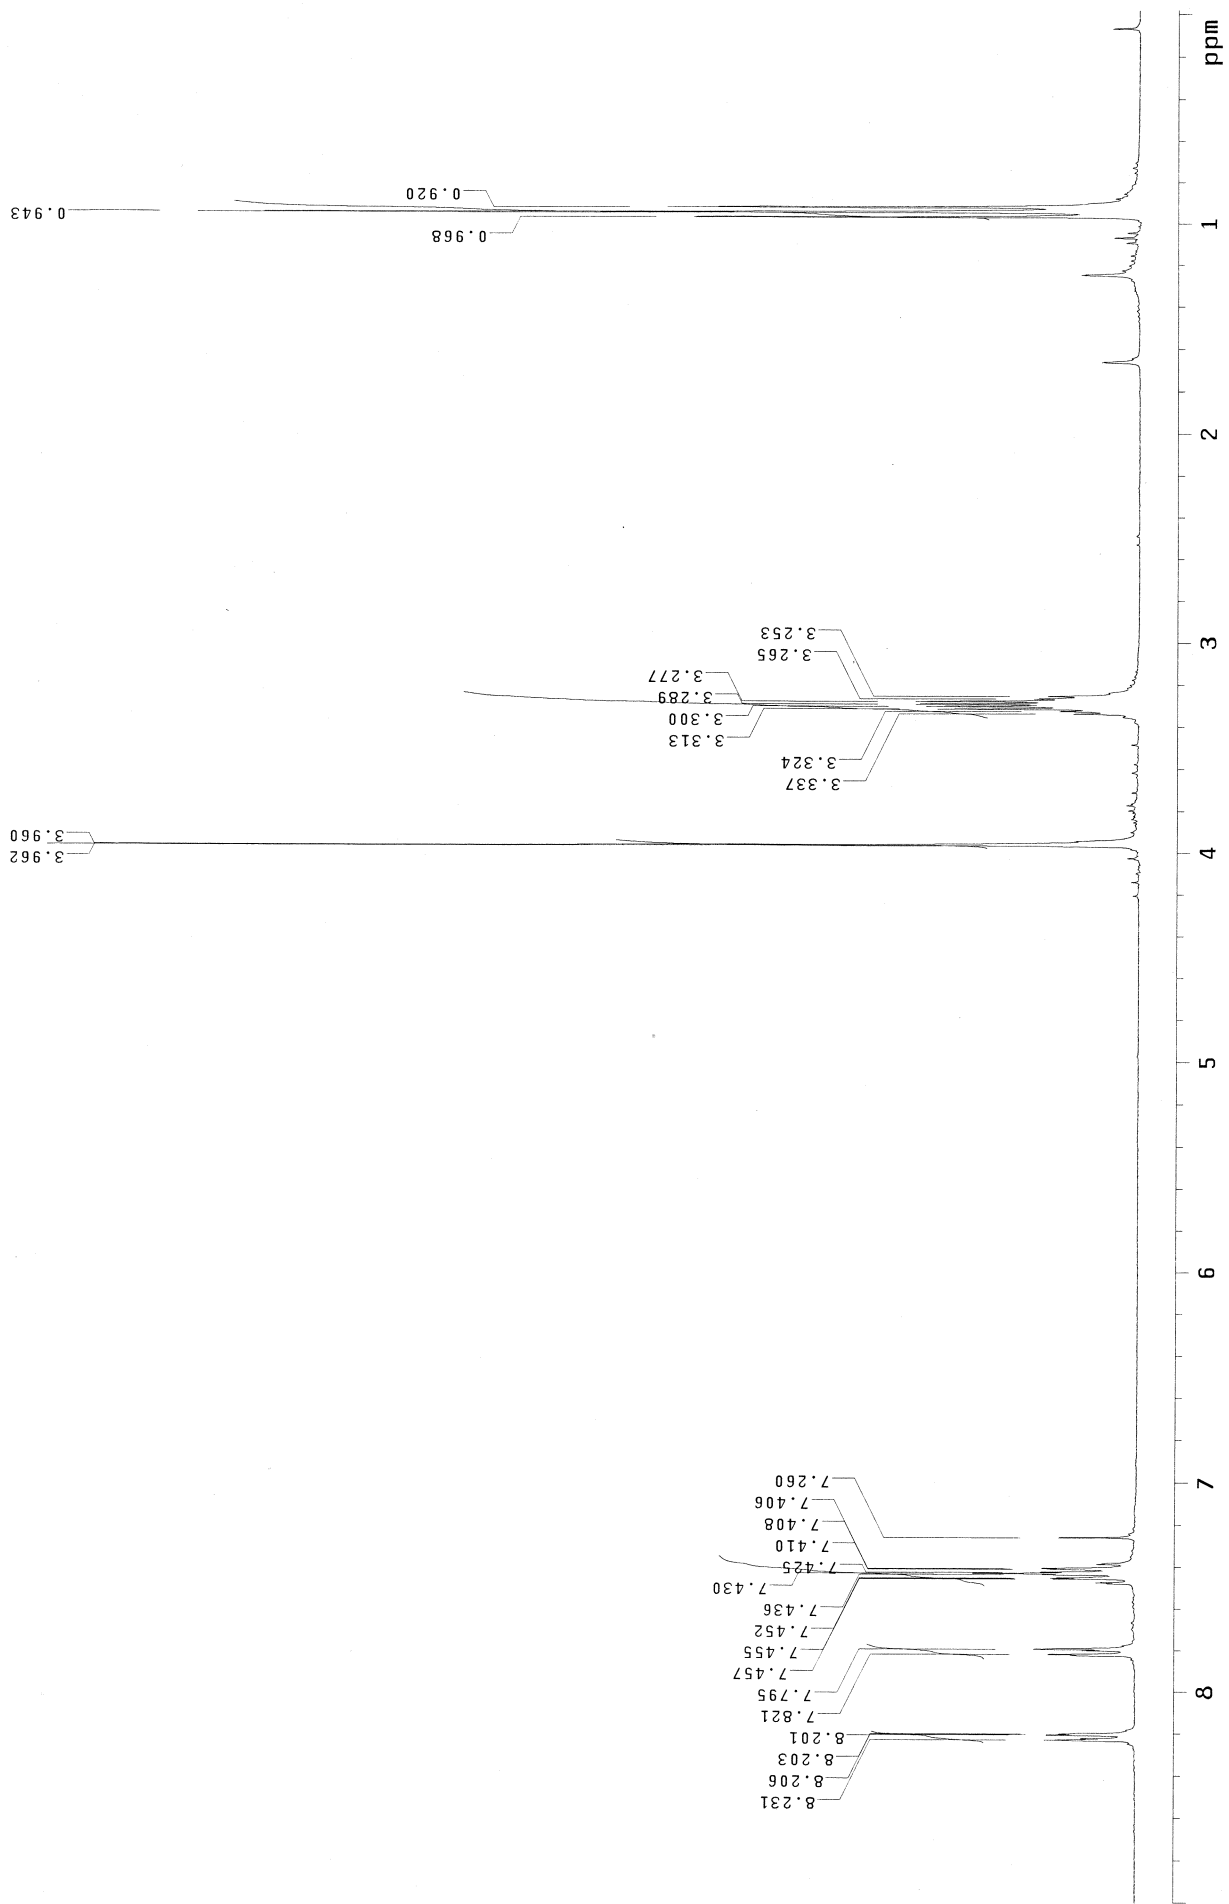

9e

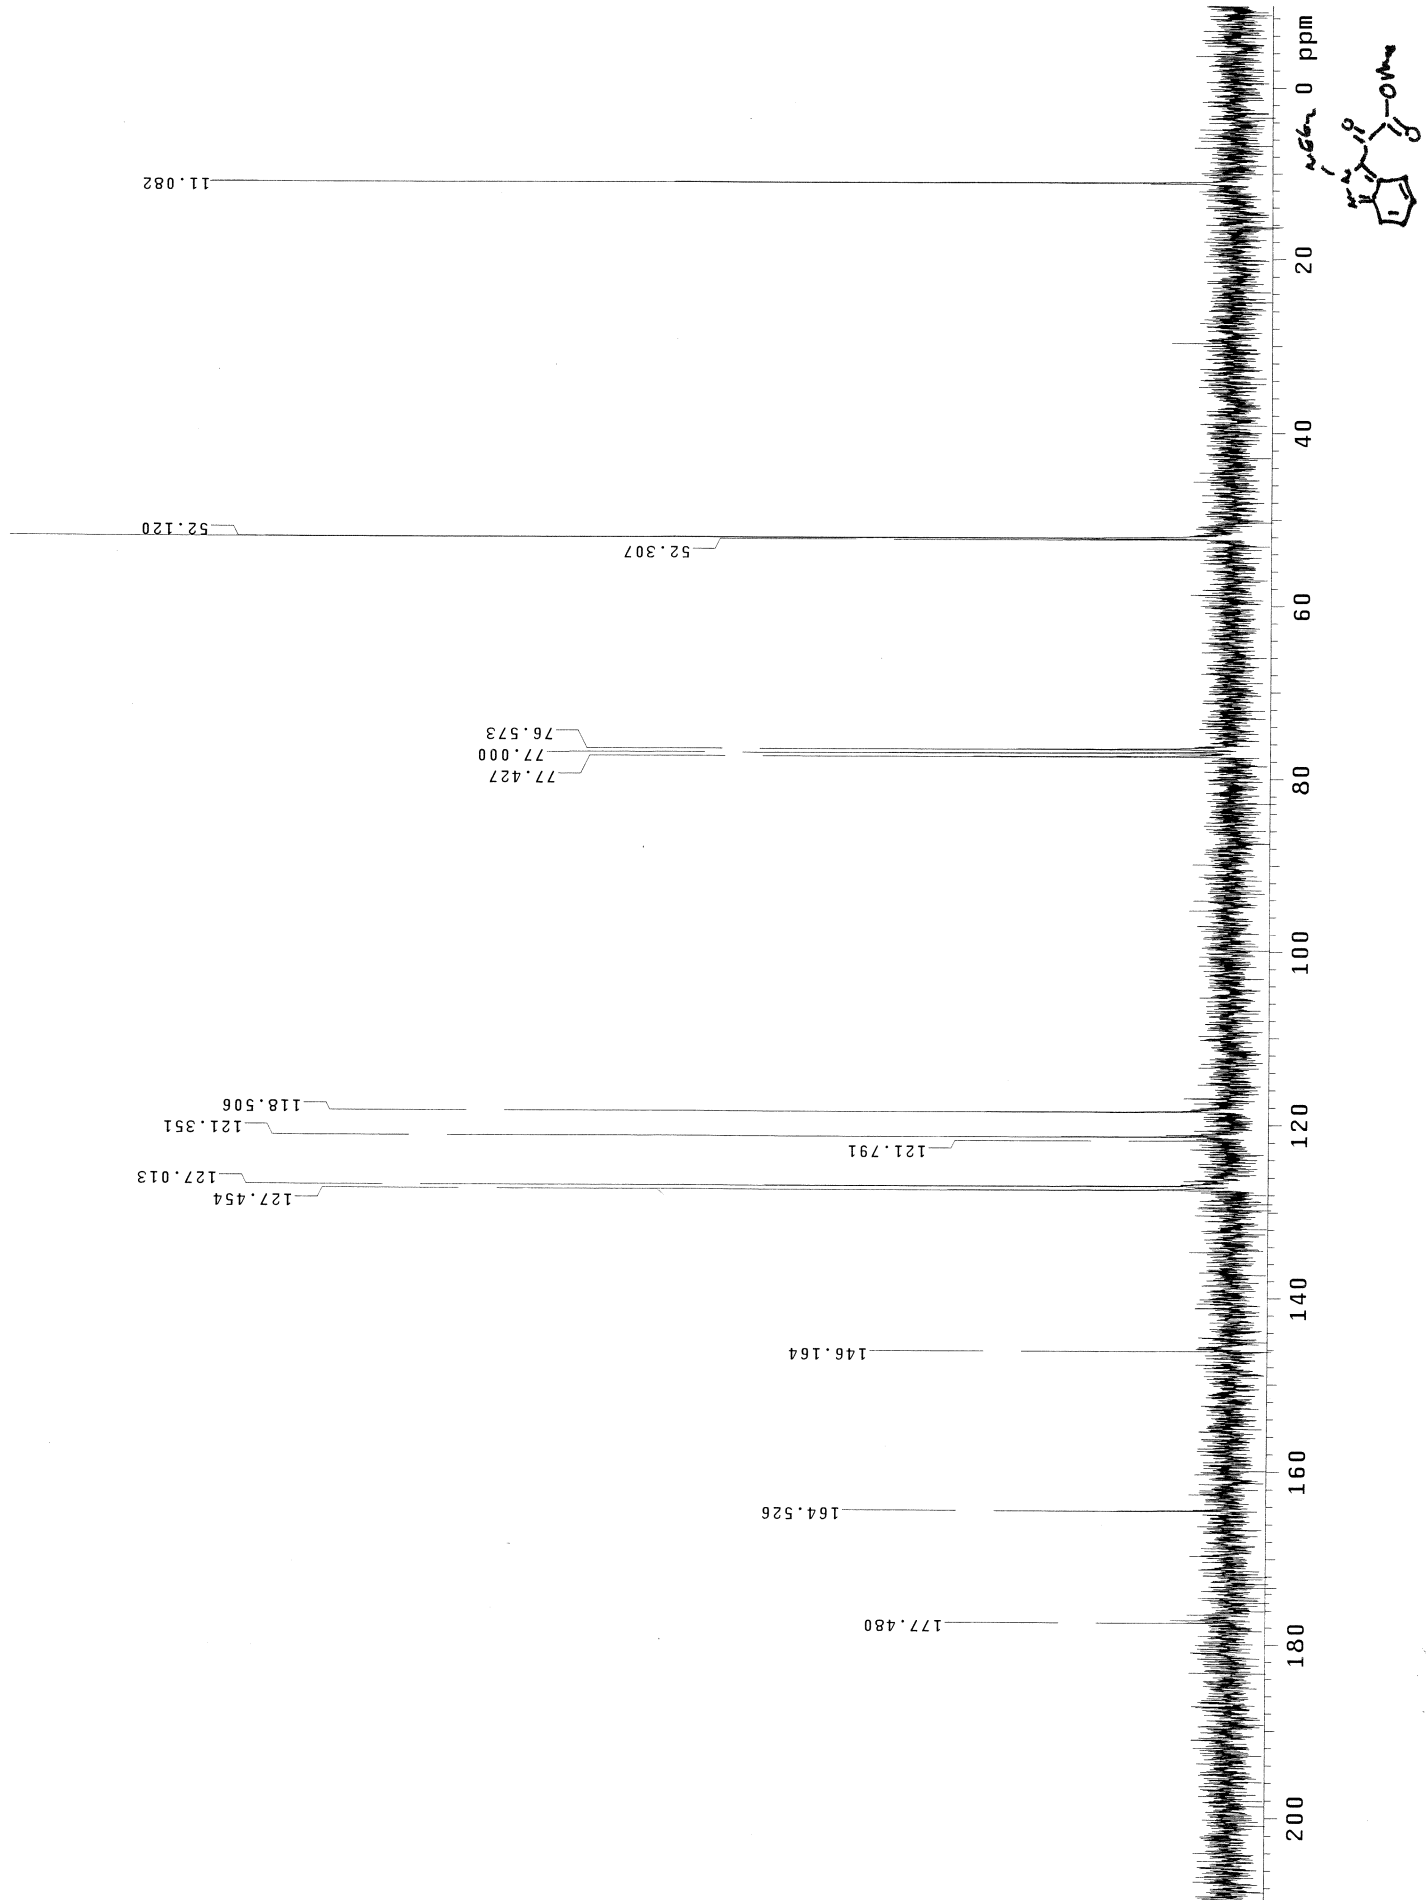

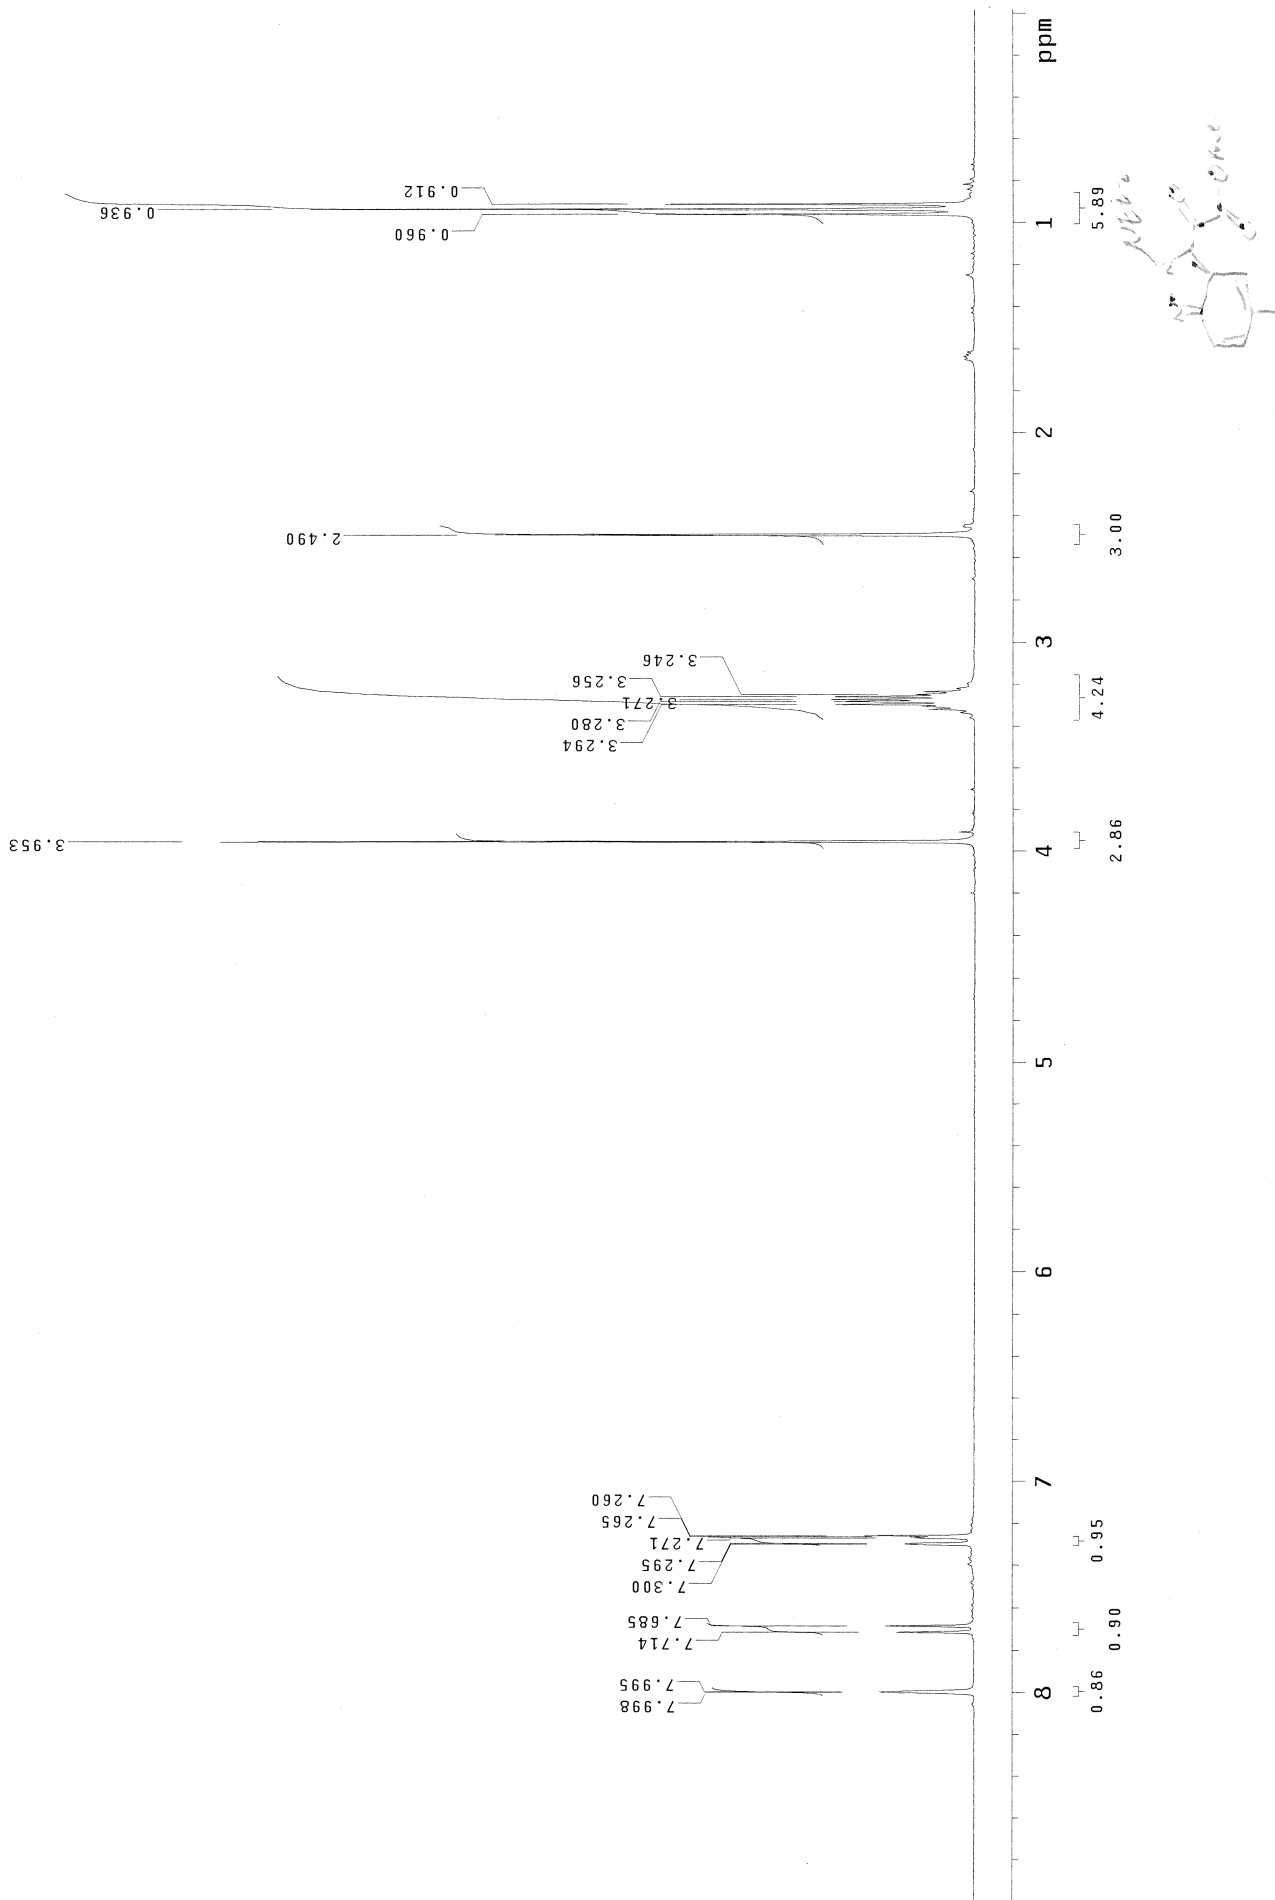



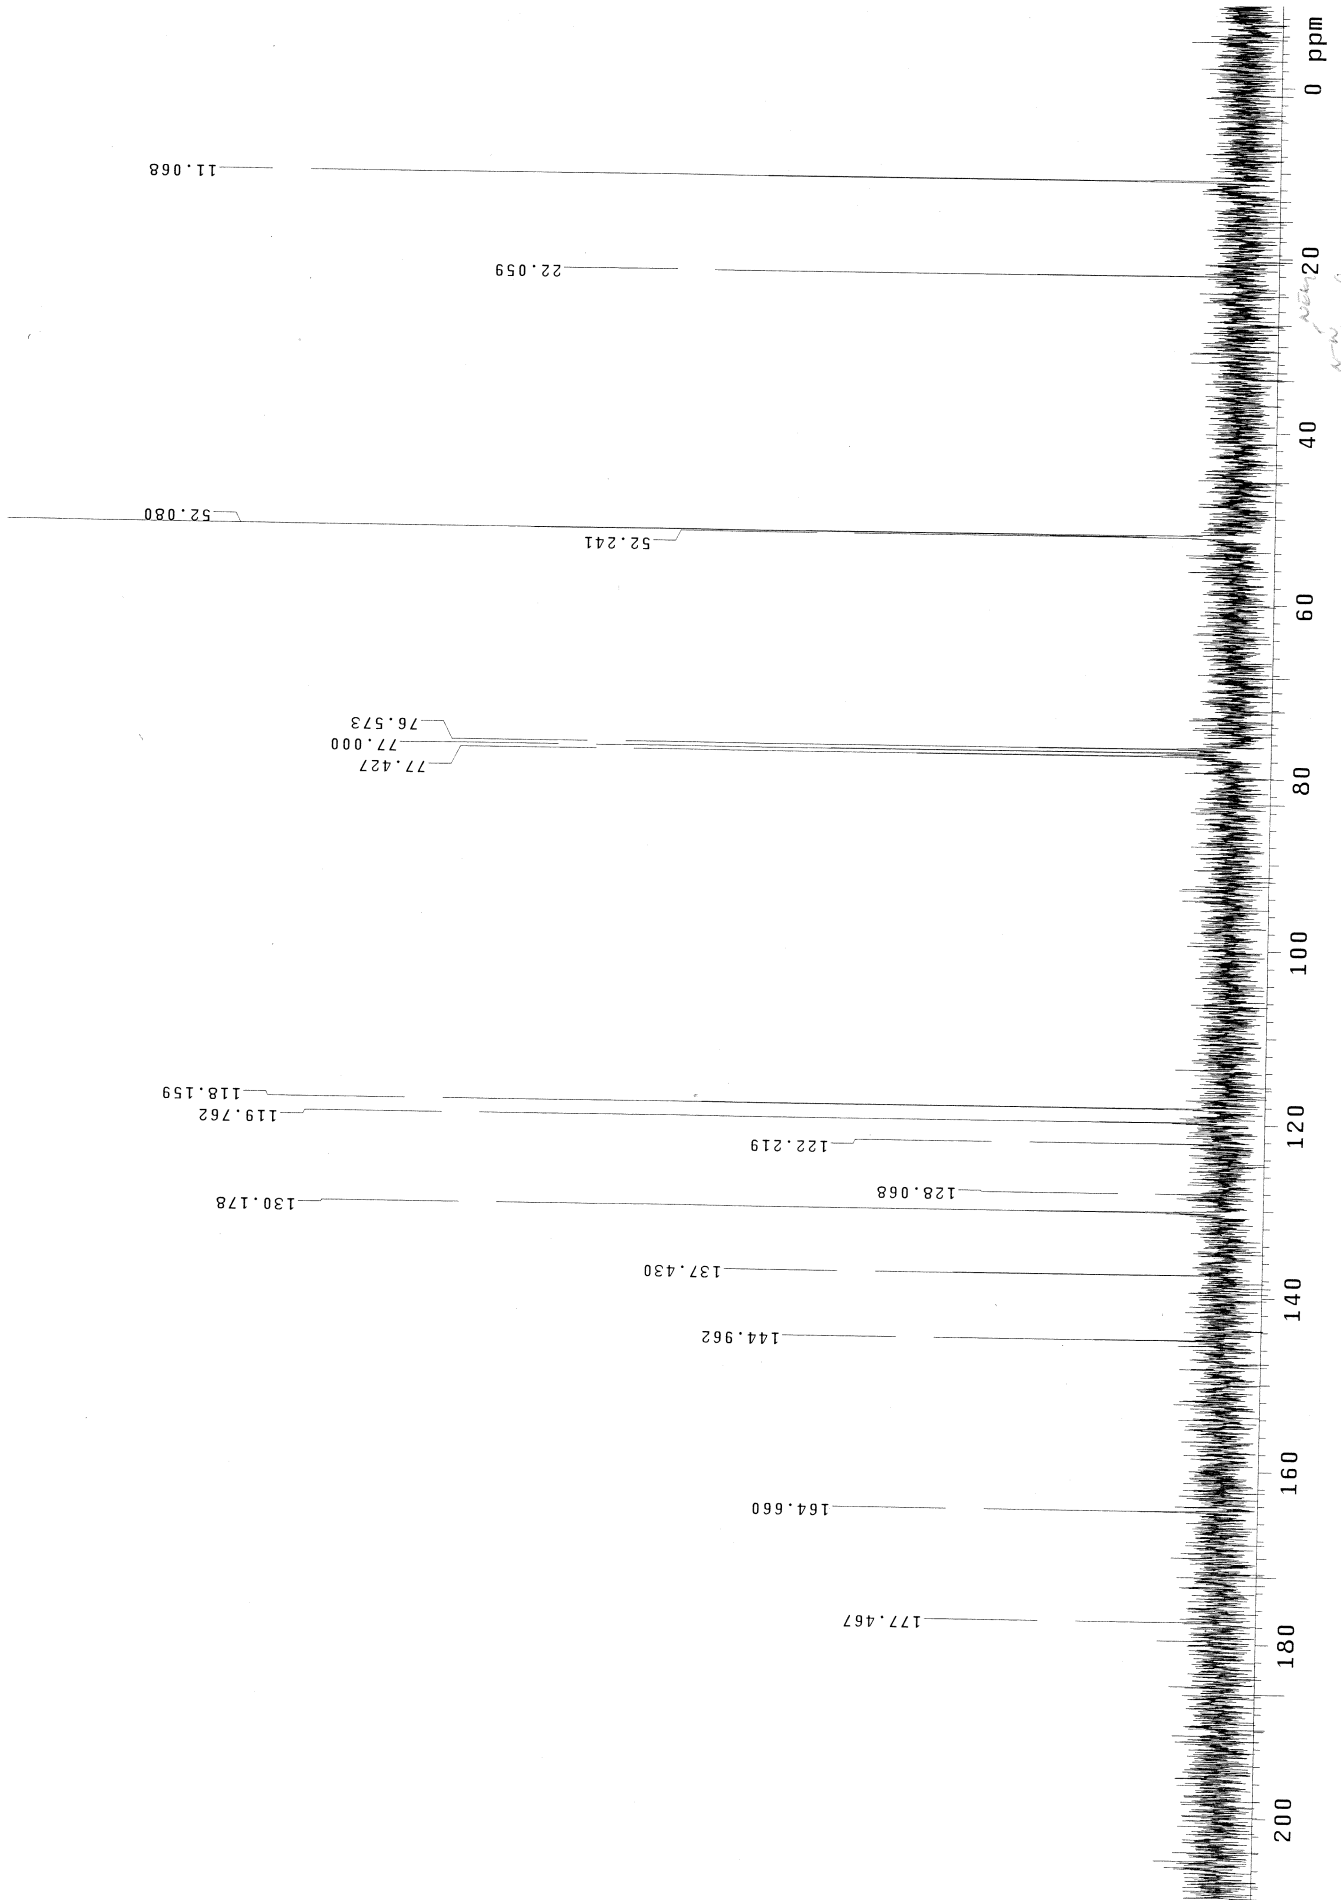

9g

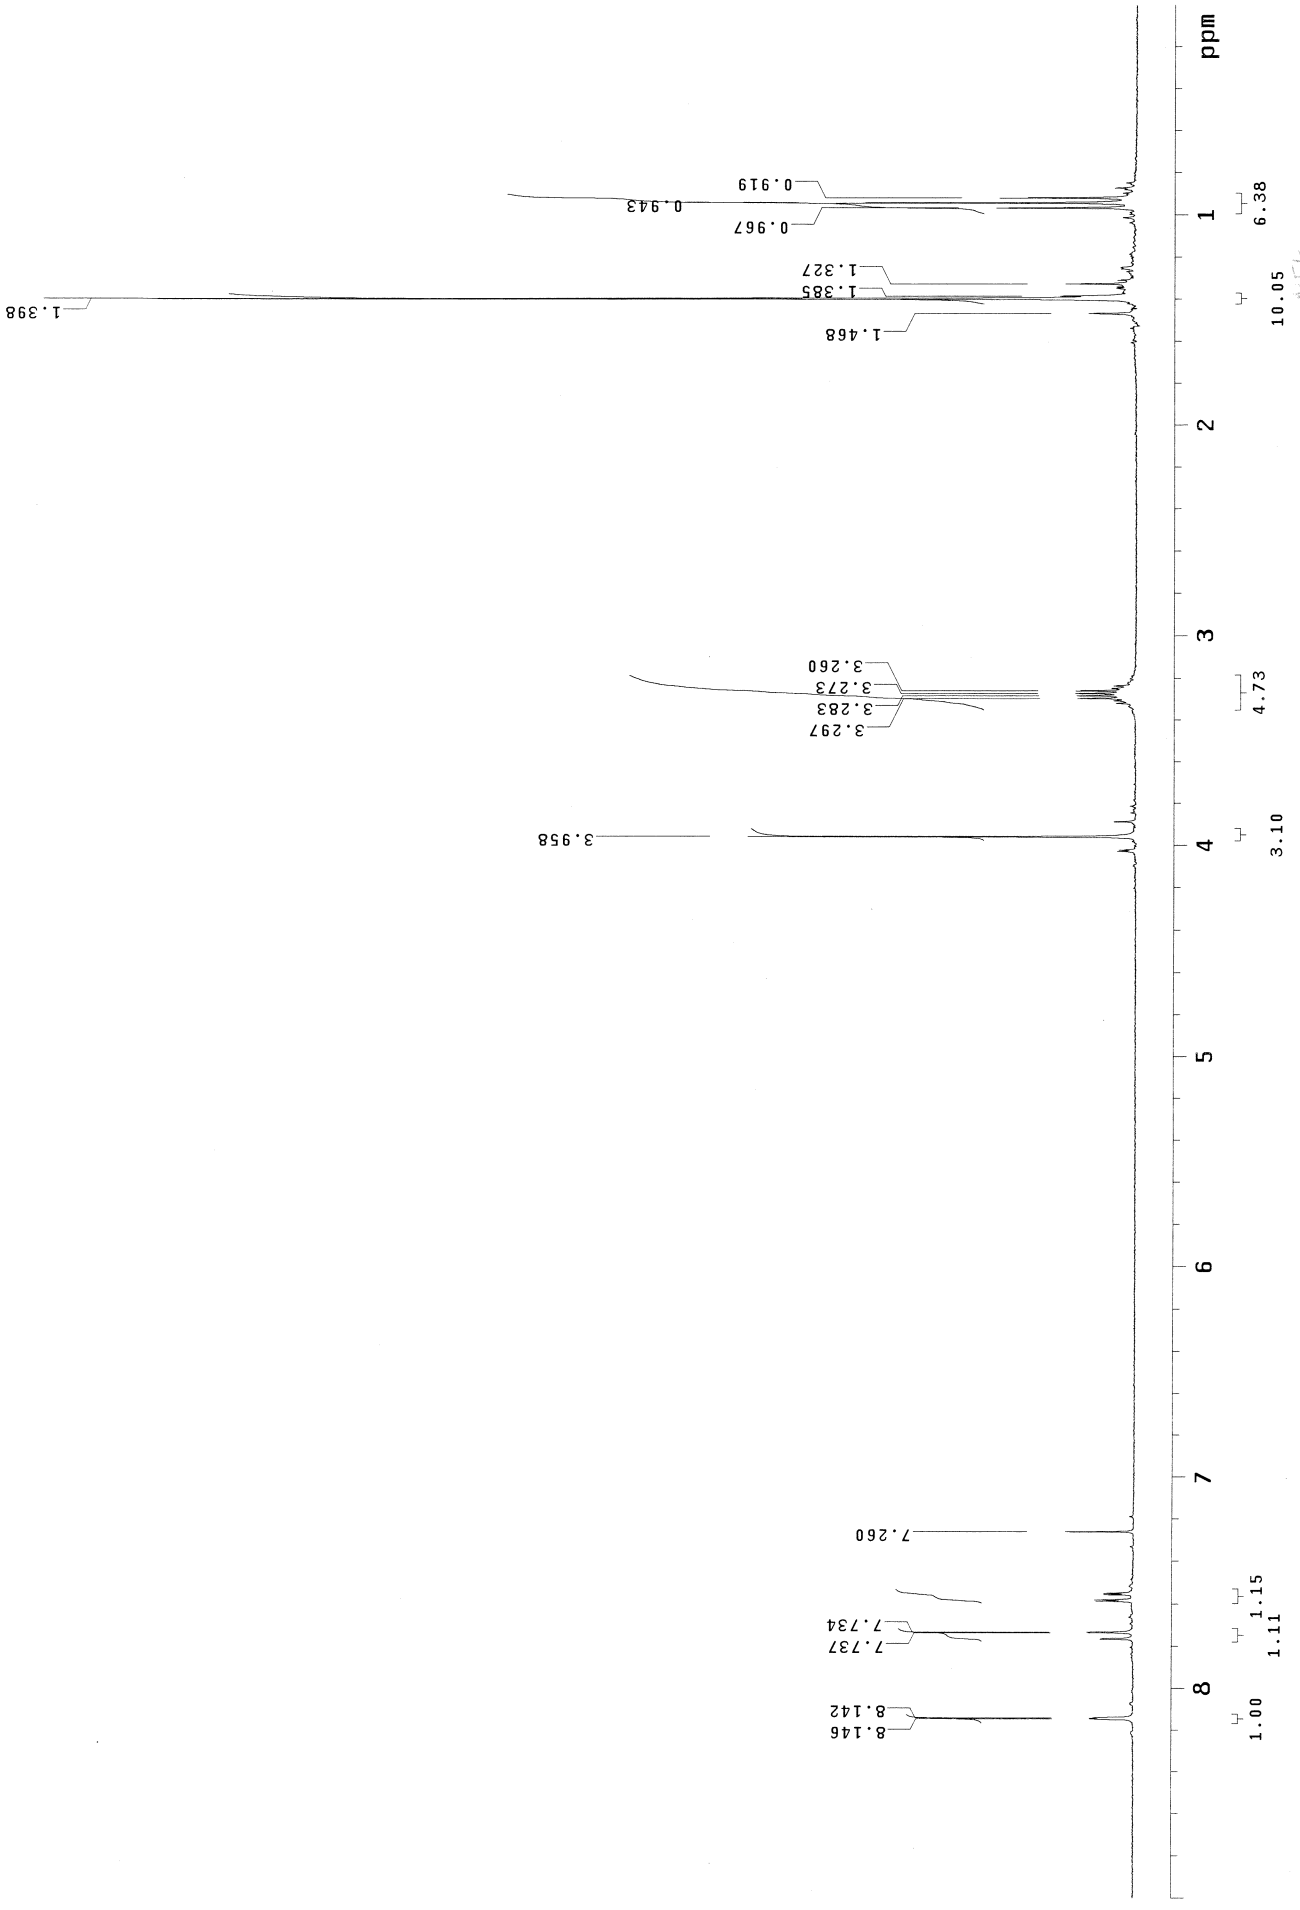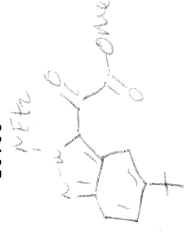

9g

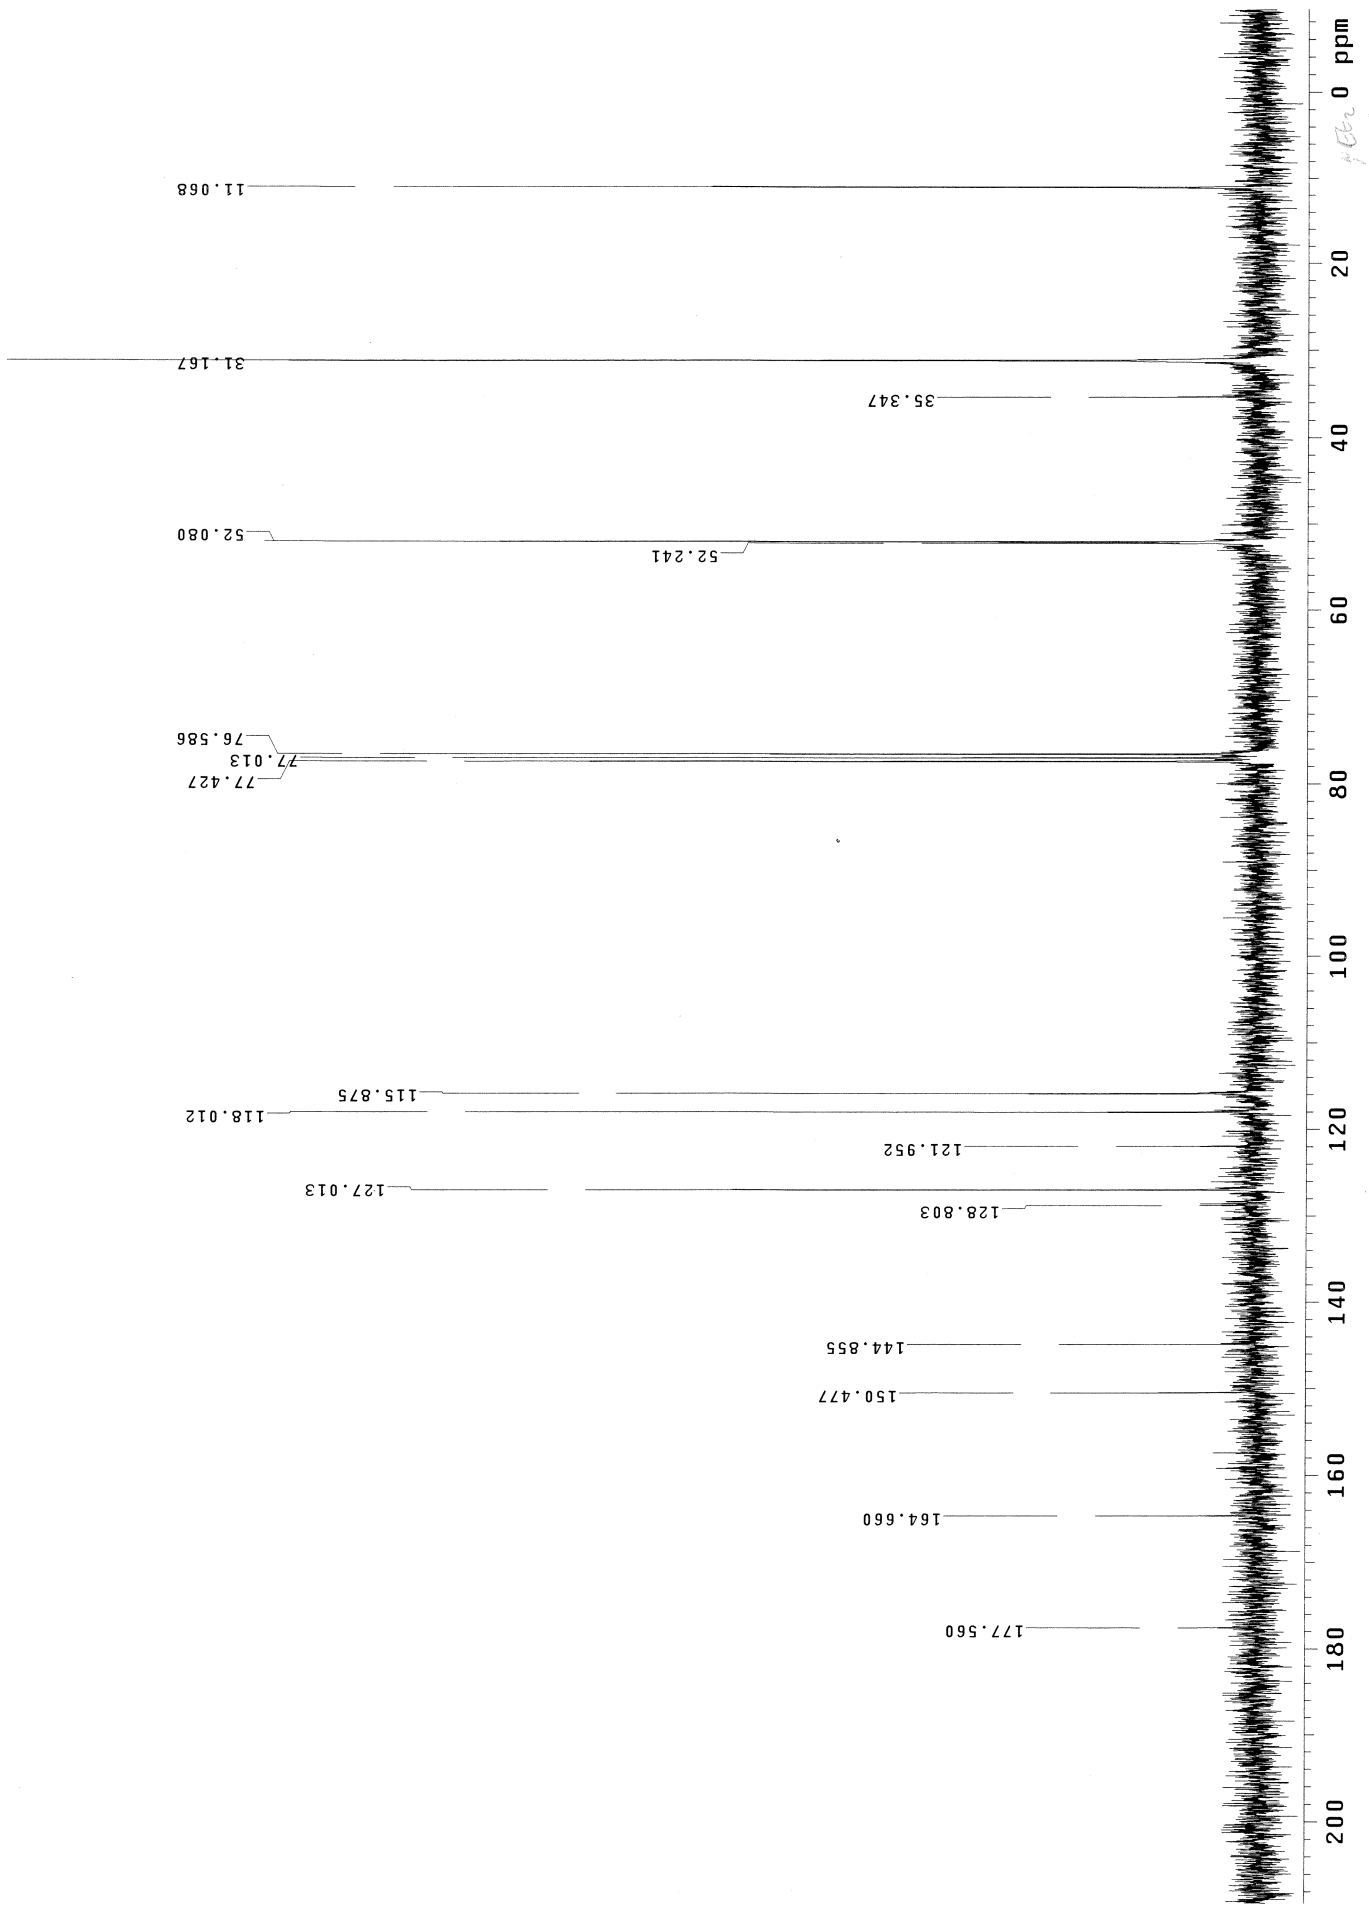

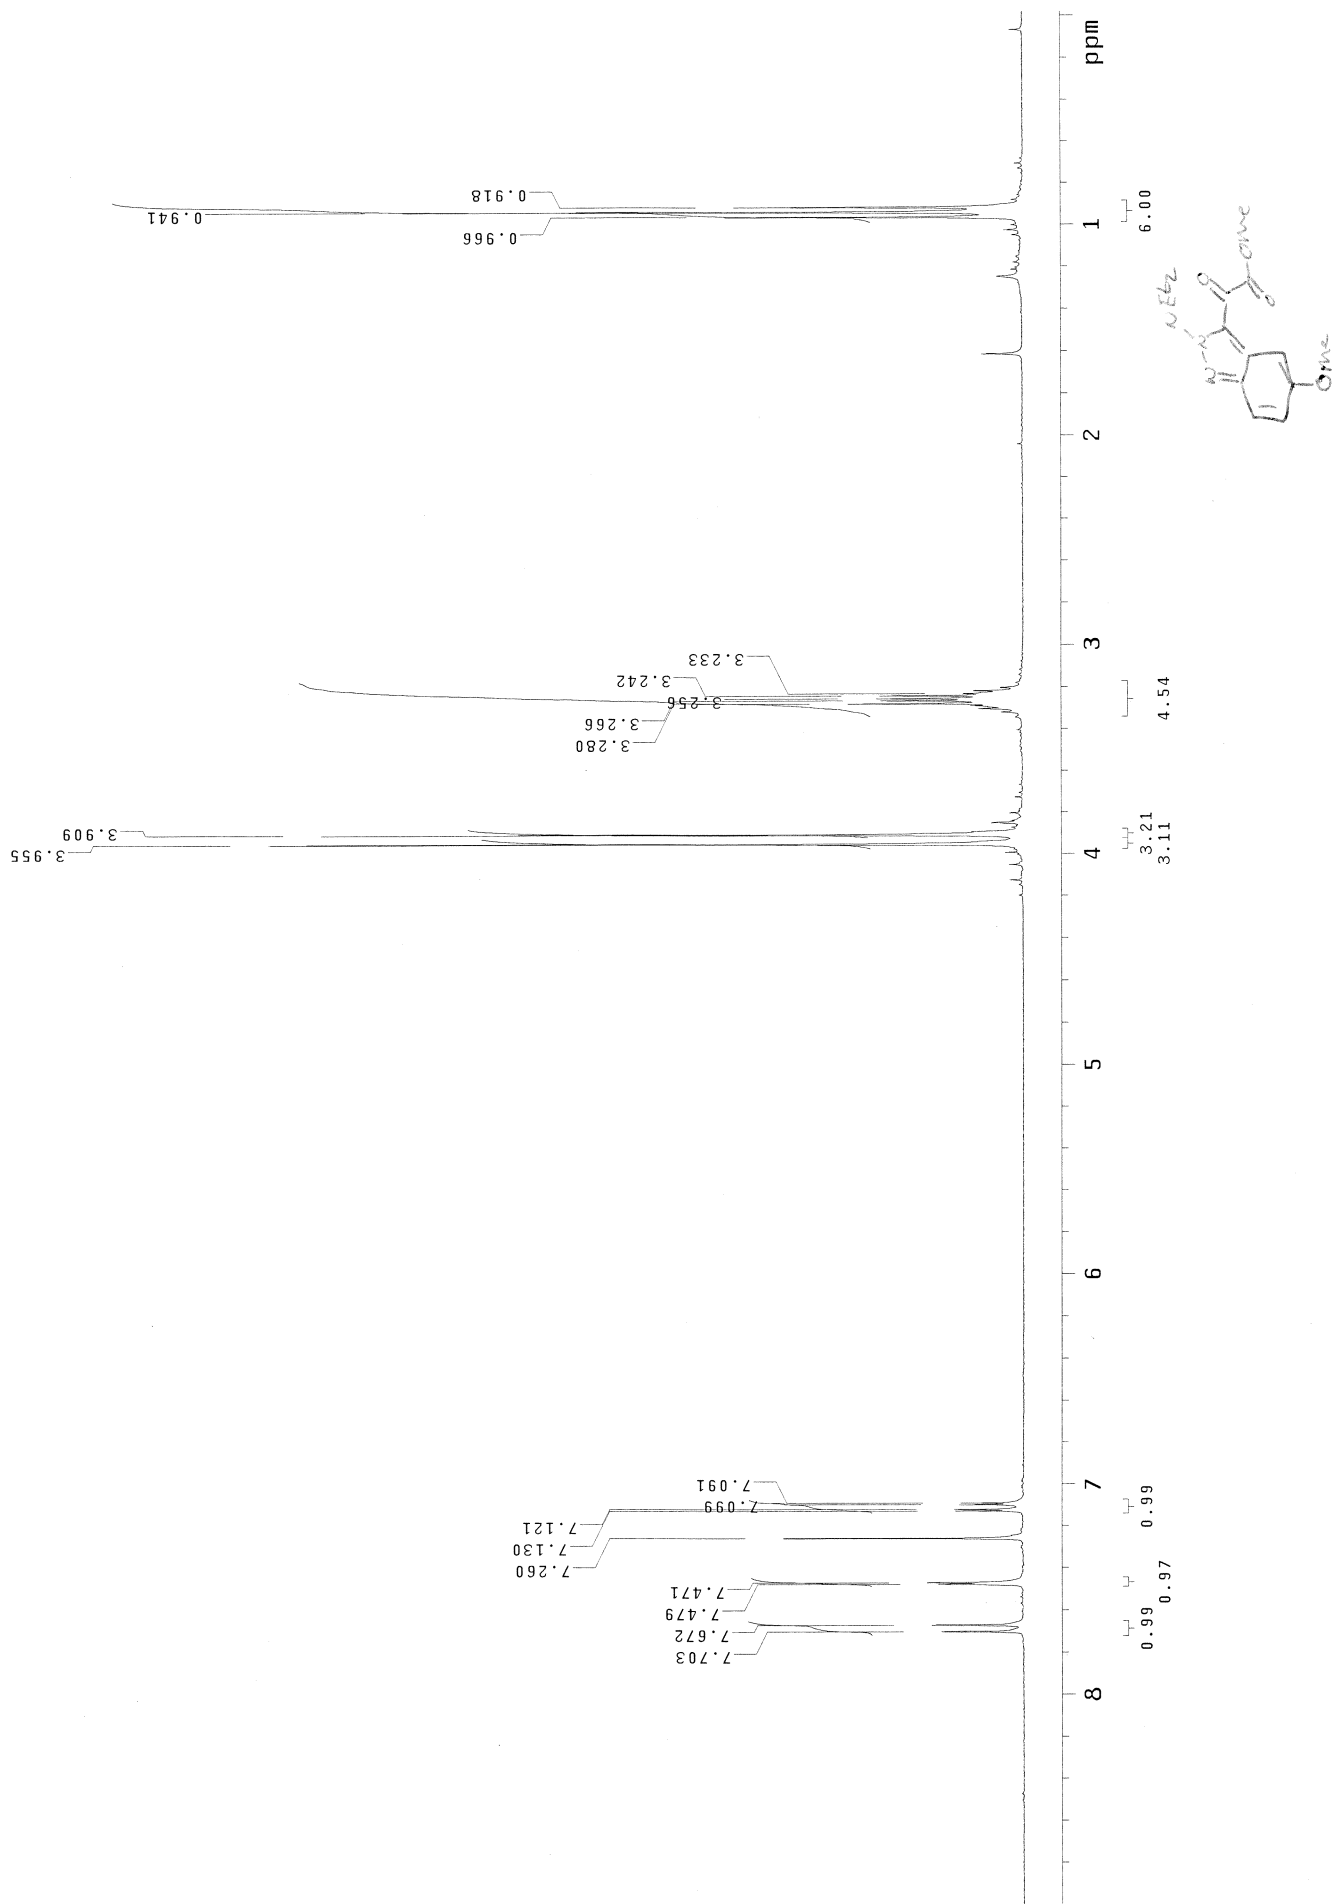

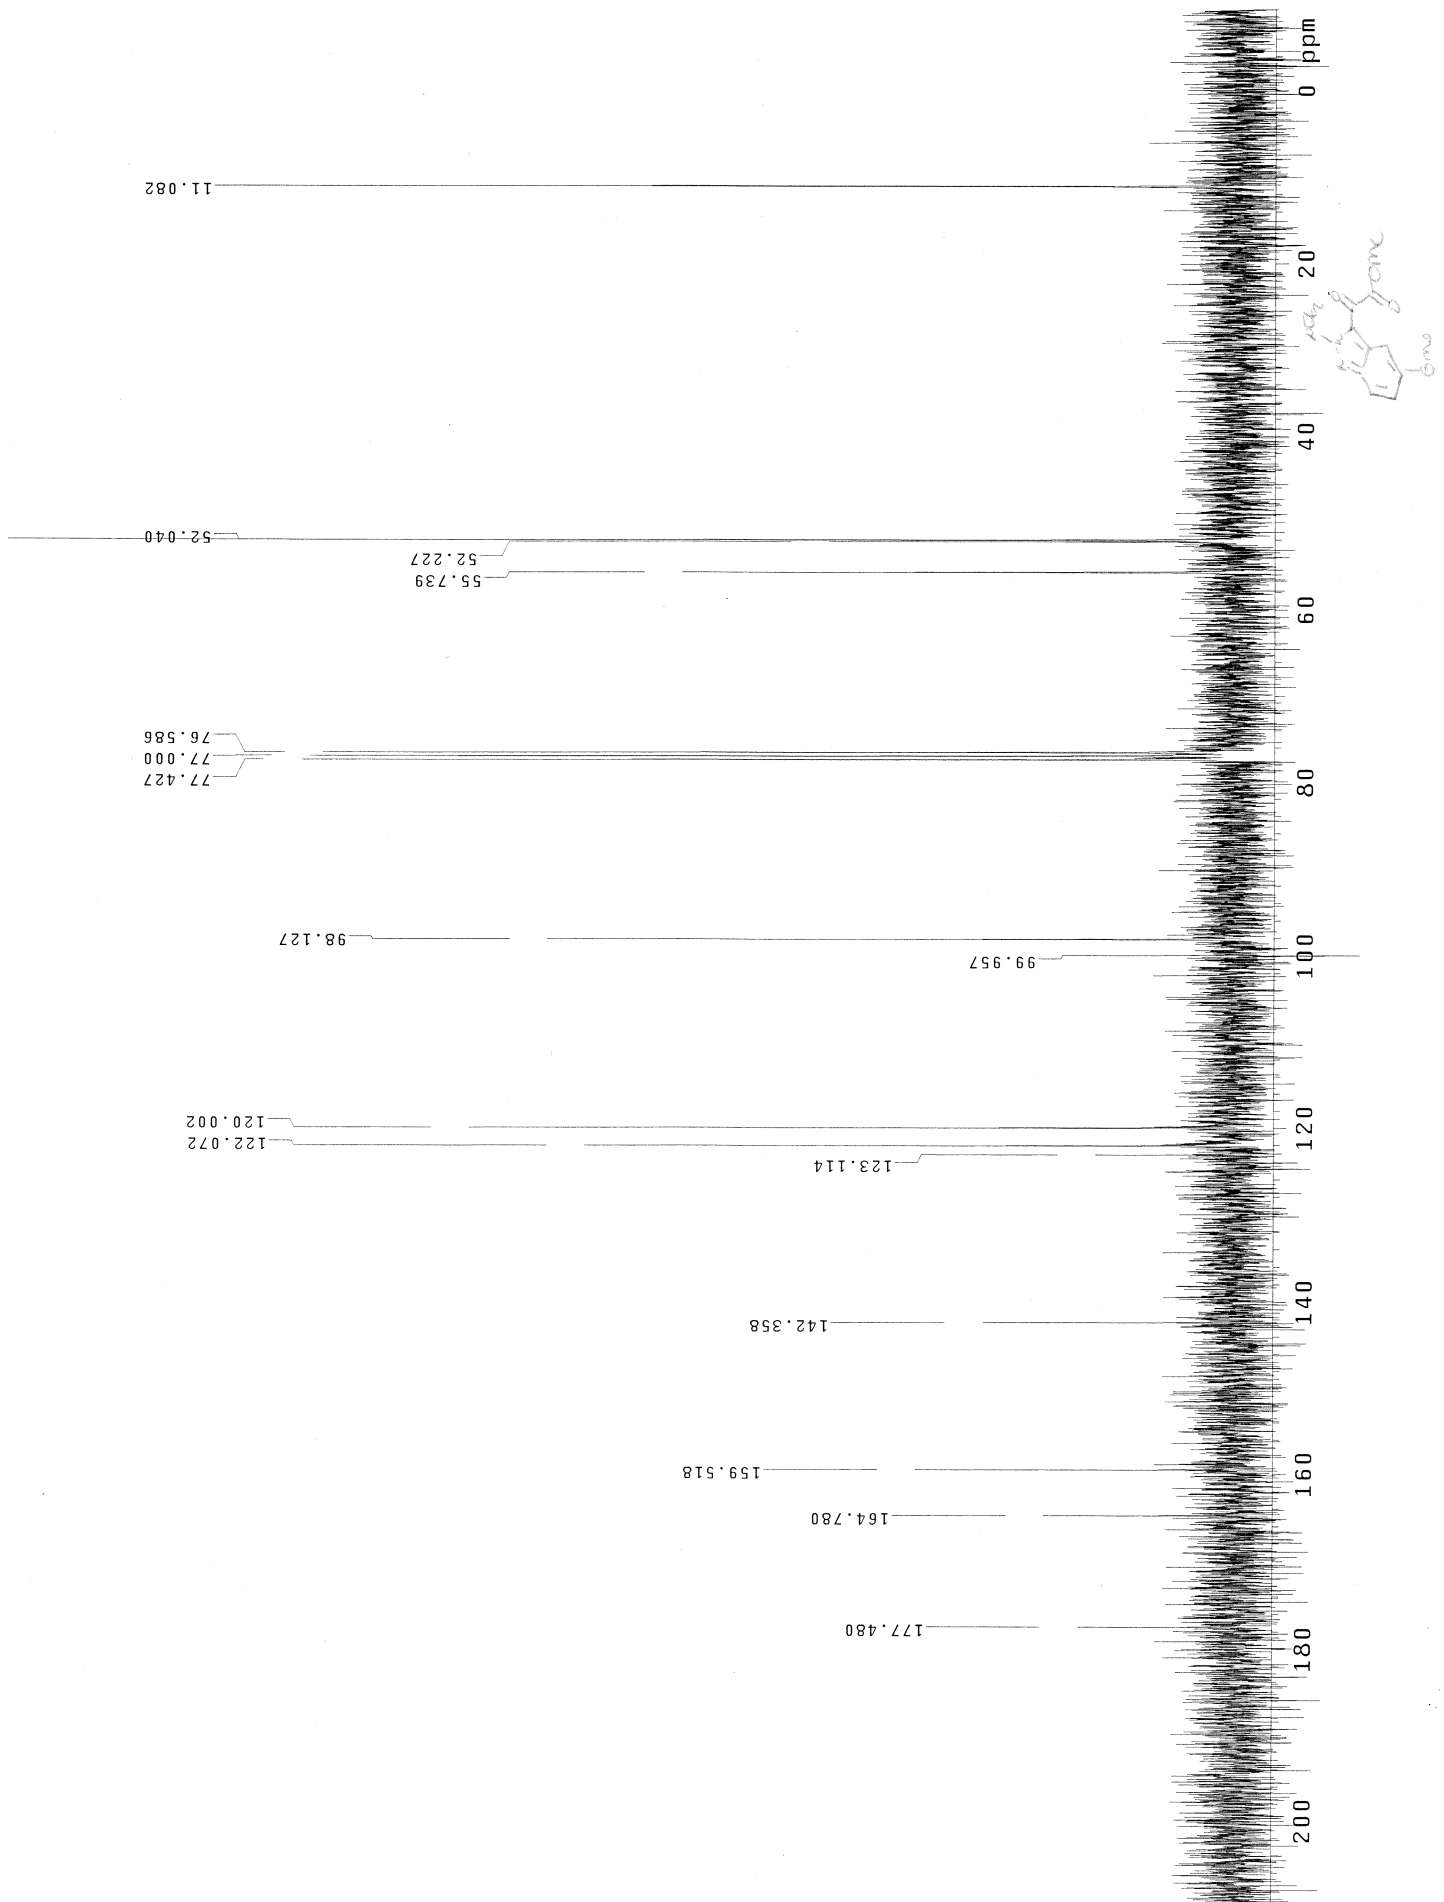

10a

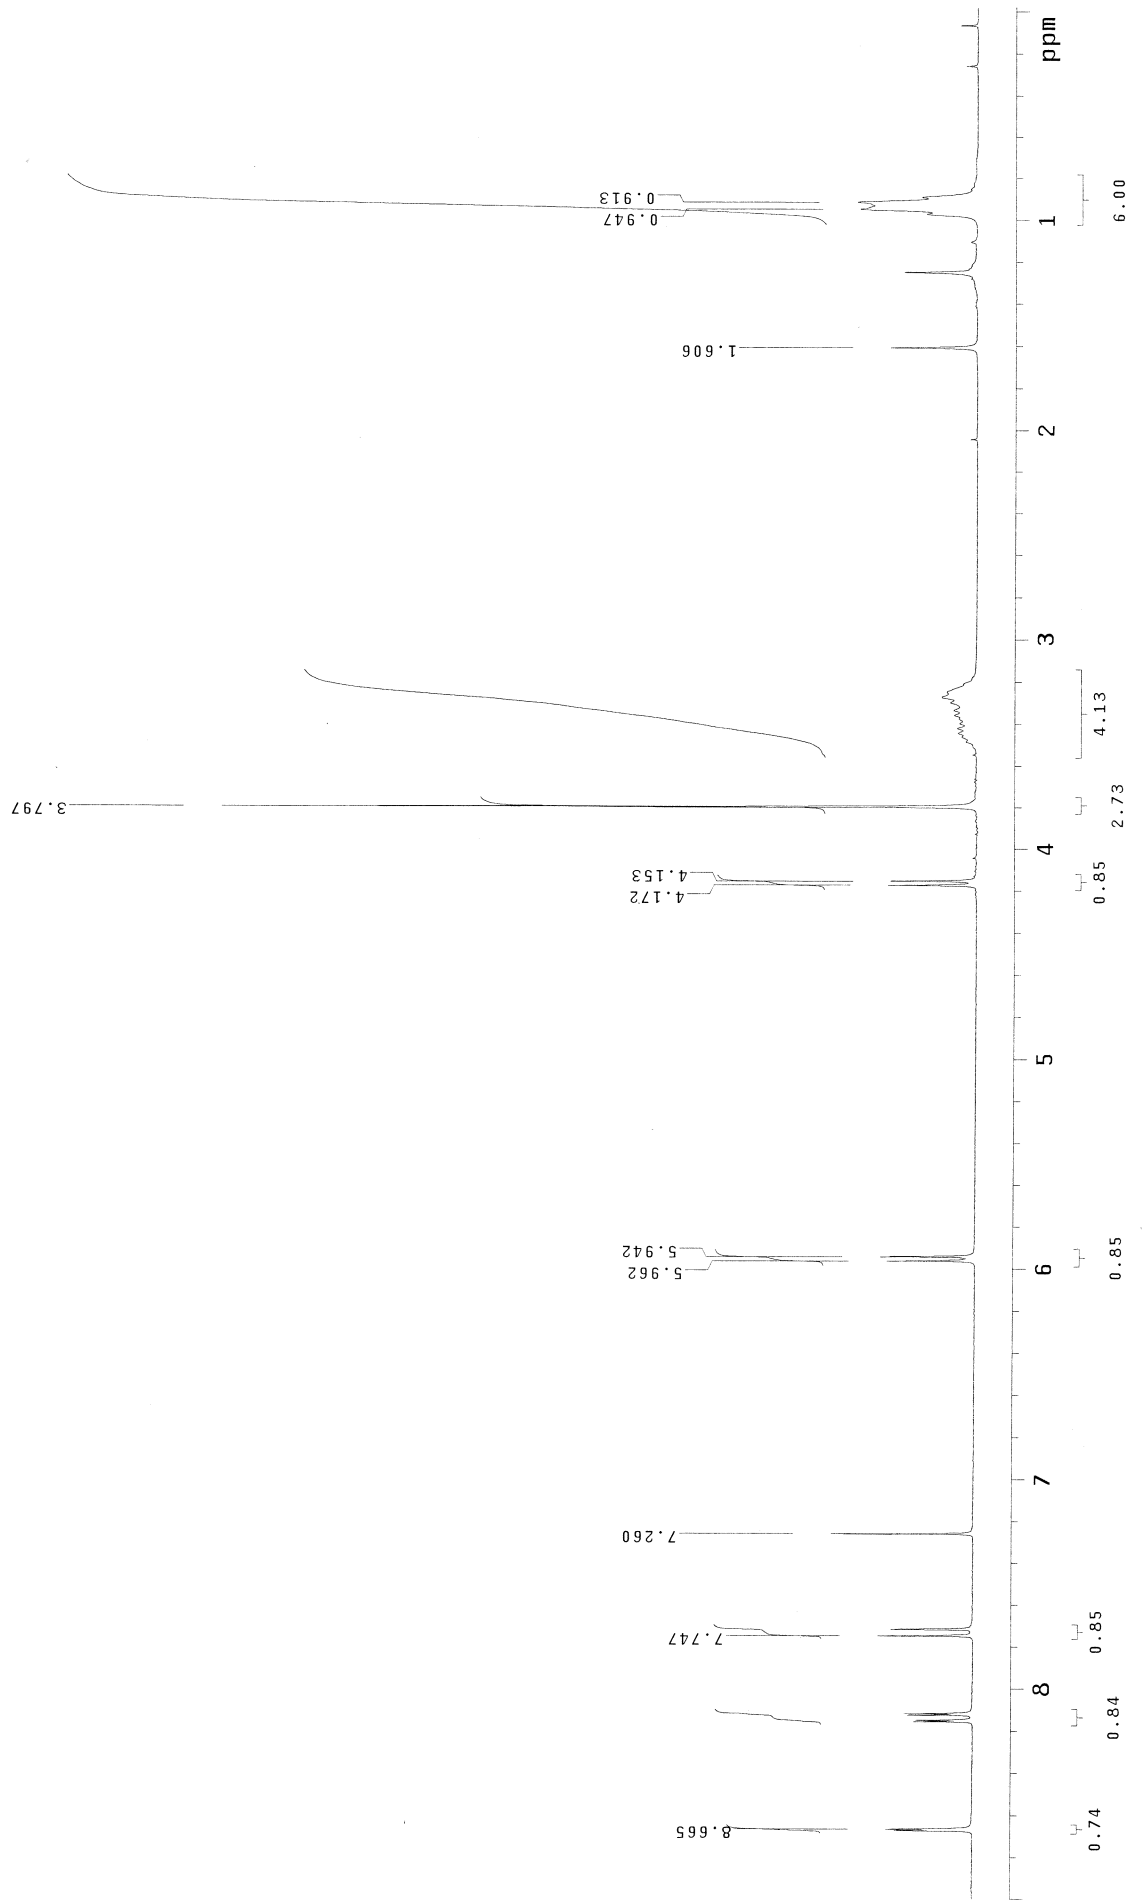

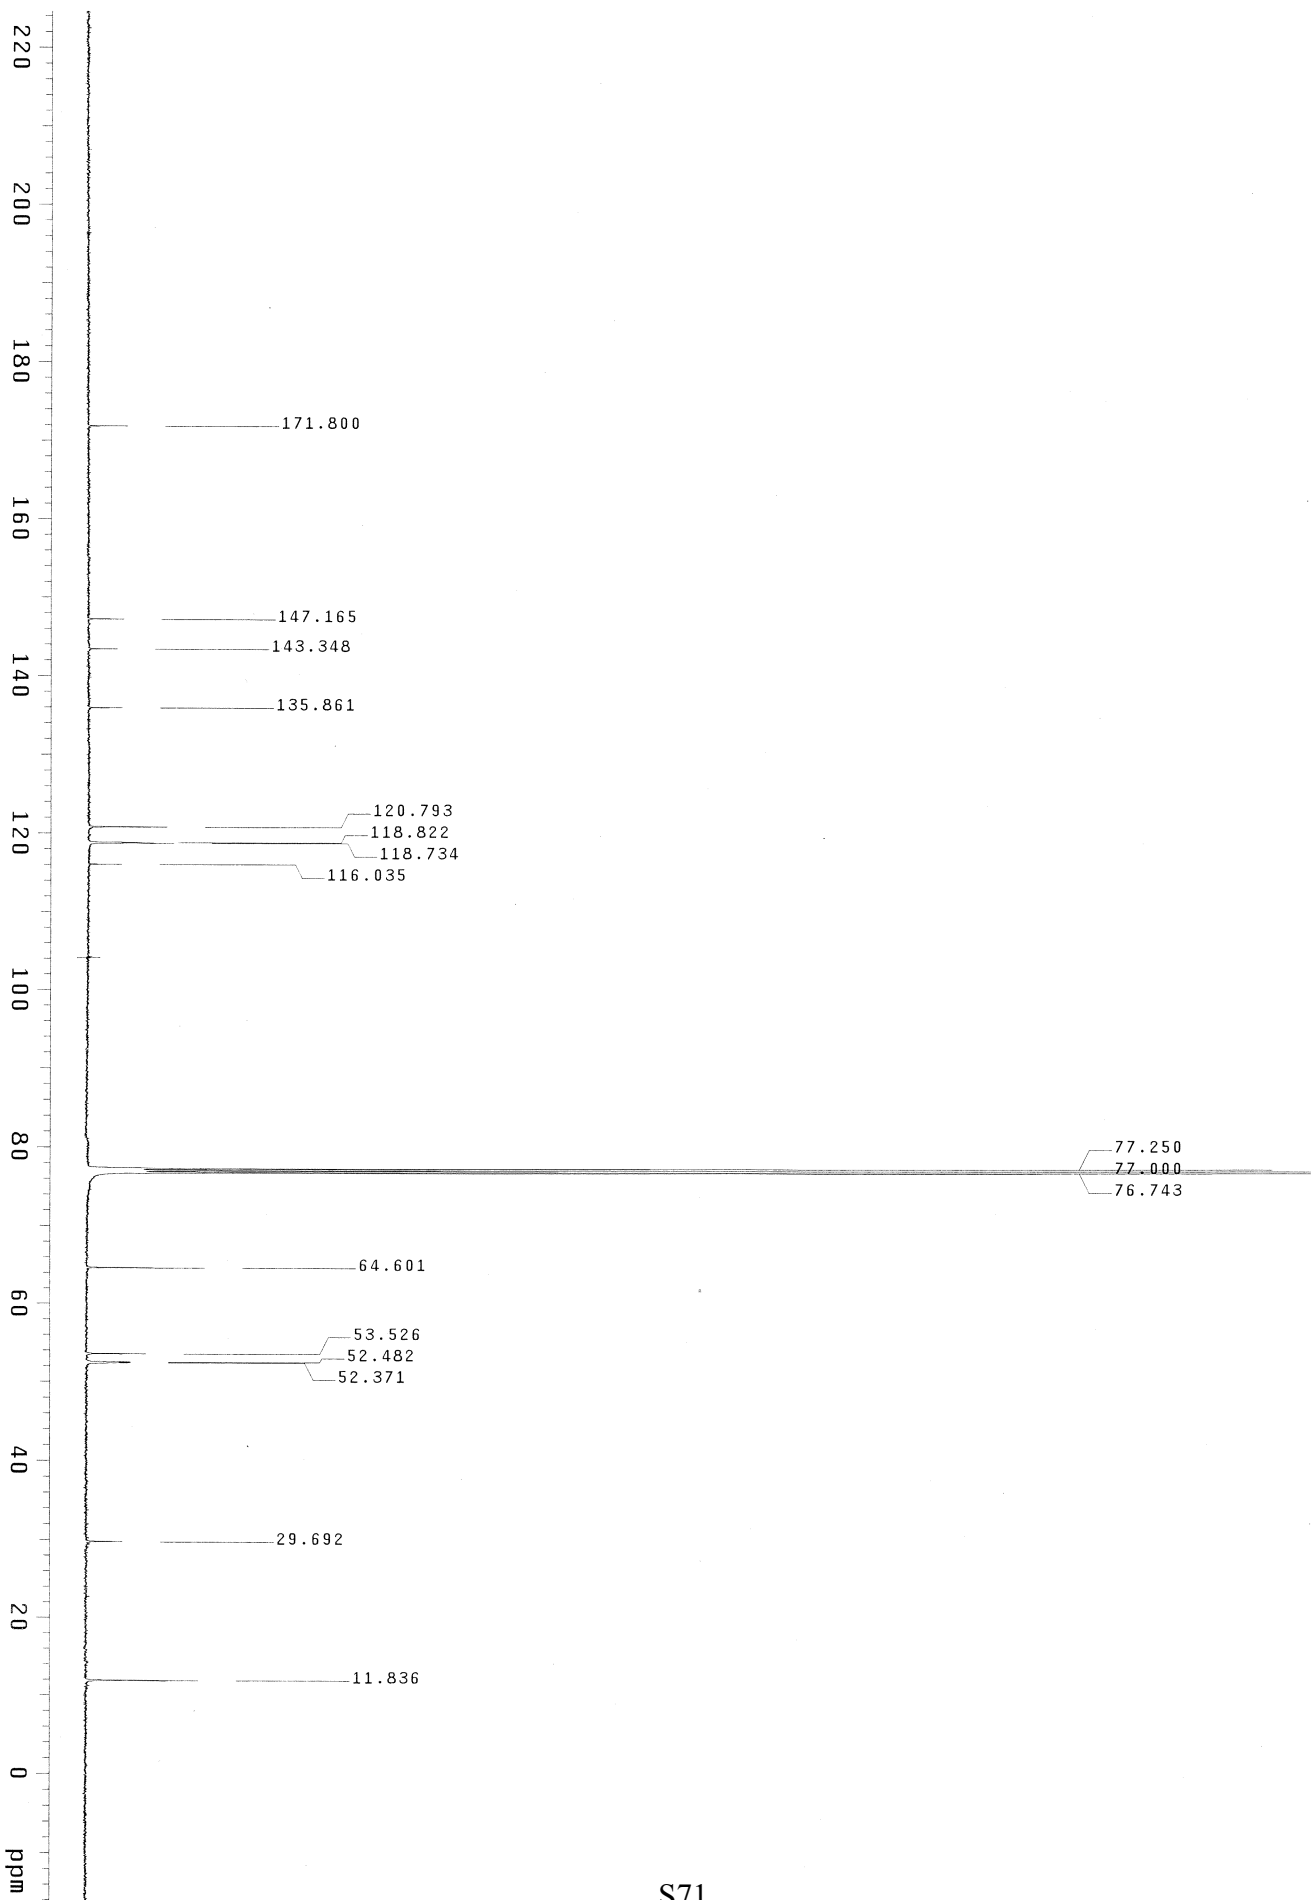

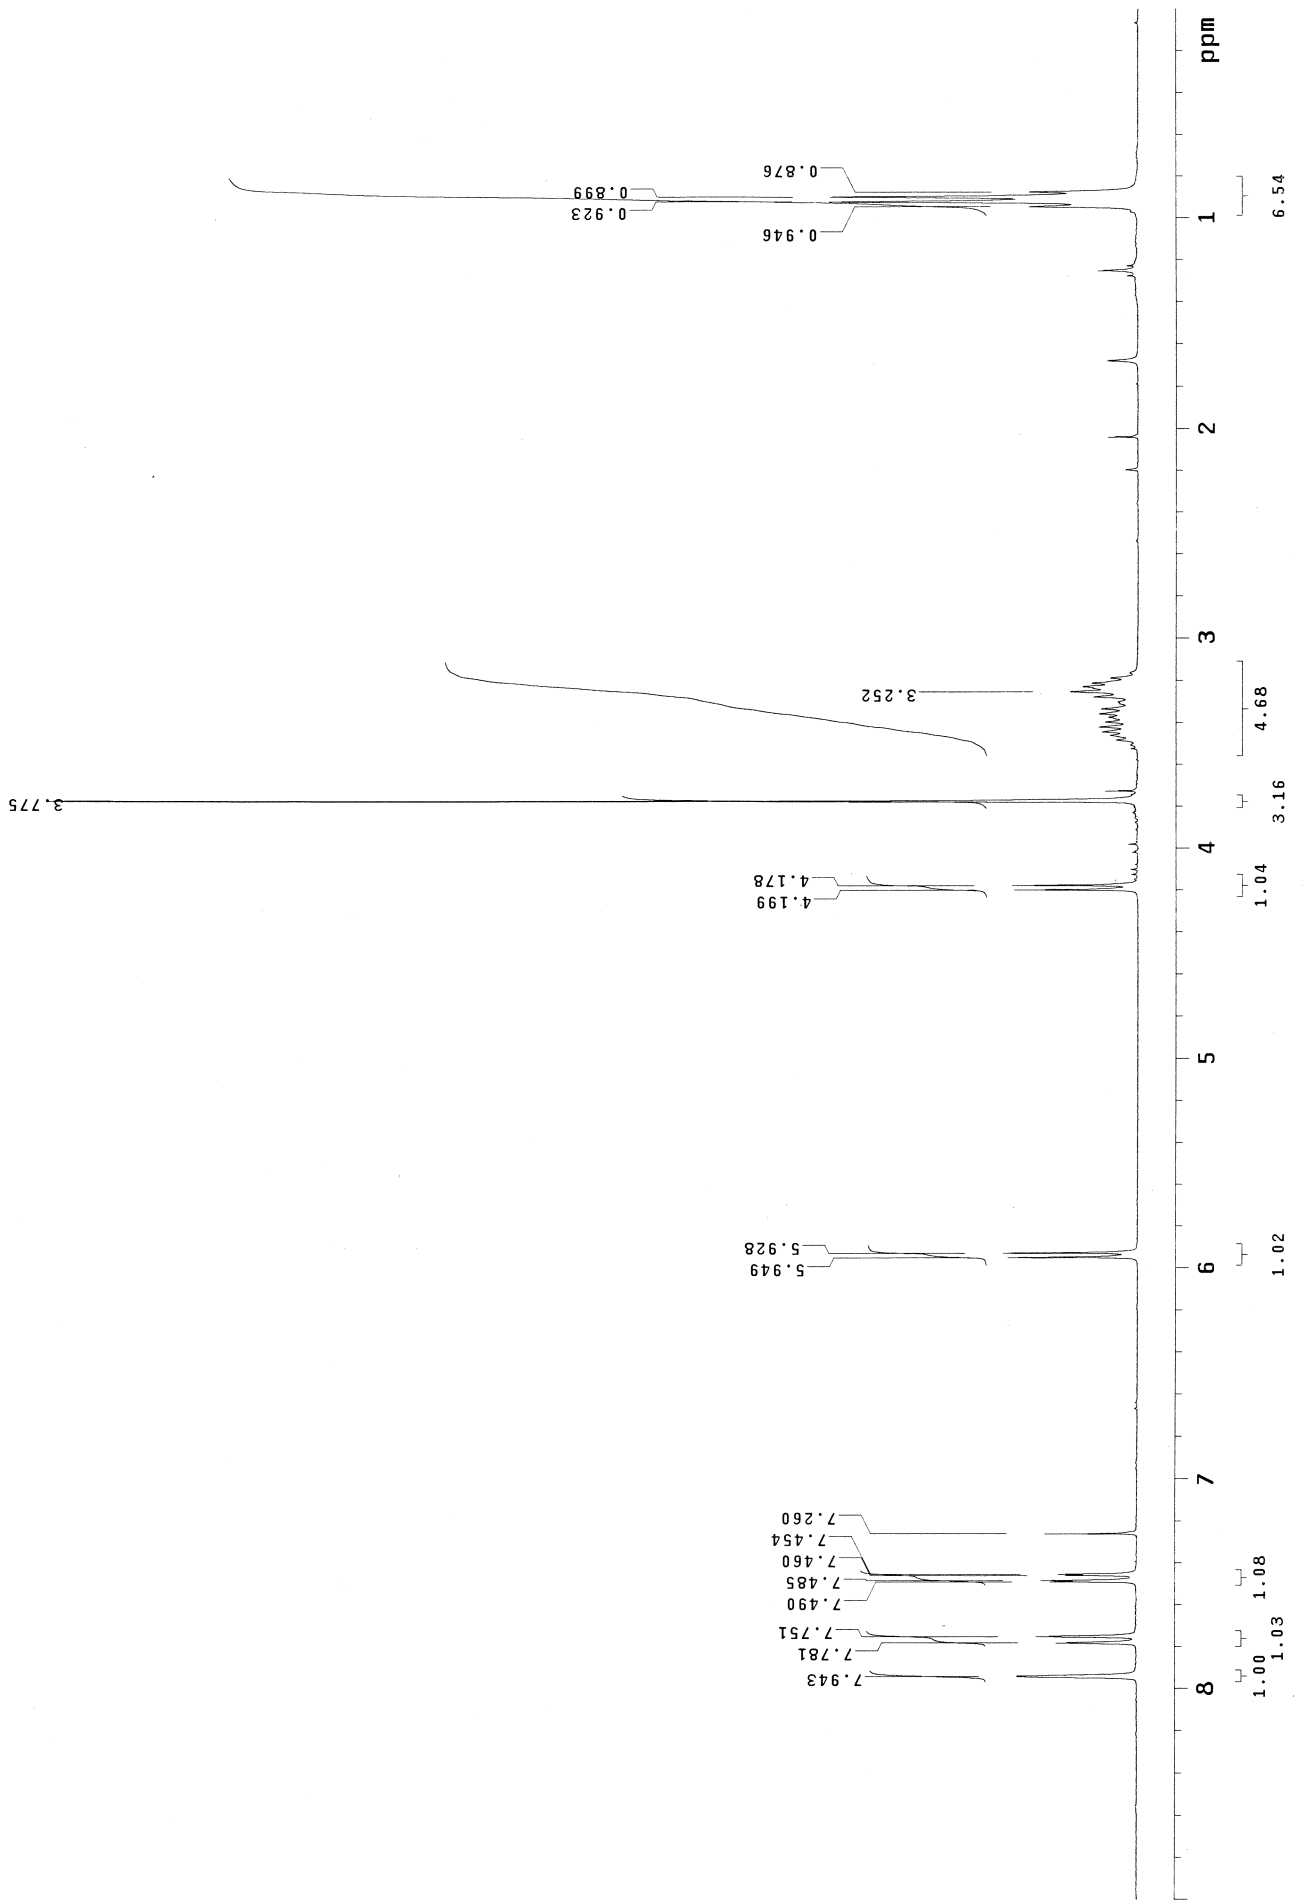



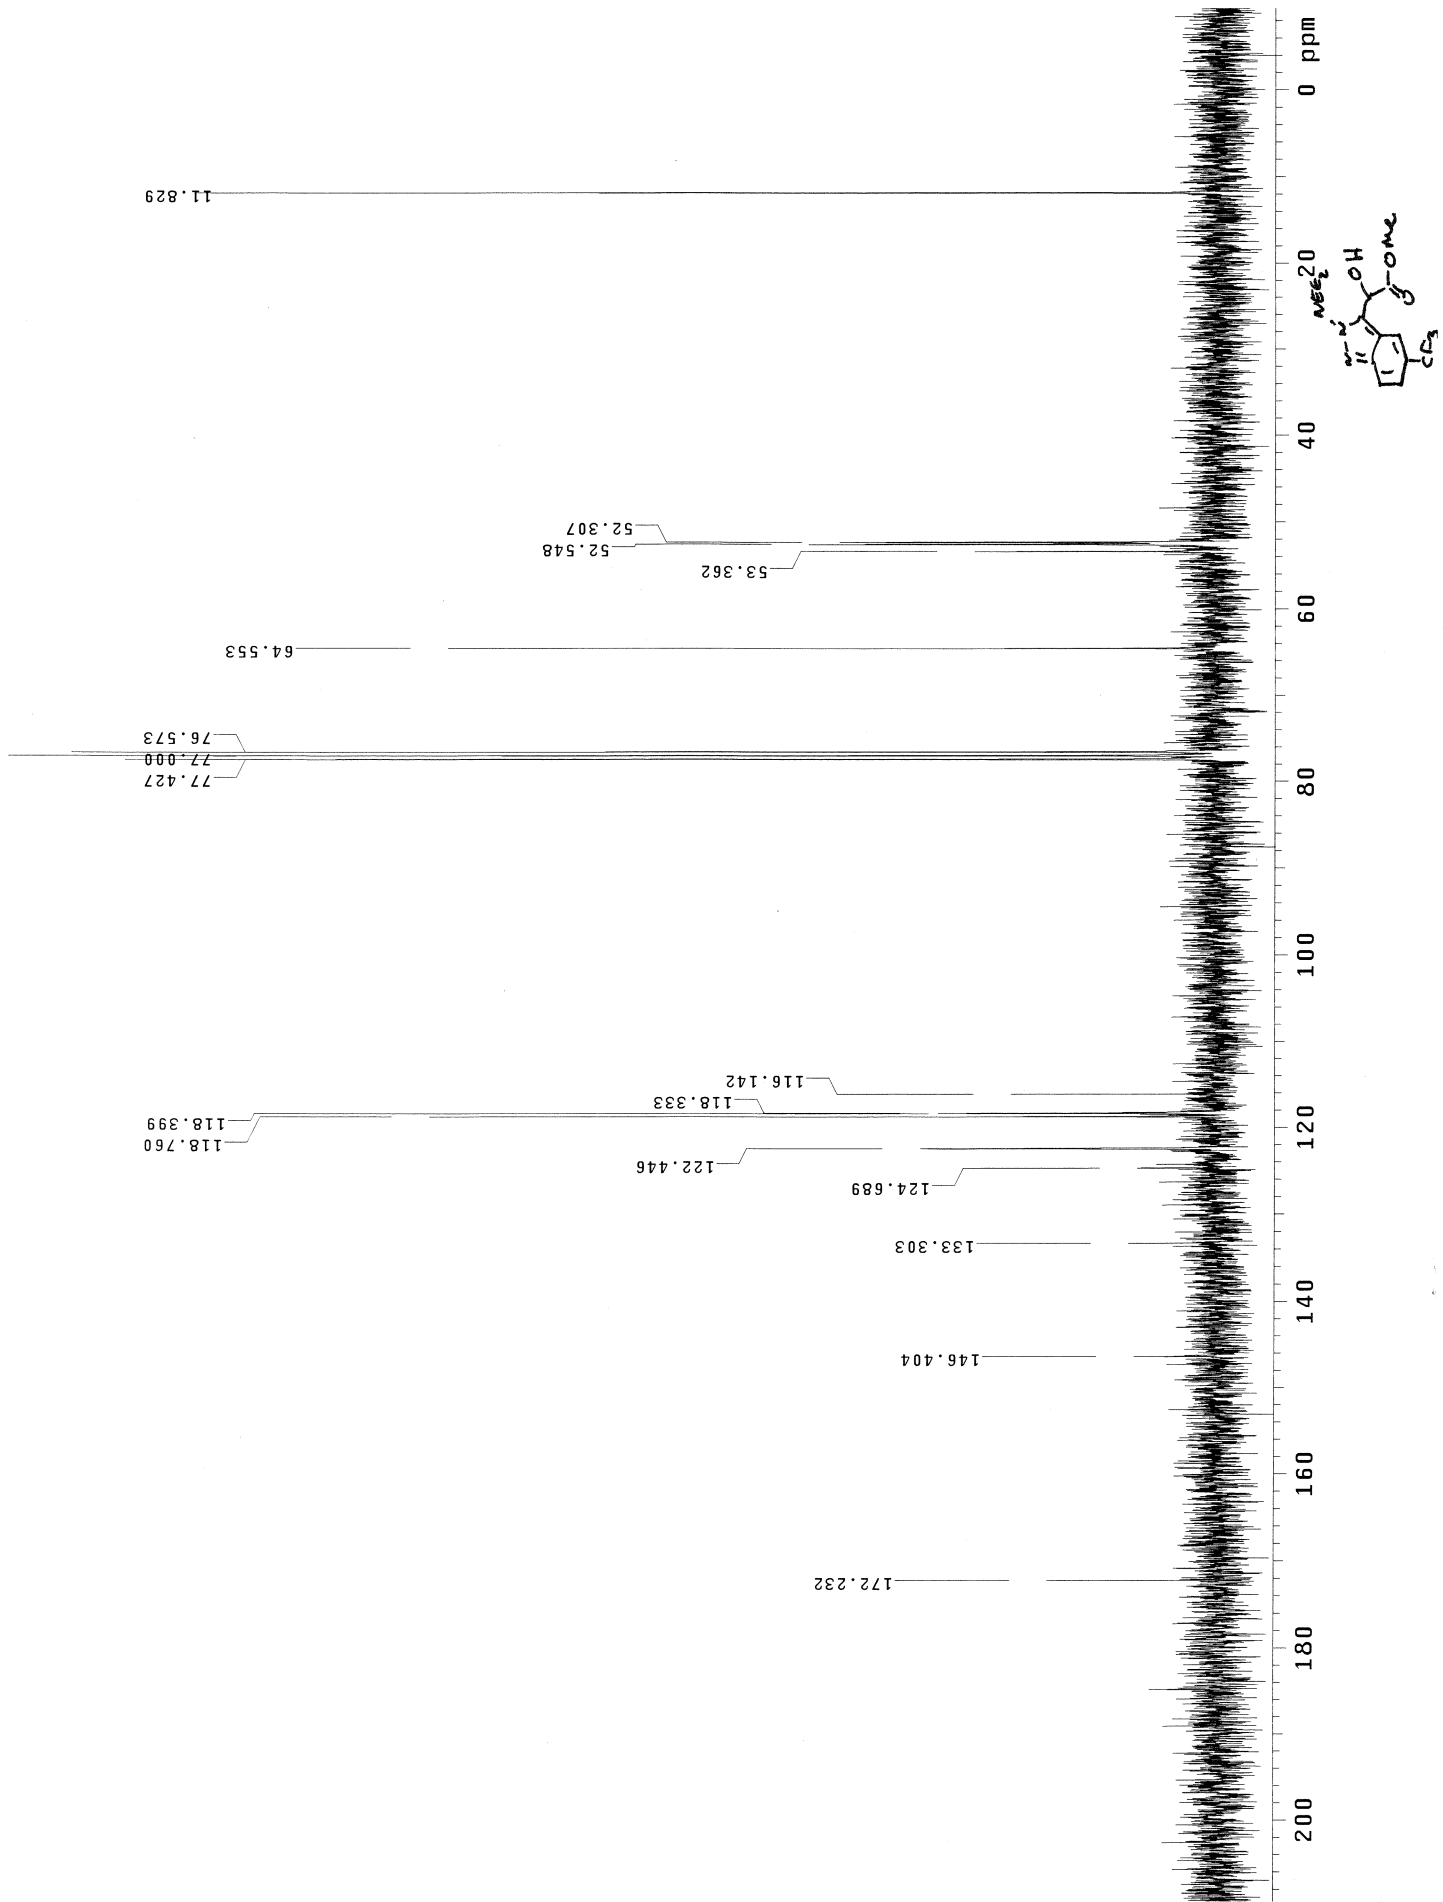

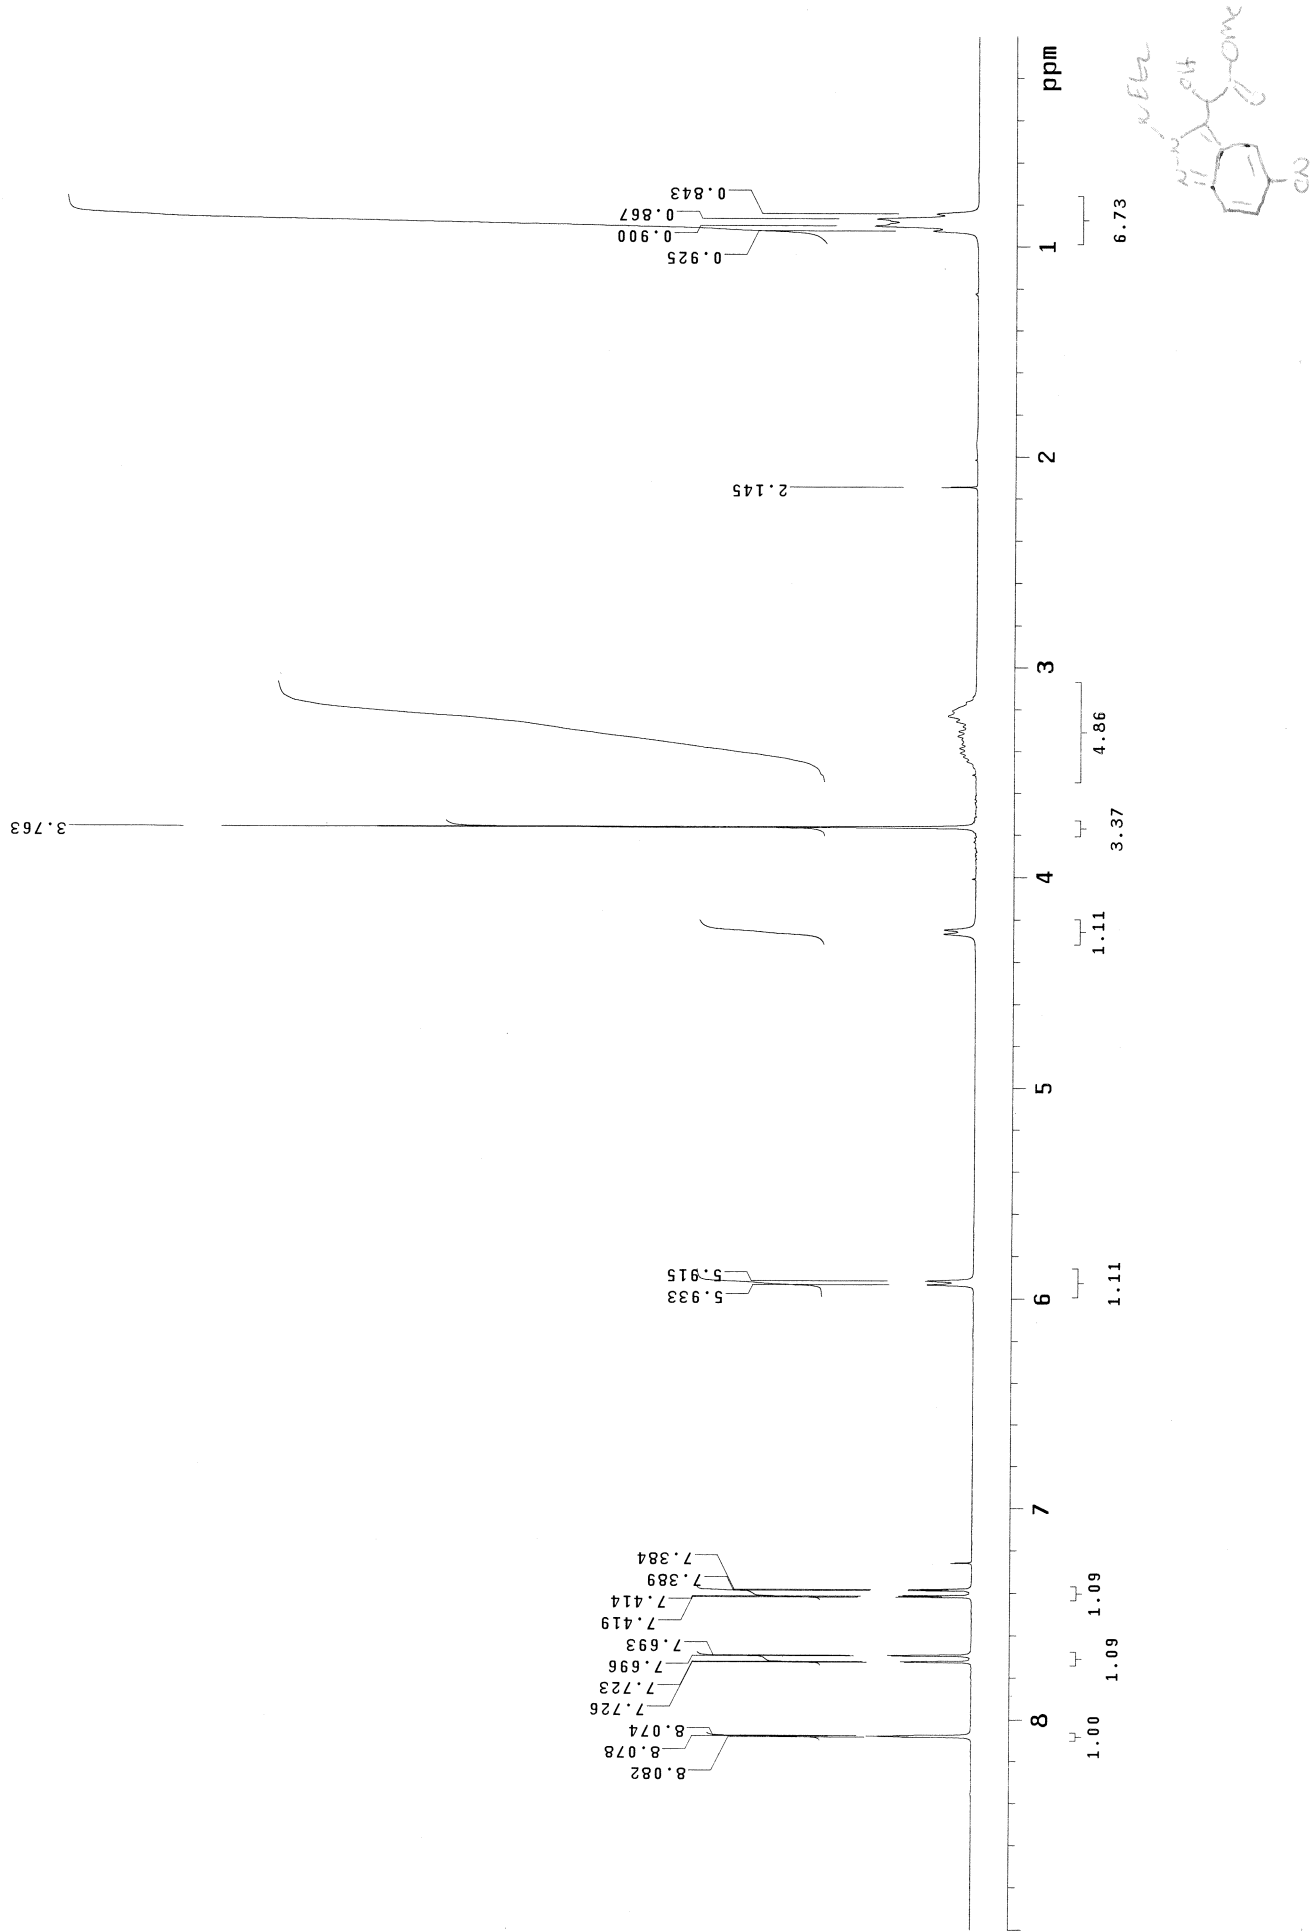

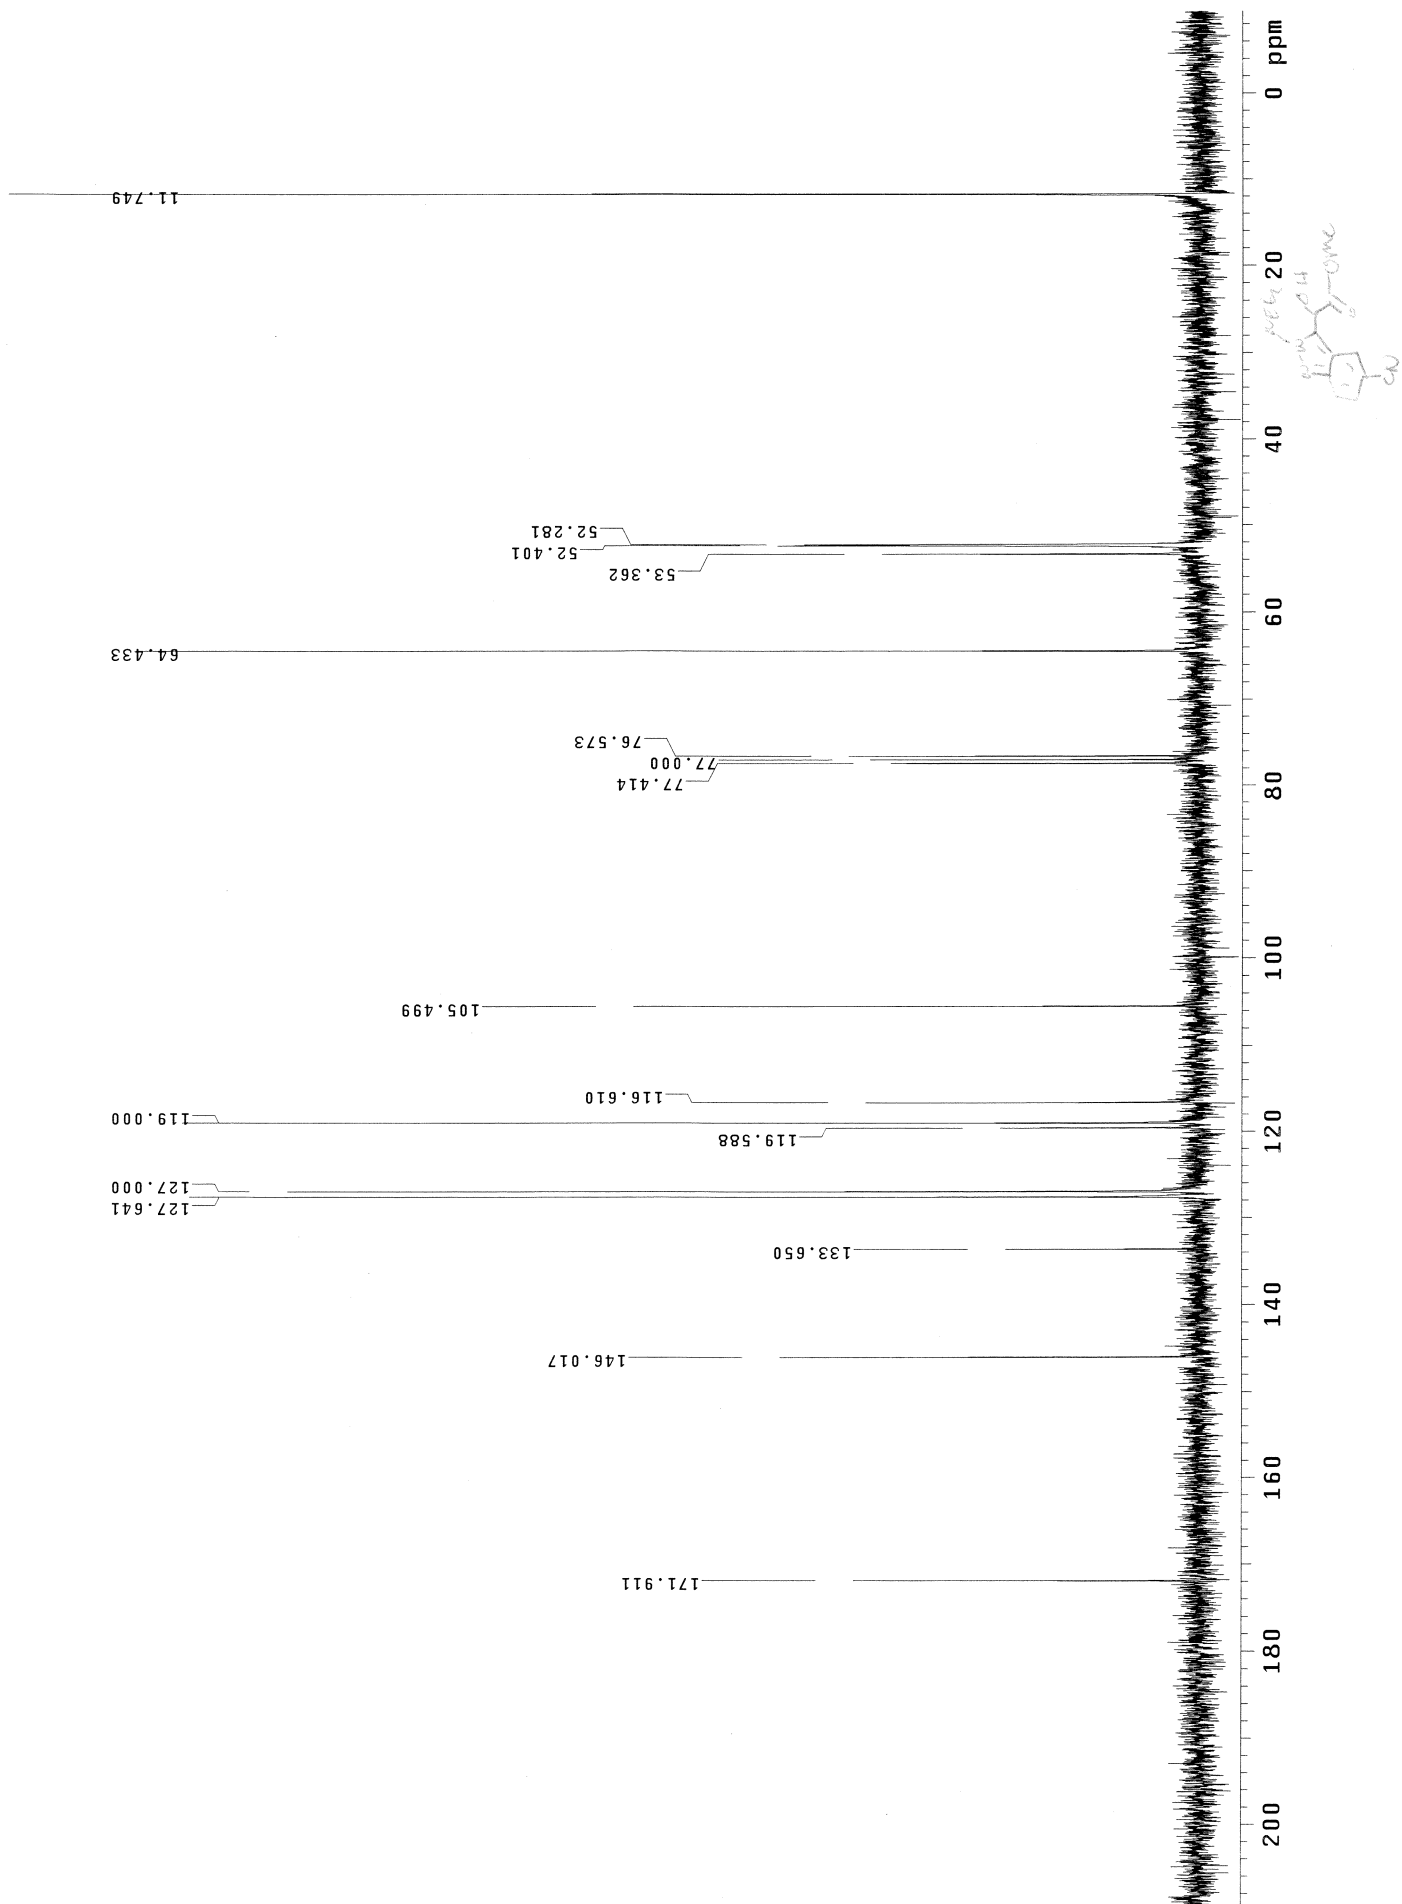

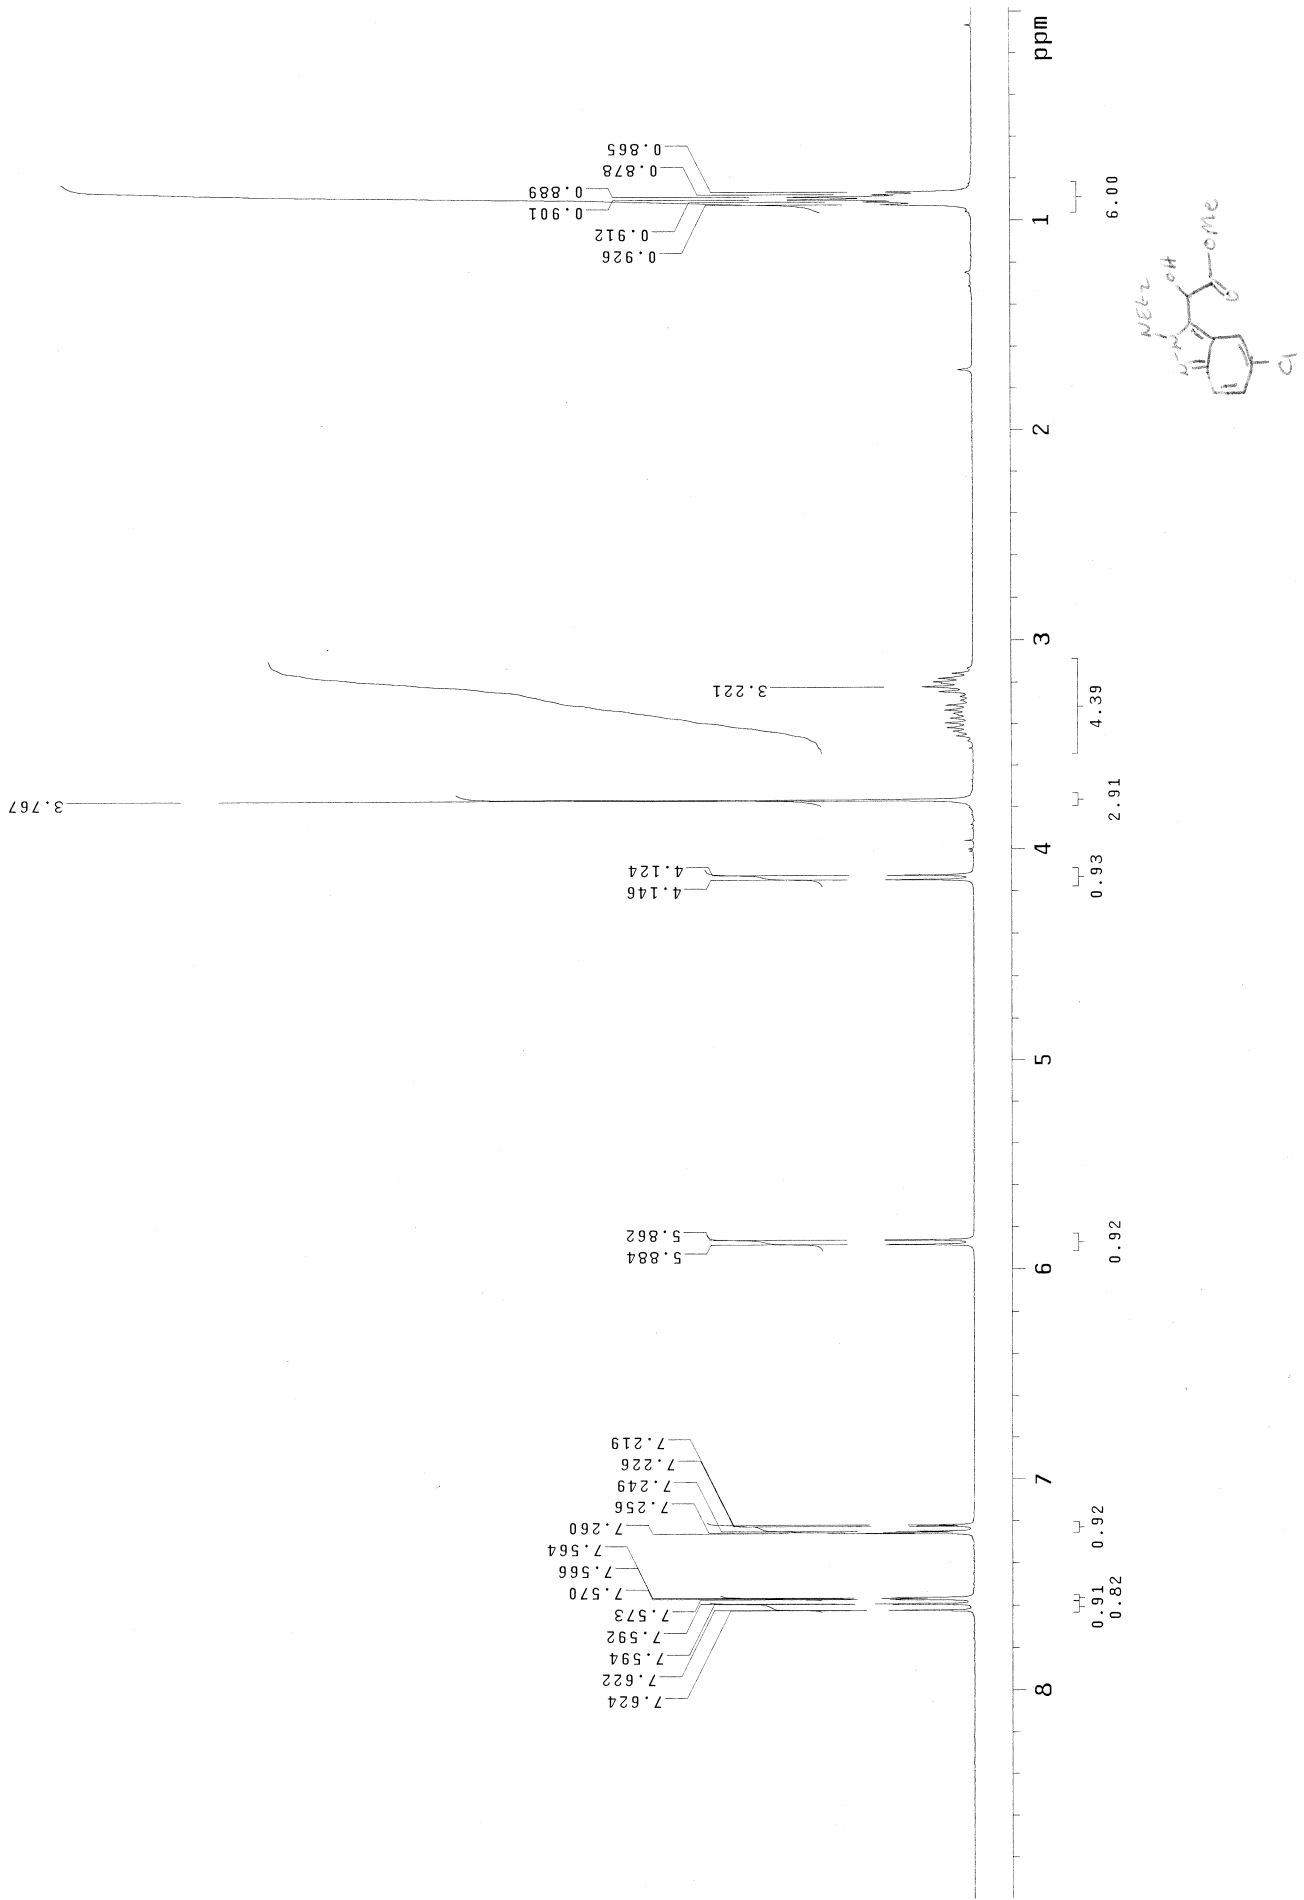

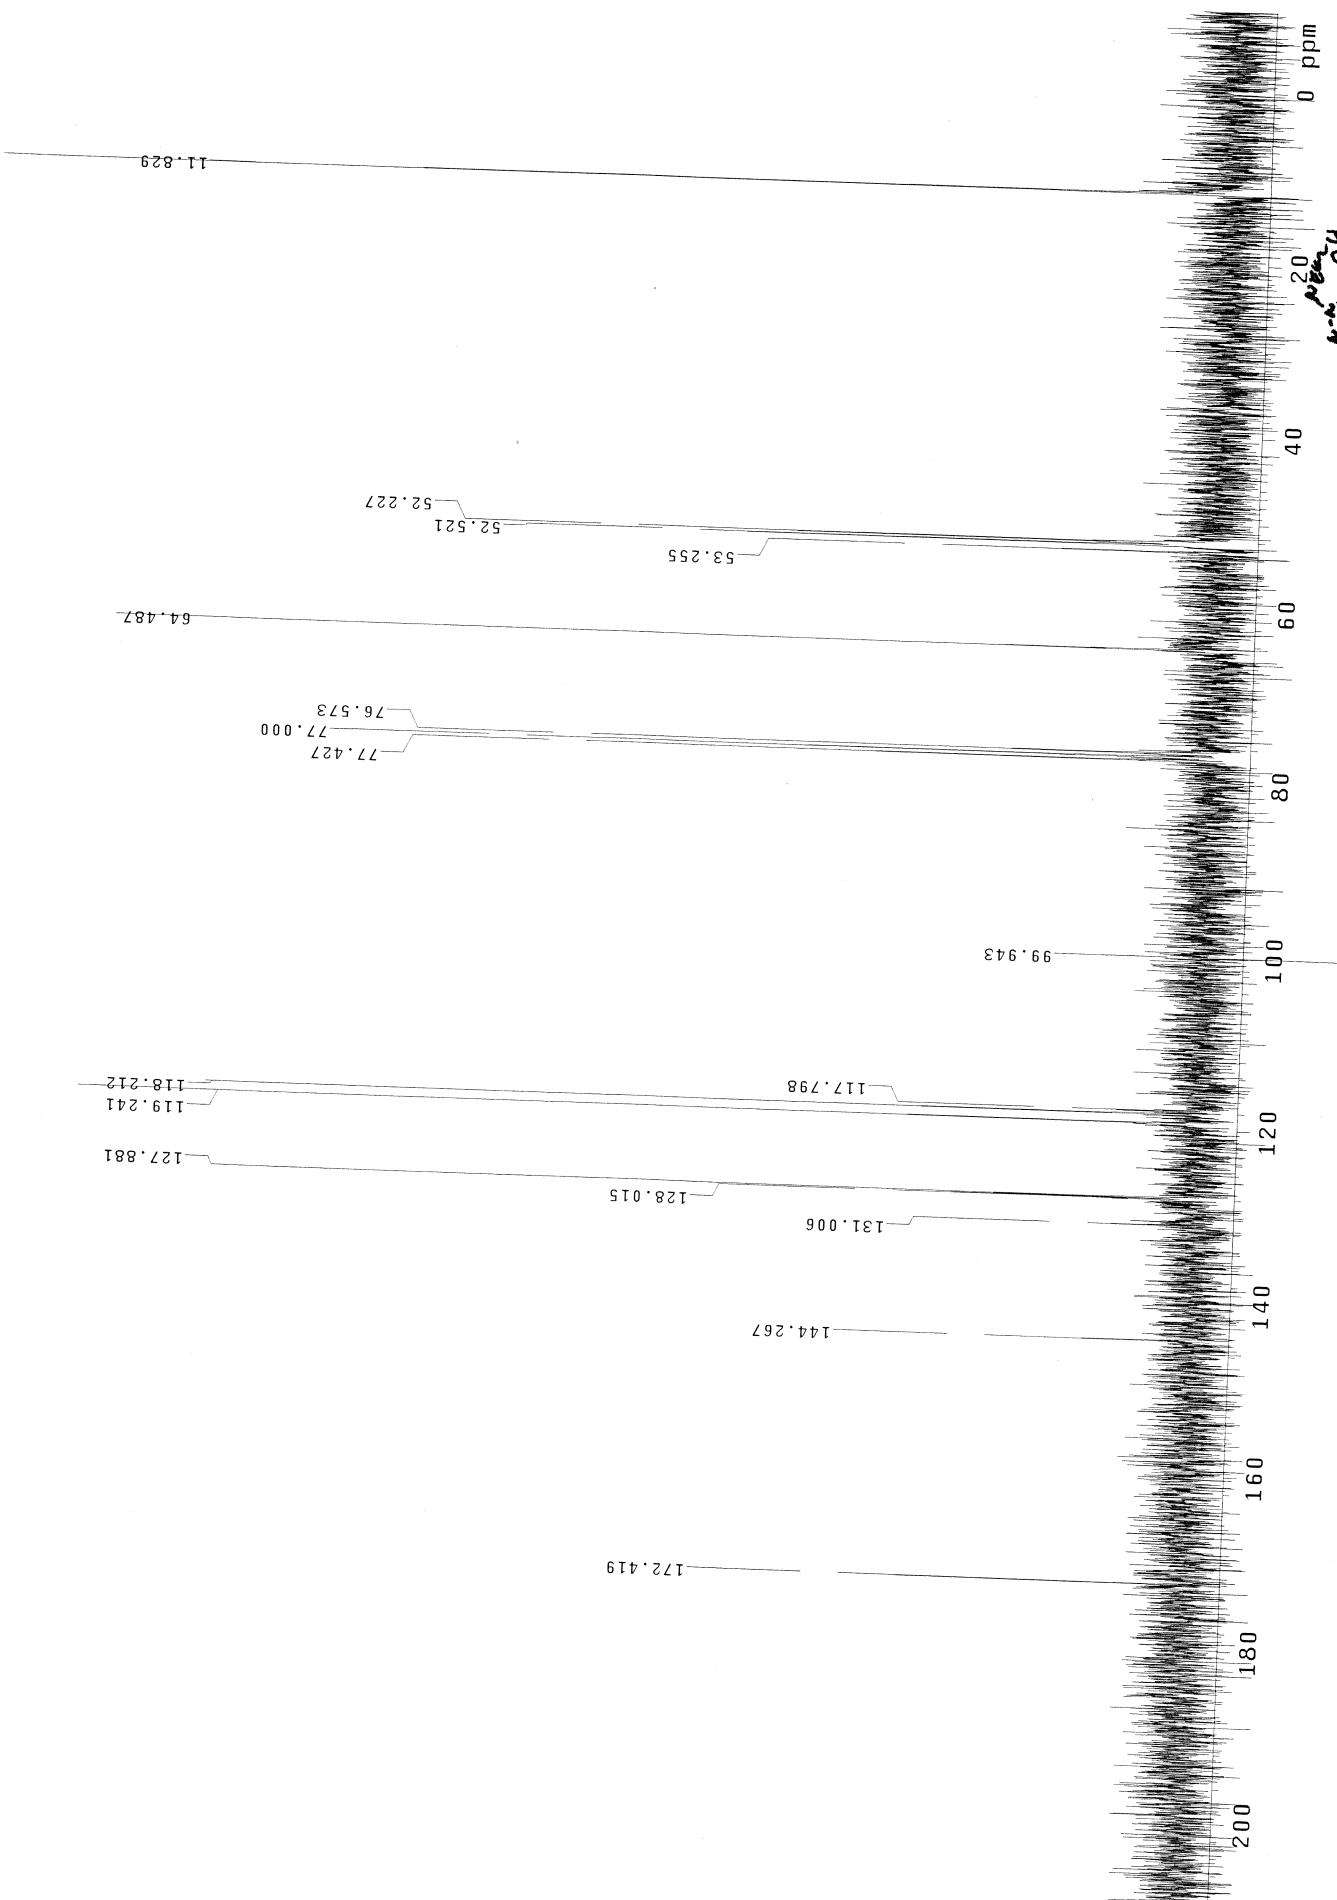

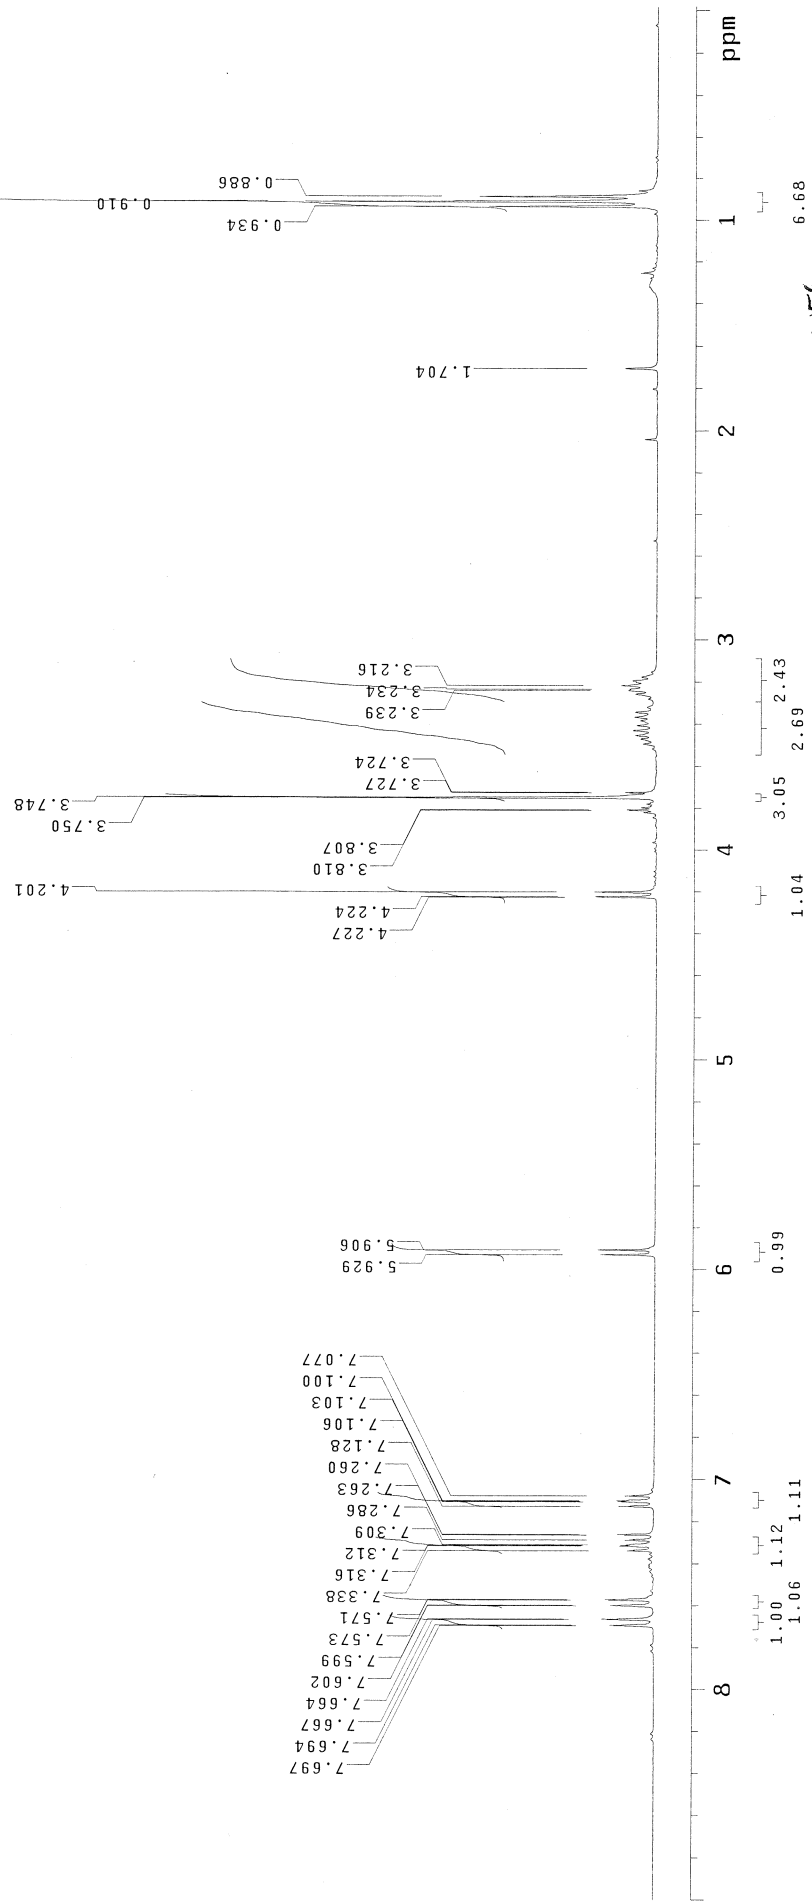

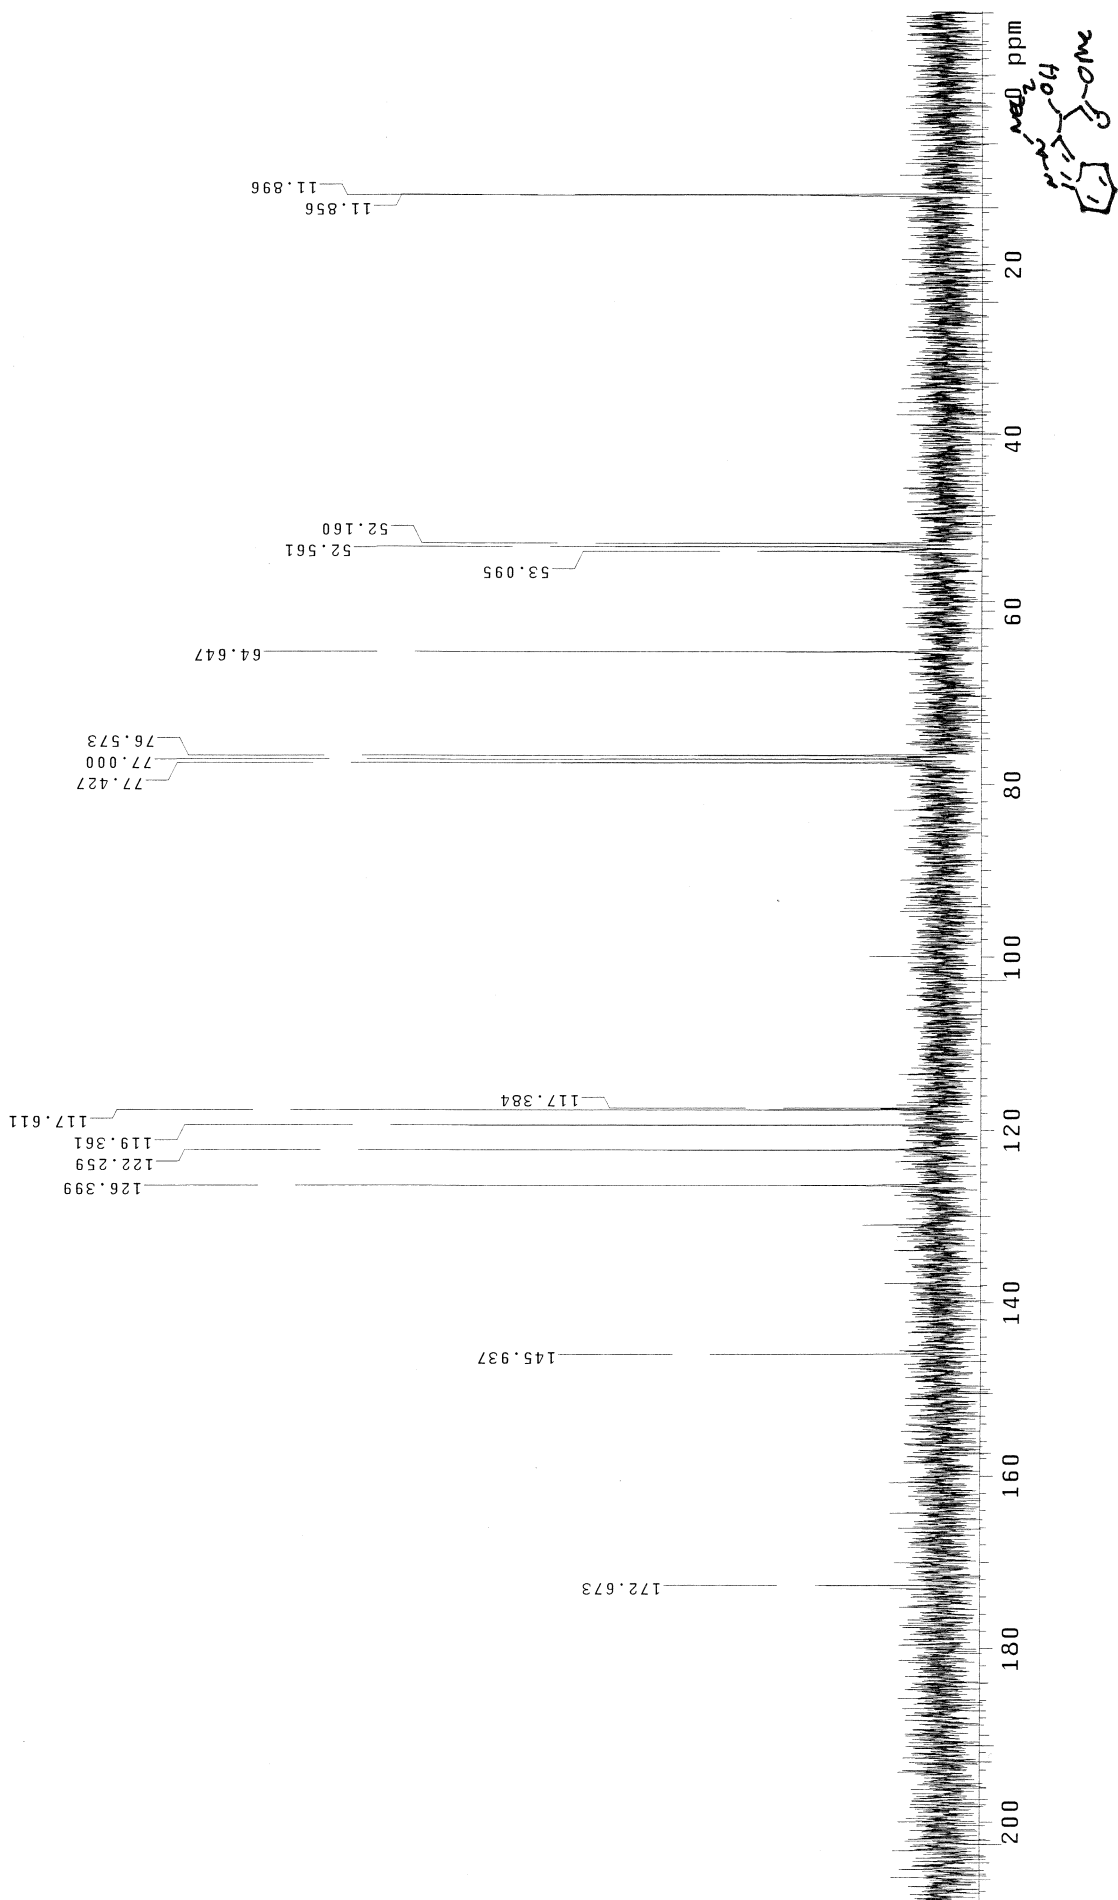

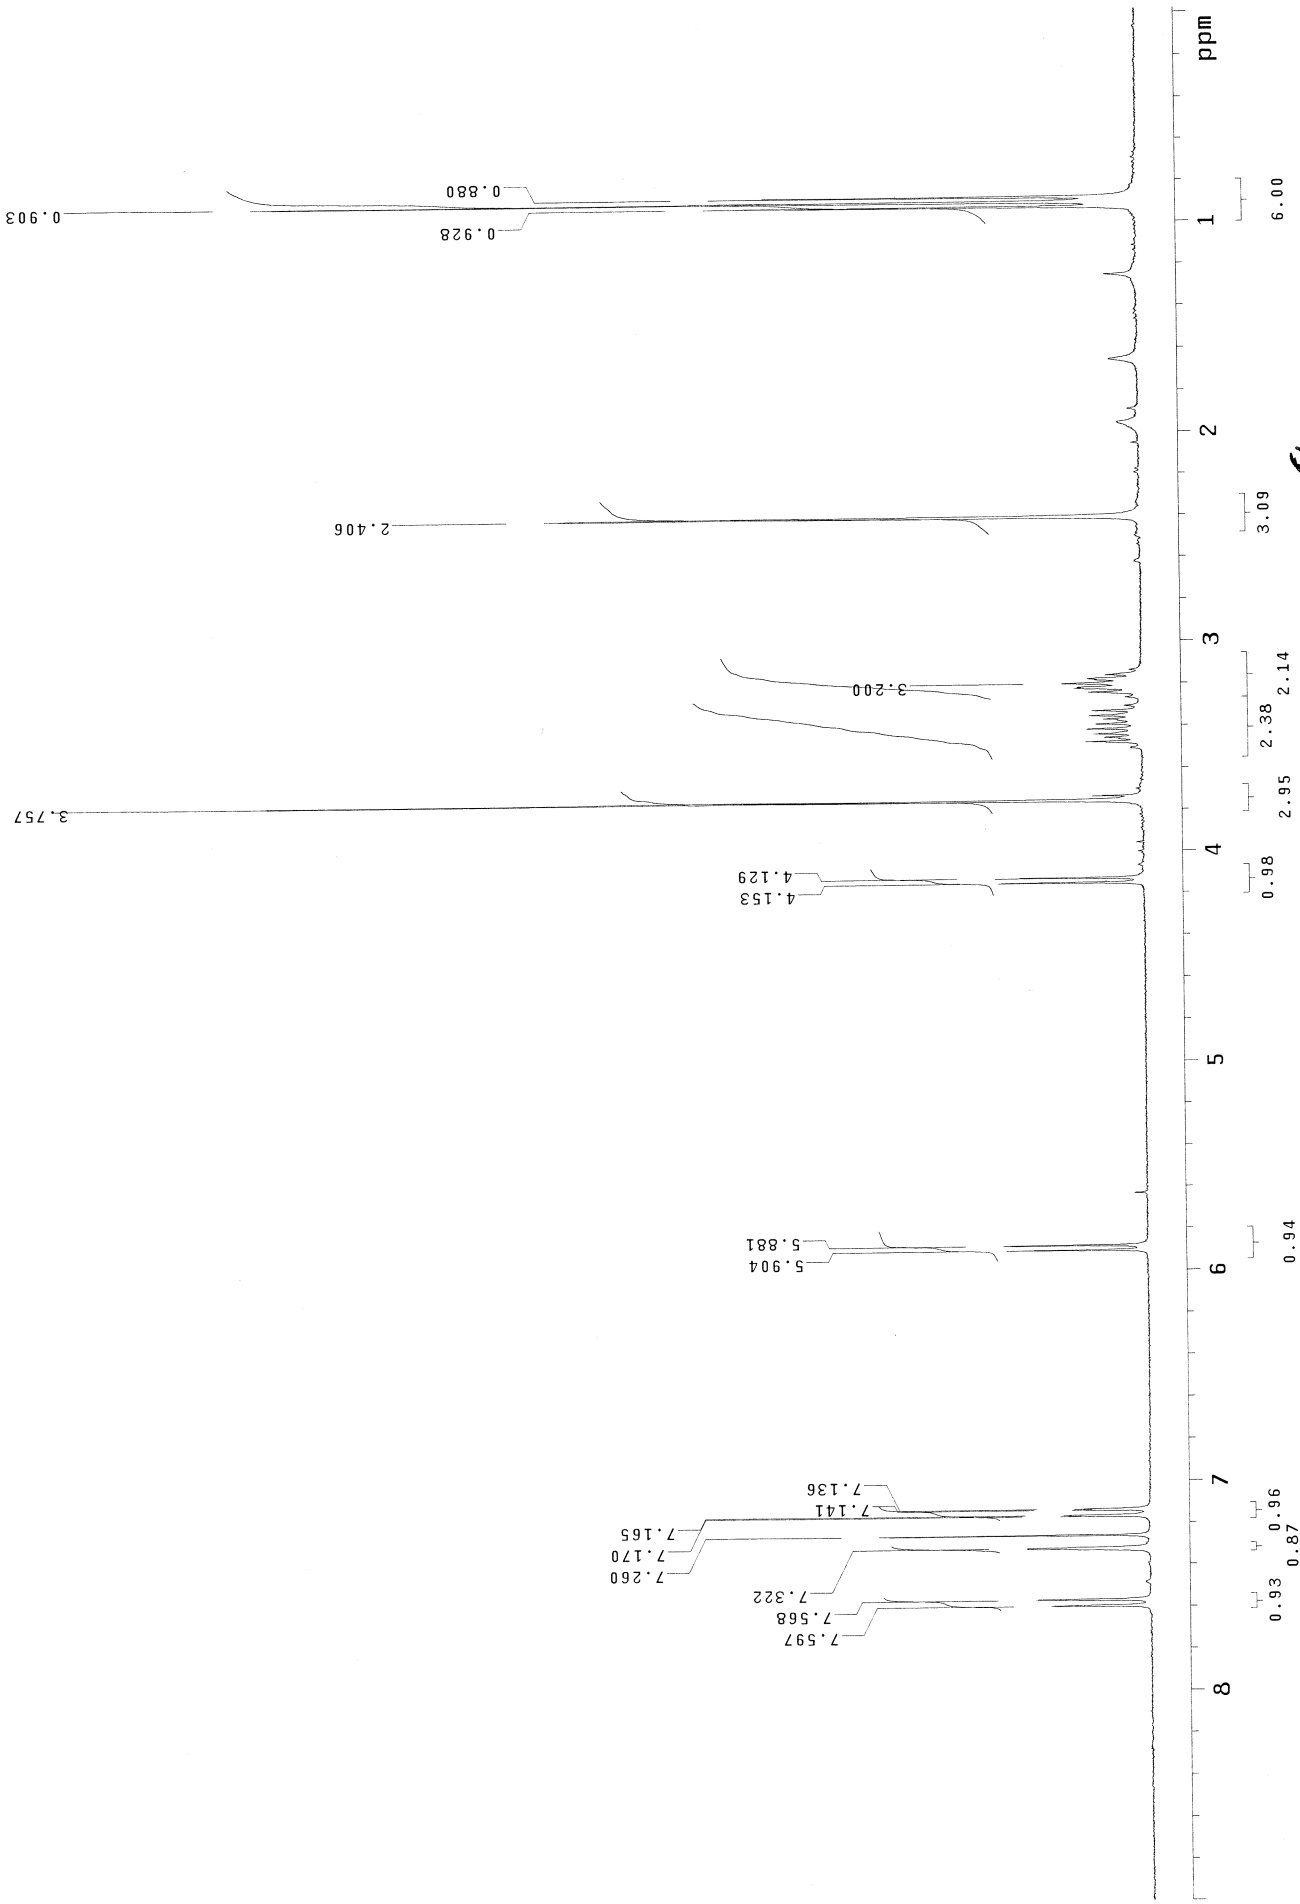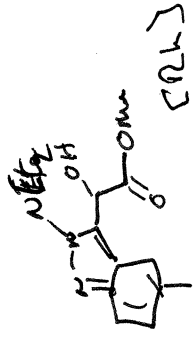



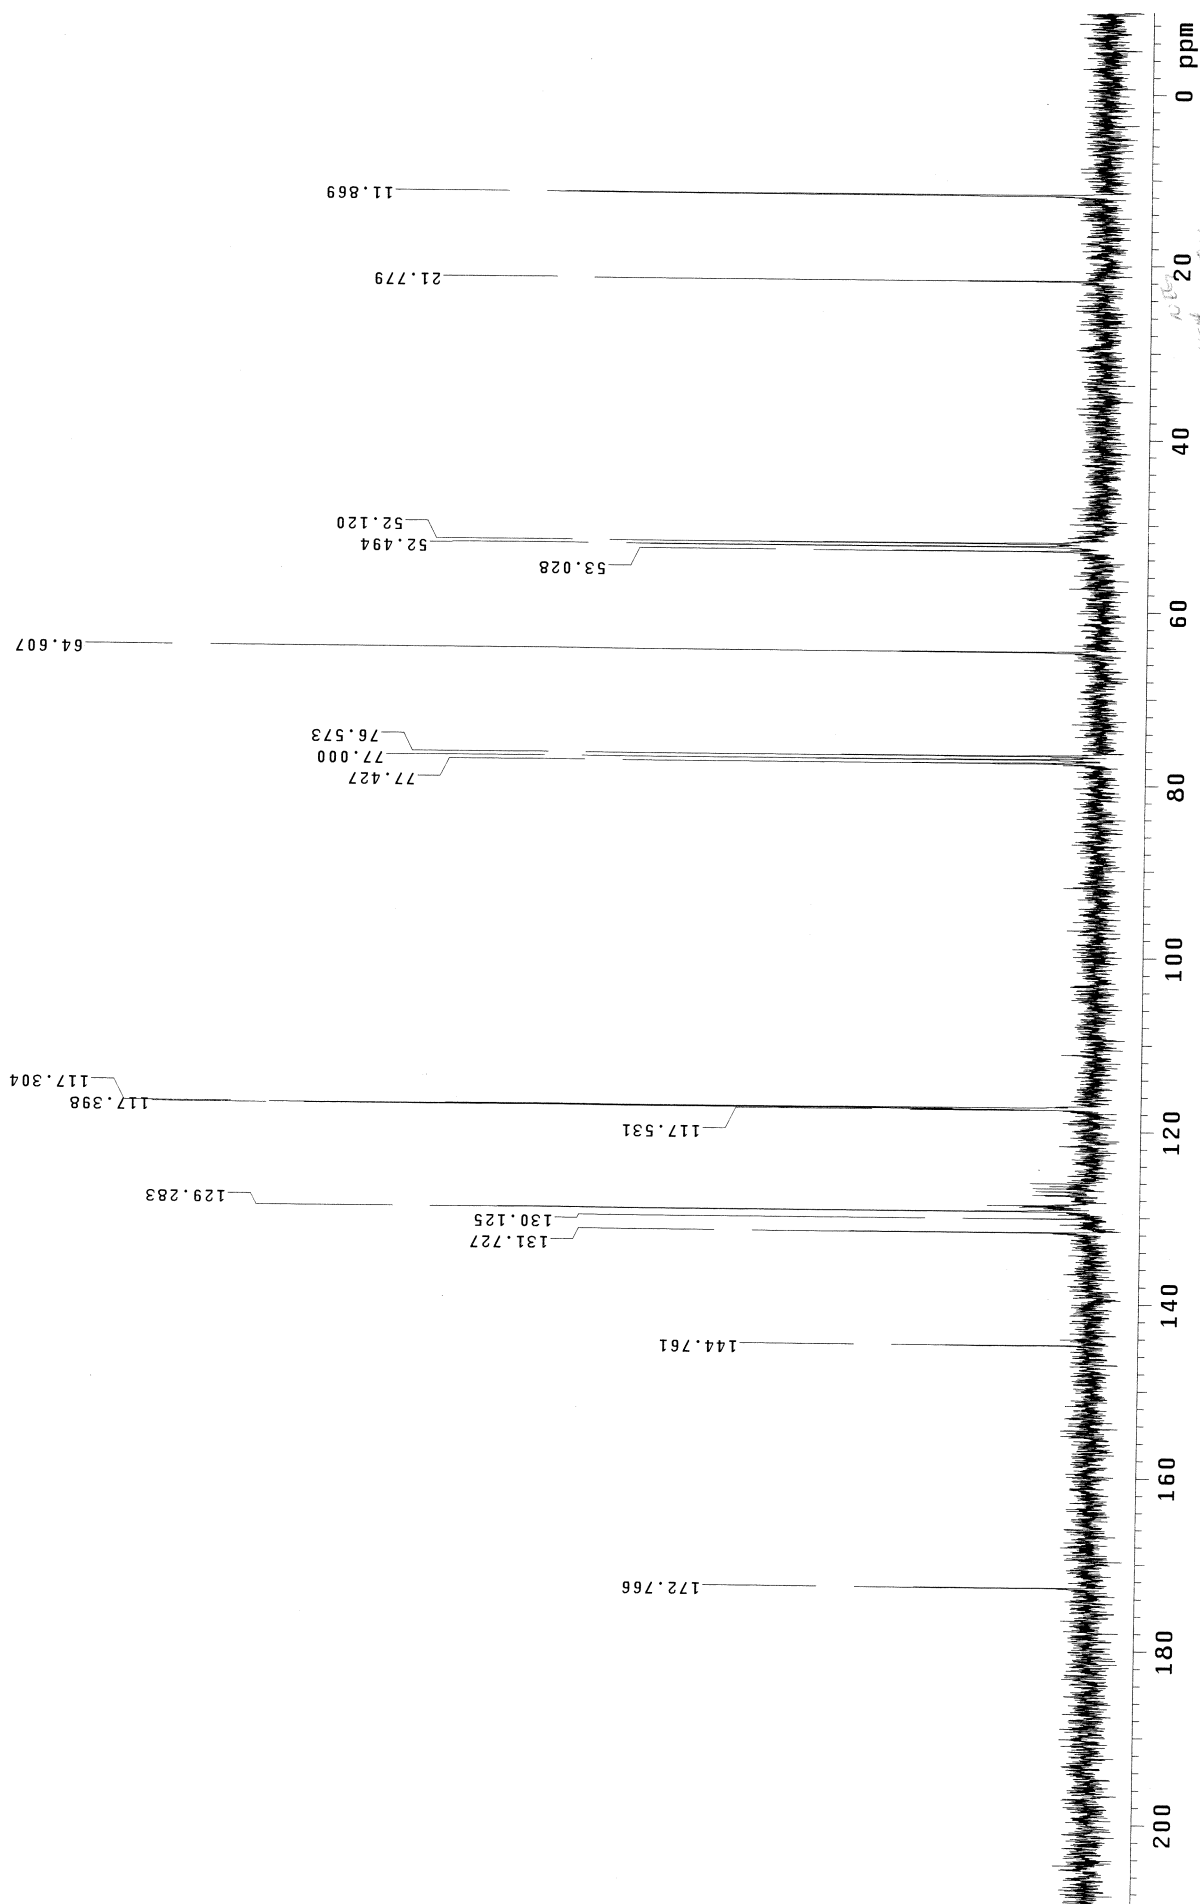

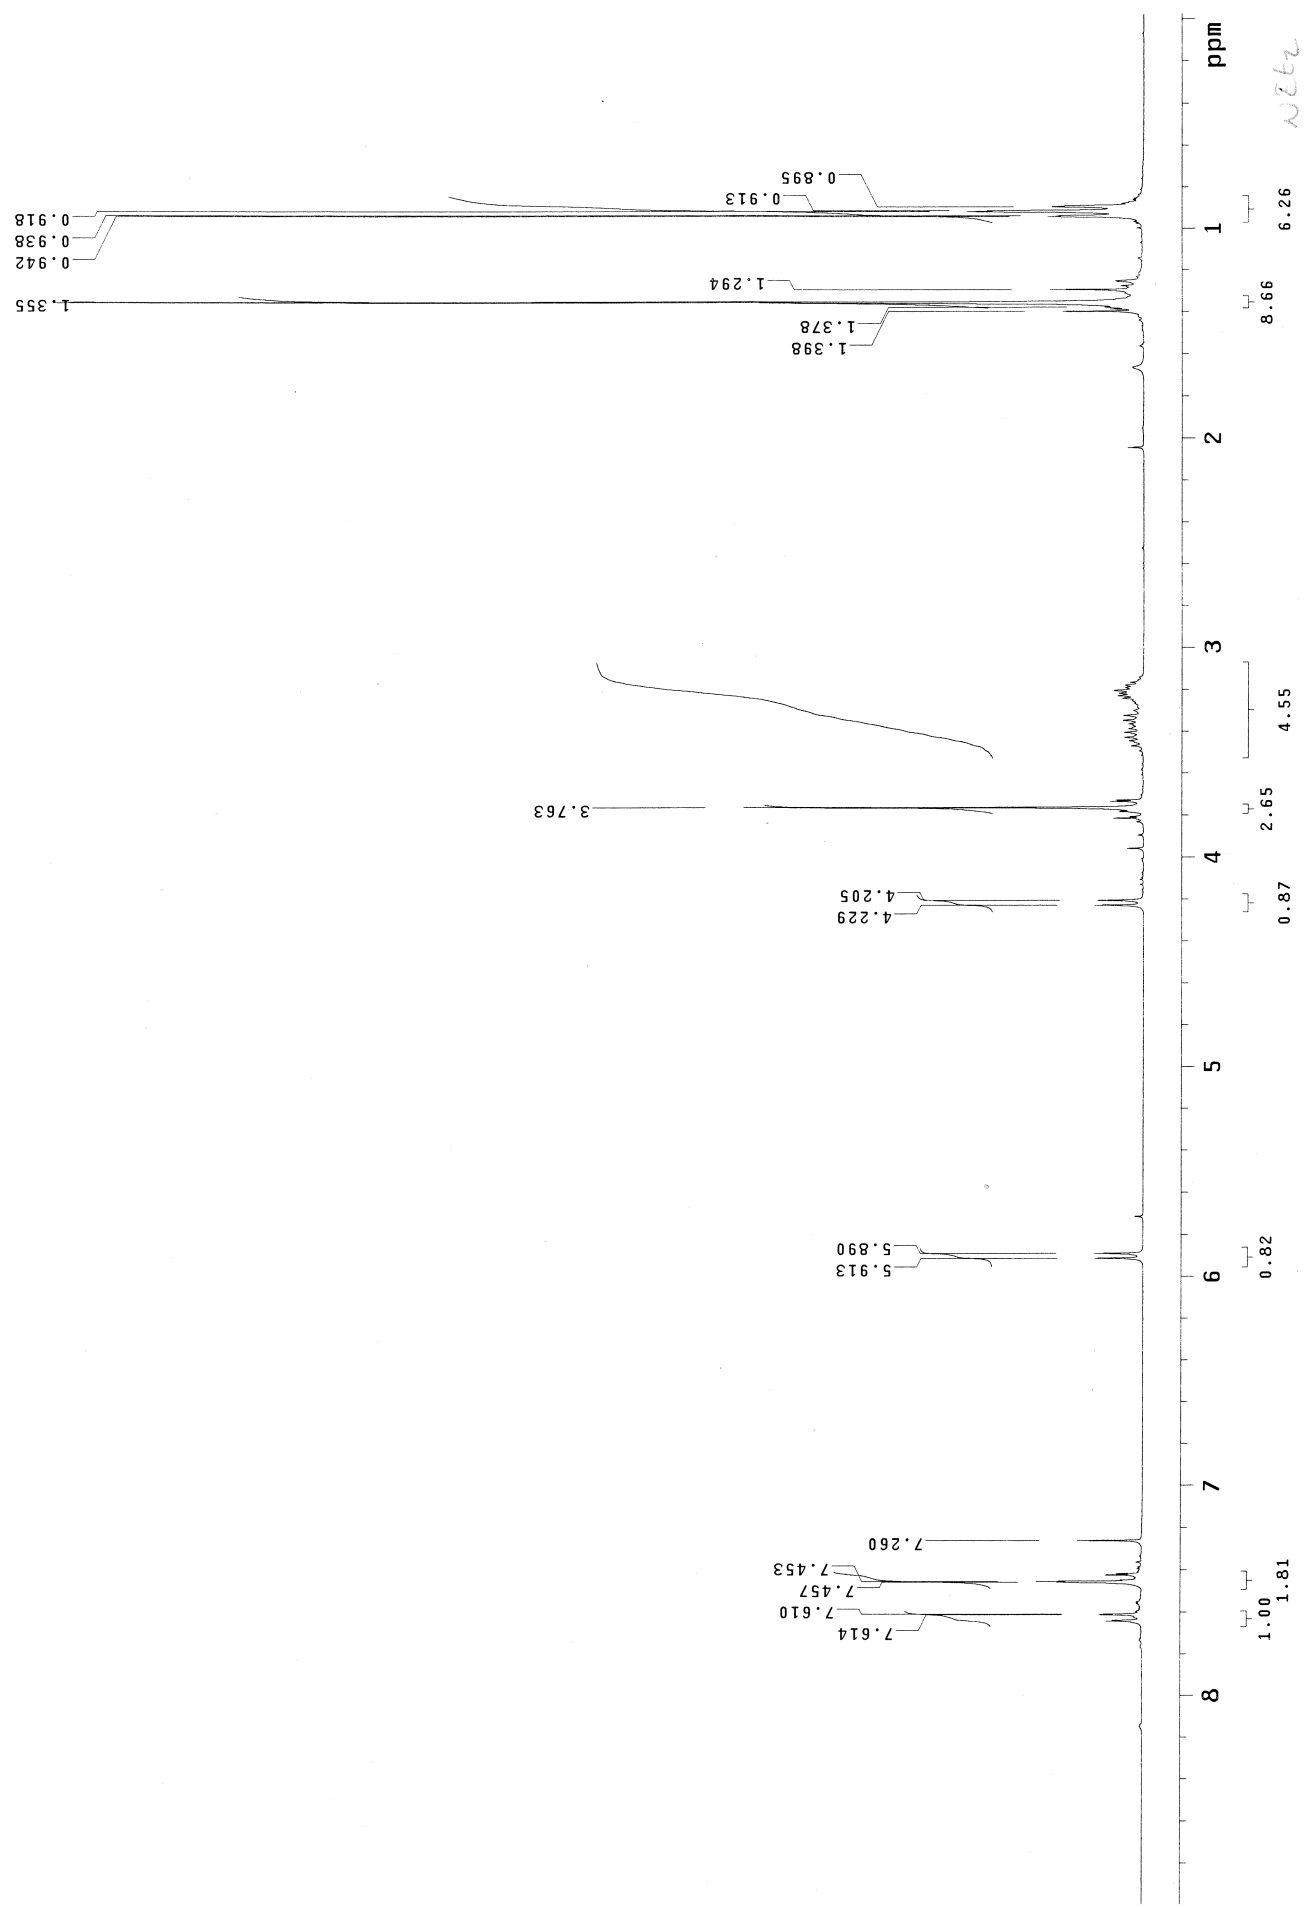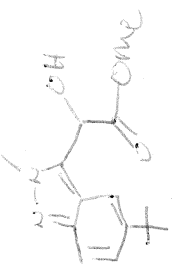

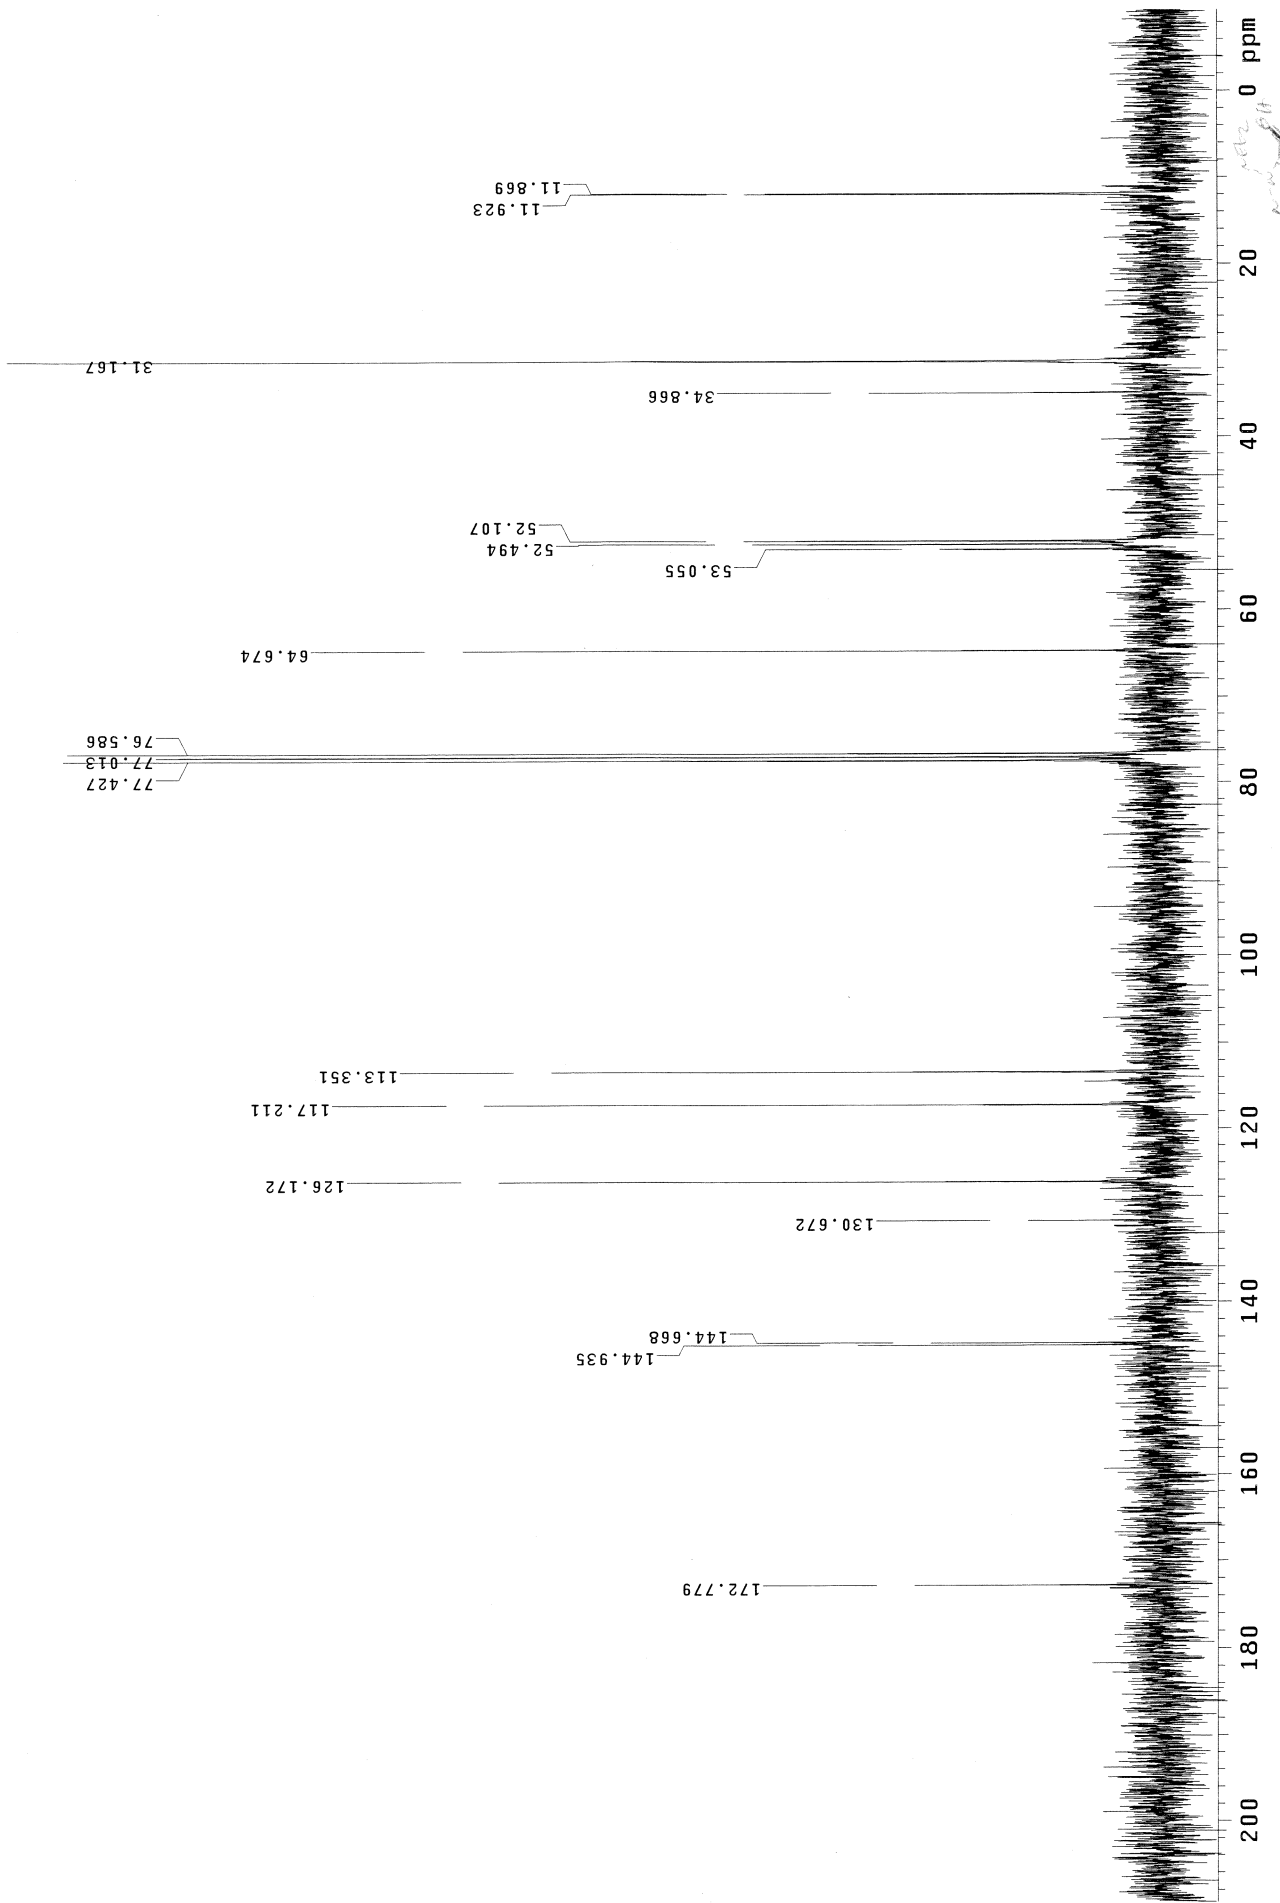

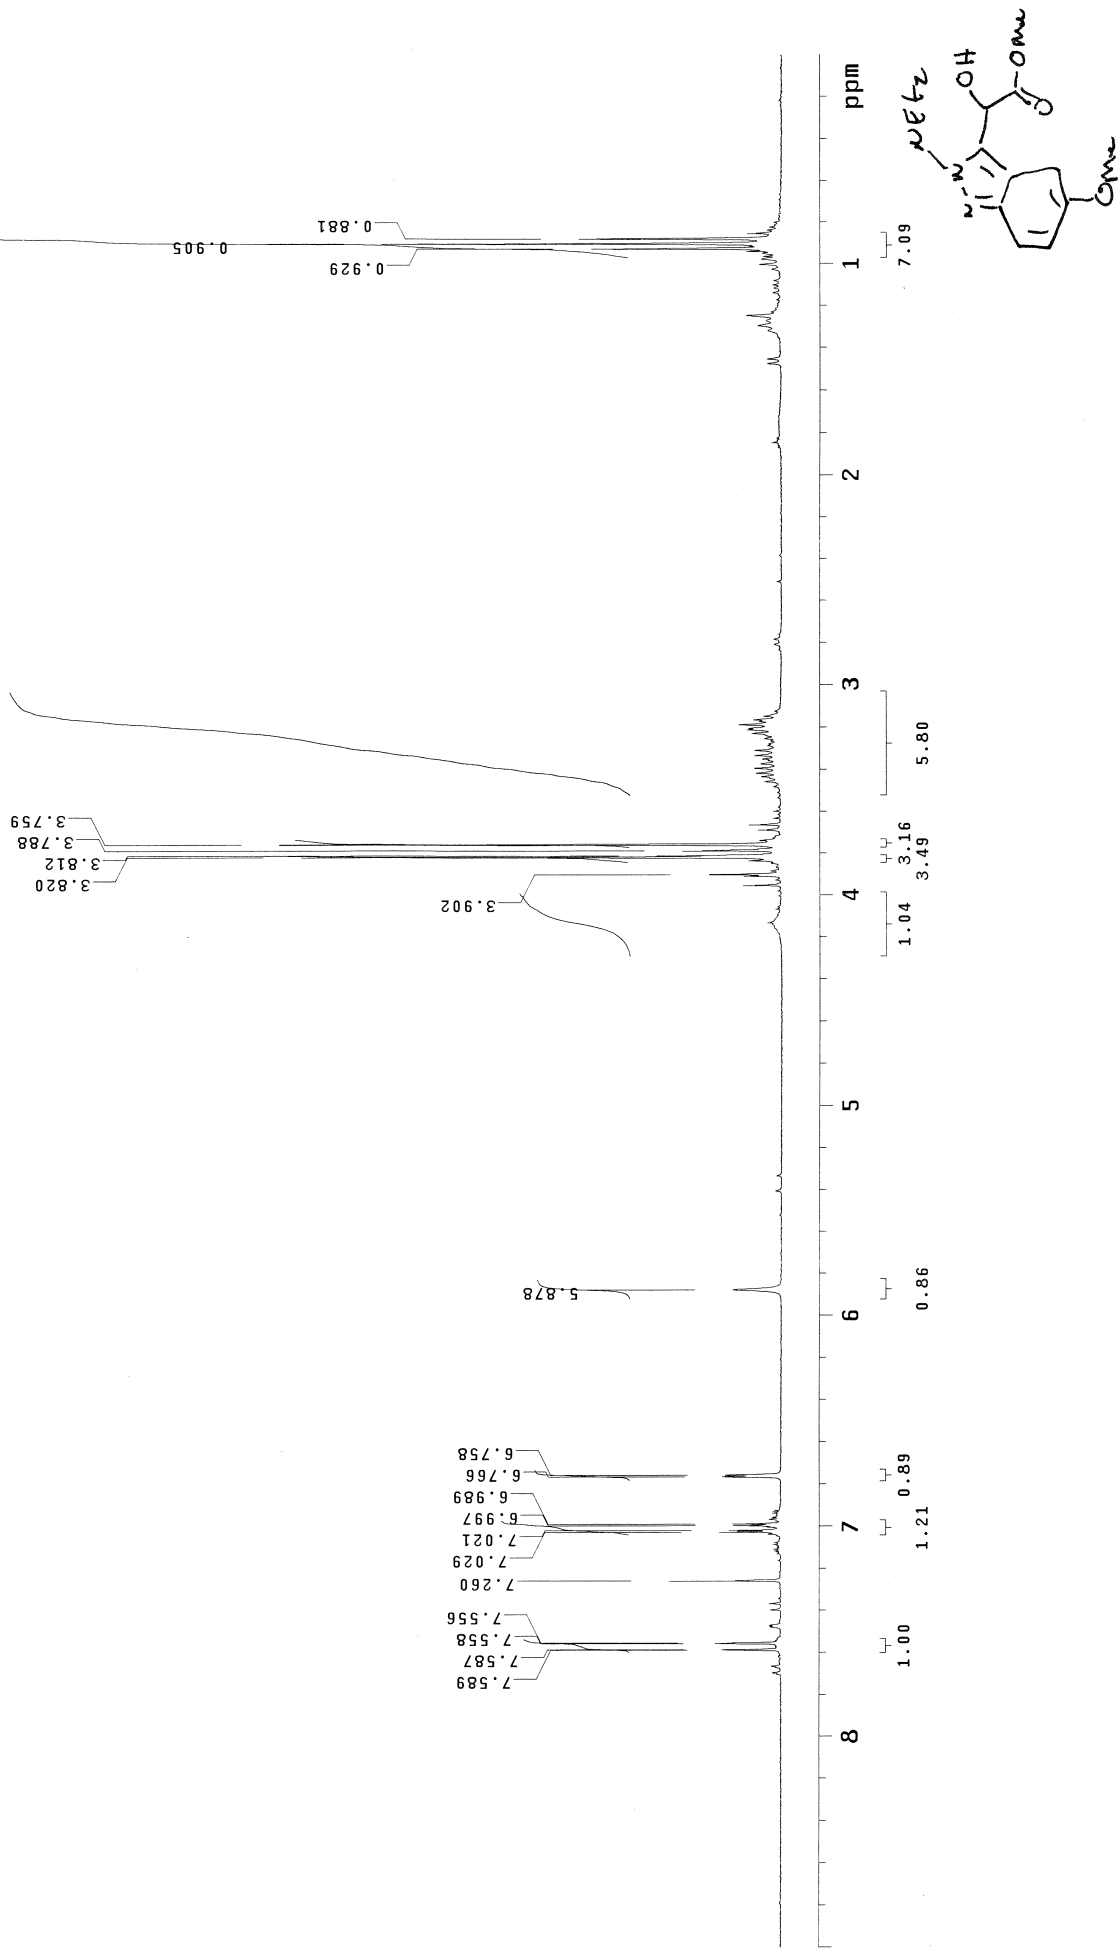

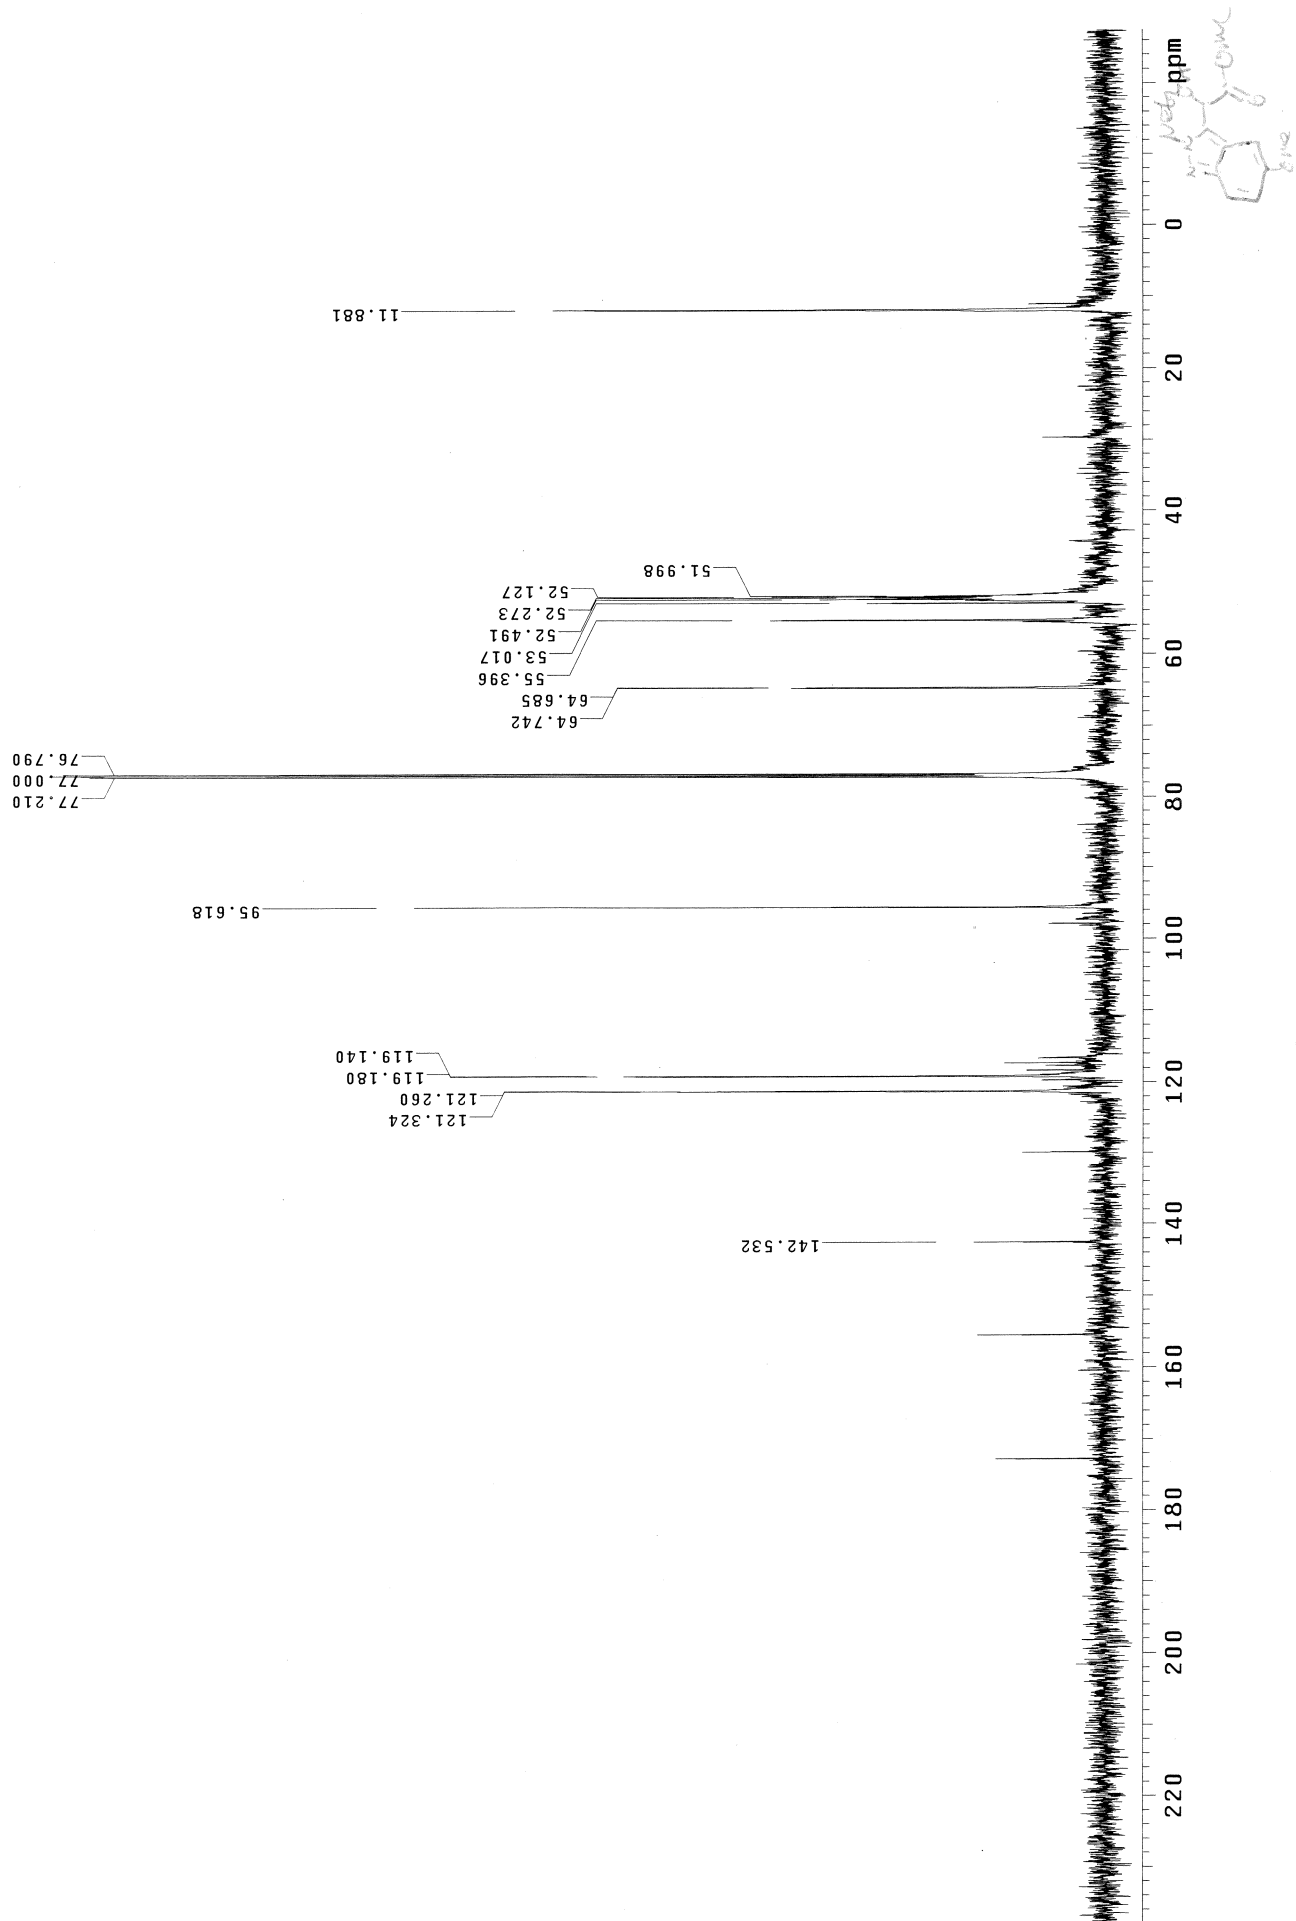

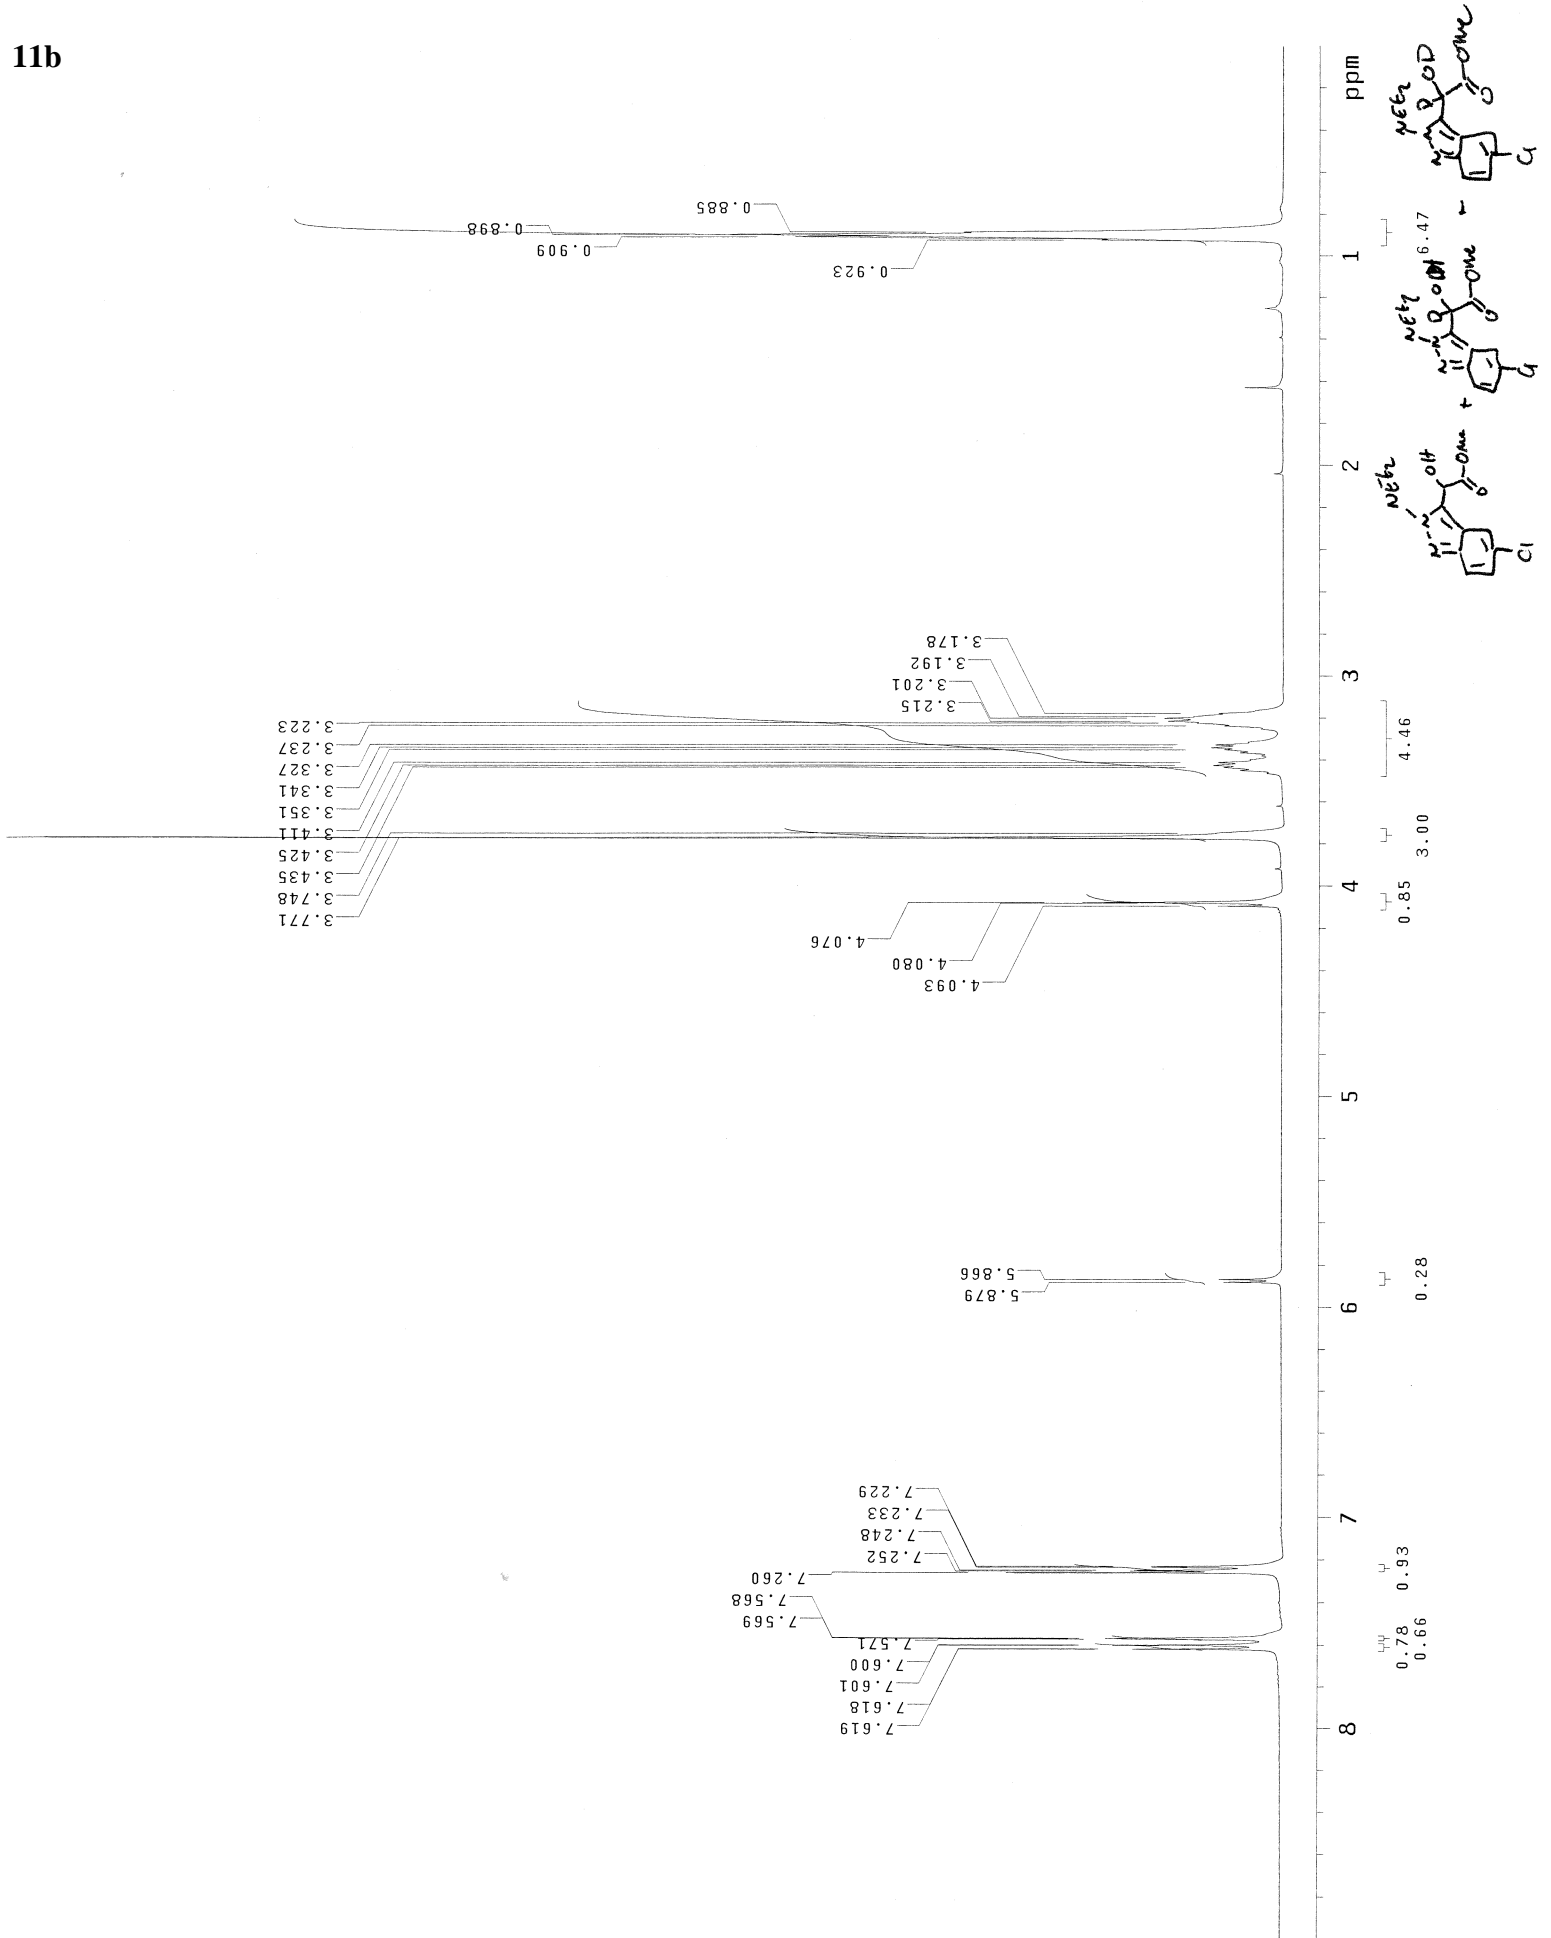

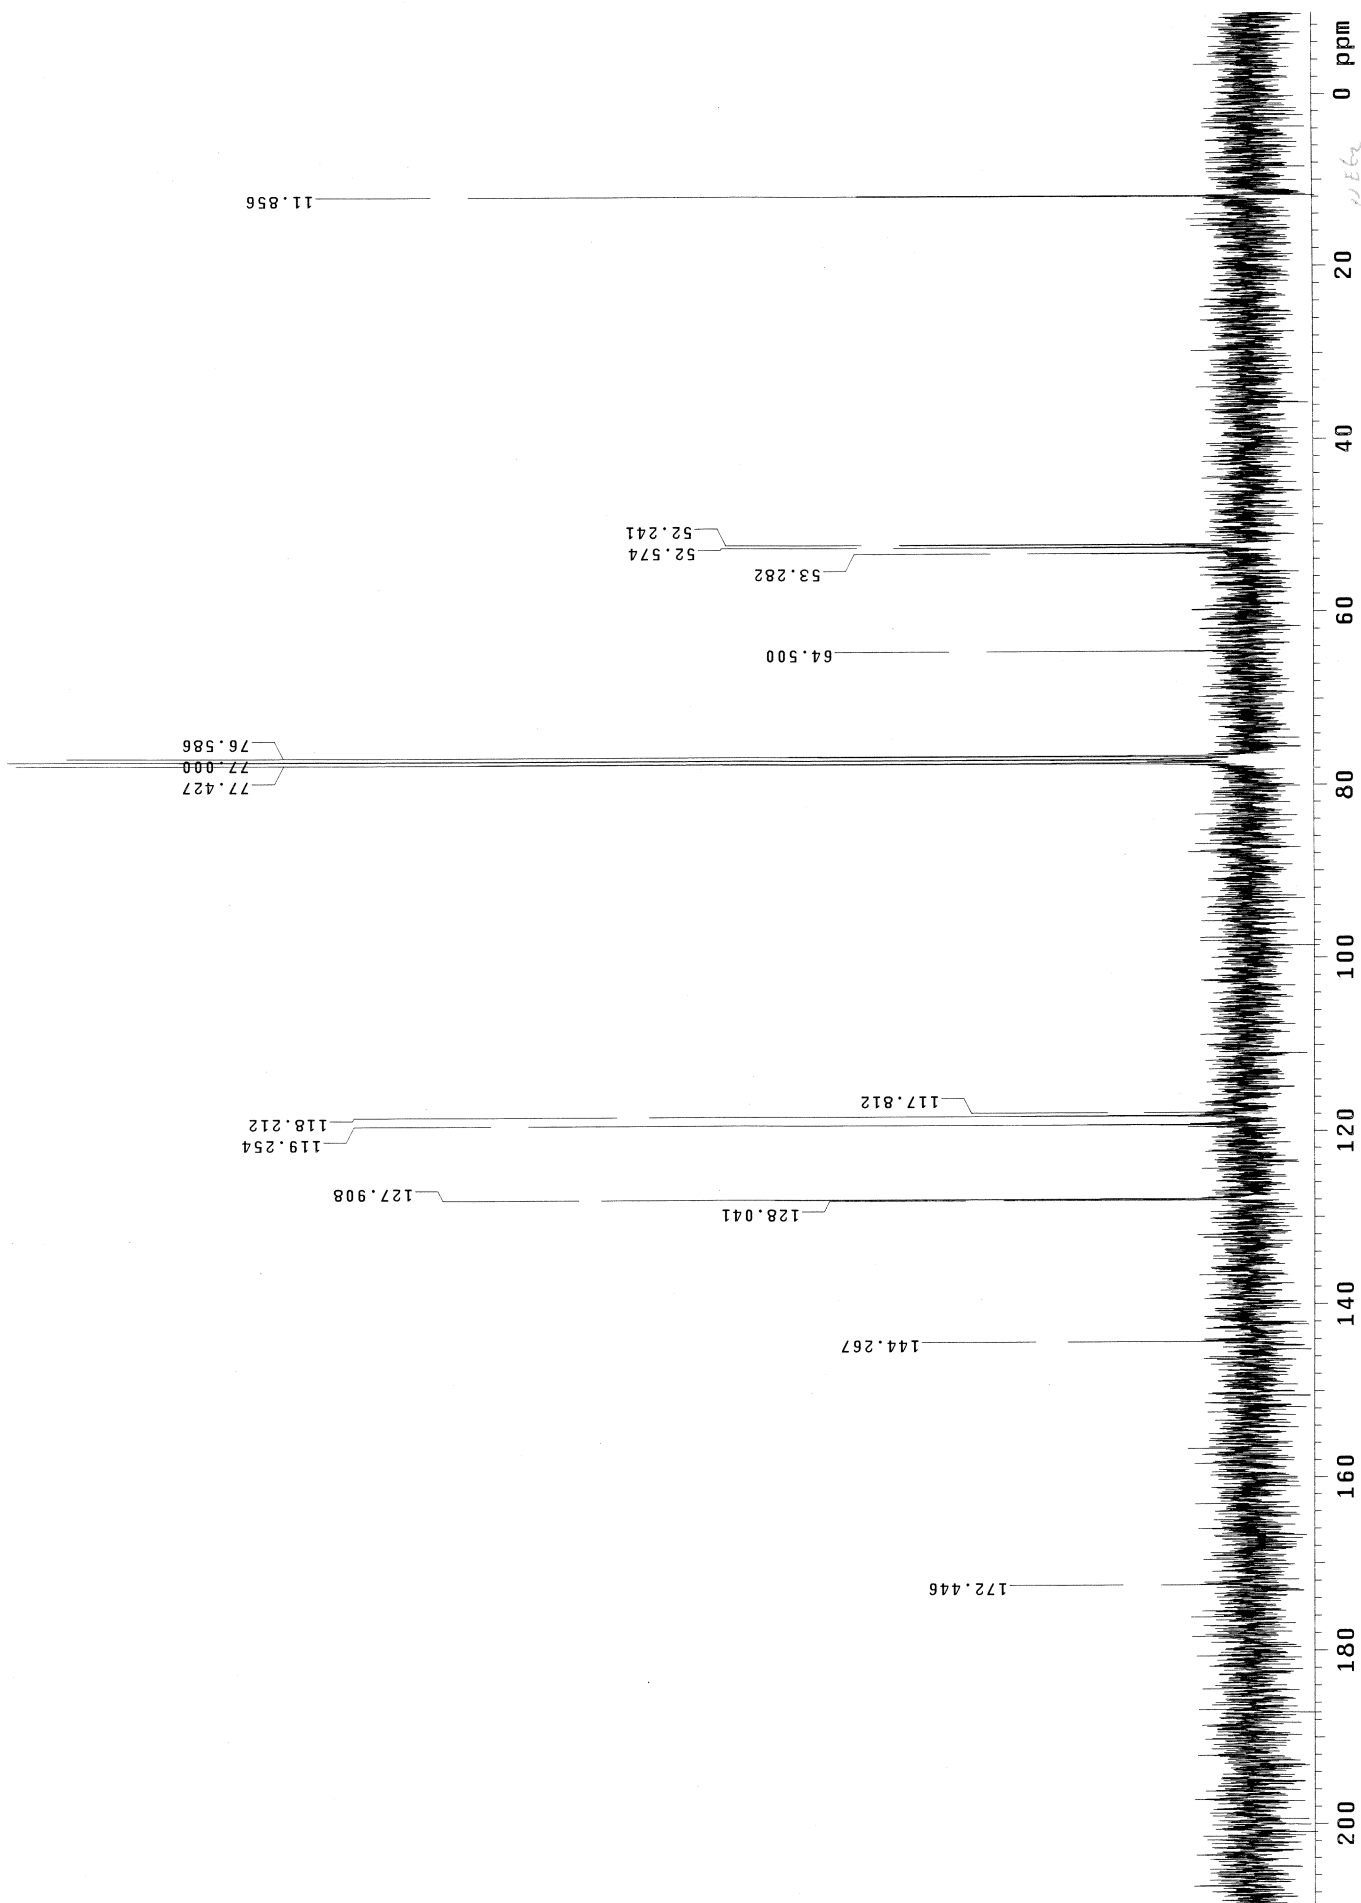

11a

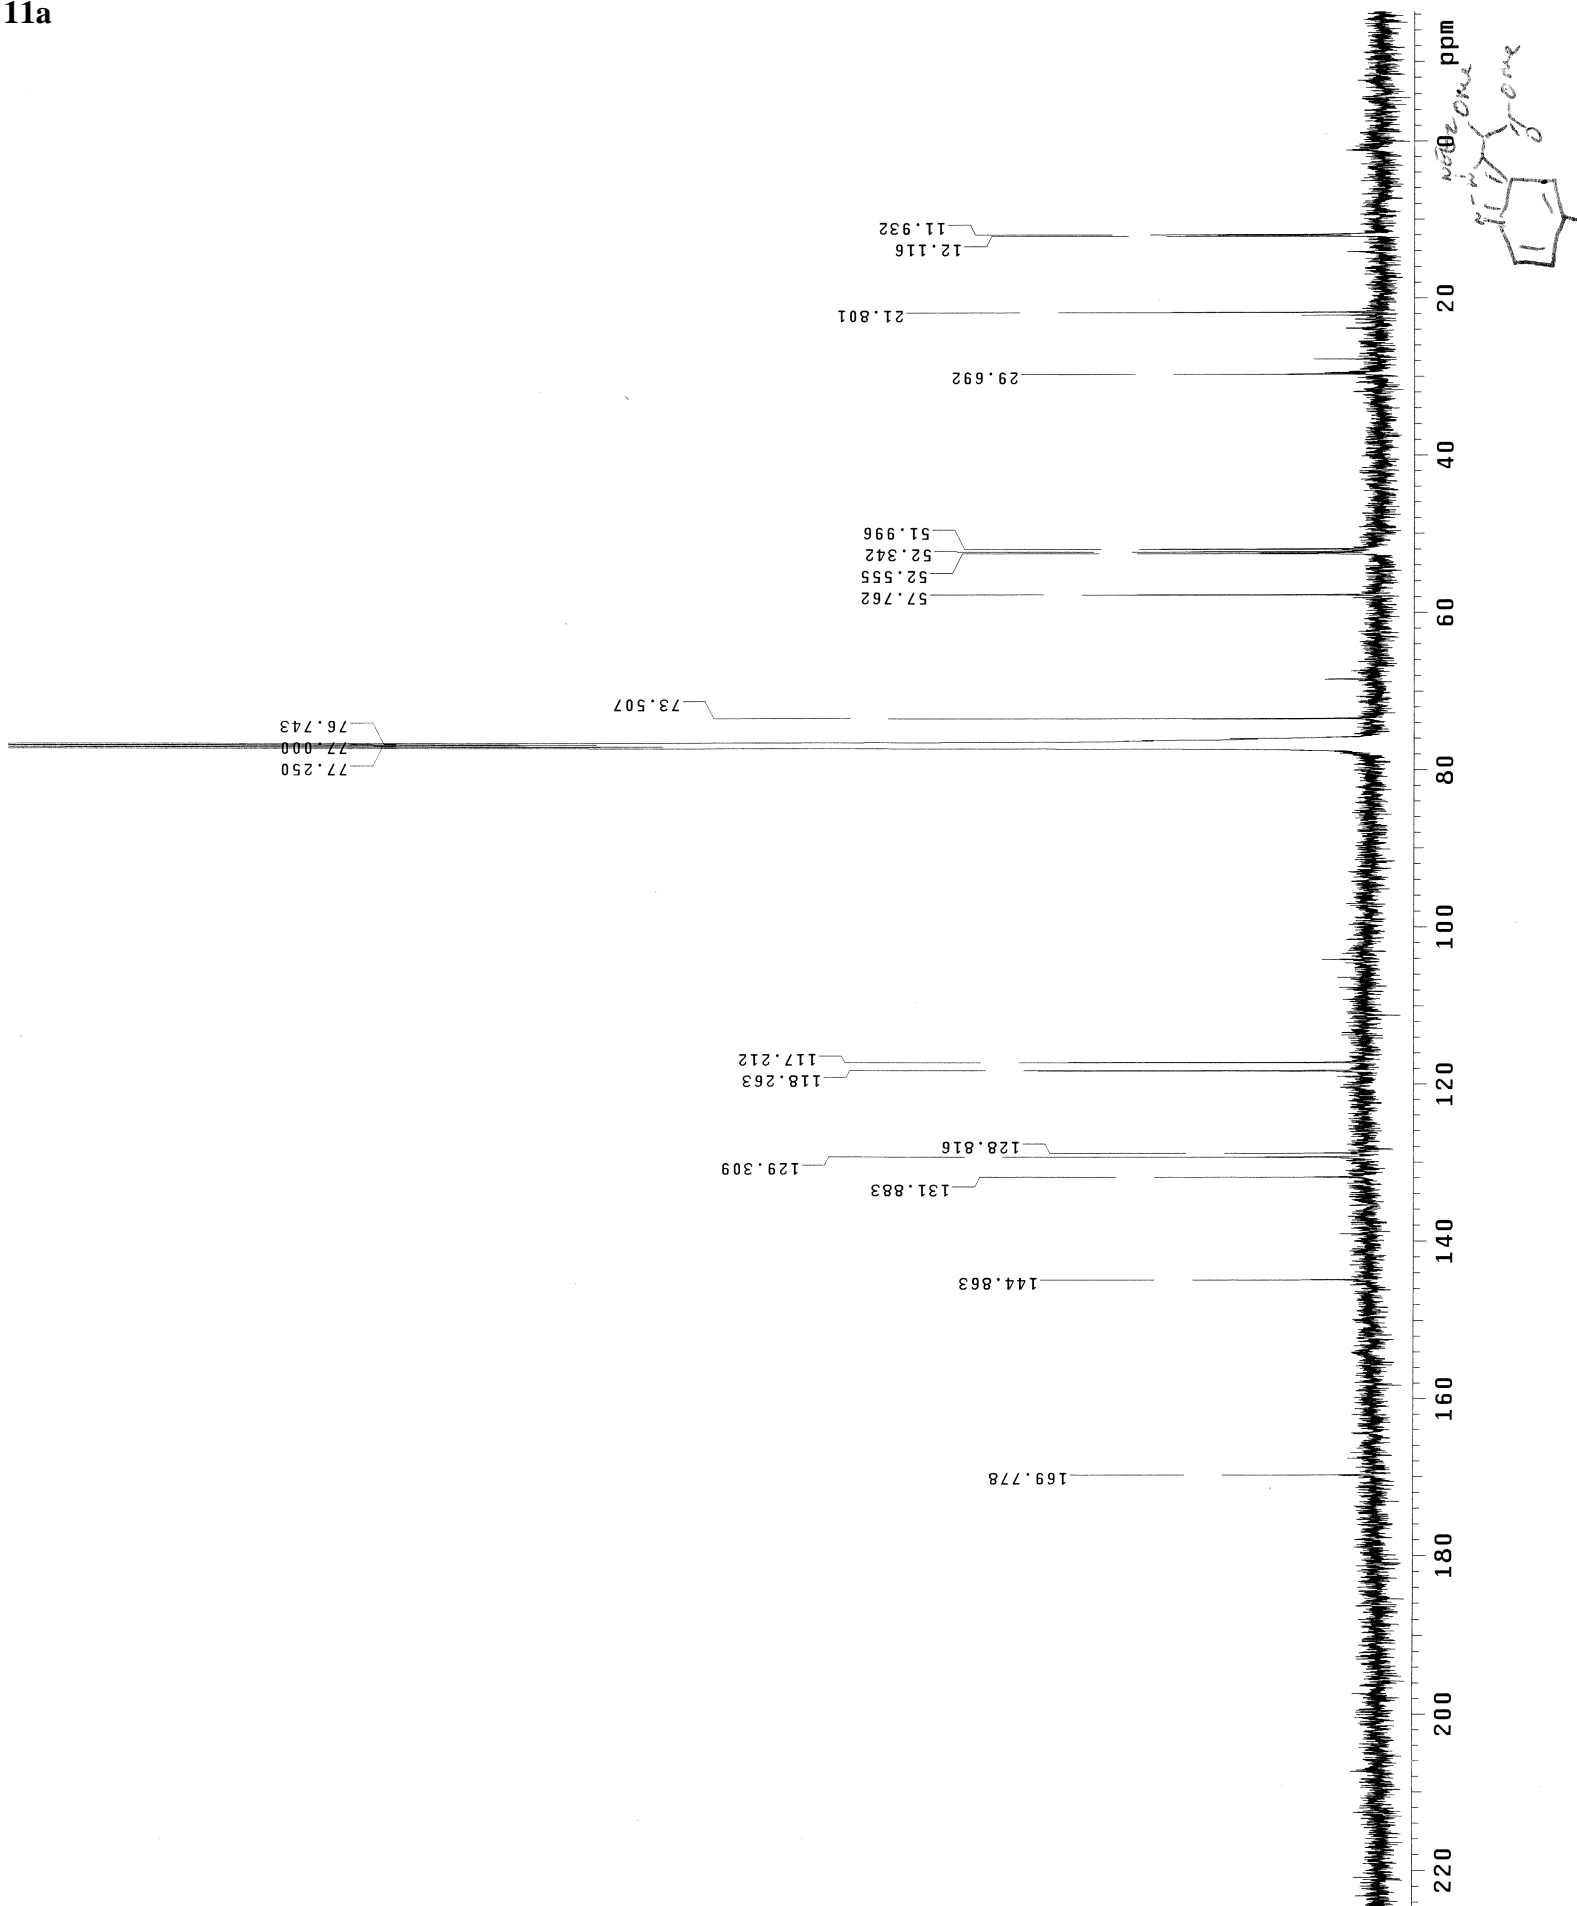



11a

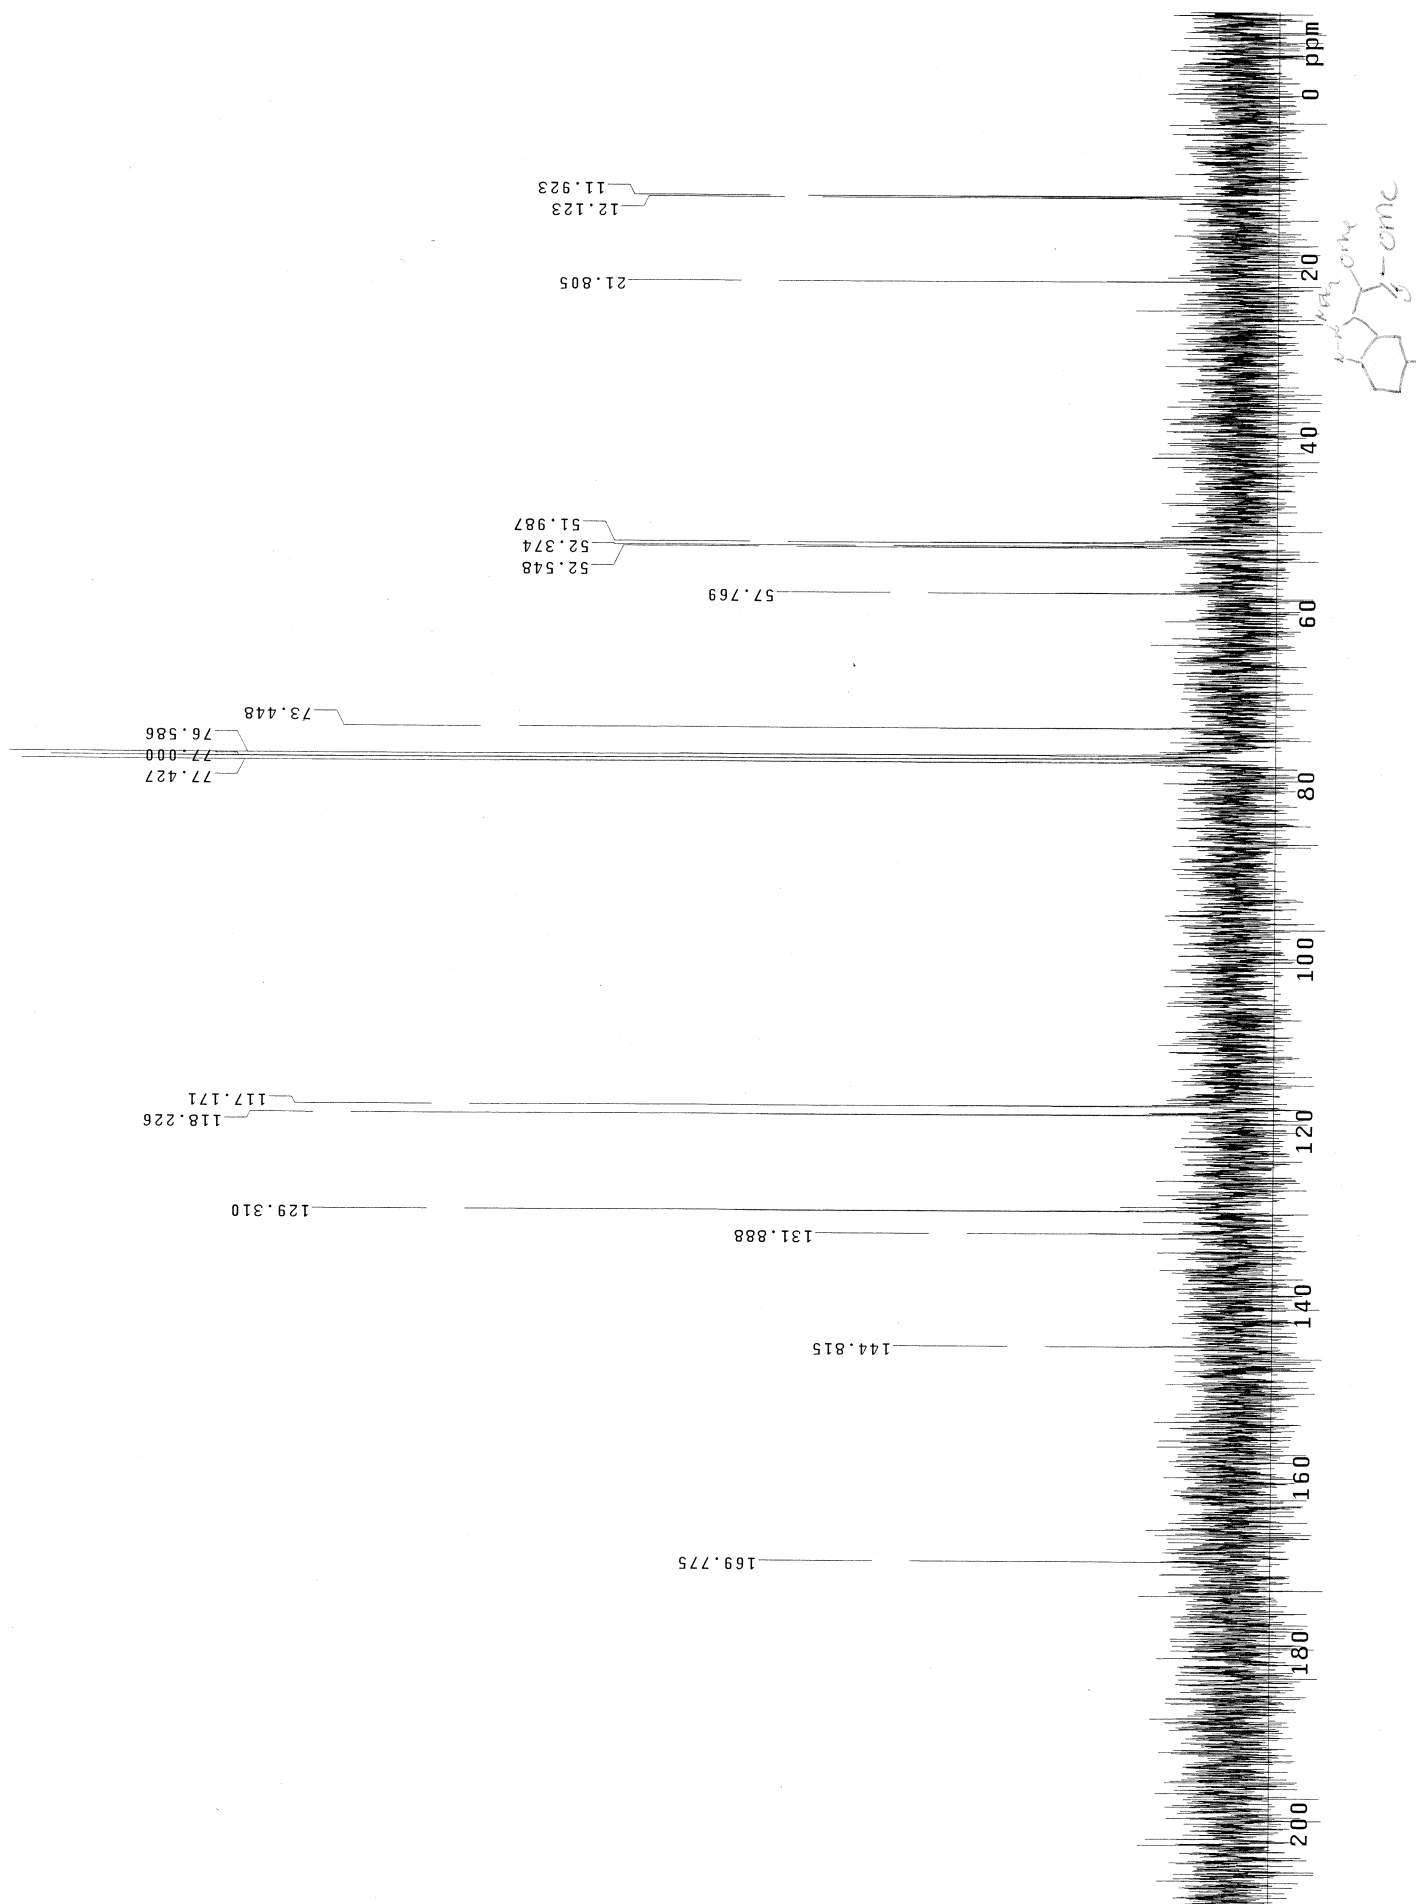

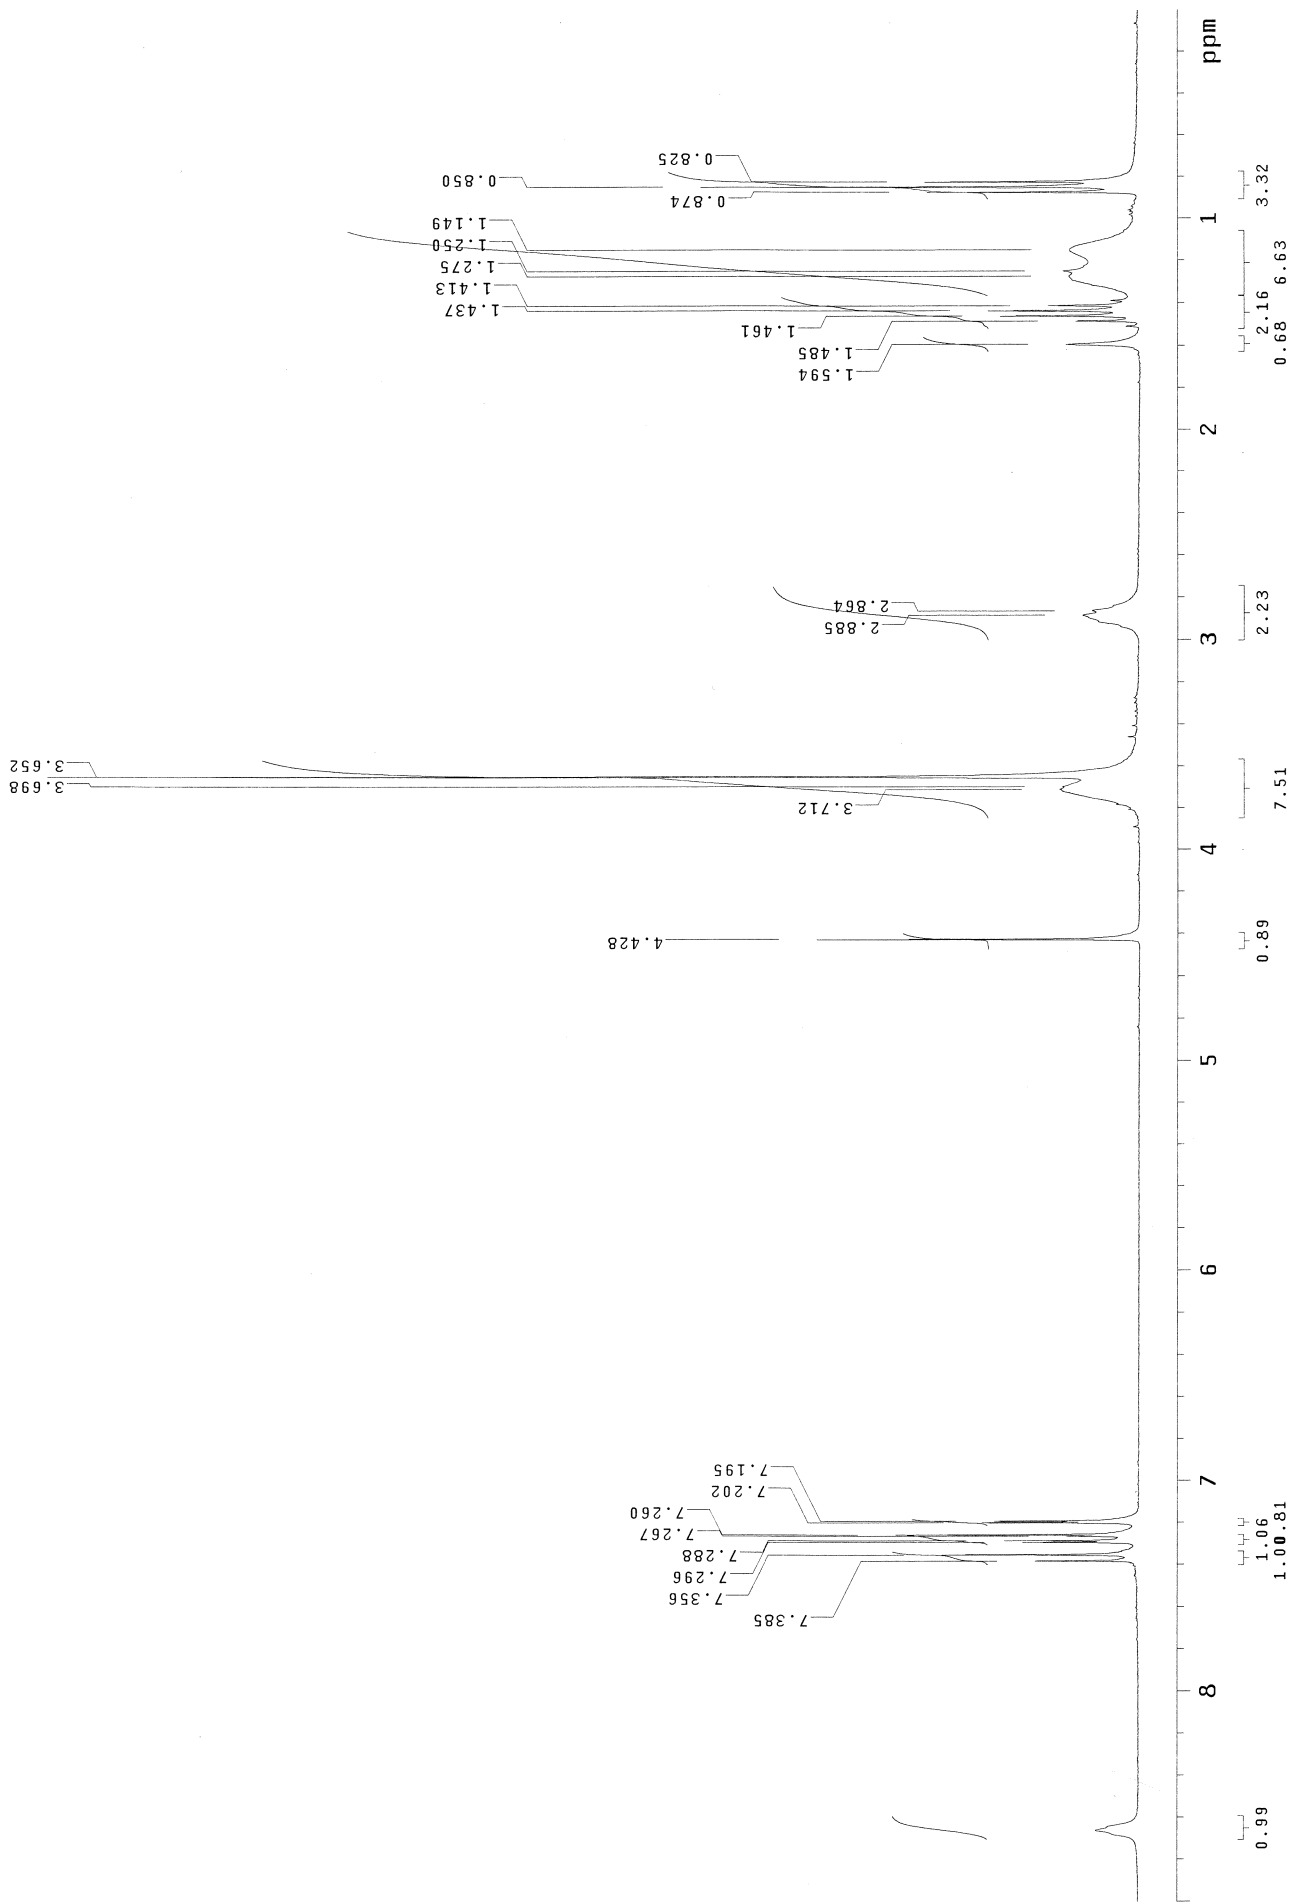

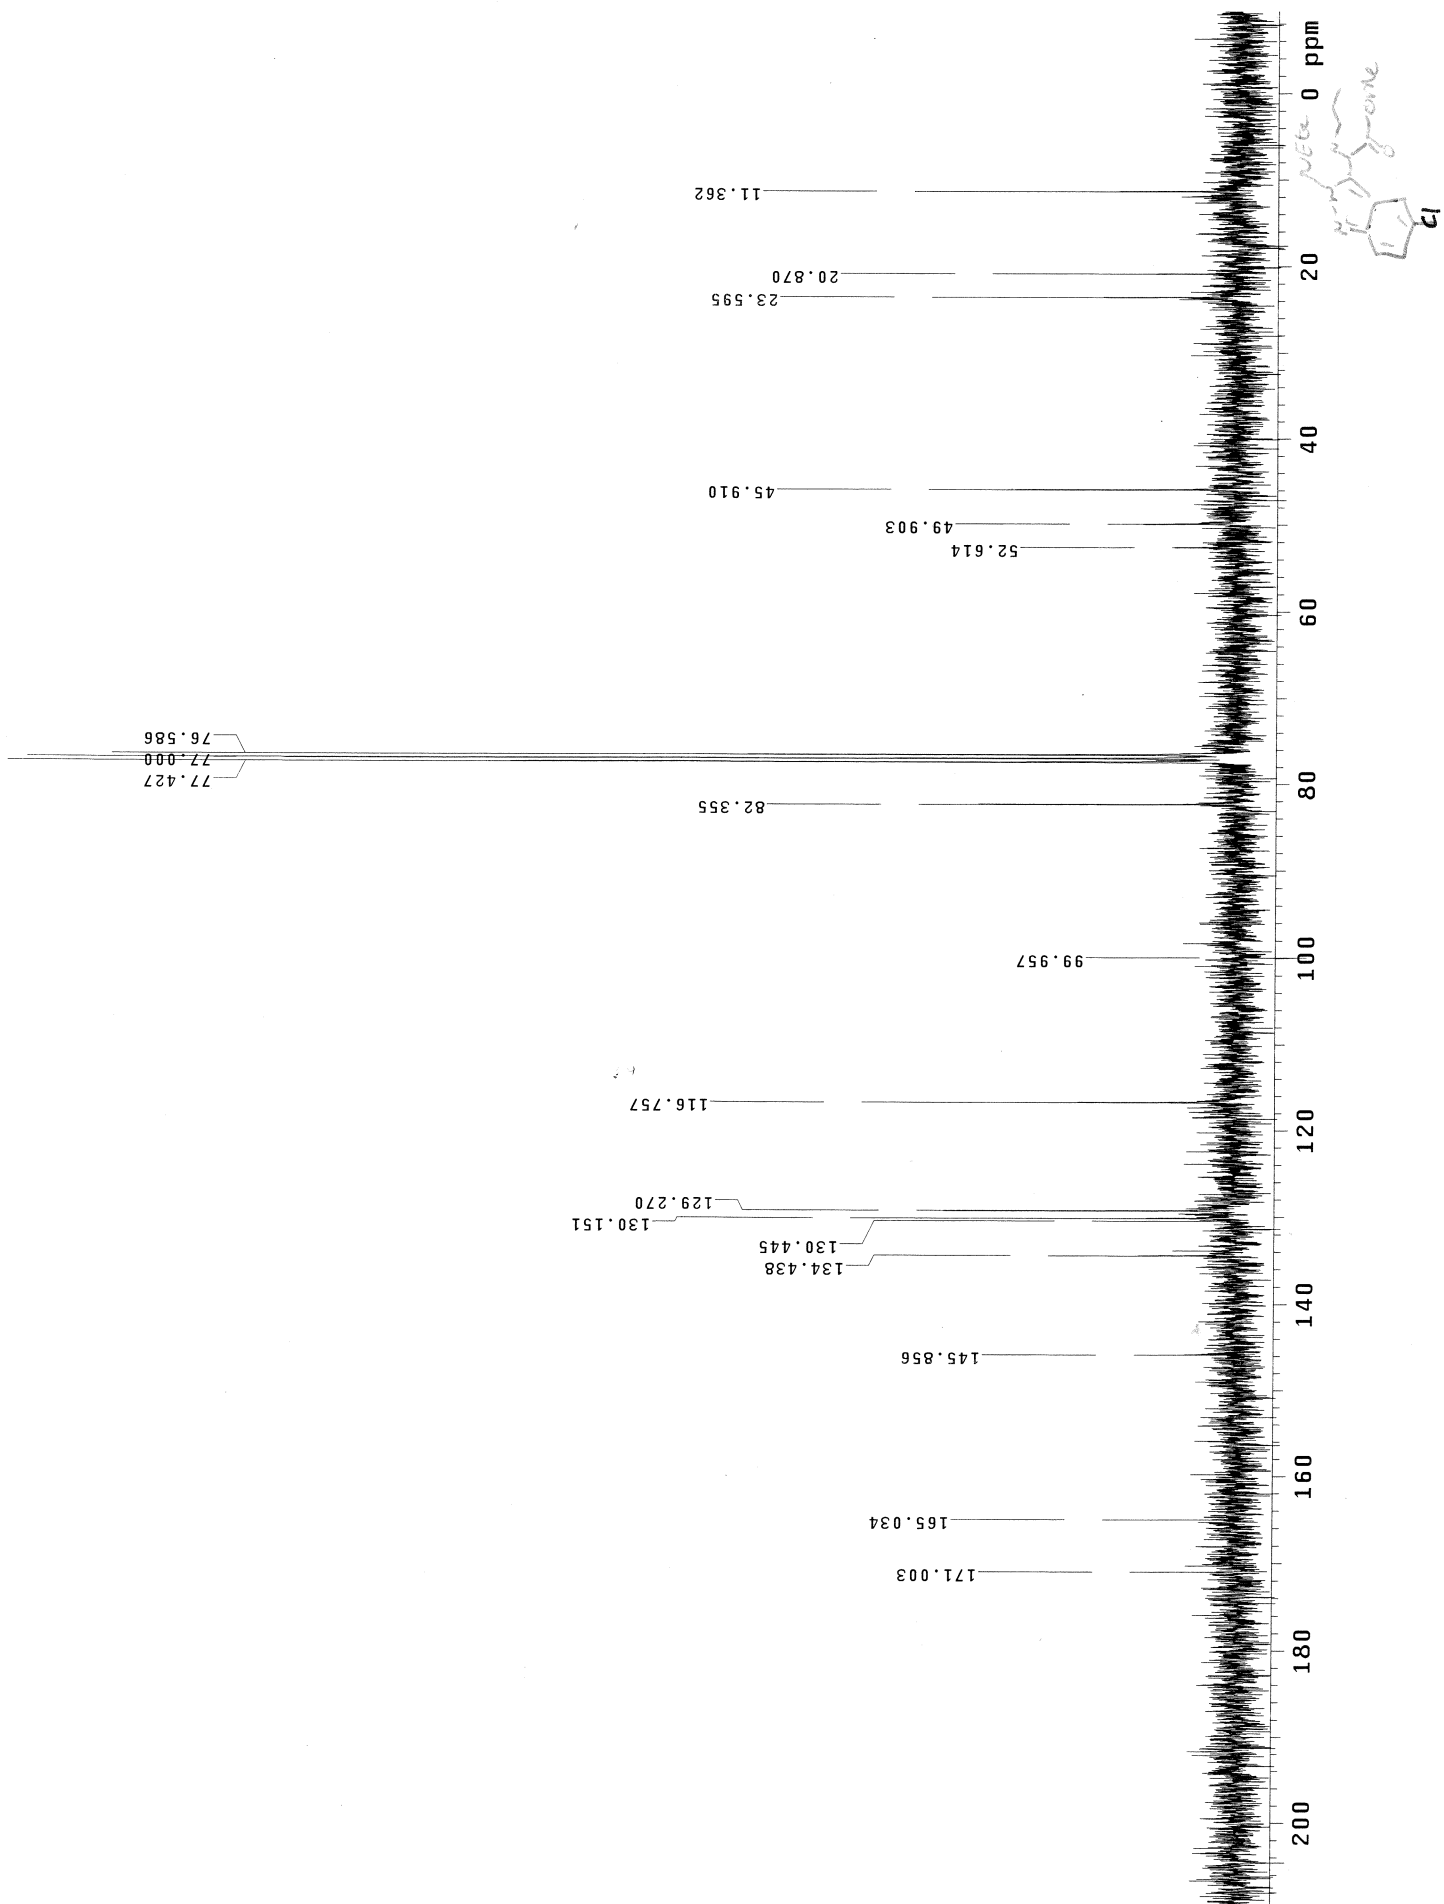

Supplement: NIHMS617754-supplement-Supp_Data.pdf [file NIHMS617754-supplement-Supp_Data.pdf]
